# Supplementary material for: A visible-light mediated ring opening reaction of alkylidenecyclopropanes for the generation of homopropargyl radicals
Source: Royal Society of Chemistry journal article supplement (doi:10.1039/d1sc01889b), 2021-01-01
Supplement: d1sc01889b1.pdf [file d1sc01889b1.pdf]

## Supporting Information

### Visible-light Mediated Ring Opening Reaction of Alkylidenecyclopropanes for the Generation of Homopropargyl Radical

Xiao-Yu Zhang,<sup>a</sup> Chao Ning,<sup>a</sup> Ben Mao,<sup>a</sup> Yin Wei<sup>\*b</sup> and Min Shi<sup>\*a,b</sup>

<sup>a</sup> Laboratory for Advanced Materials & Institute of Fine Chemicals, Key Laboratory for Advanced Materials and Feringa Nobel Prize Scientist Joint Research Center, School of Chemistry & Molecular Engineering, East China University of Science and Technology, 130 Meilong Road, Shanghai 200237, P. R. China, <sup>b</sup> State Key Laboratory of Organometallic Chemistry, Center for Excellence in Molecular Synthesis, University of Chinese Academy of Sciences, Shanghai Institute of Organic Chemistry, Chinese Academy of Sciences, 345 Lingling Road, Shanghai 200032, P. R. China. [weiyin@sioc.ac.cn](mailto:weiyin@sioc.ac.cn), [mshi@mail.sioc.ac.cn](mailto:mshi@mail.sioc.ac.cn)

#### CONTENTS

|                                                                         |      |
|-------------------------------------------------------------------------|------|
| 1. General Remarks .....                                                | S2   |
| 2. General Procedure for the Synthesis of Substrates .....              | S3   |
| 2.1 Synthesis of Alkenes .....                                          | S3   |
| 2.2 Synthesis of <i>N</i> -Hydroxyphthalimide Esters (NHP esters) ..... | S5   |
| 2.3 Synthesis of Deuterated Hantzsch Esters .....                       | S6   |
| 3. General Procedure for the Synthesis of Products .....                | S8   |
| 4. Synthetic Application of the Reaction .....                          | S9   |
| 4.1 Product Transformations .....                                       | S9   |
| 4.2 Synthesis of Drugs .....                                            | S12  |
| 5. Mechanistic Studies .....                                            | S18  |
| 5.1 Cyclic Voltammetry Experiments .....                                | S18  |
| 5.2 Stern-Volmer Fluorescence Quenching Experiments .....               | S19  |
| 5.3 Radical Trapping Experiment .....                                   | S20  |
| 5.4 Deuterium Labeling Study .....                                      | S20  |
| 5.5 DFT Calculations .....                                              | S21  |
| 6. The Characterization Data of Substrates .....                        | S26  |
| 7. The Characterization Data of Products .....                          | S57  |
| 8. References .....                                                     | S191 |

## 1. General Remarks

Melting points were determined on a digital melting point apparatus and temperatures were uncorrected. NMR spectra were recorded with a Bruker spectrometer at 400 MHz ( $^1\text{H}$  NMR), 600 MHz ( $^1\text{H}$  NMR), 100 MHz ( $^{13}\text{C}$  NMR), 150 MHz ( $^{13}\text{C}$  NMR) and 376 MHz ( $^{19}\text{F}$  NMR) in  $\text{CDCl}_3$ , respectively. Chemical shift was reported in ppm down field from internal TMS. Organic solvents used were dried by standard methods when necessary. Commercially available reagents were used without further purification. All reactions were monitored by TLC with Huanghai GF<sub>254</sub> silica gel coated plates. Flash column chromatography was carried out using 300-400 mesh silica gel at increased pressure. All reactions were performed under argon using standard Schlenk techniques if necessary. Infrared spectra were recorded on a Perkin-Elmer PE-983 spectrometer with absorption in  $\text{cm}^{-1}$ . Mass spectra were recorded by ESI and HRMS was measured on a HP-5989 instrument. The 15 W Blue LED (Manufacturer: Liangyuan-Light Factory, Model: PAR 38, Wavelength: 425 nm) was directly got from the supermarket.

## 2. General Procedure for the Synthesis of Substrates

### 2.1 Synthesis of Alkenes

Alkenes **2a-2i**, **2l-2z** and **2ae** were prepared according to the previously reported work.<sup>1-8</sup> Alkenes **2j-2k** and **2aa** were commercially available. Alkenes **2ab-2ad** were prepared by the following procedures.

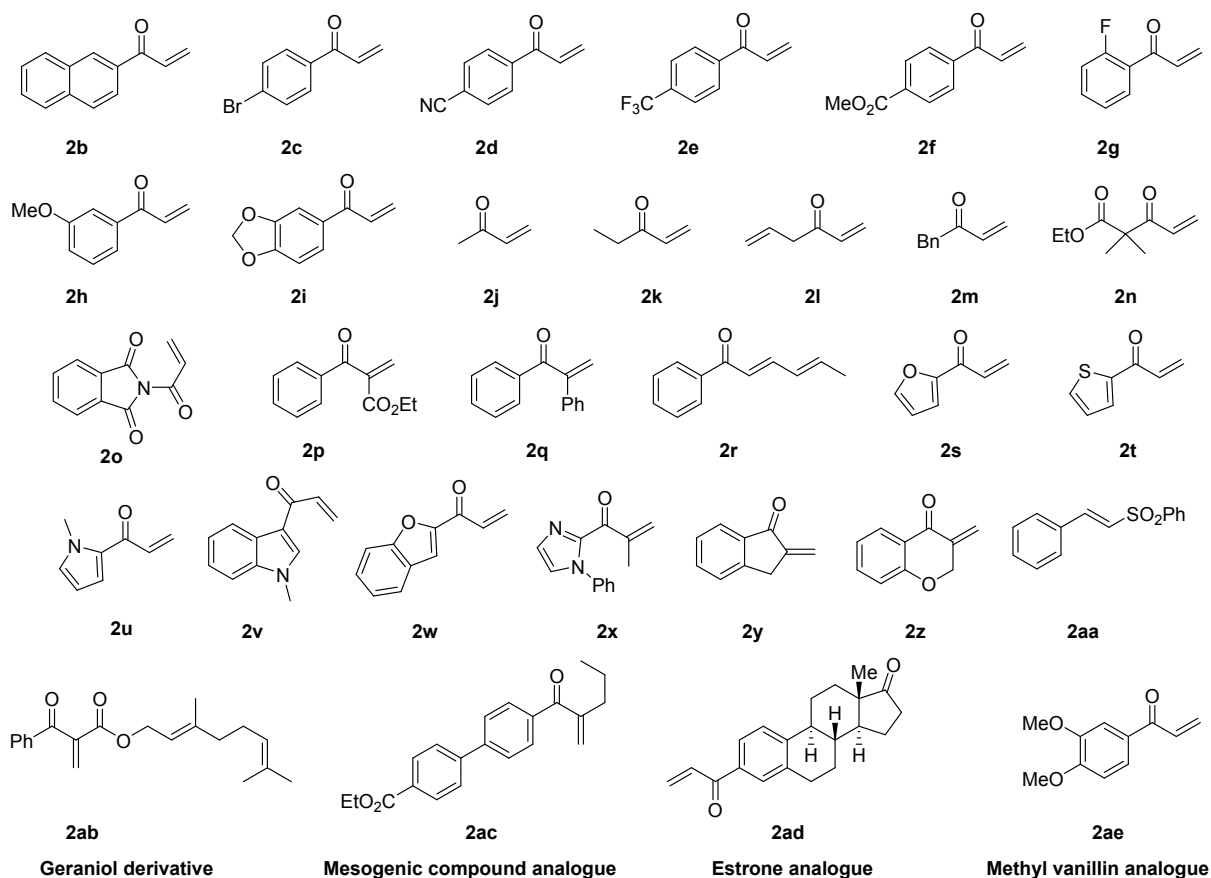

Unsuccessful examples are shown as followings.

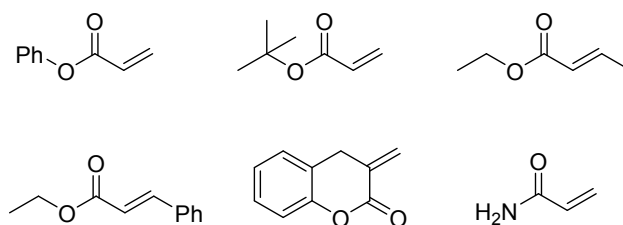

### Synthesis of Geraniol Derivative **2ab**

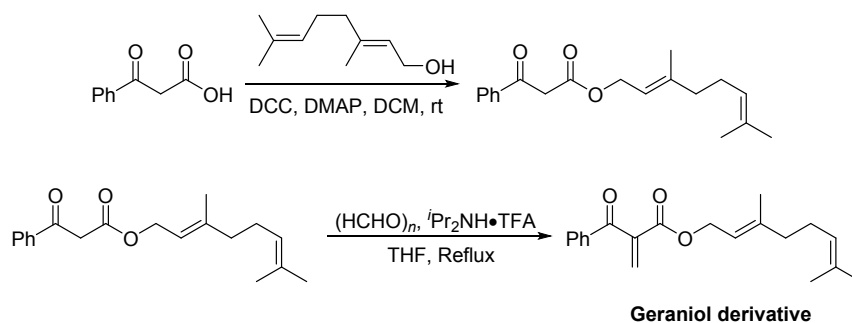

To a solution of 3-oxo-3-phenylpropanoic acid (1.92 g, 10.0 mmol, 1.0 equiv) in a mixture of  $\text{CH}_2\text{Cl}_2$  (10.0 mL) were added Geraniol (1.54 g, 10.0 mmol, 1.0 equiv), dicyclohexylcarbodiimide (2.20 g, 11.0 mmol, 1.1 equiv), and DMAP (122.0 mg, 1.0 mmol, 0.1 equiv) sequentially at room temperature. The reaction mixture was stirred overnight. Water was added and the reaction mixture was extracted with EtOAc three times. The combined organic layer was filtered through a short pad of silica gel and rinsed with elution (petroleum ether:ethyl acetate = 2:1). The filtrate was evaporated under reduced pressure to afford the crude product as colorless oil, which was directly used without further purification.

To a mixture of the crude product (2.0 mmol, 1.0 equiv) and paraformaldehyde (4.0 mmol, 2.0 equiv) in dry THF (10 mL) was added the corresponding diisopropylammonium 2,2,2-trifluoroacetate<sup>8</sup> (2.0 mmol, 1.0 equiv). The reaction mixture is stirred under reflux with oil bath for 2 h. Then, a second addition of paraformaldehyde (4.0 mmol, 2.0 equiv) is added to the reaction mixture. Next, the reaction mixture is stirred under reflux for an additional 6 h. The reaction mixture is cooled down and filtered. The filtrate was concentrated under vacuum and purified by a silica gel column chromatography (petroleum ether:ethyl acetate = 10:1) to afford the product **2ab**.

### Synthesis of Mesogenic Compound Analogue 2ac

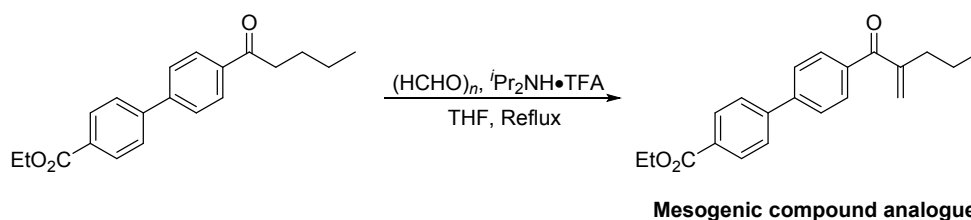

To a mixture of substrate<sup>9</sup> (2.0 mmol, 1.0 equiv) and paraformaldehyde (4.0 mmol, 2.0 equiv) in dry THF (10 mL) was added the corresponding diisopropylammonium 2,2,2-trifluoroacetate (2.0 mmol, 1.0 equiv). The reaction mixture was stirred under reflux with oil bath for 2 h. Then, a second portion of paraformaldehyde (4.0 mmol, 2.0 equiv) was added to the reaction mixture. Next, the

reaction mixture was stirred under reflux with oil bath for an additional 6 h. The reaction mixture was cooled down and filtered. The filtrate was concentrated under vacuum and purified by a silica gel column chromatography (petroleum ether:ethyl acetate = 10:1) to afford the product **2ac**.

### Synthesis of Estrone Analogue 2ad

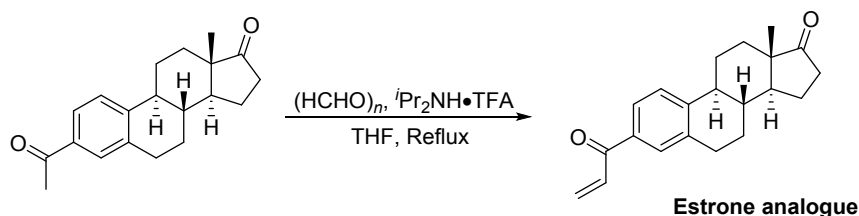

To a mixture of substrate<sup>10</sup> (2.0 mmol, 1.0 equiv) and paraformaldehyde (4.0 mmol, 2.0 equiv) in dry THF (10 mL) was added the corresponding diisopropylammonium 2,2,2-trifluoroacetate (2.0 mmol, 1.0 equiv). The reaction mixture was stirred under reflux with oil bath for 2 h. Then, a second portion of paraformaldehyde (4.0 mmol, 2.0 equiv) was added to the reaction mixture. Next, the reaction mixture was stirred under reflux with oil bath for an additional 6 h. The reaction mixture was cooled down and filtered. The filtrate was concentrated under vacuum and the crude product was purified by a silica gel column chromatography (petroleum ether:ethyl acetate = 30:1) to afford the final product **2ad**.

### 2.2 Synthesis of *N*-Hydroxyphthalimide Esters (NHP esters)

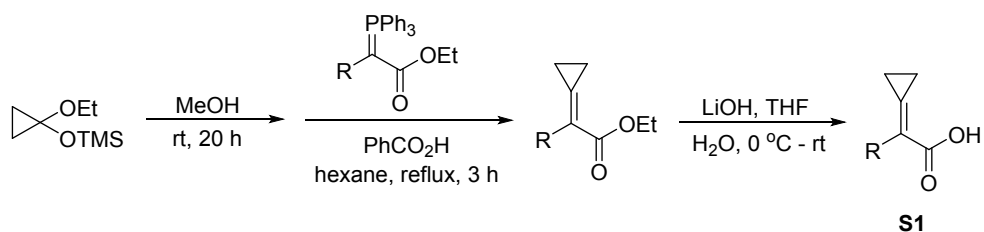

This procedure was modified from the previous literature.<sup>11-12</sup> In a round bottom flask equipped with a magnetic stir bar 1-ethoxycyclopropoxy)trimethylsilane (1.74 g, 10 mmol, 1.0 equiv) was dissolved in methanol (4.9 mL). After stirred for 20 hours at room temperature, methanol was removed in *vacuo*. The residue was dissolved in hexane (50 mL), and the benzoic acid (244 mg, 2 mmol, 0.2 equiv) was added. This flask was brought to gentle reflux in an oil bath. To the refluxing solution was added the corresponding ylide<sup>13</sup> (12 mmol, 1.2 equiv) at a rate so as to maintain reflux. After complete the addition, the reaction mixture was allowed to reflux for an additional hour. After

cooling to room temperature, hexane was removed *in vacuo* and the residue was washed with consecutive petroleum ether solution until no further precipitation of triphenylphosphine oxide. Washings were then concentrated *in vacuum* and purified *via* a column chromatography (petroleum ether:ethyl acetate = 10:1) to give cyclopropylidene ethyl ester as crude colourless oil in the yields ranging from 40% to 60%.

Lithium hydroxide (2.0 equiv) dissolved in distilled water (20 mL) was added to the THF solution (20 mL) of the cyclopropylidene ethyl ester (1.0 equiv) at 0 °C with an ice bath. This mixture was stirred at room temperature and monitored by TLC analysis. After the ester was totally consumed, the reaction mixture was acidified with an aqueous solution of 20% hydrochloric acid. The aqueous solution was extracted with ether and the combined organics were dried over anhydrous sodium sulfate. This crude mixture was concentrated *in vacuo* to give the crude product as a yellow oil, which could be directly used for the next step without further purification.

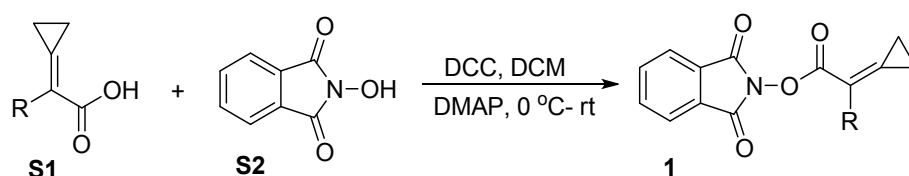

An oven-dried 100 mL round bottom flask containing a teflon-coated magnetic stir bar was charged with **S1** (1.0 equiv), *N*-hydroxyphthalimide **S2** (1.2 equiv), DMAP (0.1 equiv) and DCM under nitrogen atmosphere. The flask was cooled to 0 °C with an ice bath and DCC (1.2 equiv) in DCM was added dropwise for 15 minutes. The resulted mixture was stirred at room temperature and monitored by TLC analysis. After the **S1** was completely consumed, the heterogeneous mixture was filtered and the filtrate was concentrated under reduced pressure. The residue was purified with a flash column chromatography (petroleum ether:ethyl acetate = 10:1) to afford substrates **1** in moderate to good yields.

## 2.3 Synthesis of Deuterated Hantzsch Esters

### 4,4-dideuterio-2,6-dimethyl-3,5-dicarbethoxy-1,4-dihydropyridine

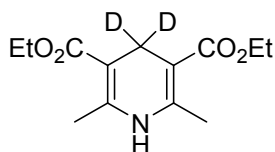

Compound **2af** was synthesized according to the previously reported literature procedure.<sup>14</sup> An

oven-dried round bottom flask was charged with ethyl acetoacetate (1.6 mL, 12.48 mmol, 4.0 equiv),  $d_2$ -paraformaldehyde (0.1 g, 3.12 mmol, 1.0 equiv), ammonium acetate (0.48 g, 6.24 mmol, 2.0 equiv) and water (6.5 mL), then the mixture was heated at 86 °C in an oil bath. After 3 hours, the reaction mixture was allowed to cool down to room temperature and filtered. The precipitate was dried in *vacuo* to afford the desired compound **2af** as a yellow solid.

#### 1,4,4-trideuterio-2,6-dimethyl-3,5-dicarbethoxy-1,4-dihydropyridine

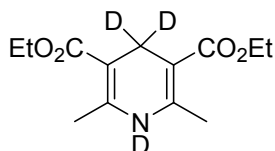

Compound **2ag** was synthesized by following the previously reported literature procedure.<sup>15</sup> In an oven dried round bottom flask compound **2ag** (0.1g, 0.39 mmol) and CD<sub>3</sub>OD (1 mL) were mixed and stirred for overnight under argon atmosphere. The solvent was evaporated and the desired compound **2ag** was obtained as a pale green solid.

### 3. General Procedure for the Synthesis of Products

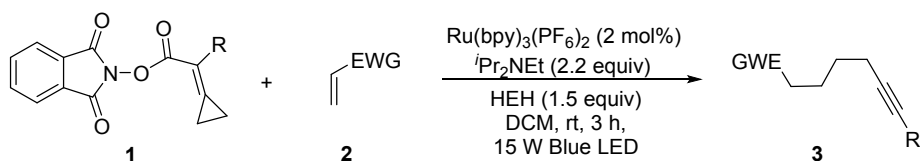

An oven-dried Schlenk tube (20 mL) was equipped with a magnetic stir bar, and substrate **1** (0.3 mmol, 1.5 equiv), **2** (0.2 mmol, 1.0 equiv),  $\text{Ru}(\text{bpy})_3(\text{PF}_6)_2$  (3.4 mg, 2 mol%),  $\text{Pr}_2\text{NEt}$  (0.44 mmol, 2.2 equiv), Hantzsch ester (diethyl 2,6-dimethyl-1,4-dihydropyridine-3,5-dicarboxylate) (0.3 mmol, 1.5 equiv) and DCM (3.0 mL) were added. The tube was degassed by alternating vacuum evacuation (10 min) and argon backfill three times. The tube was placed at a distance (app. 5 cm) from 15 W Blue LED, and the resulting yellow solution was stirred at ambient temperature for 3 hours under visible-light irradiation. When the reaction was finished up, the mixture was evaporated in *vacuo*. The crude products were directly purified by a flash chromatography on silica gel (petroleum ether:ethyl acetate = 20:1) to give the desired products.

#### Reaction Setup

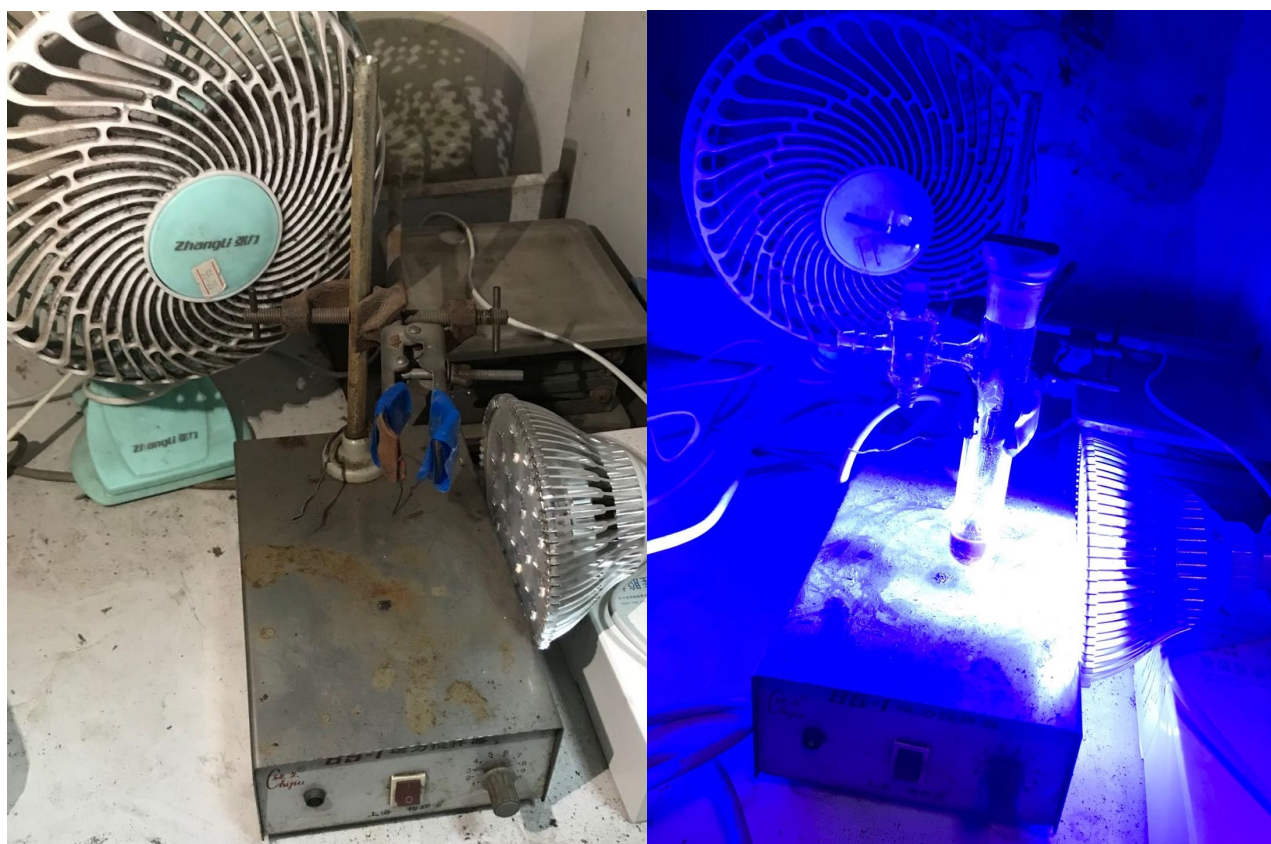



## 4. Synthetic Application of the Reaction

### 4.1 Product Transformations

#### Synthesis of Compound 4

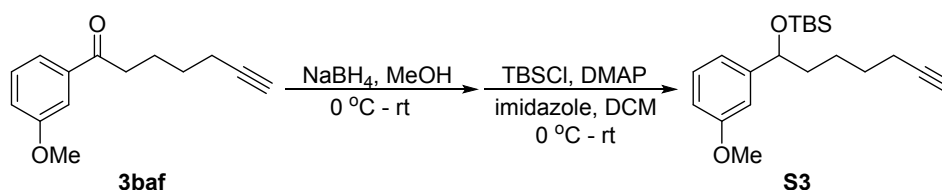

An over-dried 50 mL round bottom flask containing a teflon-coated magnetic stir bar was charged with **3baf** (216.3 mg, 1.0 mmol, 1.0 equiv) and MeOH under air. The flask was cooled to 0 °C with an ice bath and NaBH<sub>4</sub> (45.4 mg, 1.2 mmol, 1.2 equiv) was added in portions. The resulted mixture was stirred at room temperature and monitored by TLC analysis. After the substrate was completely consumed, the heterogeneous mixture was filtered and the filtrate was concentrated under reduced pressure. The residue was treated with water and DCM. The layers were separated and the water phase was extracted with DCM (10 mL) for three times. The combined organic layers were dried over anhydrous Na<sub>2</sub>SO<sub>4</sub> and concentrated under reduced pressure. The crude product could be directly used for the next step without further purification.

A 50 mL round bottom flask containing a teflon-coated magnetic stir bar was charged with alcohol (174.6 mg, 0.8 mmol, 1.0 equiv), DMAP (9.8 mg, 0.08 mmol, 0.1 equiv), imidazole (59.9 mg, 0.88 mmol, 1.1 equiv) and DCM (10 mL) under argon atmosphere. The flask was cooled to 0 °C with ice bath and TBSCl (132.6 mg, 0.88 mmol, 1.1 equiv) was added dropwise. The resulted mixture was stirred at room temperature for 12 h. The heterogeneous mixture was filtered and the filtrate was concentrated under reduced pressure. The residue was purified with a flash column chromatography (petroleum ether:ethyl acetate = 10:1) to afford product **S3** in 90% yield.

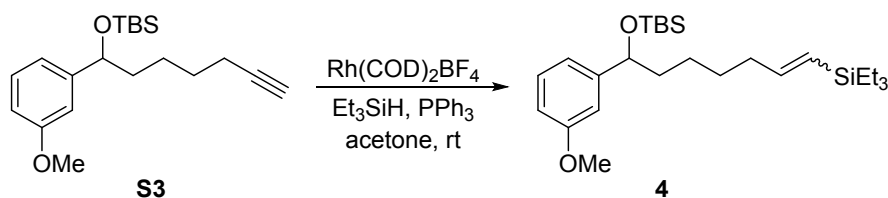

To a solution of Rh(COD)<sub>2</sub>BF<sub>4</sub> (0.61 mg, 0.015 mmol, 0.005 equiv) and triphenylphosphine (0.79 mg, 0.03 mmol, 0.01 equiv) in acetone (2 mL) was added successively **S3** (99.8 mg, 0.3 mmol, 1.0 equiv) and Et<sub>3</sub>SiH (52.4 mg, 0.45 mmol, 1.5 equiv) at room temperature. After being stirred for 20 h, the solvent was evaporated and the residue was purified by a column chromatography on silica

gel (petroleum ether:ethyl acetate = 20:1) to afford product **4** in 87% yield.

### Synthesis of Compound 5

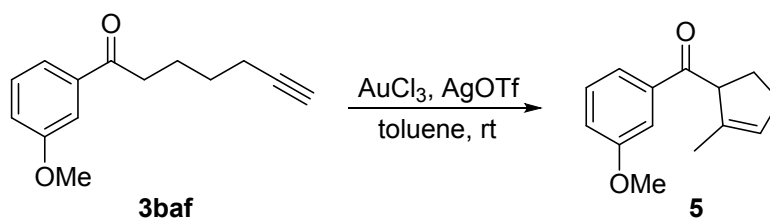

In an oven-dried 10 mL Schlenk tube was equipped with a magnetic stir bar, substrate **3baf** (64.9 mg, 0.3 mmol, 1.0 equiv),  $\text{AuCl}_3$  (4.5 mg, 0.015 mmol, 0.05 equiv),  $\text{AgOTf}$  (11.6 mg, 0.045 mmol, 0.15 equiv) and toluene (2 mL) were added. The resulting mixture was stirred vigorously at room temperature for 8 h. After that, the mixture was concentrated under reduced pressure. The residue was purified by a flash column chromatography (petroleum ether:ethyl acetate = 20:1) on silica gel to afford **5** as a pale oil (90% yield).

### Synthesis of Compound 6

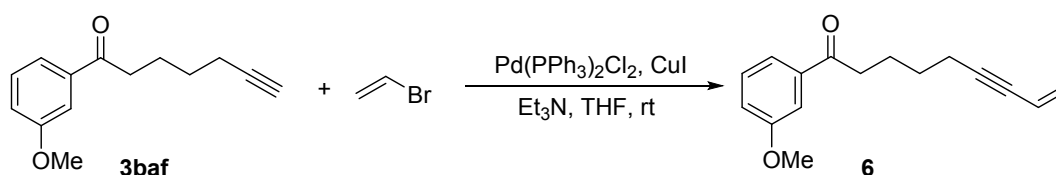

In an oven-dried 20 mL Schlenk tube was equipped with a magnetic stir bar,  $\text{Pd}(\text{PPh}_3)_2\text{Cl}_2$  (2.1 mg, 0.003 mmol, 0.01 equiv),  $\text{CuI}$  (2.6 mg, 0.012 mmol, 0.04 equiv) were added. The mixture was evacuated and backfilled with argon for three time, and the flask was equipped with a balloon filled with argon. A solution of substrate **3baf** (64.9 mg, 0.3 mmol, 1.0 equiv) in THF (2.5 mL) was added *via* a syringe, followed by the addition of 2-vinylbromide (0.54 mL, 0.54 mmol, 1.0 M solution in THF, 1.8 equiv), anhydrous degassed  $\text{Et}_3\text{N}$  (0.1 mL, 0.69 mmol, 2.3 equiv). The Schlenk tube was sealed with a screw-cap and stirred at room temperature. After stirring for 12 h, the reaction mixture was cooled to room temperature and concentrated. The residue was purified by a flash column chromatography (petroleum ether:ethyl acetate = 10:1) on silica gel to give product **6** as colorless oil (99% yield).

### Synthesis of Compound 7

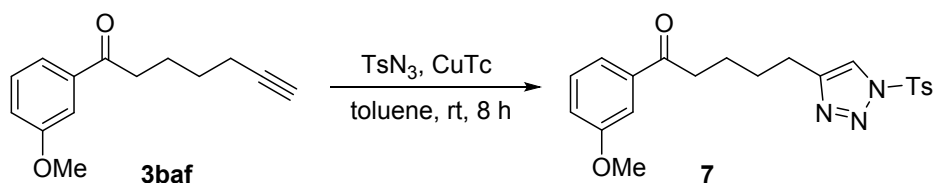

In an oven-dried 10 mL Schlenk tube was equipped with a magnetic stir bar, substrate **3baf** (108.2 mg, 0.5 mmol, 1.0 equiv), CuTc (9.54 mg, 0.05 mmol, 0.1 equiv) and toluene (5 mL) were added. After 10 minutes, TsN<sub>3</sub> (118.4 mg, 0.6 mmol, 1.2 equiv) was added in one portion. The resulting mixture was stirred vigorously at room temperature for 8 hours. After that, the mixture was concentrated under reduced pressure. The residue was purified by a flash column chromatography (petroleum ether:ethyl acetate = 4:1) on silica gel to afford **7** as white solid (95% yield).

### Synthesis of Compound 8

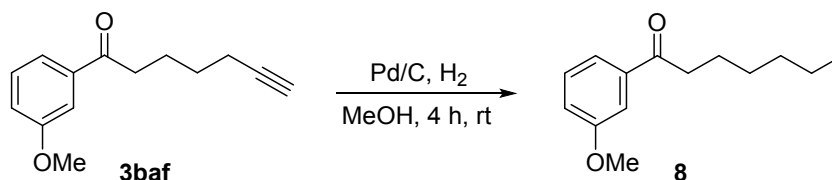

To a flask was added compound **3baf** (64.9 mg, 0.3 mmol, 1.0 equiv), Pd/C (32 mg) and menthol (8 mL). After the reaction mixture was stirred at room temperature for 4 hours under 1 atm H<sub>2</sub>, the resulting mixture was filtered with a pad of celite. The filtrate was concentrated. The residue was purified by flash column chromatography (petroleum ether) on silica gel to give product **8** as a colorless oil (98% yield).

### Synthesis of Compound 9

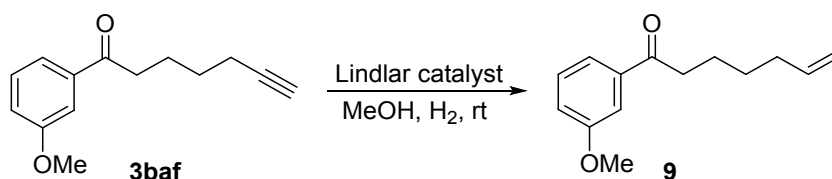

To a flask was added substrate **3baf** (64.9 mg, 0.3 mmol, 1.0 equiv), Lindlar catalyst (32 mg) and MeOH (8 mL). After the reaction mixture was stirred at room temperature for 8 h under 1.0 atm H<sub>2</sub>, the resulting mixture was filtered with a pad of celite. The filtrate was concentrated under reduced pressure and the residue was purified with a silica gel chromatography (petroleum ether:ethyl acetate = 20:1) to give product **9** as a colorless oil (95% yield).

## 4.2 Synthesis of Drugs

### Synthesis of 10 (Precursor of Fingolimod)

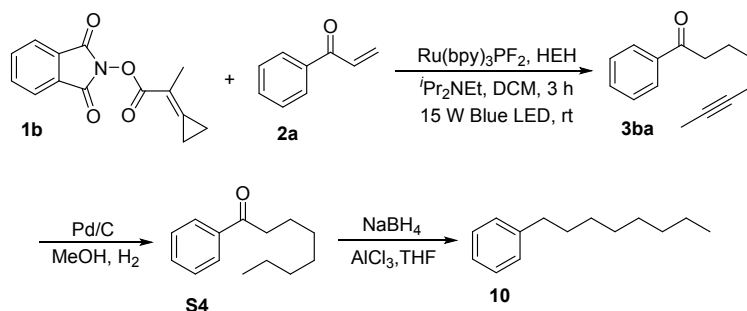

An oven-dried Schlenk tube (200 mL) was equipped with a magnetic stir bar, and substrates **1b** (3.09 g, 12.0 mmol, 1.5 equiv), **2a** (1.06 g, 8.0 mmol, 1.0 equiv), Ru(bpy)<sub>3</sub>(PF<sub>6</sub>)<sub>2</sub> (136.0 mg, 2 mol%), *i*Pr<sub>2</sub>NEt (2.23 g, 17.6 mmol, 2.2 equiv), Hantzsch ester (diethyl 2,6-dimethyl-1,4-dihydropyridine-3,5-dicarboxylate) (3.02 g, 12.0 mmol, 1.5 equiv) and DCM (120 mL) were added. The tube was degassed by alternating vacuum evacuation (10 min) and argon backfill three times. The tube was placed at a distance (app. 5 cm) from 15 W Blue LED, and the resulting yellow solution was stirred at ambient temperature under visible-light irradiation. When the reaction finished, the mixture was evaporated in *vacuo*. The crude products were directly purified by flash chromatography on silica gel (petroleum ether:ethyl acetate = 20:1) to give the desired products **3ba** (75% yield).

To a flask was added compound **3ba** (1.2 g, 6.0 mmol, 1.0 equiv), Pd/C (600 mg) and menthol (100 mL). After the reaction mixture was stirred at room temperature for 4 h under 1 atm H<sub>2</sub>, the resulting mixture was filtered. The filtrate was concentrated. The residue was purified by flash column chromatography (petroleum ether) on silica gel to give product **S4** as a colorless oil (98% yield).

An over-dried 20 mL round bottom flask containing a teflon-coated magnetic stir bar was charged with product **S4** (1.02 g, 5.0 mmol, 1.0 equiv), AlCl<sub>3</sub> (1.0 g, 15.0 mmol, 3.0 equiv) and THF (100 mL) under air. The flask was cooled to 0 °C with ice bath and NaBH<sub>4</sub> (0.57 g, 15.0 mmol, 3.0 equiv) was added within 1 hour. The reaction mixture was stirred for 2 h at 0 °C with ice bath and continued to be stirred for another 16 h at 65 °C in oil bath. After completion of reaction, the heterogeneous mixture was concentrated under reduced pressure. The residue was quenched in mixture of water (150 mL) and hydrochloric acid (25 mL) at room temperature. The layers were

separated and the water phase was extracted with toluene (50 mL) for three times. The combined organic layers were dried over anhydrous Na<sub>2</sub>SO<sub>4</sub> and concentrated under reduced pressure. The residue was purified by flash column chromatography (petroleum ether) on silica gel to give product **10** as a colorless liquid (65% yield).

### Synthesis of **13** and **14** (Anti-HIV-1 Activity)

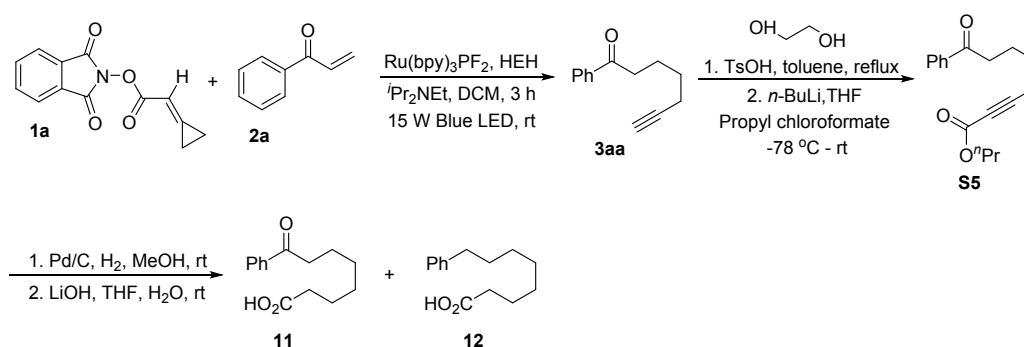

An oven-dried Schlenk tube (200 mL) was equipped with a magnetic stir bar, and substrate **1b** (2.90 g, 12.0 mmol, 1.5 equiv), **2a** (1.06 g, 8.0 mmol, 1.0 equiv), Ru(bpy)<sub>3</sub>(PF<sub>6</sub>)<sub>2</sub> (136.0 mg, 2 mol%), *i*Pr<sub>2</sub>NEt (2.28 g, 17.6 mmol, 2.2 equiv), Hantzsch ester (diethyl 2,6-dimethyl-1,4-dihydropyridine-3,5-dicarboxylate) (3.02 g, 12.0 mmol, 1.5 equiv) and DCM (120 mL) were added. The tube was degassed by alternating vacuum evacuation (10 min) and argon backfill three times. The tube was placed at a distance (app. 5 cm) from 15 W Blue LED, and the resulting yellow solution was stirred at ambient temperature under visible-light irradiation. When the reaction was finished up, the mixture was evaporated in *vacuo*. The crude product was directly purified by a flash chromatography on silica gel (petroleum ether:ethyl acetate = 20:1) to give the desired product **3aa** (60% yield).

To a flask was added compound **3aa** (838.2 mg, 4.5 mmol, 1.0 equiv), ethylene glycol (297.3 mg, 4.95 mmol, 1.1 equiv), *p*-toluenesulfonic acid (77.4 mg, 0.45 mmol, 0.1 equiv) and toluene (60 mL). After the reaction mixture was stirred at 110 °C in an oil bath and monitored by TLC analysis. The resulting mixture was concentrated in vacuum and washed with sodium bicarbonates. The mixture was extracted with EtOAc and the combined organics was dried over anhydrous Na<sub>2</sub>SO<sub>4</sub>. The solvent was evaporated and the residue was concentrated in vacuum to afford crude product as a colorless oil. To a solution of alkyne (4.5 mmol, 1.0 equiv) in THF (20 mL) was added dropwise, at -78 °C, a 1.0 M solution of *n*-BuLi (5.4 mL, 5.4 mmol, 1.2 equiv) in hexane. The reaction

mixture was stirred at -78 °C during 30 min and then the solution of propyl chloroformate (1.66 g, 13.5 mmol, 3.0 equiv) in THF (15 mL) was added in one portion. After being stirred for 30 min at -78 °C and overnight at room temperature, the reaction mixture was hydrolyzed with saturated solution of NH<sub>4</sub>Cl (30 mL) and extracted with Et<sub>2</sub>O (3 x 20 mL). The combined organic phases were washed with brine (50 mL), dried over anhydrous Na<sub>2</sub>SO<sub>4</sub>, filtered and concentrated under reduced pressure to afford crude product. The crude products were directly purified by a flash chromatography on silica gel (petroleum ether:ethyl acetate = 20:1) to give the desired product **S5** (91% yield).

To a solution of the product **S5** (1.73 g) in THF (80 mL) and water (80 mL) was added 1.0 M HCl (60 mL) and the solution was stirred at room temperature for 4 h. The reaction mixture was extracted with Et<sub>2</sub>O (3 x 40 mL). The combined organic phases were washed with brine (20 mL), dried over anhydrous Na<sub>2</sub>SO<sub>4</sub>, filtered and concentrated under reduced pressure to afford the crude product. To a flask was added the crude product, Pd/C (864 mg) and methanol (60 mL). After the reaction mixture was stirred at room temperature for overnight under 1.0 atm H<sub>2</sub>, the resulting mixture was filtered. The filtrate was concentrated under reduced pressure and the residue was dissolved in THF (50 mL), and lithium hydroxide (2.0 equiv) dissolved in distilled water (50 mL) was added to the THF solution. This mixture in the flask was stirred at room temperature and monitored by TLC analysis. After the ester was totally consumed, the reaction mixture was acidified with 20% hydrochloric acid aqueous solution. The aqueous solution was extracted with ether and the combined organics were dried over anhydrous Na<sub>2</sub>SO<sub>4</sub>. The solvent was evaporated and the residue was purified by a column chromatography on silica gel (petroleum ether:ethyl acetate = 1:1) to afford the corresponding carboxylic acids **11** and **12**.

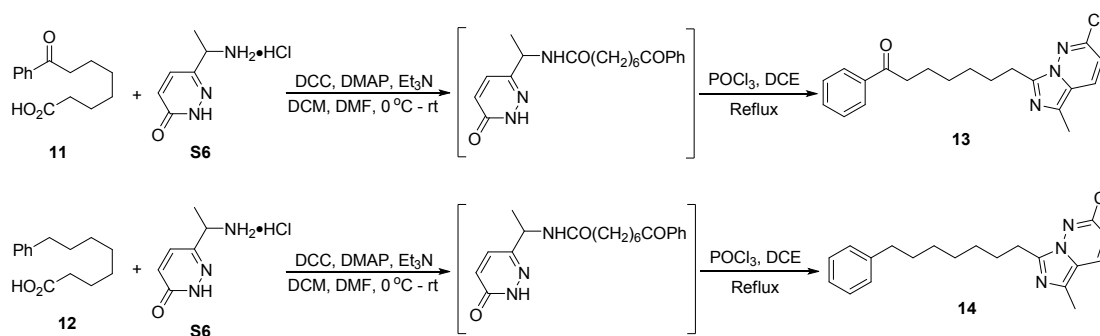

The 6-(1-aminoethyl)pyridazin-3(2*H*)-one (**S6**) was synthesized according to previously reported literature procedures and the analytic data were consistent with those in literature.<sup>9</sup>

An oven-dried 25 round bottom flask containing a teflon-coated magnetic stir bar was charged with the corresponding carboxylic acid (3.0 mmol, 1.0 equiv), **S6** (3.6 mmol, 1.2 equiv), DMAP (0.3 mmol, 0.1 equiv), Et<sub>3</sub>N (3.6 mmol, 1.2 equiv), DCM and DMF under nitrogen atmosphere. The flask was cooled to 0 °C with an ice bath and DCC (3.6 mmol, 1.2 equiv) in DCM was added dropwise. The resulted mixture was stirred at room temperature and monitored by TLC analysis. After the carboxylic acid was completely consumed, the heterogeneous mixture was filtered and the filtrate was washed with water and extracted with DCM (3 x 20 mL). The organic solutions were combined and dried over anhydrous Na<sub>2</sub>SO<sub>4</sub>. The solvent was concentrated under reduced pressure to afford the crude product. An oven-dried Schlenk tube (25 mL) was charged with a suspension of crude product in 1,2-dichloroethane (40 mL) and phosphoryl chloride (12.0 mmol, 4.0 equiv). The tube was heated to reflux with stirring for 3 h and then left at room temperature for 18 h. The resulting solution was evaporated, and the residual oil was suspended in ethyl acetate (50 mL). This suspension was cooled to 0 °C with an ice bath and quenched by sodium bicarbonate saturated solution. The aqueous phase was separated and extracted with ethyl acetate (2 x 20 mL). The organic solutions were combined and dried over anhydrous Na<sub>2</sub>SO<sub>4</sub>. The solvent was concentrated in vacuum and the residue was purified by a column chromatography on silica gel (petroleum ether:ethyl acetate = 1:1) to afford the corresponding products **13** and **14** in 64% and 62% yields.

### Synthesis of **25** (Precursor of Tramadol)

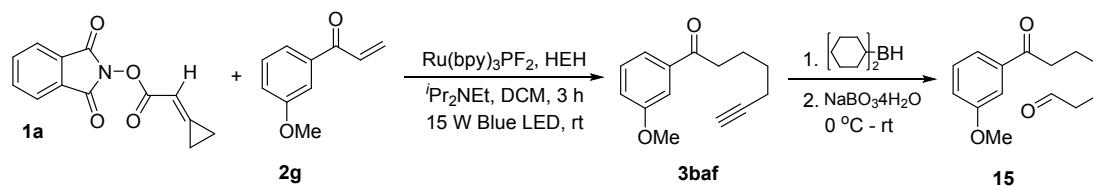

An oven-dried Schlenk tube (200 mL) was equipped with a magnetic stir bar, and substrate **1a** (2.91 g, 12.0 mmol, 1.5 equiv), alkene **2g** (1.30 g, 8.0 mmol, 1.0 equiv), Ru(bpy)<sub>3</sub>(PF<sub>6</sub>)<sub>2</sub> (136.0 mg, 2 mol%), <sup>t</sup>Pr<sub>2</sub>NEt (2.28 g, 17.6 mmol, 2.2 equiv), Hantzsch ester (diethyl 2,6-dimethyl-1,4-dihydropyridine-3,5-dicarboxylate) (3.02 g, 12.0 mmol, 1.5 equiv) and DCM (120 mL) were added. The tube was degassed by alternating vacuum evacuation (10 min) and argon backfill three times. The tube was placed at a distance (app. 5 cm) from 15 W Blue LED, and the resulting yellow solution was stirred at ambient temperature under visible-light irradiation. When the reaction was finished up, the mixture was evaporated in *vacuo*. The crude product was directly purified by a flash

chromatography on silica gel (petroleum ether:ethyl acetate = 20:1) to give the desired product **3baf** (68% yield).

BH<sub>3</sub>·THF (5.0 mL of a 1.0 M solution in THF, 5.0 mmol, 1.0 equiv) was placed in a dry, argon-flushed flask, which was then immersed in an ice-water bath. Cyclohexene (0.85 g, 10.0 mmol, 1.05 mL, 2.0 equiv) was added dropwise and the mixture was stirred at 0 °C with an ice bath for 1 h. Substrate **3baf** (811.0 mg, 5.0 mmol, 1.0 equiv) was then added to the slurry of dicyclohexylborane in THF. The cooling bath was removed and the reaction mixture was stirred for 1 h at room temperature. NaBO<sub>3</sub>·4H<sub>2</sub>O (1.38 g, 15.0 mmol, 3.0 equiv) and water (10 mL) was added to the mixture and stirred for 2 h at room temperature. The reaction mixture was extracted with ether (2 x 20 mL). The organic solutions were combined and dried over anhydrous Na<sub>2</sub>SO<sub>4</sub>. The solvent was concentrated in vacuum and the residue was purified by a column chromatography on silica gel (petroleum ether:ethyl acetate = 10:1) to afford the desired product **15** in 76% yield.

### Synthesis of 16 (Precursor of THC/AEA Hybrid Ligands)

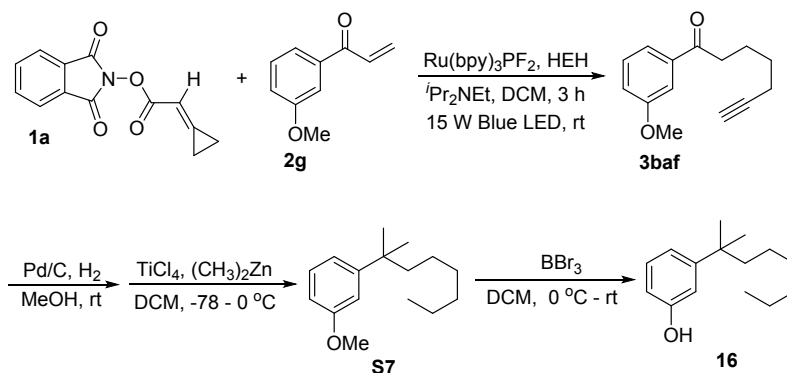

An oven-dried Schlenk tube (200 mL) was equipped with a magnetic stir bar, and substrate **1a** (2.91 g, 12.0 mmol, 1.5 equiv), alkene **2g** (1.30 g, 8.0 mmol, 1.0 equiv), Ru(bpy)<sub>3</sub>(PF<sub>6</sub>)<sub>2</sub> (136.0 mg, 2 mol%), iPr<sub>2</sub>NEt (2.28 g, 17.6 mmol, 2.2 equiv), Hantzsch ester (diethyl 2,6-dimethyl-1,4-dihydropyridine-3,5-dicarboxylate) (3.02 g, 12.0 mmol, 1.5 equiv) and DCM (120 mL) were added. The tube was degassed by alternating vacuum evacuation (10 min) and argon backfill three times. The tube was placed at a distance (app. 5 cm) from 15 W Blue LED, and the resulting yellow solution was stirred at ambient temperature under visible-light irradiation. When the reaction was finished up, the mixture was evaporated in *vacuo*. The crude product was directly purified by a flash chromatography on silica gel (petroleum ether:ethyl acetate = 20:1) to give the desired product **3baf** (67% yield).



To a flask was added the substrate **3baf** (1.08 g, 5.0 mmol, 1.0 equiv), Pd/C (550 mg) and methanol (60 mL). After the reaction mixture was stirred at room temperature for 4 h under 1.0 atm H<sub>2</sub>, the resulting mixture was filtered. The filtrate was concentrated under reduced pressure to afford the crude product. A 1.0 M solution of TiCl<sub>4</sub> (10.5 mL, 2.1 equiv) in CH<sub>2</sub>Cl<sub>2</sub> was added to CH<sub>2</sub>Cl<sub>2</sub> (60 mL) placed in a round bottom flask maintaining the temperature at -50 °C under N<sub>2</sub>. This reaction vessel was followed by addition of 1.0 M (CH<sub>3</sub>)<sub>2</sub>Zn (10.5 mL, 2.1 equiv) slowly. The orange-brown solution obtained was stirred vigorously at -50 °C for 1 hour after which a solution of the crude product (5.0 mmol, 1.0 equiv) in dry CH<sub>2</sub>Cl<sub>2</sub> (50 mL) was added dropwise. The reaction solution was allowed to stir for 2 h at -50 °C, then allowed to reach -10 °C before quenching by addition of ice-cold saturated NH<sub>4</sub>Cl solution dropwise. The reaction mixture was extracted with DCM (2 x 30 mL). The organic solutions were combined and dried over anhydrous Na<sub>2</sub>SO<sub>4</sub>. The solvent was concentrated in vacuum and the residue was purified by a column chromatography on silica gel (petroleum ether:ethyl acetate = 10:1) to afford product **S7** in 90% yield.

To a solution of BBr<sub>3</sub> (1.0 M in CH<sub>2</sub>Cl<sub>2</sub>, 3.3 mL, 3.3 mmol, 1.1 equiv) cooled to 0 °C with an ice bath was added a solution of substrate **S7** (3.0 mmol, 1.0 equiv) in CH<sub>2</sub>Cl<sub>2</sub> (25 mL) dropwise. The reaction was allowed to stir 12 h at room temperature. The reaction solution was cooled to 0 °C with an ice bath and water (10 mL) was added dropwise. The aqueous layer was then extracted with EtOAc, and the organic extracts were combined, dried and concentrated in *vacuo*. The residue was purified by a column chromatography on silica gel (petroleum ether:ethyl acetate = 4:1) to afford product **16** in 79% yield.

## 5. Mechanistic Studies

### 5.1 Cyclic Voltammetry Experiments

Cyclic Voltammetry was performed on a CH Instrument with an Electrochemical Workstation model CHI1220B. A solution of the sample in MeCN (0.001 M) was tested with 0.1 M Bu<sub>4</sub>NPF<sub>6</sub> as the supporting electrolyte, using a glassy carbon as the working electrode, a Pt as the counter electrode, and a saturated calomel electrode reference electrode. Scan rate = 0.1 V/s, 2 sweep segments, a sample interval of 0.001 V.

#### 5.1.1 Reductive Potential of Substrate

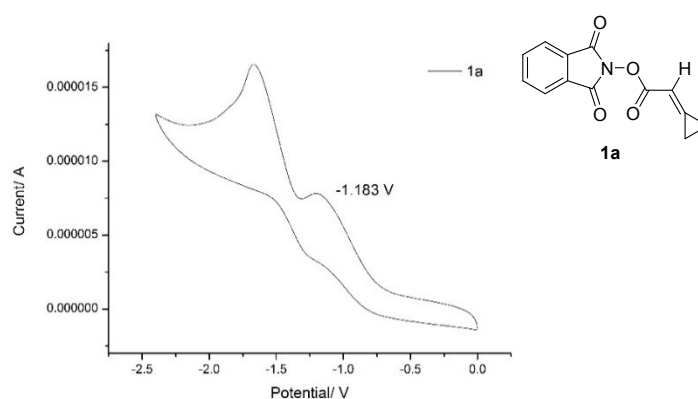

**Figure S1. Cyclic Voltammogram of 1a**

$$E_{p^{0/-1}}(\mathbf{1a}) = -1.18\text{V (vs SCE)}$$

#### 5.1.2 Reductive Potential of Radical Clock Substrate

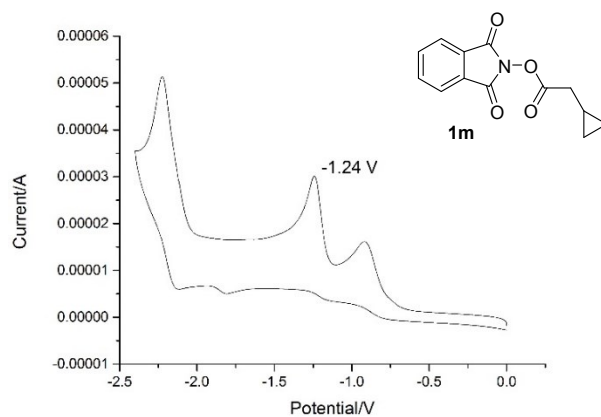

**Figure S2. Cyclic Voltammogram of Radical Clock**

$$E_{p^{0/-1}}(\mathbf{1m}) = -1.24\text{V (vs SCE)}$$

## 5.2 Stern-Volmer Fluorescence Quenching Experiments

Emission intensities were recorded using Varian Cary Eclipse spectrometer for all experiments. All  $\text{Ru}(\text{bpy})_3(\text{PF}_6)_2$  solutions were excited at 460 nm and the emission intensity was collected at 600 nm. In a typical experiment, the solution of  $\text{Ru}(\text{bpy})_3(\text{PF}_6)_2$  in DCM (15  $\mu\text{M}$ ) was added the appropriate amount of quencher in a screw-top 1.0 cm quartz cuvette. After degassing with nitrogen for 10 min, the emission spectra of the samples were collected.

The fluorescence intensity was measured in the presence of different four concentrations (5 mM, 10 mM, 15 mM, 20 mM of **1b**) to obtain a set of corresponding concentration fluorescence quenching spectra.

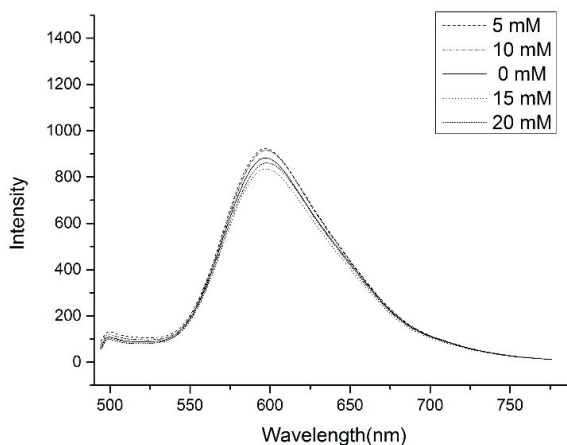

**Figure S3. Fluorescence quenching of  $\text{Ru}(\text{bpy})_3(\text{PF}_6)_2$  by various concentrations of **1b**.**

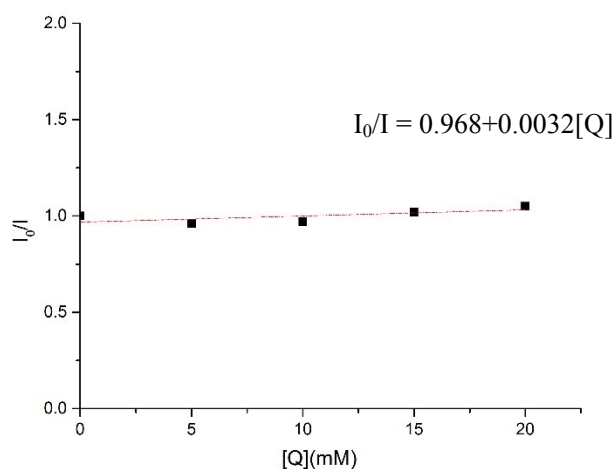

**Figure S4. Stern-Volmer plots for the fluorescence quenching of  $\text{Ru}(\text{bpy})_3(\text{PF}_6)_2$  by various concentrations of **1b**.**

### 5.3 Radical Trapping Experiment

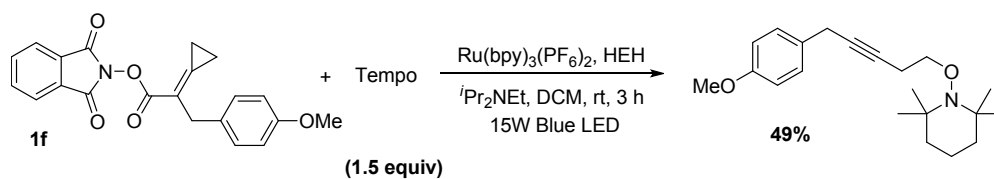

An oven-dried Schlenk tube (10 mL) was equipped with a magnetic stir bar, and substrate **1f** (0.1 mmol, 1.0 equiv), TEMPO (0.15 mmol, 1.5 equiv),  $\text{Ru}(\text{bpy})_3(\text{PF}_6)_2$  (1.7 mg, 2 mol%),  $i\text{Pr}_2\text{NEt}$  (0.22 mmol, 2.2 equiv), Hantzsch ester (0.15 mmol, 1.5 equiv) and DCM (1.5 mL) were added. The tube was degassed by alternating vacuum evacuation (10 min) and argon backfill three times. The tube was placed at a distance (app. 5 cm) from 15 W Blue LED, and the resulting yellow solution was stirred at ambient temperature for 3 hours under visible-light irradiation. When the reaction was finished up, the mixture was evaporated in *vacuo* and the crude product was directly purified by a flash chromatography on silica gel (petroleum ether:ethyl acetate = 20:1) to give the desired product **17** in 49% yield.

### 5.4 Deuterium Labeling Study

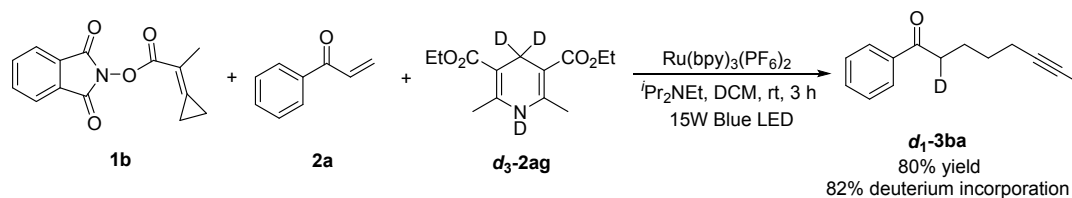

An oven-dried Schlenk tube (10 mL) was equipped with a magnetic stir bar, and substrate **1b** (0.15 mmol, 1.5 equiv), **2a** (0.1 mmol, 1.0 equiv),  $\text{Ru}(\text{bpy})_3(\text{PF}_6)_2$  (1.7 mg, 2 mol%),  $i\text{Pr}_2\text{NEt}$  (0.22 mmol, 2.2 equiv), 1,4,4-trideuterio-2,6-dimethyl-3,5-dicarboxy-1,4-dihydropyridine (0.15 mmol, 1.5 equiv) and DCM (1.5 mL) were added. The reaction tube was degassed by alternating vacuum evacuation (10 mins) and argon backfill three times. The tube was placed at a distance (app. 5 cm) from 15 W Blue LED, and the resulting yellow solution was stirred at ambient temperature for 3 hours under visible-light irradiation. When the reaction was finished up, the mixture was evaporated in *vacuo*. The crude product was directly purified by a flash chromatography on silica gel (petroleum ether:ethyl acetate = 20:1) to give the desired product in 80% yield with 82% deuterium incorporation.

## 5.5 Rate Measuring Experiment

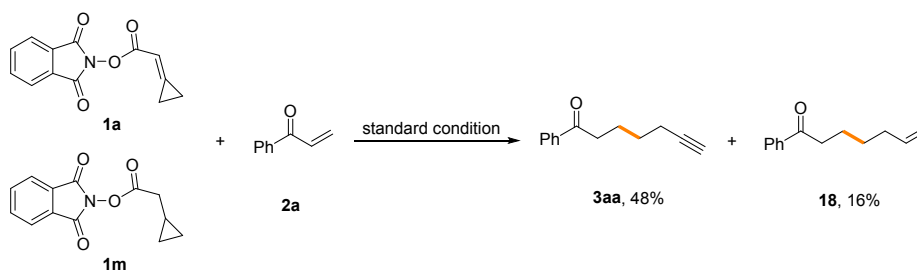

An oven-dried Schlenk tube (10 mL) was equipped with a magnetic stir bar, and substrate **1a** (0.15 mmol, 1.5 equiv), radical clock substrate **1m** (0.15 mmol, 1.5 equiv), **2a** (0.1 mmol, 1.0 equiv), Ru(bpy)<sub>3</sub>(PF<sub>6</sub>)<sub>2</sub> (1.7 mg, 2 mol%), <sup>i</sup>Pr<sub>2</sub>NEt (0.22 mmol, 2.2 equiv), Hantzsch ester (0.15 mmol, 1.5 equiv) and DCM (1.5 mL) were added. The reaction tube was degassed by alternating vacuum evacuation (10 min) and argon backfill three times. The tube was placed at a distance (app. 5 cm) from 15 W Blue LED, and the resulting yellow solution was stirred at ambient temperature for 3 hours under visible-light irradiation. When the reaction was finished up, the mixture was evaporated in *vacuo*. The crude product was directly purified by a flash chromatography on silica gel (petroleum ether:ethyl acetate = 20:1) to give the corresponding products **3aa** and **18** in 48% and 16% yield, respectively.

## 5.6 DFT Calculation

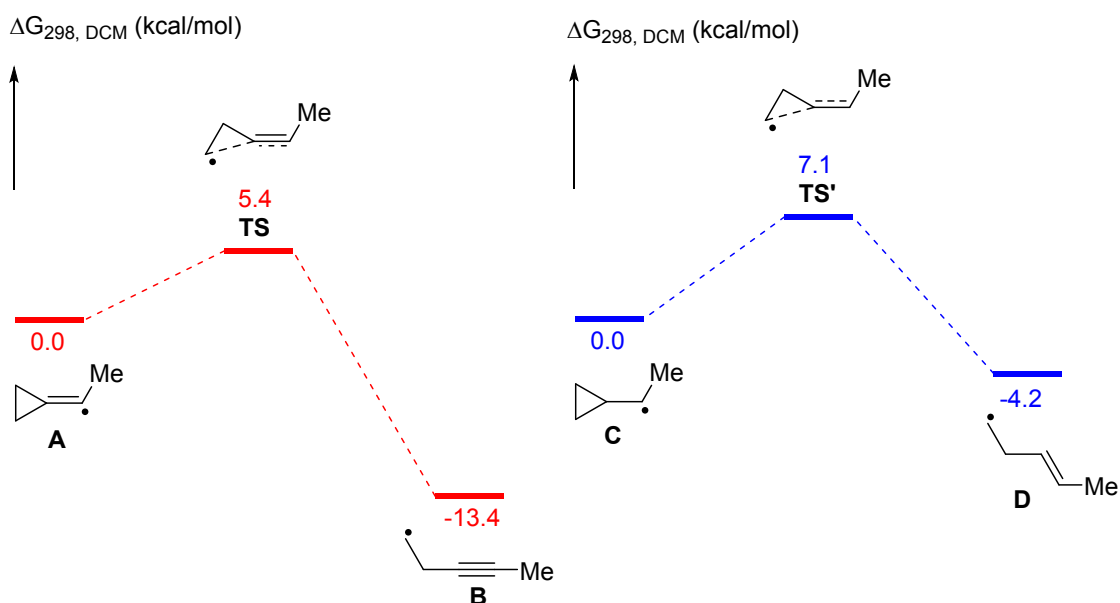

## **Computational methods**

All DFT calculations were performed with Gaussian 16 program. The geometries of all minima and transition states have been optimized at B3LYP/6-31G(d) level of theory. The subsequent frequency calculations on the stationary points were carried out at the same level of theory to ascertain the nature of the stationary points as minima or first-order saddle points on the respective potential energy surfaces. All transition states were characterized by one and only one imaginary frequency pertaining to the desired reaction coordinate. Thermochemical corrections to 298.15 K have been calculated for all minima from unscaled vibrational frequencies obtained at this same level. The solvent effect was estimated by the IEFPCM method with radii and nonelectrostatic terms for SMD solvation model in DCM ( $\epsilon = 8.93$ ). Solution-phase single point energy calculations were performed at B3LYP/6-311+G(d,p) level based on the gas phase optimized structures.

**Table S1.<sup>a</sup>**

|            | $E_{\text{tot}}$ ( $E_h$ ) | $H_{298, \text{DCM}}$ | $G_{298, \text{DCM}}$ |
|------------|----------------------------|-----------------------|-----------------------|
| <b>A</b>   | -194.6709033               | -194.5633859          | -194.5997509          |
| <b>TS</b>  | -194.6593820               | -194.5539814          | -194.5911144          |
| <b>B</b>   | -194.6860918               | -194.5797843          | -194.6210893          |
| <b>C</b>   | -195.9284328               | -195.7973513          | -195.8351513          |
| <b>TS'</b> | -195.9163422               | -195.7872011          | -195.8237891          |
| <b>D</b>   | -195.9330182               | -195.8029705          | -195.8417785          |

a. Calculated at SMD/B3LYP/6-311+G(d,p)//B3LYP/6-31G(d)

## Archive Entries

### A

```
1\1\GINC-OM103\SP\UB3LYP\6-311+G(d,p)\C5H7(2)\WEIY\25-Apr-2020\0\#\#p b
3lyp/6-311+g(d,p) geom=check scrf=(iefpcm,smd,solvent=dichloromethane)
\Title Card Required\0,2\C,0,-1.8015103967,-0.6361833559,0.064258800
8\C,0,-2.2365467733,-1.5471127388,0.8740878151\C,0,-3.1497441186,-1.94
65619175,1.9950045905\C,0,-2.1833857468,-2.942699694,1.3651627155\H,0,
-4.2121917862,-2.0519010189,1.7807282703\H,0,-2.9288125988,-1.57491281
47,2.9944698109\H,0,-1.3159285465,-3.2532021148,1.9464339871\H,0,-2.59
79285148,-3.7280184829,0.7340630175\C,0,-1.9898352882,0.7825796741,-0.
2887698836\H,0,-1.0611639168,1.3533400601,-0.1609574771\H,0,-2.2975005
751,0.8973786478,-1.3359395216\H,0,-2.7621436281,1.2545423554,0.340494
0444\Version=ES64L-G16RevA.03\State=2-A\HF=-194.6709033\S2=0.758941\S
2-1=0.\S2A=0.750053\RMSD=1.356e-09\Dipole=-0.3607419,0.1665972,0.31750
58\Quadrupole=-1.2548098,1.9123359,-0.6575261,0.3350373,0.4613617,-1.3
649166\PG=C01 [X(C5H7)]\@
```

### TS

```
1\1\GINC-OM103\SP\UB3LYP\6-311+G(d,p)\C5H7(2)\WEIY\25-Apr-2020\0\#\#p b
3lyp/6-311+g(d,p) geom=check scrf=(iefpcm,smd,solvent=dichloromethane)
\Title Card Required\0,2\C,0,-0.1820869968,-0.0147538332,0.006615427
4\C,0,0.0102837667,-0.0104361982,1.2383666907\C,0,1.4357259174,0.02299
895,2.4053925037\C,0,-0.0356710622,-0.0117805547,2.6876159398\H,0,1.96
53957617,0.9674985942,2.3910890209\H,0,2.0093314989,-0.8954760824,2.39
07043686\H,0,-0.4205599243,-0.922366571,3.1555320551\H,0,-0.4630501867
,0.8795171572,3.1557877765\C,0,0.1543835021,-0.0066244787,-1.417916646
1\H,0,-0.2367350485,-0.8983019254,-1.9241015681\H,0,-0.2776732425,0.86
61879864,-1.9236949111\H,0,1.242841954,0.0186601433,-1.5829089357\Ver
sion=ES64L-G16RevA.03\State=2-A\HF=-194.659382\S2=0.770218\S2-1=0.\S2A
```

=0.75015\RMSD=4.287e-09\Dipole=0.2643472,0.0062114,0.0409627\Quadrupole=-2.2483136,-0.8233953,3.0717089,-0.0333946,-0.8983769,-0.0217909\PG=C01 [X(C5H7)]\@

## B

1\1\GINC-OM103\SP\UB3LYP\6-311+G(d,p)\C5H7(2)\WEIY\25-Apr-2020\0\#\#p b 3lyp/6-311+g(d,p) geom=check scrf=(iefpcm,smd,solvent=dichloromethane)\Title Card Required\0,2\C,0,-1.1643686701,-0.0753328436,-0.000076691\C,0,0.0222967662,-0.3077481647,0.0056919704\C,0,1.4636863148,-0.576817536,0.0165875041\C,0,2.3183874938,0.6544390063,-0.0240100589\H,0,1.721815078,-1.2350159531,-0.8299942084\H,0,1.7109710847,-1.1783998195,0.9120739576\H,0,1.9036541945,1.630286331,0.1975654719\H,0,3.3902928363,0.5588625887,-0.1641975235\C,0,-2.5991452202,0.2019577226,-0.0093121625\H,0,-3.0759066488,-0.1207913743,0.9244847688\H,0,-2.7965865805,1.2745398386,-0.1273061246\H,0,-3.1014221687,-0.318375336,-0.8341760439\Version=ES64L-G16RevA.03\State=2-A\HF=-194.6860918\S2=0.753957\S2-1=0.\S2A=0.75001\RMSD=9.466e-09\Dipole=-0.1079042,-0.118712,0.0556939\Quadrupole=4.3900889,-1.5254448,-2.8646441,-1.8588216,0.074398,0.2454757\PG=C01 [X(C5H7)]\@

## C

1\1\GINC-OM103\SP\UB3LYP\6-311+G(d,p)\C5H9(2)\WEIY\26-Apr-2020\0\#\#p b 3lyp/6-311+g(d,p) geom=check scrf=(iefpcm,smd,solvent=dichloromethane)\Title Card Required\0,2\C,0,0.134629033,-0.359371202,0.1604717795\C,0,0.1472921956,0.4900231341,1.3526759139\C,0,0.6474061571,-0.0395360043,2.706916505\C,0,-0.8117926108,0.2354038238,2.5091073215\H,0,1.2278718034,0.6368409424,3.3295398524\H,0,0.9767560044,-1.0745148427,2.7415918378\H,0,-1.4856741009,-0.6124236676,2.4135376472\H,0,-1.2518843482,1.0983997723,3.0020364349\C,0,0.7687006648,0.051625622,-1.127770087\H,0,0.303297006,-0.4488019278,-1.9860368934\H,0,0.6915026756,1.1350541209,-1.2880999351\H,0,1.8458086512,-0.1942476509,-1.1693462076\H,0,-0.1716523224,-1.3975583165,0.2810378559\H,0,0.3822619095,1.5372062879,1.1658380581\Version=ES64L-G16RevA.03\State=2-A\HF=-195.9284328\S2=0.754784\S2-1=0.\S2A=0.750018\RMSD=8.669e-09\Dipole=0.1254539,0.0744258,0.09337\Quadrupole=-1.0348619,1.2617762,-0.2269144,0.3560136,-0.3938121,0.5948102\PG=C01 [X(C5H9)]\@

## TS'

1\1\GINC-OM103\SP\UB3LYP\6-311+G(d,p)\C5H9(2)\WEIY\26-Apr-2020\0\#\#p b 3lyp/6-311+g(d,p) geom=check scrf=(iefpcm,smd,solvent=dichloromethane)\ts\_radical\_me\0,2\C,0,-0.000426809,0.0004848037,0.0000011586\C,0,-0.0049308643,-0.0036794386,1.387354265\C,0,1.6591060229,-0.0043214638,2.3383145535\C,0,0.617637137,-1.0560228752,2.2477084607\H,0,1.6561871034,0.7195812521,3.144747514\H,0,2.501300969,-0.0098816115,1.6581538589\H,0,0.9076723422,-1.9648994576,1.7164986619\H,0,0.0836440952,-1.294715



6434, 3.1695492469\C, 0, -0.5527654532, 1.1131434462, -0.8374385516\H, 0, -1.2500417803, 0.7403977887, -1.6013312583\H, 0, -1.0899425079, 1.8470254245, -0.225567247\H, 0, 0.2383492218, 1.6547409312, -1.3803312464\H, 0, 0.501947081, -0.8146716256, -0.521435829\H, 0, -0.5912871061, 0.7527765463, 1.9047412799\\Version=ES64L-G16RevA.03\State=2-A\HF=-195.9163422\S2=0.775498\S2-1=0.\S2A=0.750138\RMSD=6.678e-09\Dipole=-0.0337968, 0.0171762, 0.071487\Quadrupole=-1.1893625, 0.1495133, 1.0398492, -0.7730911, -1.2218927, 0.3701099\PG=C01 [X(C5H9)]\@

#### D

1\\GINC-OM103\SP\UB3LYP\6-311+G(d,p)\C5H9(2)\WEIY\26-Apr-2020\0\\#p b 3lyp/6-311+g(d,p) geom=check scrf=(iefpcm, smd, solvent=dichloromethane) \\Title Card Required\\0, 2\C, 0, 0.0837105821, -0.2239641791, 0.0916425154\C, 0, 0.1606587526, -0.3268969716, 1.420931399\C, 0, 1.9450267421, 0.1526069475, 3.12094967\C, 0, 1.3532927157, -0.8530786394, 2.1832805365\H, 0, 2.4279354431, -0.1549121075, 4.0432509136\H, 0, 2.0234944791, 1.1948155289, 2.8272573204\H, 0, 2.1126184262, -1.1983528924, 1.4571948546\H, 0, 1.0649410226, -1.750196927, 2.7525617669\C, 0, -1.0974599097, 0.3052492949, -0.6707735845\H, 0, -1.4961381507, -0.4488695491, -1.3631349271\H, 0, -1.90727827, 0.6082405805, 0.0016829034\H, 0, -0.8206931471, 1.1752841273, -1.2818766902\H, 0, 0.9366145977, -0.5475985035, -0.5088887592\H, 0, -0.6837363585, 0.0010499748, 2.0299937023\\Version=ES64L-G16RevA.03\State=2-A\HF=-195.9330182\S2=0.753821\S2-1=0.\S2A=0.75001\RMSD=8.986e-09\Dipole=-0.0021368, -0.105179, -0.1681409\Quadrupole=-0.0636097, -0.735881, 0.7994907, -0.8724525, 0.3570413, -0.7953268\PG=C01 [X(C5H9)]\@

## 6. The Characterization Data of Substrates

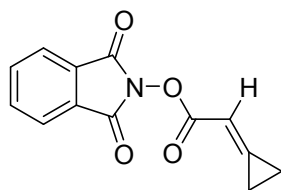

**1,3-dioxoisindolin-2-yl 2-cyclopropylideneacetate (1a)**: white solid, m.p. 185-186 °C, 531.6 mg, 63%, Eluent: PE/EA = 10/1.

**<sup>1</sup>H NMR** (400 MHz, CDCl<sub>3</sub>, TMS): δ 7.91 (dd, *J* = 5.6, 3.2 Hz, 2H), 7.80 (dd, *J* = 5.6, 3.2 Hz, 2H), 6.51 (p, *J* = 2.0 Hz, 1H), 1.64-1.58 (m, 2H), 1.45-1.39 (m, 2H). **<sup>13</sup>C NMR** (100 MHz, CDCl<sub>3</sub>, TMS): δ 3.4, 5.4, 106.0, 123.9, 129.0, 134.7, 153.2, 161.4, 162.2. **IR** (EtOH): ν 3092, 3000, 1798, 1732, 1718, 1489, 1356, 1283, 1185, 1131, 1029, 998, 875, 797, 694, 590 cm<sup>-1</sup>. **HRMS** (ESI) *m/z*: [M+Na]<sup>+</sup> Calcd. for C<sub>13</sub>H<sub>9</sub>NNaO<sub>4</sub> 266.0424; found 266.0429.

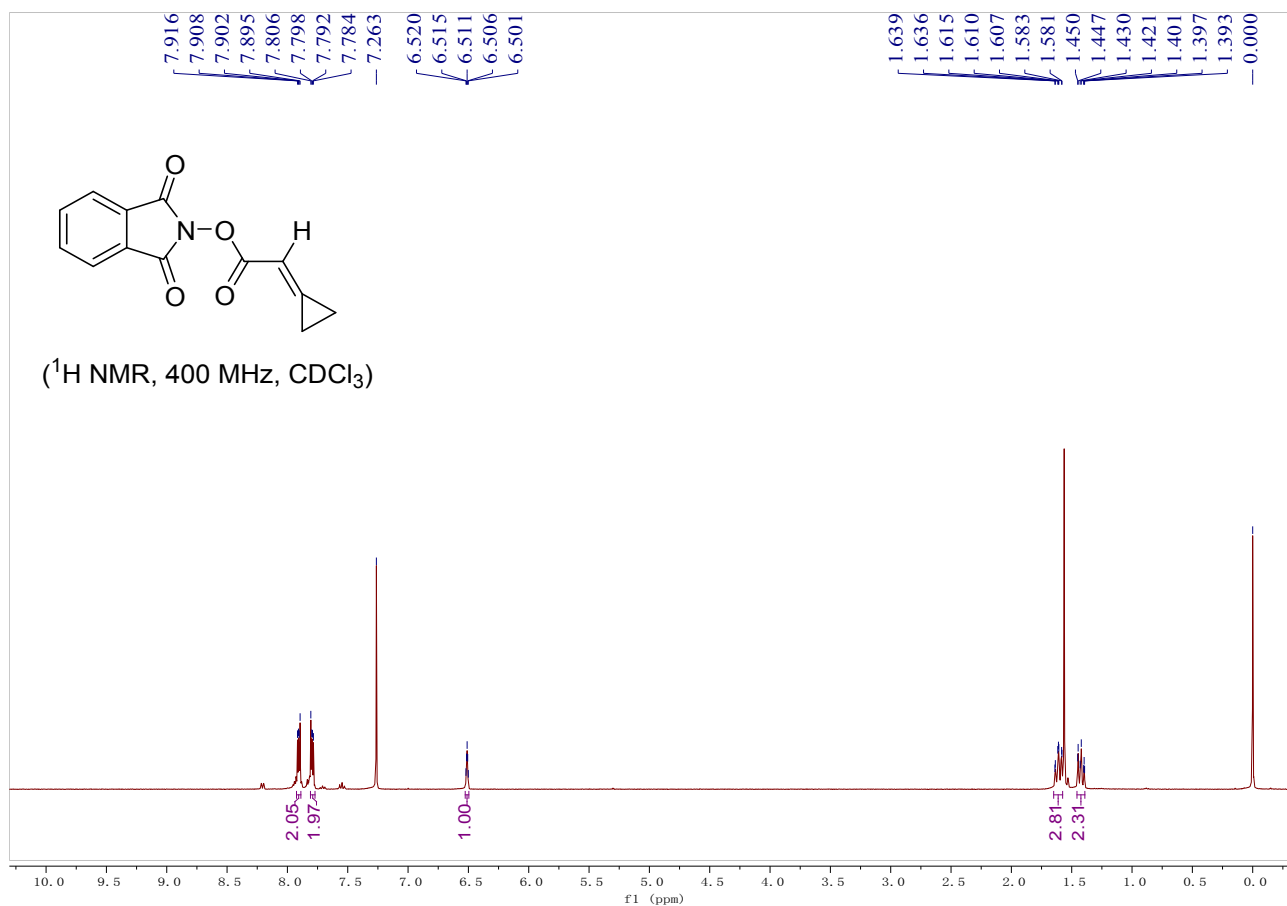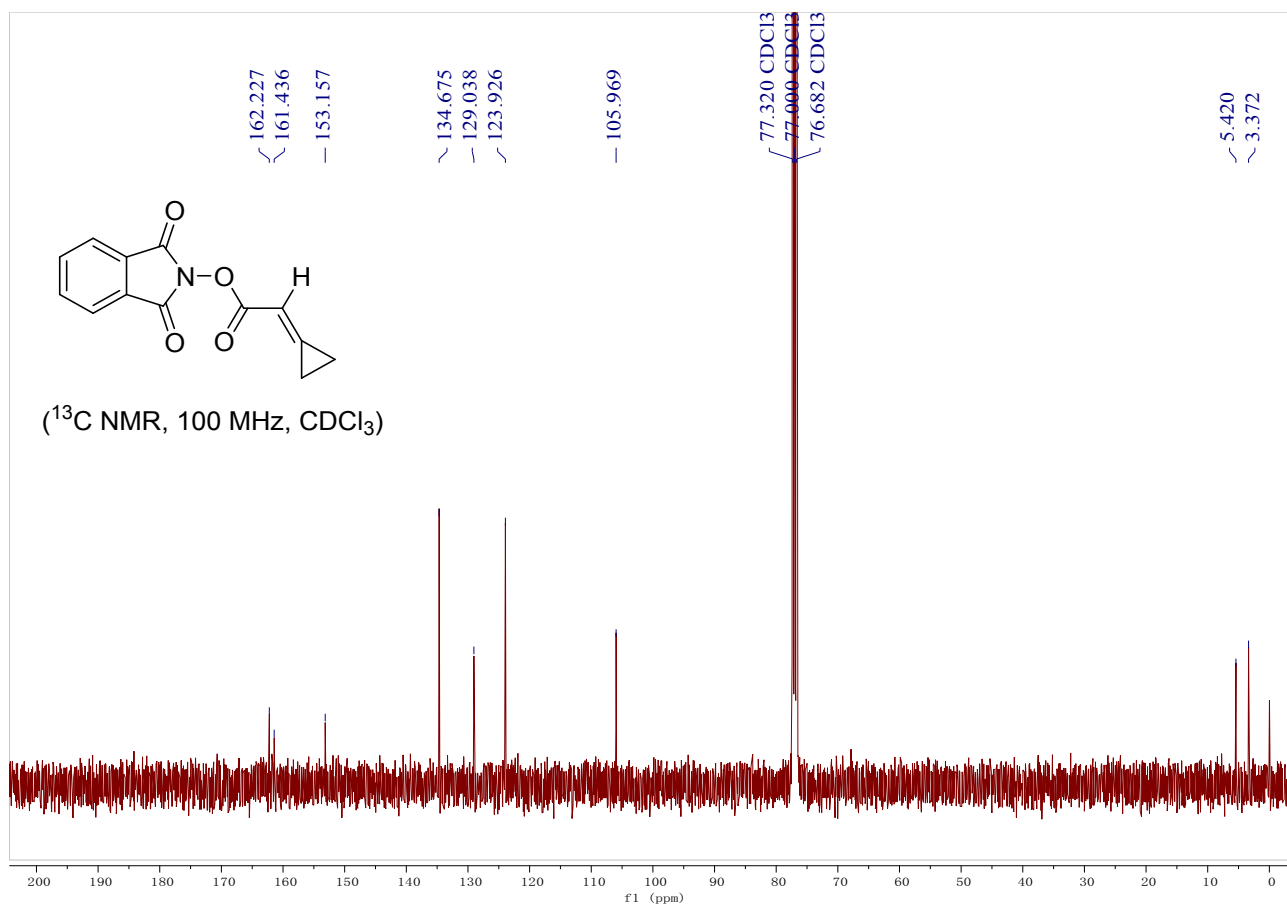

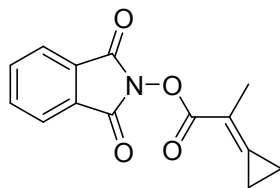

**1,3-Dioxoisindolin-2-yl 2-cyclopropylidenepropanoate (1b):** white solid, m.p. 190-192 °C, 561.8 mg, 73%, Eluent: PE/EA = 10/1.

**<sup>1</sup>H NMR** (400 MHz, CDCl<sub>3</sub>, TMS): δ 7.90 (dd, *J* = 5.6, 3.2 Hz, 2H), 7.79 (dd, *J* = 5.6, 3.2 Hz, 2H), 2.15 (s, 3H), 1.70-1.59 (m, 2H), 1.38-1.30 (m, 2H). **<sup>13</sup>C NMR** (100 MHz, CDCl<sub>3</sub>, TMS): δ 3.4, 6.8, 16.7, 114.1, 123.9, 129.1, 134.6, 145.0, 162.4, 162.9. **IR** (EtOH): ν 2988, 2965, 1763, 1742, 1554, 1370, 1249, 1185, 1079, 1003, 879, 837 cm<sup>-1</sup>. **HRMS** (ESI) *m/z*: [M+Na]<sup>+</sup> Calcd. for C<sub>14</sub>H<sub>11</sub>NNaO<sub>4</sub> 280.0580; found 280.0586.

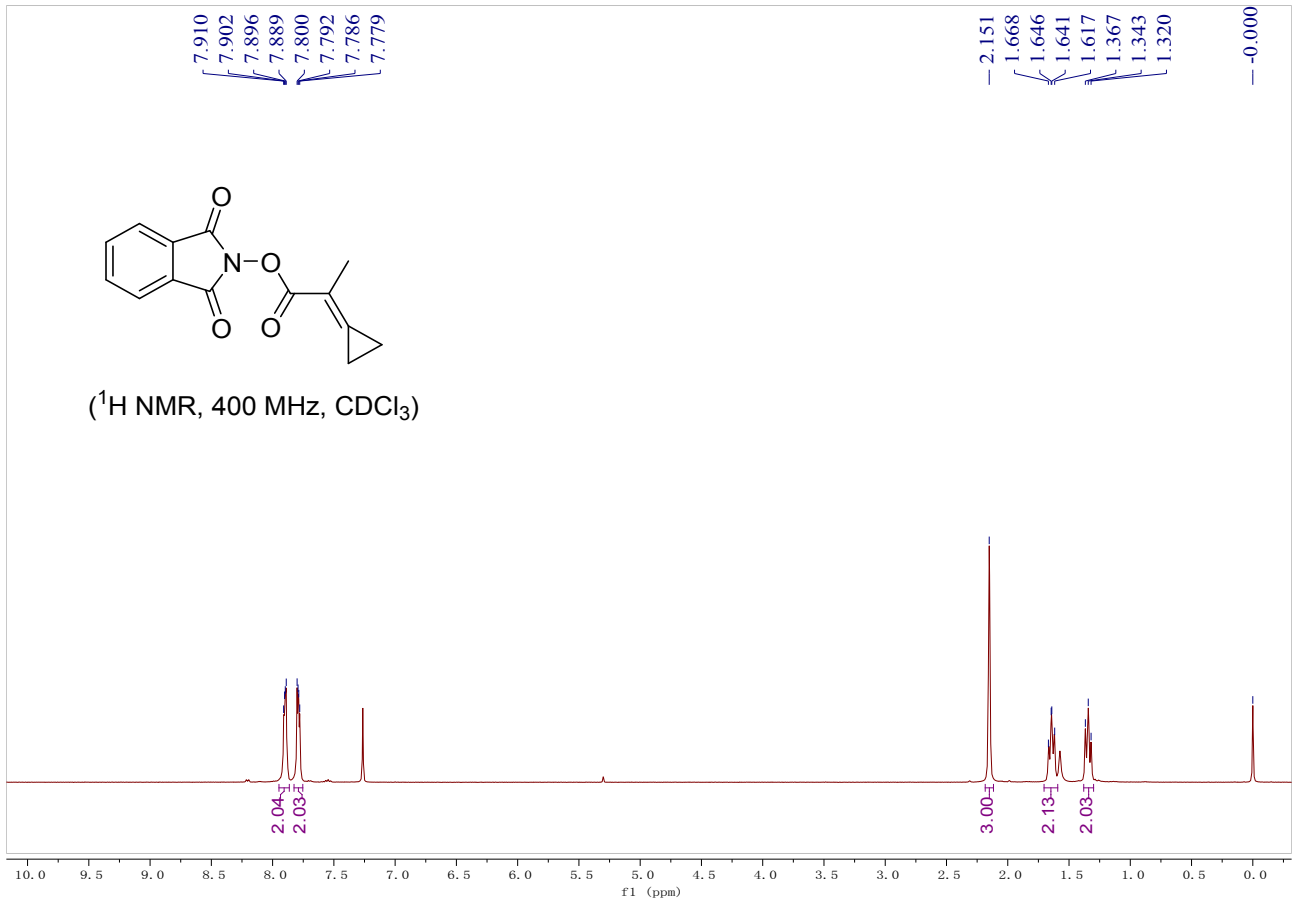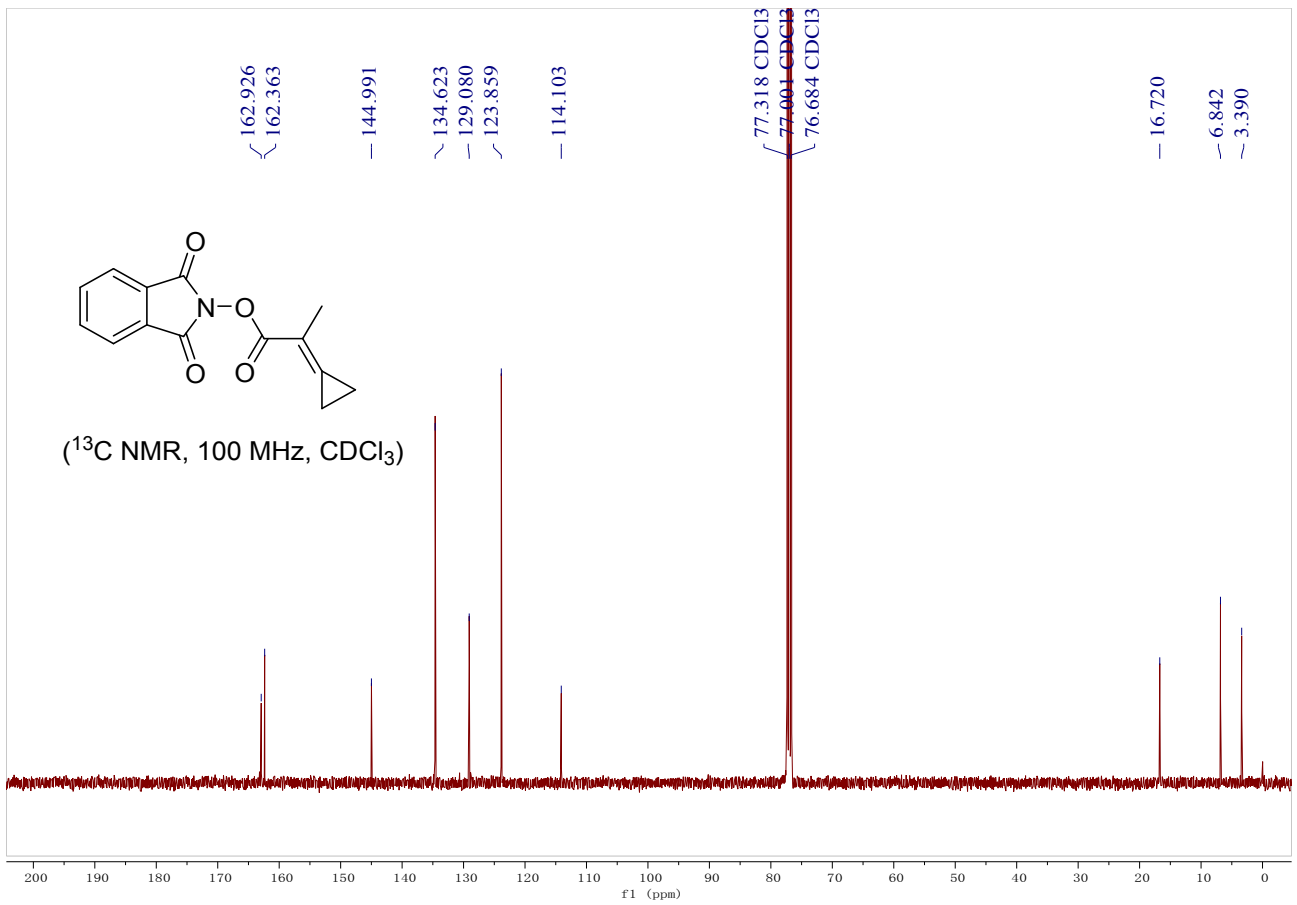

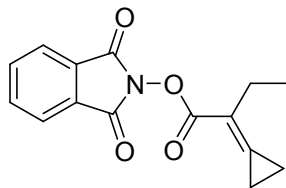

**1,3-Dioxoisindolin-2-yl 2-cyclopropylidenebutanoate (1c):** white solid, m.p. 179-180 °C, 463.5 mg, 85%, Eluent:PE/EA = 10/1.

**<sup>1</sup>H NMR** (400 MHz, CDCl<sub>3</sub>, TMS): δ 7.90 (dd, *J* = 5.6, 3.2 Hz, 2H), 7.79 (dd, *J* = 5.6, 3.2 Hz, 2H), 2.57 (q, *J* = 7.6 Hz, 2H), 1.62-1.55 (m, 2H), 1.45-1.36 (m, 2H), 1.20 (t, *J* = 7.6 Hz, 3H). **<sup>13</sup>C NMR** (100 MHz, CDCl<sub>3</sub>, TMS): δ 3.7, 5.6, 12.8, 24.7, 119.7, 123.8, 129.1, 134.6, 143.9, 162.4, 162.7. **IR** (EtOH): ν 2959, 2846, 1801, 1730, 1511, 1365, 1243, 1138, 1026, 998, 879, 700 cm<sup>-1</sup>. **HRMS** (ESI) *m/z*: [M+Na]<sup>+</sup> Calcd. for C<sub>15</sub>H<sub>13</sub>NNaO<sub>4</sub> 294.0737; found 294.0744.

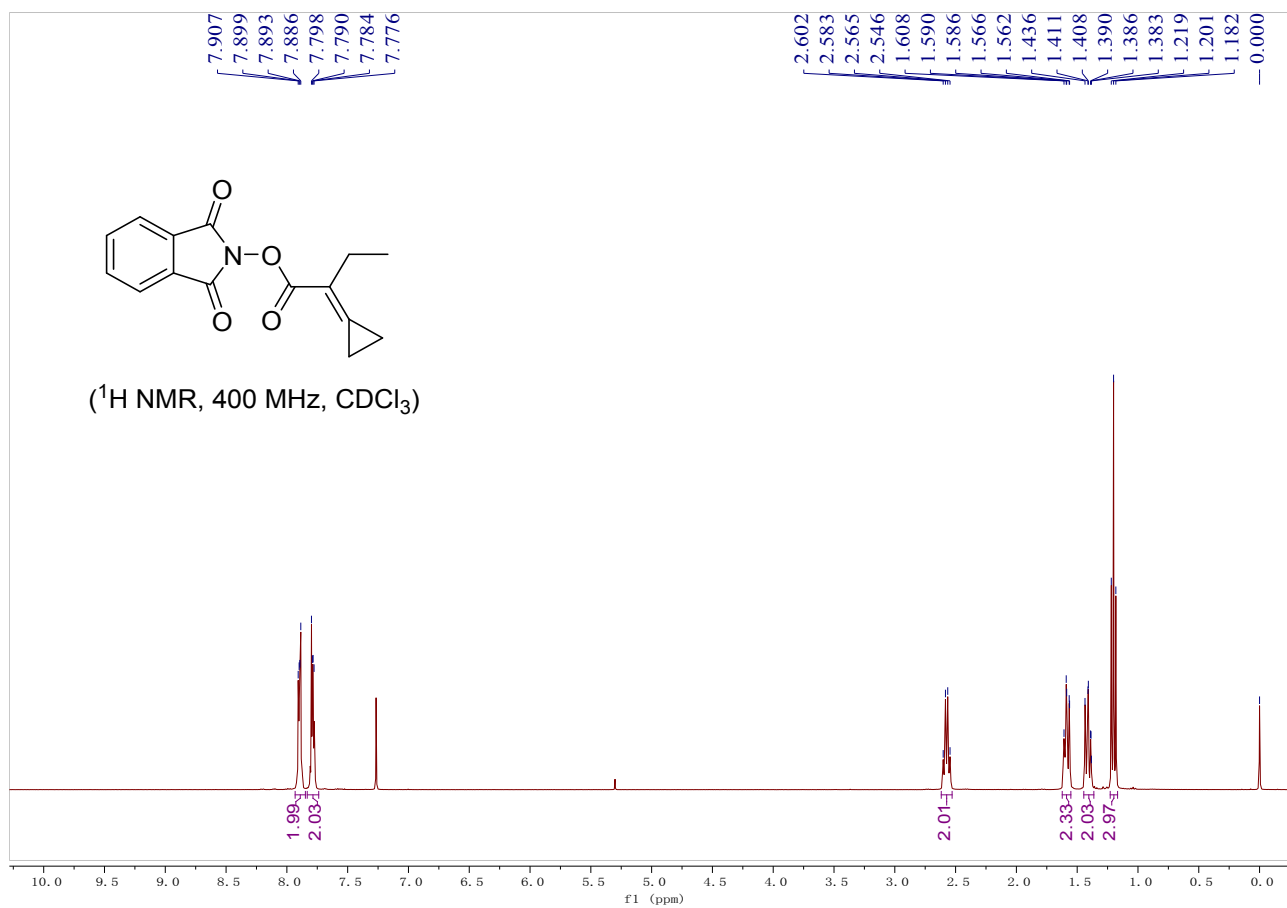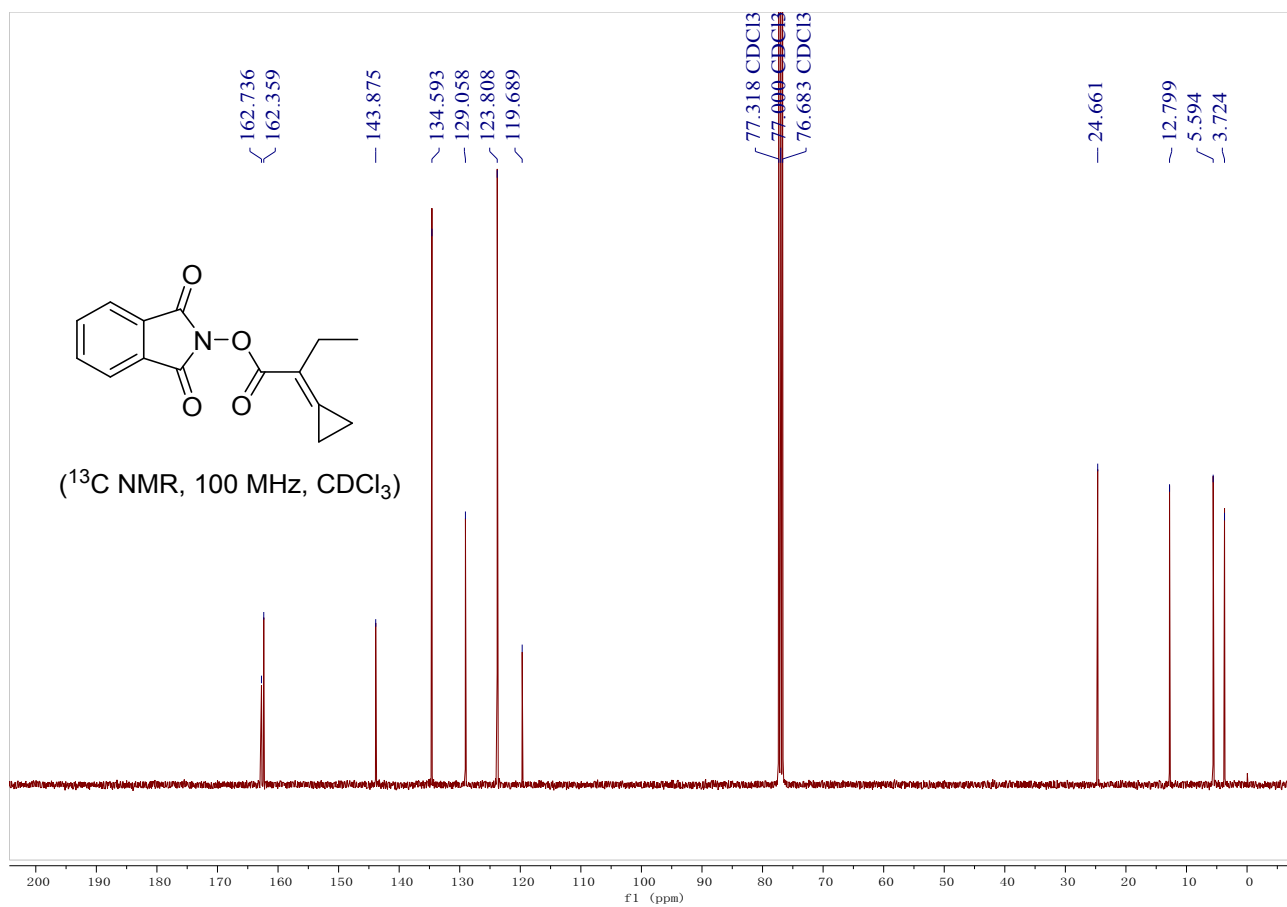

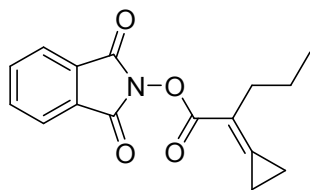

**1,3-Dioxoisindolin-2-yl 2-cyclopropylidenepentanoate (1d)**: white solid, m.p. 184-186 °C, 389.5 mg, 68%, Eluent: PE/EA = 10/1.

**<sup>1</sup>H NMR** (400 MHz, CDCl<sub>3</sub>, TMS): δ 7.89 (dd, *J* = 5.6, 3.2 Hz, 2H), 7.79 (dd, *J* = 5.6, 3.2 Hz, 2H), 2.51 (t, *J* = 7.6 Hz, 2H), 1.69-1.57 (m, 4H), 1.42-1.35 (m, 2H), 0.94 (t, *J* = 7.6 Hz, 3H). **<sup>13</sup>C NMR** (100 MHz, CDCl<sub>3</sub>, TMS): δ 3.8, 6.1, 13.8, 21.6, 33.2, 118.4, 123.8, 129.1, 134.6, 144.7, 162.4, 162.8. **IR** (EtOH): ν 3081, 2988, 2898, 1802, 1763, 1744, 1467, 1371, 1222, 1138, 1090, 983, 876, 787, 706 cm<sup>-1</sup>. **HRMS** (ESI) *m/z*: [M+Na]<sup>+</sup> Calcd. for C<sub>16</sub>H<sub>15</sub>NNaO<sub>4</sub> 308.0893; found 308.0900.



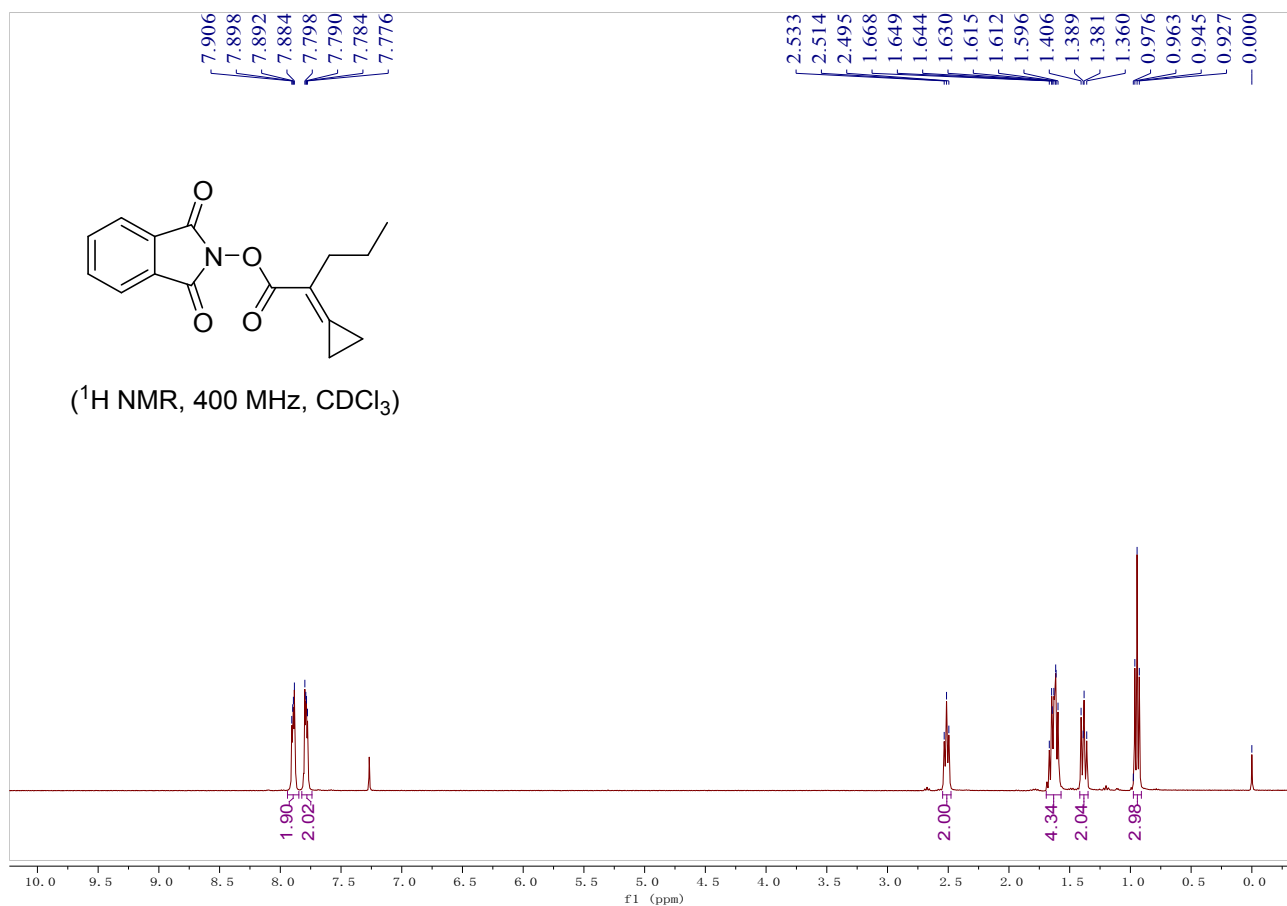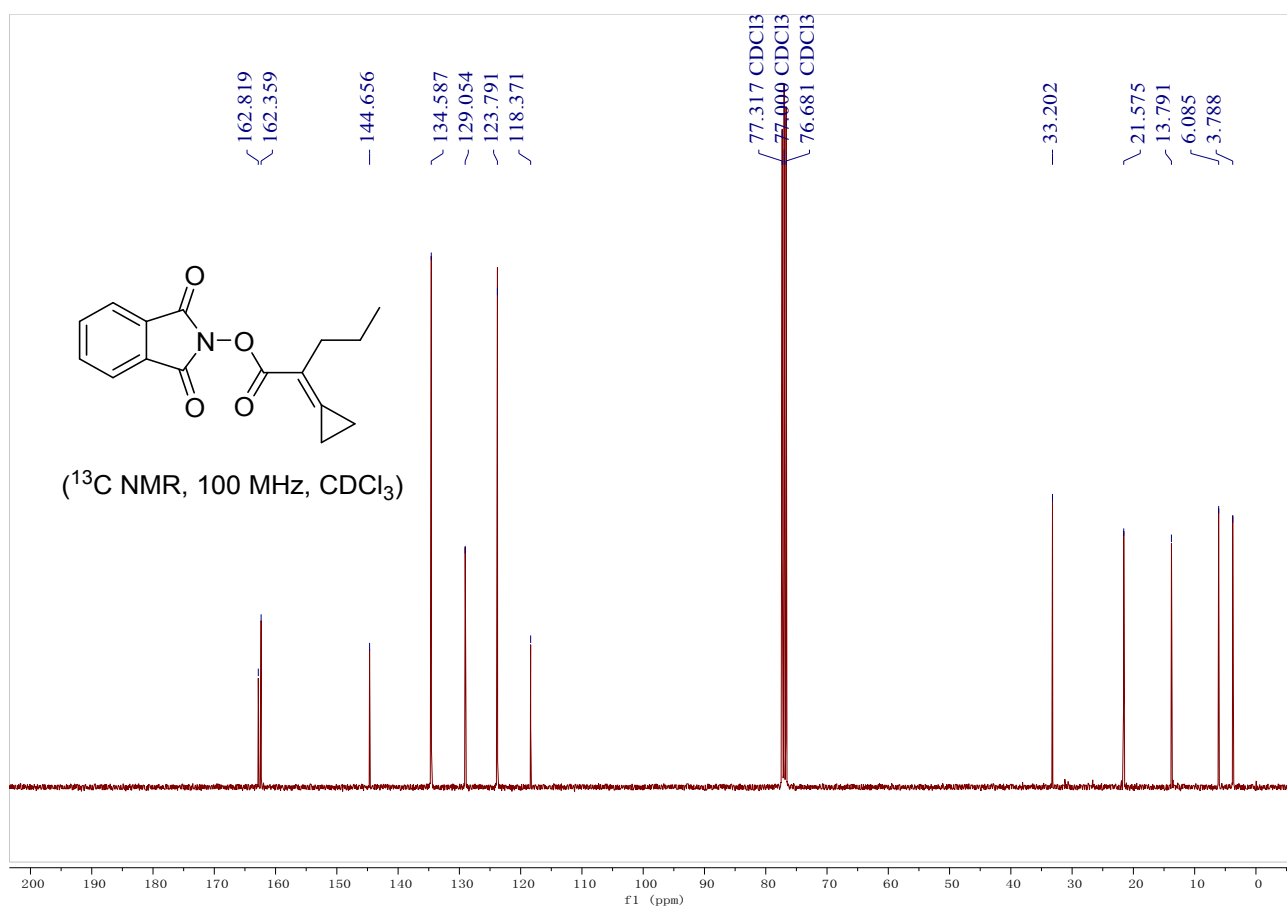

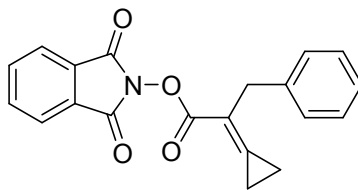

**1,3-Dioxoisindolin-2-yl 2-cyclopropylidene-3-phenylpropanoate (1e):** white solid, m.p. 182-183 °C, 539.5 mg, 81%, Eluent: PE/EA = 10/1.

**<sup>1</sup>H NMR** (400 MHz, CDCl<sub>3</sub>, TMS): δ 7.88 (dd, *J* = 5.6, 3.2 Hz, 2H), 7.78 (dd, *J* = 5.6, 3.2 Hz, 2H), 7.32-7.17 (m, 5H), 3.86 (s, 2H), 1.67-1.57 (m, 2H), 1.28-1.18 (m, 2H). **<sup>13</sup>C NMR** (150 MHz, CDCl<sub>3</sub>, TMS): δ 4.1, 6.2, 37.1, 117.8, 123.8, 126.4, 128.4, 129.0, 129.1, 134.6, 138.7, 146.6, 162.3, 162.7. **IR** (EtOH): ν 2950, 2923, 2837, 1801, 1745, 1373, 1273, 1165, 1132, 1079, 1024, 996, 877, 843, 789, 694, 683 cm<sup>-1</sup>. **HRMS** (ESI) *m/z*: [M+Na]<sup>+</sup> Calcd. for C<sub>20</sub>H<sub>15</sub>NNaO<sub>4</sub> 356.0893; found 356.0902.

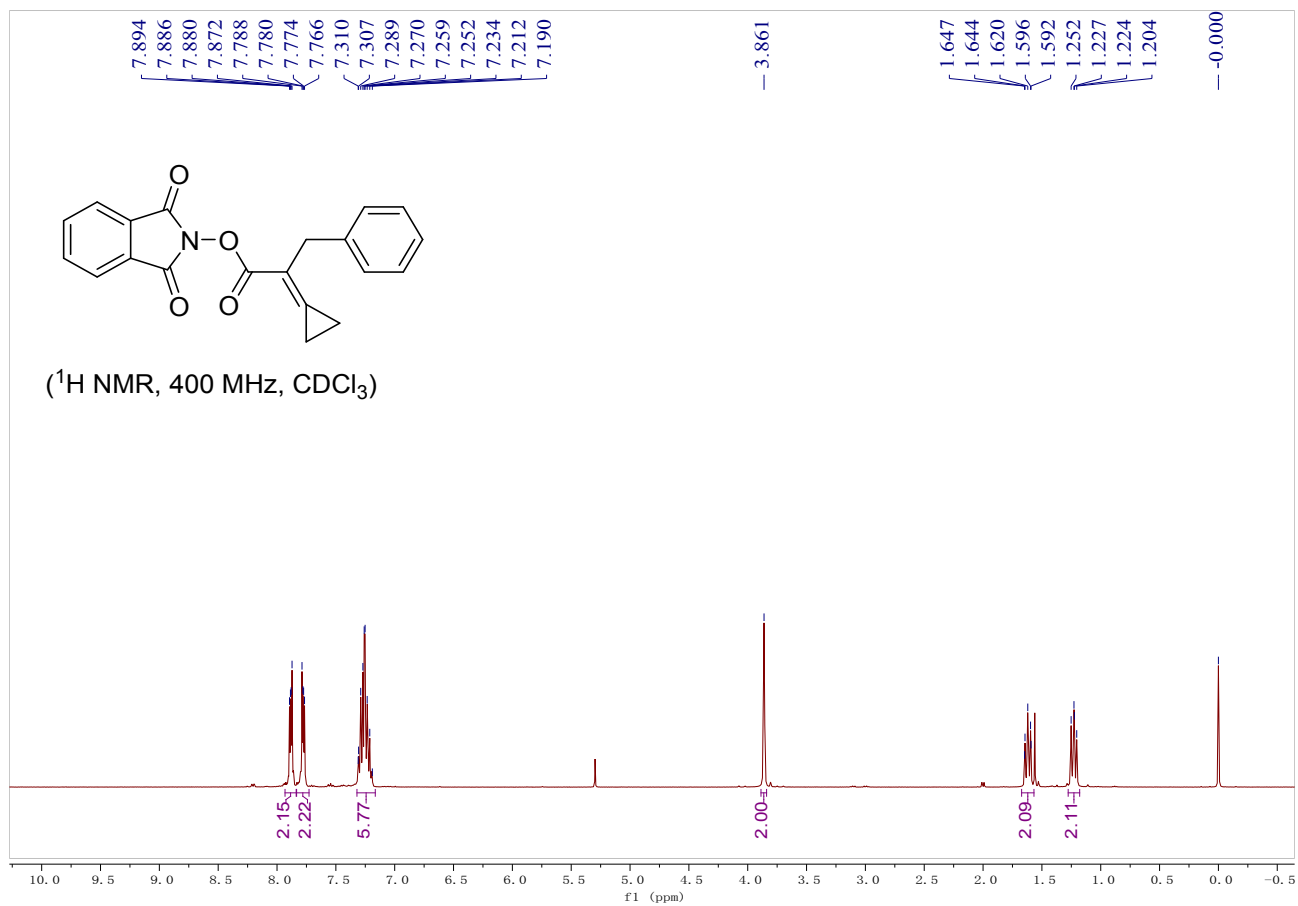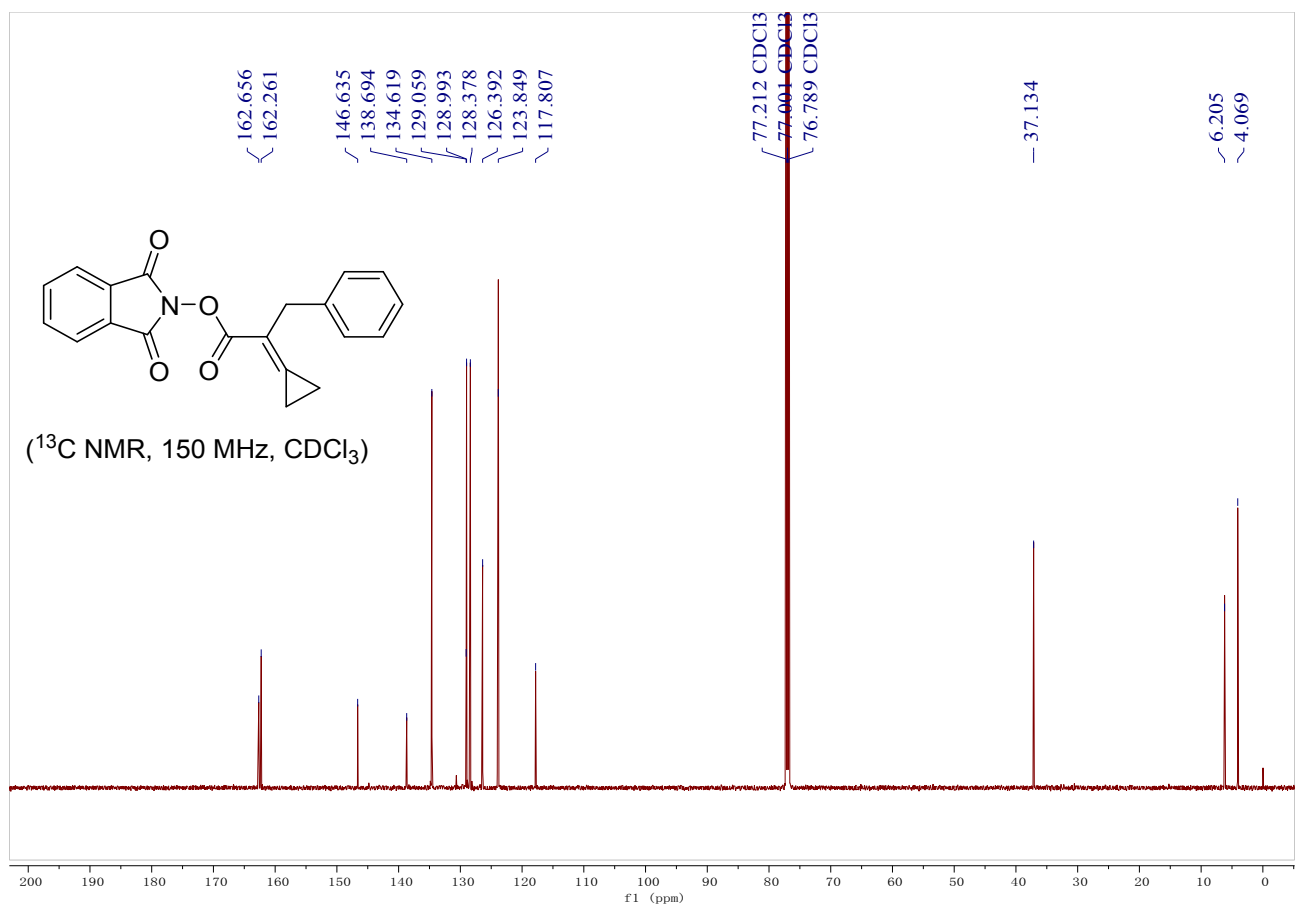

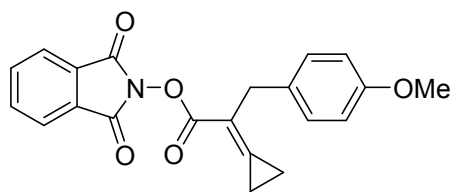

**1,3-Dioxoisindolin-2-yl 2-cyclopropylidene-3-(4-methoxyphenyl)propanoate (1f):** white solid, m.p. 182-184 °C, 321.1 mg, 45%, Eluent: PE/EA = 10/1.

**<sup>1</sup>H NMR** (400 MHz, CDCl<sub>3</sub>, TMS): δ 7.89 (dd, *J* = 5.6, 3.2 Hz, 2H), 7.78 (dd, *J* = 5.6, 3.2 Hz, 2H), 7.16 (d, *J* = 8.6 Hz, 2H), 6.83 (d, *J* = 8.6 Hz, 2H), 3.82-3.76 (m, 5H), 1.63-1.59 (m, 2H), 1.26-1.19 (m, 2H). **<sup>13</sup>C NMR** (150 MHz, CDCl<sub>3</sub>, TMS): δ 4.1, 6.1, 36.3, 55.2, 113.8, 118.1, 123.9, 129.1, 130.0, 130.8, 134.6, 146.3, 158.2, 162.3, 162.7. **IR** (EtOH): ν 2922, 2905, 1796, 1741, 1611, 1511, 1466, 1365, 1278, 1243, 1184, 1135, 1081, 1026, 999, 832, 700 cm<sup>-1</sup>. **HRMS** (ESI) *m/z*: [M+Na]<sup>+</sup> Calcd. for C<sub>21</sub>H<sub>17</sub>NNaO<sub>5</sub> 386.0999; found 386.1000.

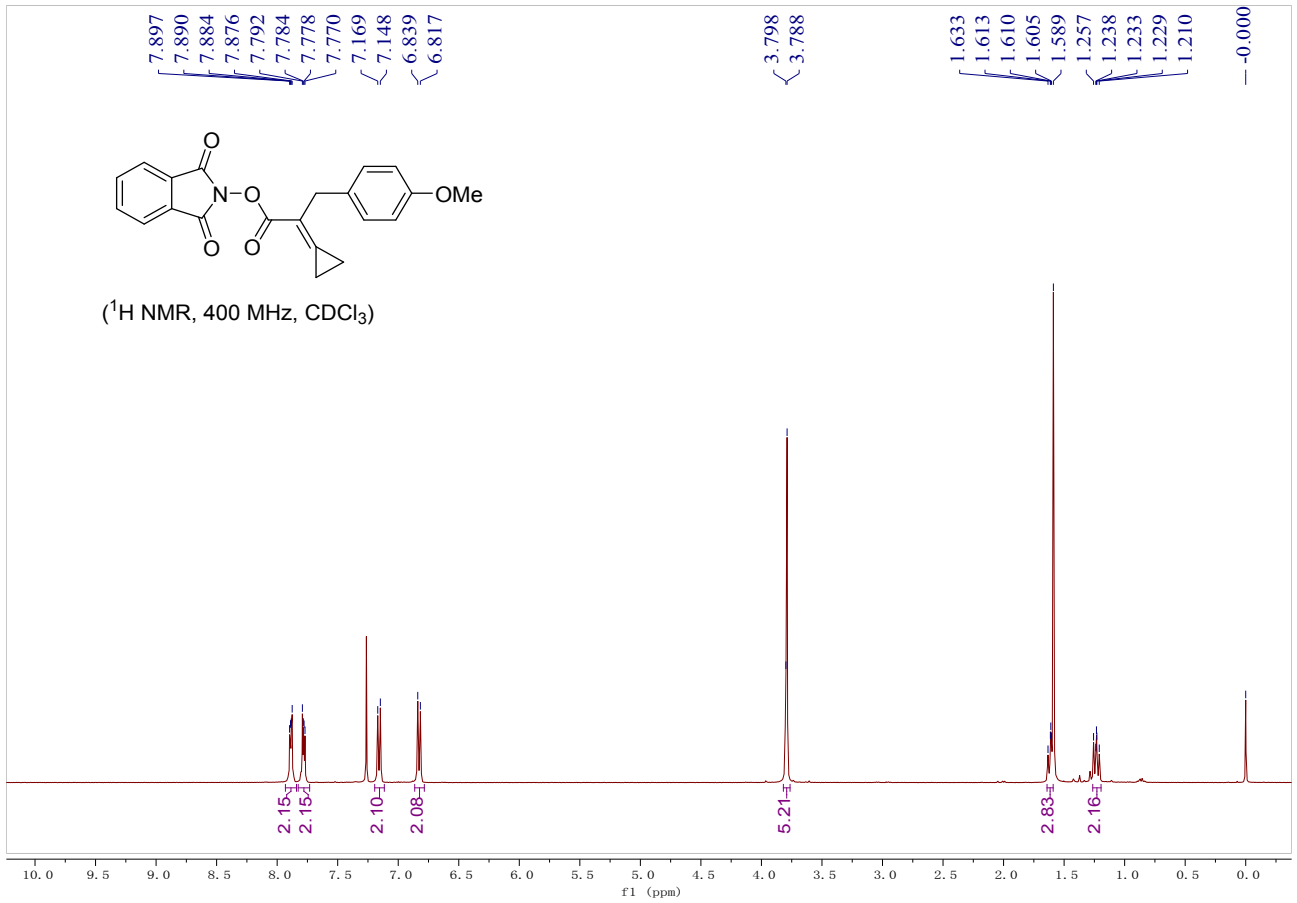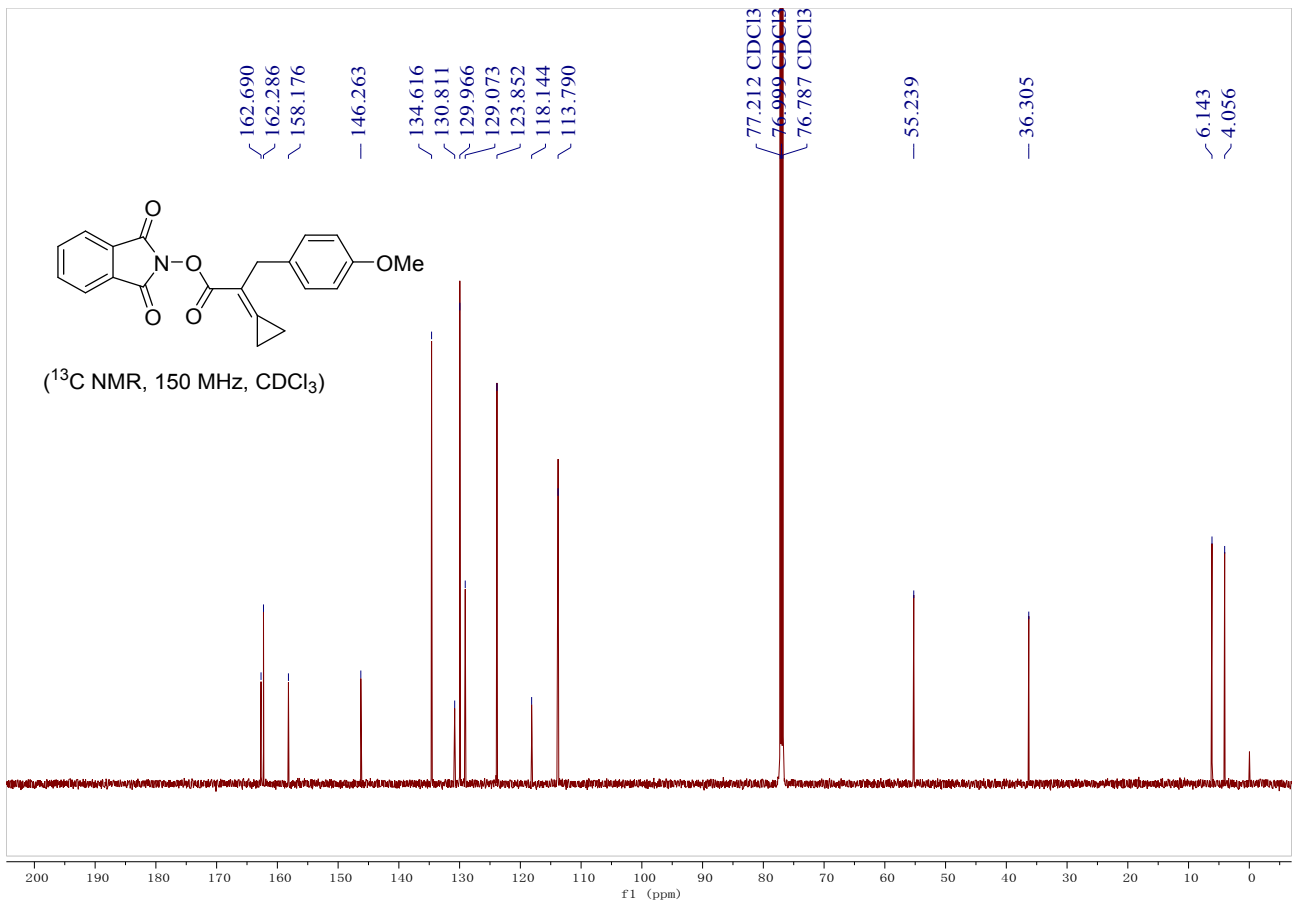

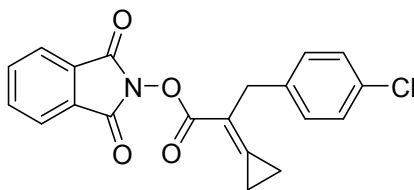

**1,3-Dioxoisindolin-2-yl 3-(4-chlorophenyl)-2-cyclopropylidenepropanoate (1g):** white solid, m.p. 183-184 °C, 389.4 mg, 53%, Eluent: PE/EA = 10/1.

**<sup>1</sup>H NMR** (400 MHz, CDCl<sub>3</sub>, TMS): δ 7.89 (dd, *J* = 5.6, 3.2 Hz, 2H), 7.78 (dd, *J* = 5.6, 3.2 Hz, 2H), 7.27-7.24 (m, 2H), 7.17 (d, *J* = 8.4 Hz, 2H), 3.82 (s, 2H), 1.69-1.59 (m, 2H), 1.30-1.20 (m, 2H). **<sup>13</sup>C NMR** (100 MHz, CDCl<sub>3</sub>, TMS): δ 4.1, 6.3, 36.5, 117.4, 123.9, 128.5, 129.0, 130.3, 132.2, 134.7, 137.1, 146.9, 162.2, 162.5. **IR** (EtOH): ν 3058, 2966, 1796, 1735, 1607, 1489, 1468, 1356, 1283, 1185, 1131, 1084, 1029, 998, 964, 921, 857, 727, 687 cm<sup>-1</sup>. **HRMS** (ESI) *m/z*: [M+Na]<sup>+</sup> Calcd. for C<sub>20</sub>H<sub>14</sub>NNaClO<sub>4</sub> 390.0504; found 390.0502.

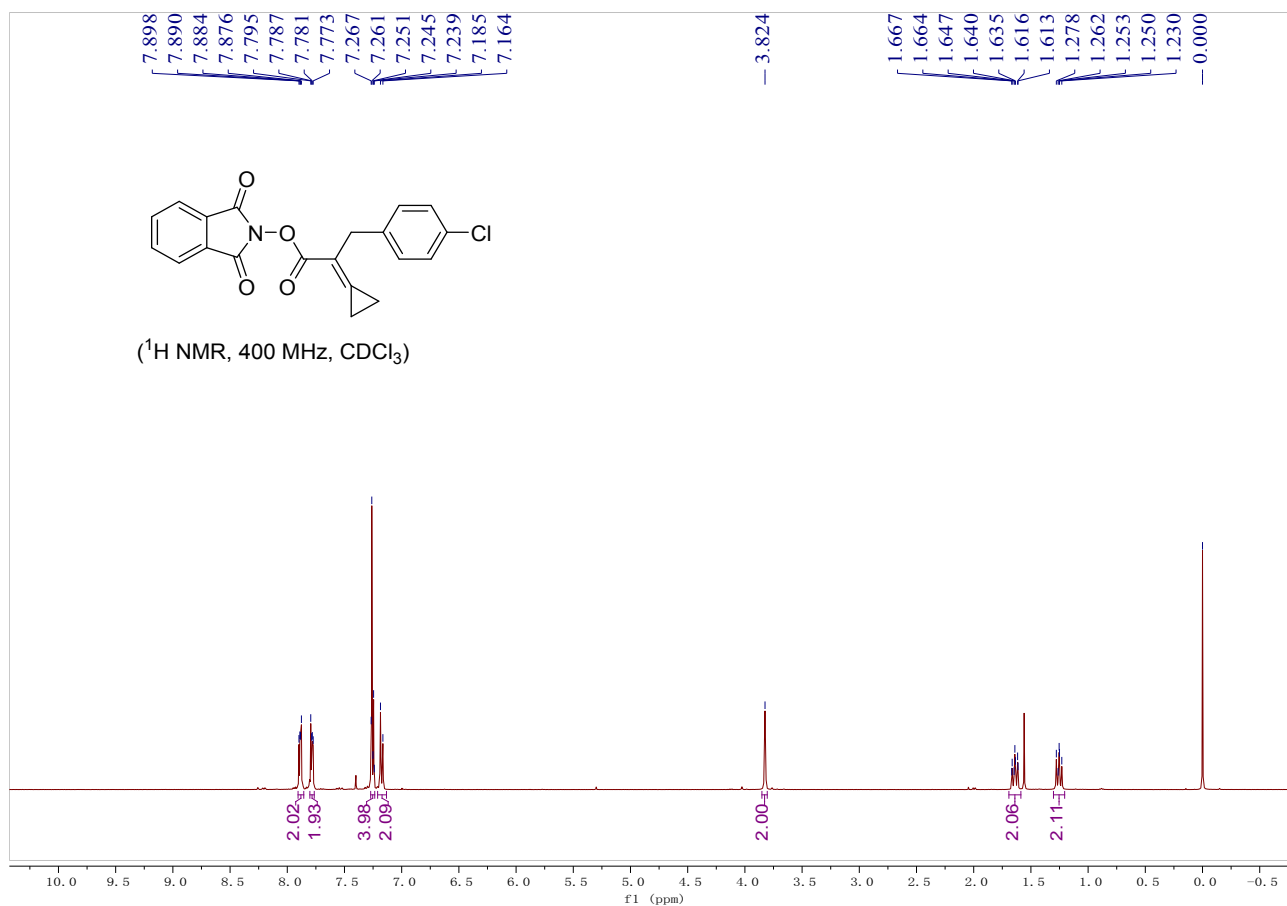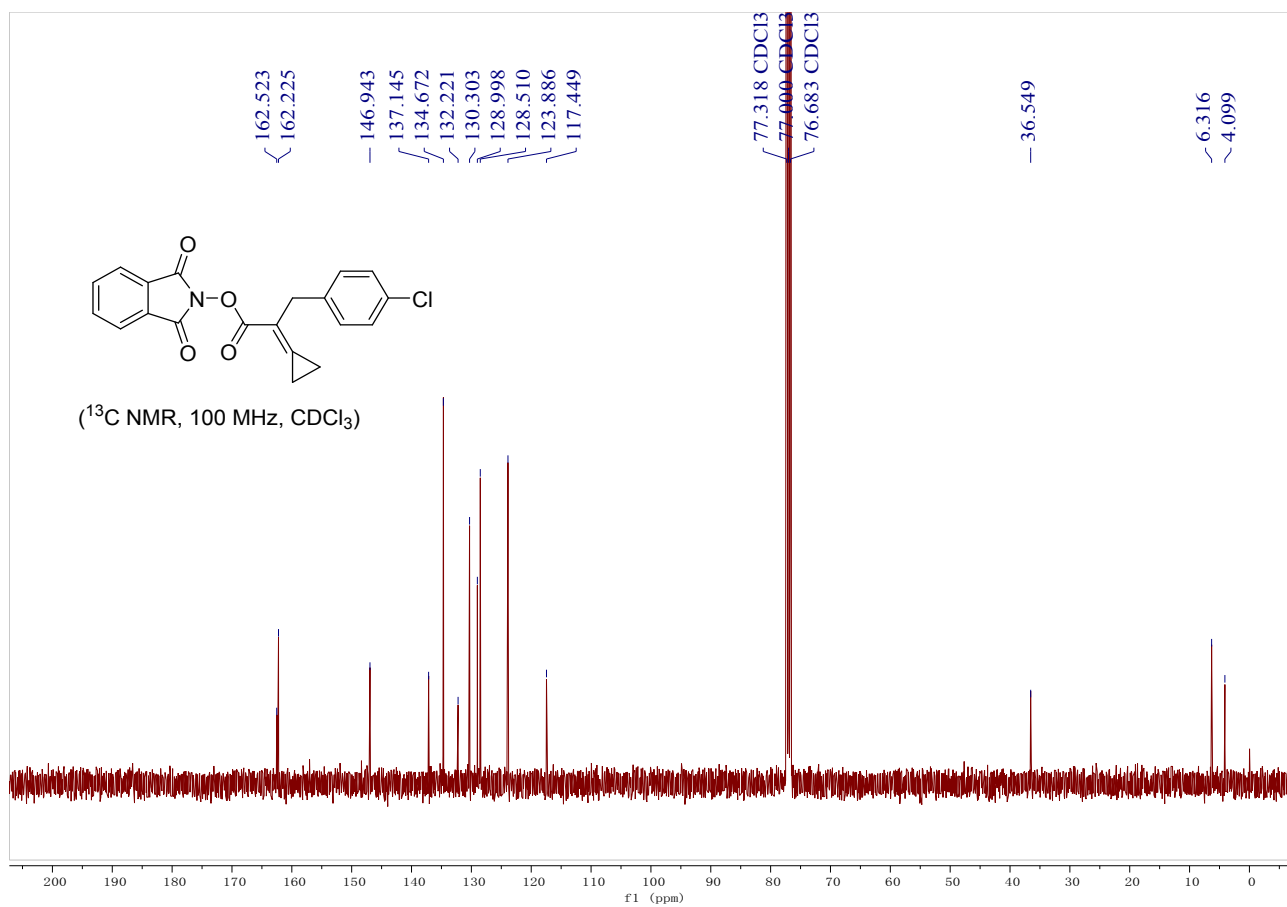

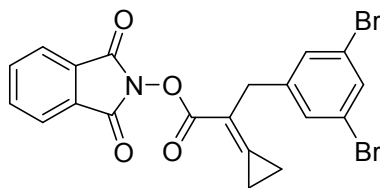

**1,3-dioxoisindolin-2-yl 2-cyclopropylidene-3-(3,5-dibromophenyl)propanoate (1h):** white solid, m.p. 193-194 °C, 618.8 mg, 63%, Eluent: PE/EA = 10/1.

**<sup>1</sup>H NMR** (400 MHz, CDCl<sub>3</sub>, TMS): δ 7.90 (dd, *J* = 5.6, 3.2 Hz, 2H), 7.79 (dd, *J* = 5.6, 3.2 Hz, 2H), 7.53 (t, *J* = 1.8 Hz, 1H), 7.33 (d, *J* = 1.8 Hz, 2H), 3.80 (s, 2H), 1.72-1.66 (m, 2H), 1.36-1.26 (m, 2H). **<sup>13</sup>C NMR** (150 MHz, CDCl<sub>3</sub>, TMS): δ 4.2, 6.5, 36.6, 116.7, 123.1, 123.9, 129.0, 130.3, 132.2, 134.7, 142.5, 147.8, 162.1, 162.3. **IR** (EtOH): ν 2988, 2901, 1756, 1742, 1550, 1374, 1250, 1185, 1078, 1057, 1003, 879, 740, 693 cm<sup>-1</sup>. **HRMS** (ESI) *m/z*: [M+Na]<sup>+</sup> Calcd. for C<sub>20</sub>H<sub>13</sub>NBr<sub>2</sub>O<sub>4</sub>Na 511.9104; found 511.9096.



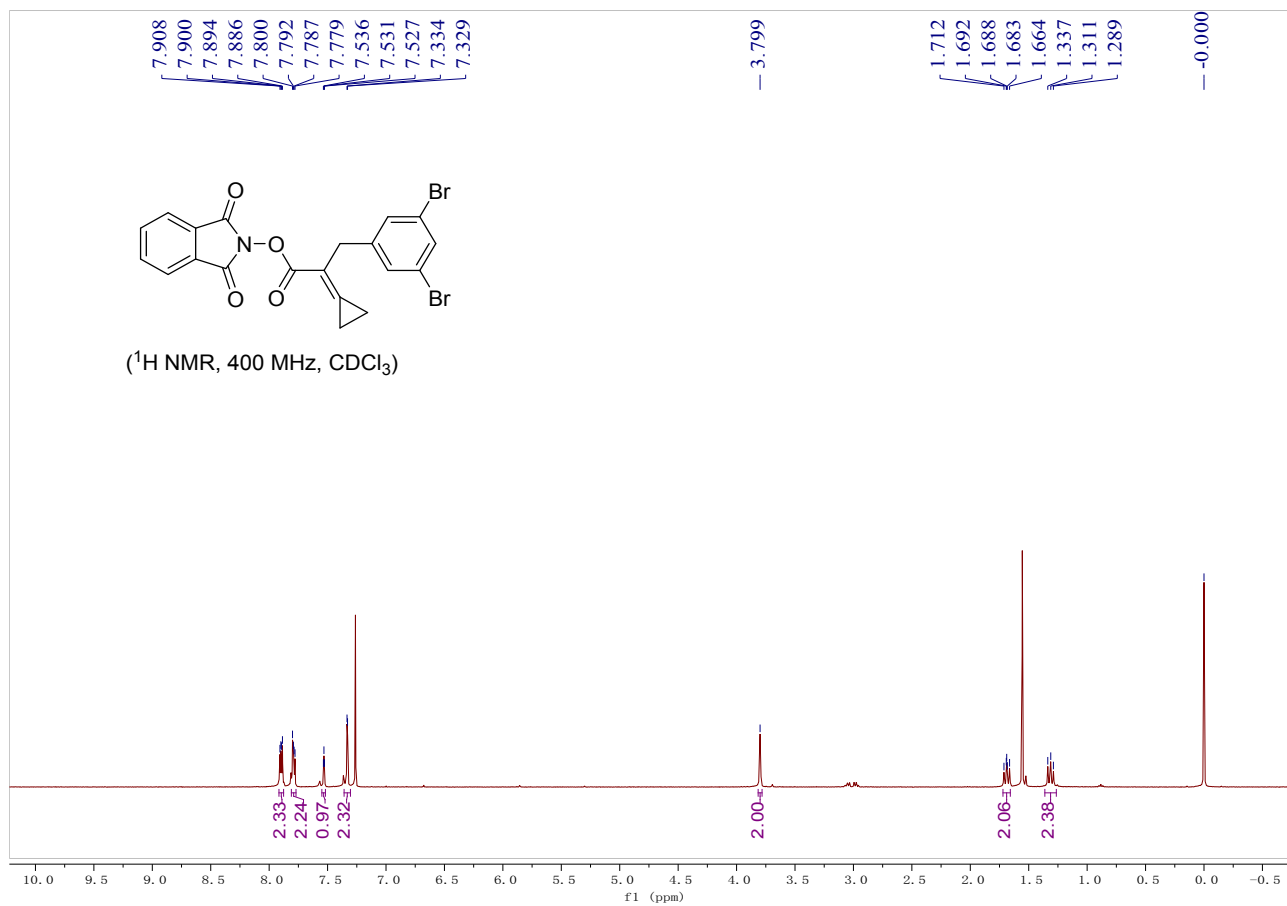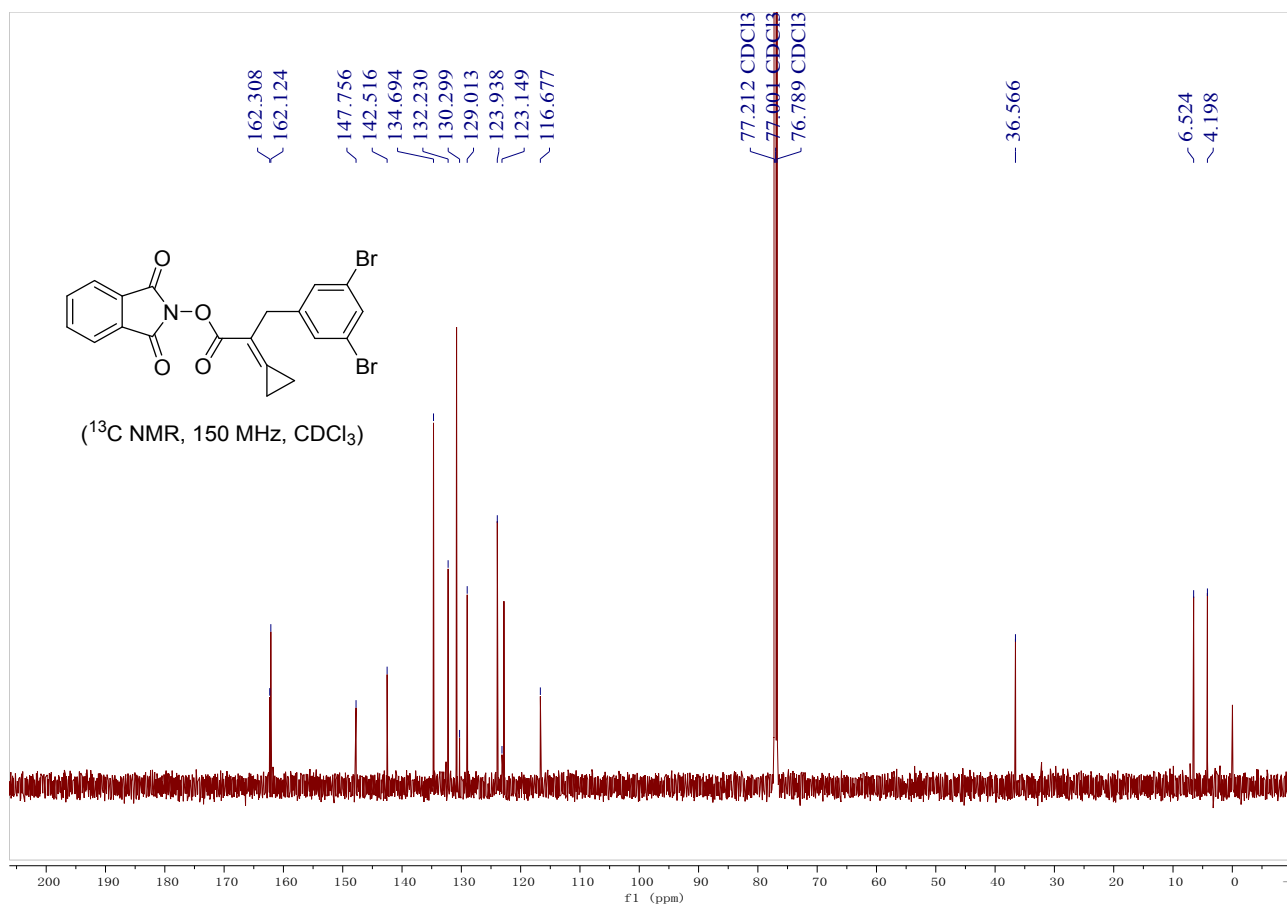

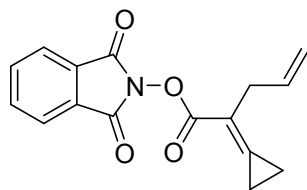

**1,3-Dioxoisindolin-2-yl 2-cyclopropylidenepent-4-enoate (1i):** white solid, m.p. 185-186 °C, 461.8 mg, 82%, Eluent: PE/EA = 10/1.

**<sup>1</sup>H NMR** (400 MHz, CDCl<sub>3</sub>, TMS): δ 7.89 (dd, *J* = 5.6, 3.2 Hz, 2H), 7.79 (dd, *J* = 5.6, 3.2 Hz, 2H), 5.96 (ddt, *J* = 16.8, 10.2, 6.6 Hz, 1H), 5.19-5.03 (m, 2H), 3.32-3.27 (m, 2H), 1.69-1.58 (m, 2H), 1.46-1.36 (m, 2H). **<sup>13</sup>C NMR** (150 MHz, CDCl<sub>3</sub>, TMS): δ 4.0, 6.1, 35.5, 116.4, 116.6, 123.8, 129.1, 134.5, 134.6, 145.9, 162.3, 162.5. **IR** (EtOH): ν 3099, 3069, 3045, 3024, 1804, 1760, 1751, 1602, 1467, 1371, 1222, 1185, 1084, 1016, 986, 968, 879, 748, 691 cm<sup>-1</sup>. **HRMS** (ESI) *m/z*: [M+Na]<sup>+</sup> Calcd. for C<sub>16</sub>H<sub>13</sub>NNaO<sub>4</sub> 306.0737; found 306.0743.

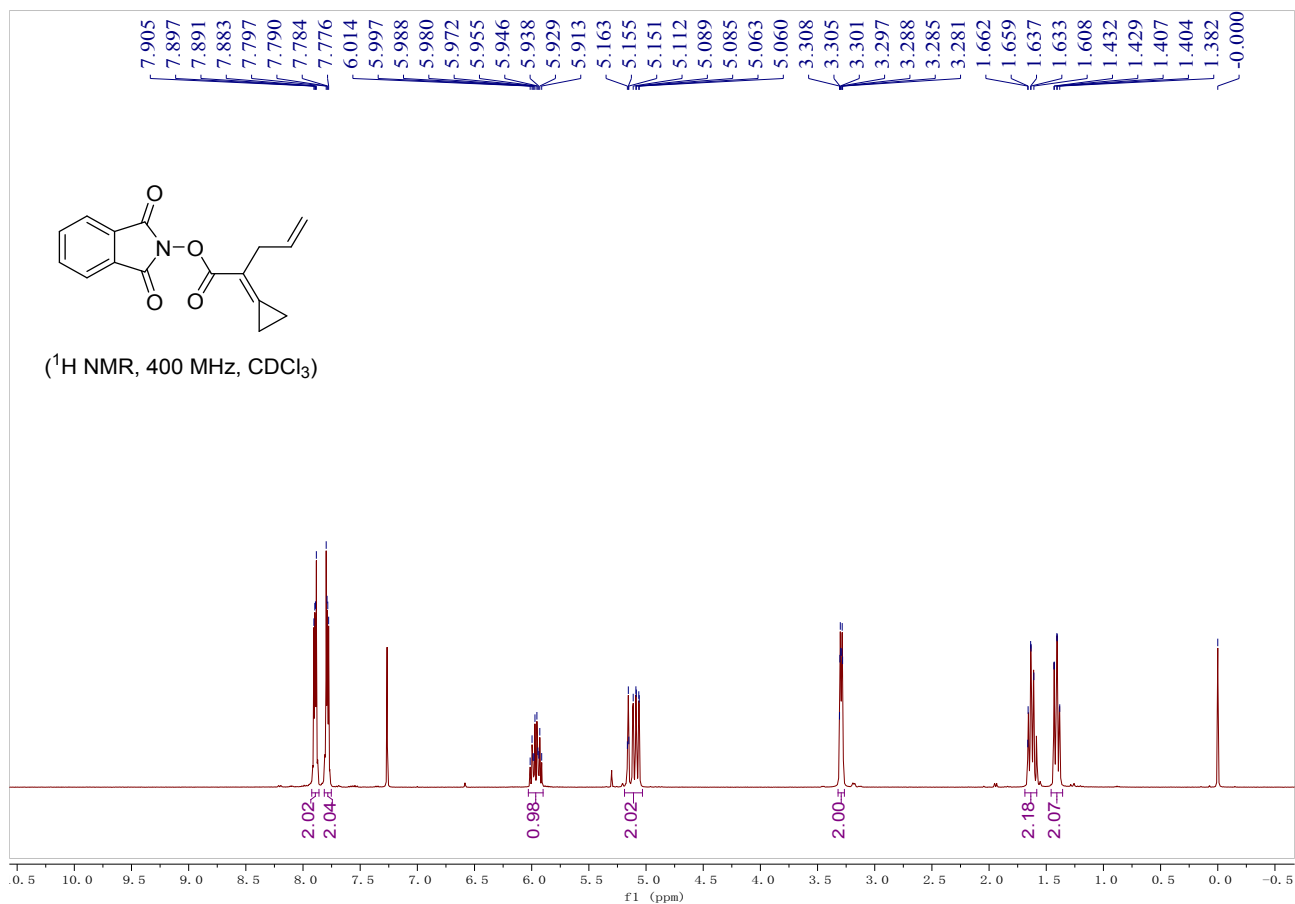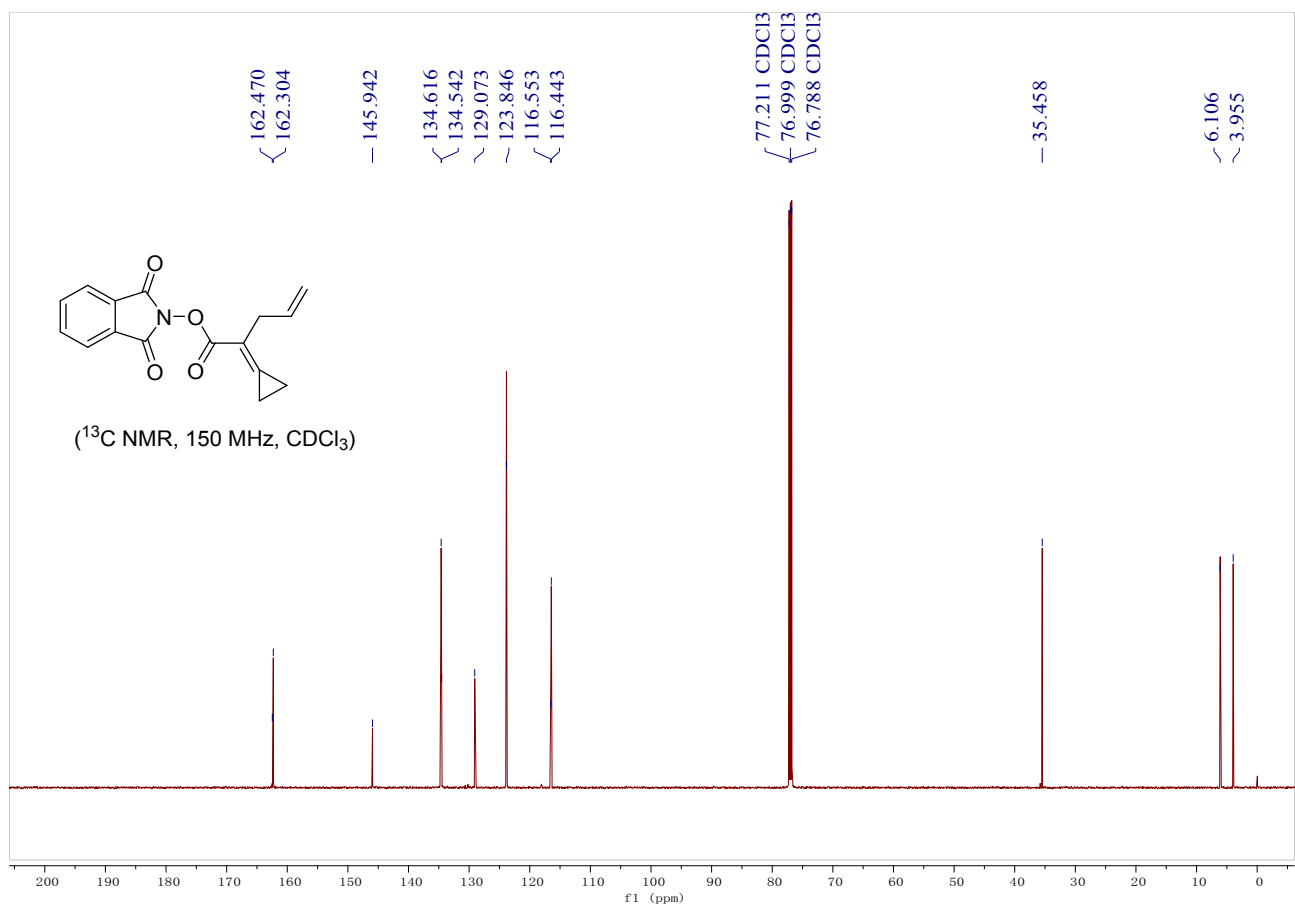

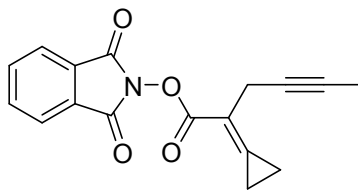

**1,3-Dioxoisindolin-2-yl 2-cyclopropylidenehex-4-ynoate (1j):** white solid, m.p. 176-178 °C, 356.3 mg, 60%, Eluent: PE/EA = 10/1.

**<sup>1</sup>H NMR** (400 MHz, CDCl<sub>3</sub>, TMS): δ 7.90 (dd, *J* = 5.6, 3.2 Hz, 2H), 7.79 (dd, *J* = 5.6, 3.2 Hz, 2H), 3.40 (qt, *J* = 2.8, 1.4 Hz, 2H), 1.80 (t, *J* = 2.8 Hz, 3H), 1.66-1.59 (m, 2H), 1.58-1.50 (m, 2H). **<sup>13</sup>C NMR** (100 MHz, CDCl<sub>3</sub>, TMS): δ 3.5, 4.5, 5.8, 21.3, 74.6, 77.9, 114.3, 123.9, 129.0, 134.7, 146.7, 162.0, 162.2. **IR** (EtOH): ν 2956, 2922, 2219, 1840, 1798, 1746, 1605, 1420, 1358, 1273, 1214, 1187, 1132, 996, 962 cm<sup>-1</sup>. **HRMS** (ESI) *m/z*: [M+Na]<sup>+</sup> Calcd. for C<sub>17</sub>H<sub>13</sub>NNaO<sub>4</sub> 318.0737; found 318.0741.

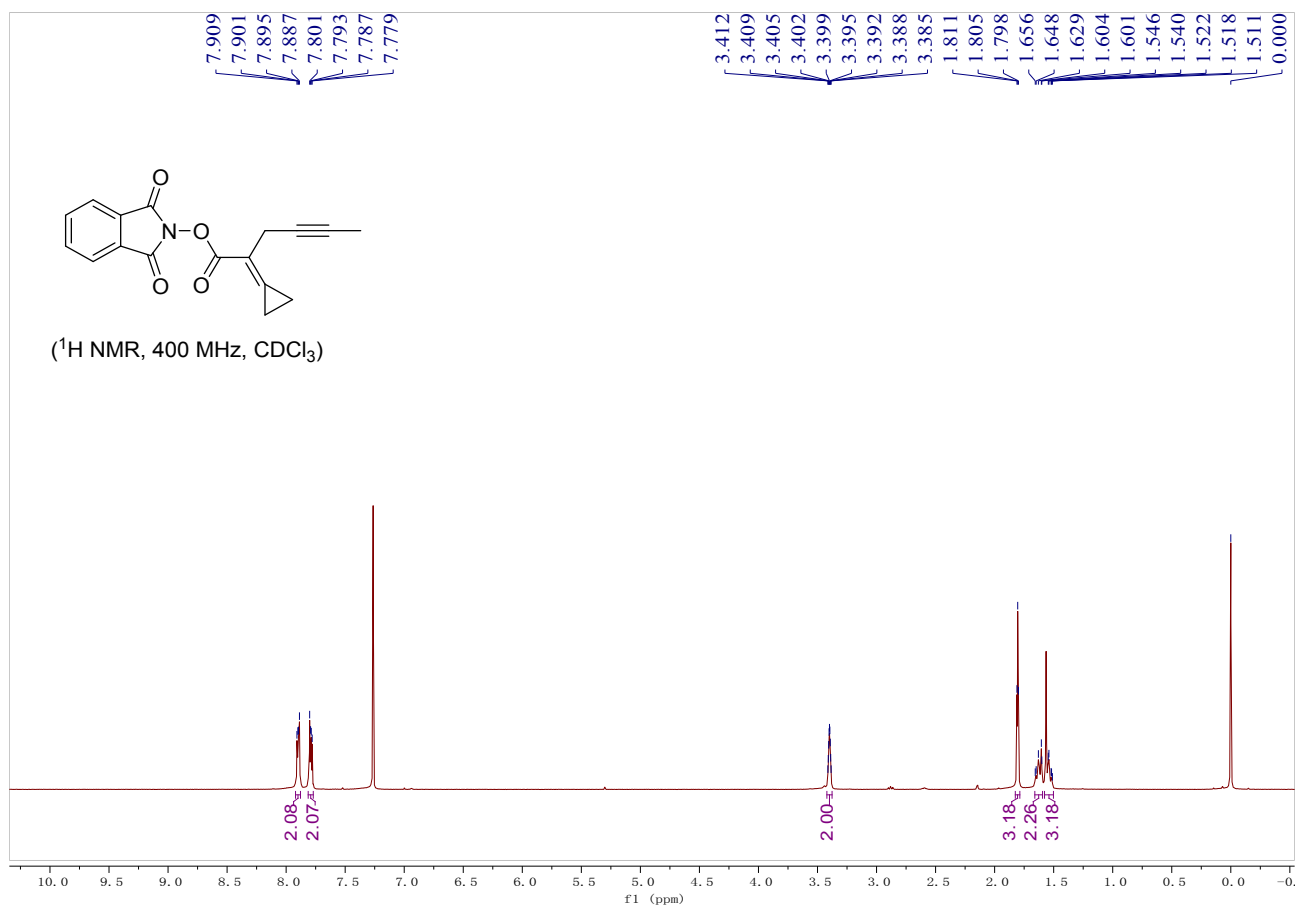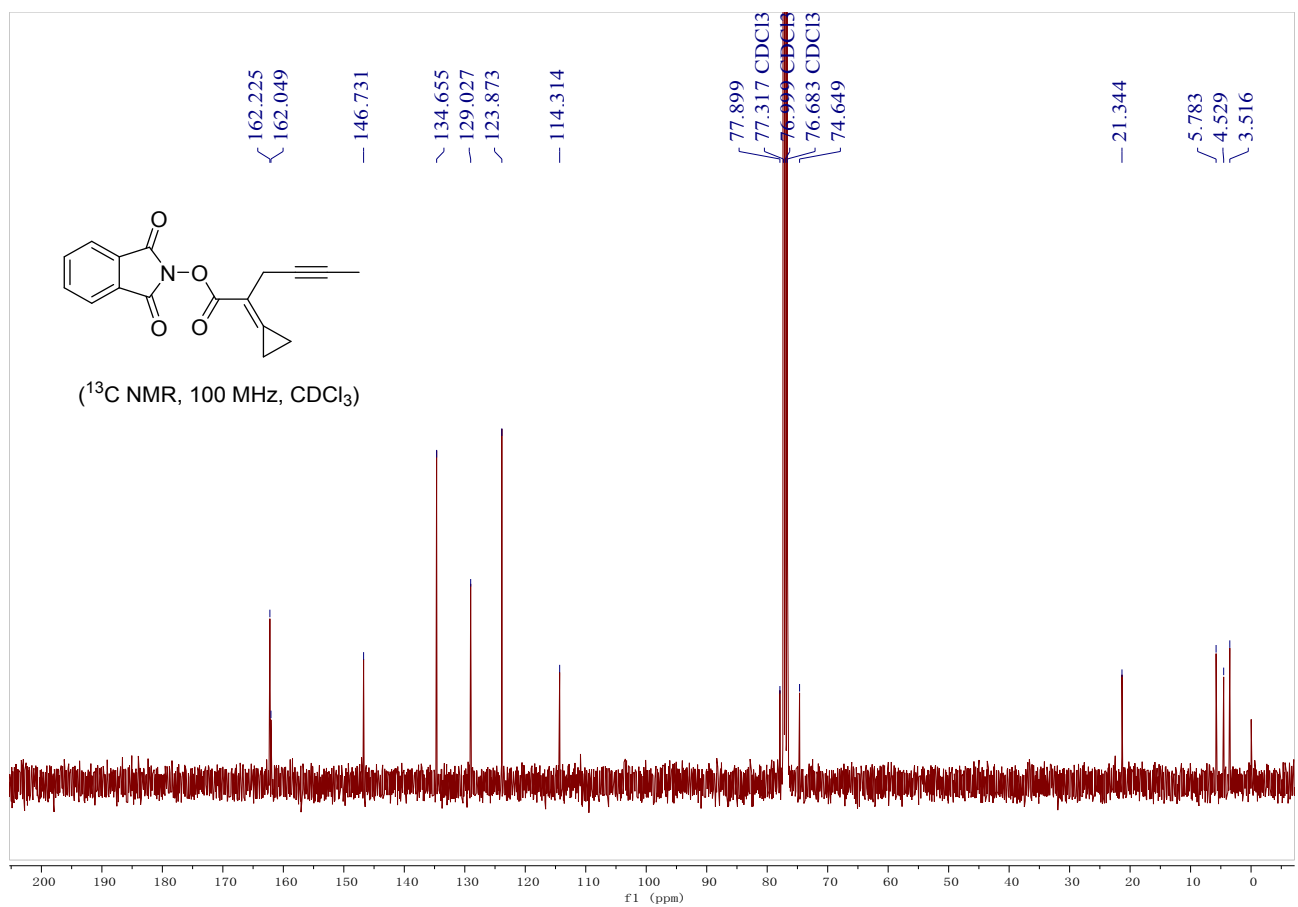

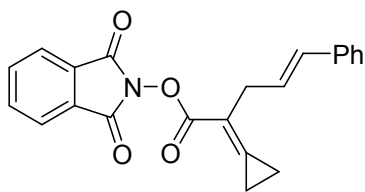

**1,3-Dioxoisindolin-2-yl (E)-2-cyclopropylidene-5-phenylpent-4-enoate (1k):** white solid, m.p. 189-190 °C, 549.8 mg, 76%, Eluent: PE/EA = 10/1.

**<sup>1</sup>H NMR** (400 MHz, CDCl<sub>3</sub>, TMS): δ 7.90 (dd, *J* = 5.6, 3.2 Hz, 2H), 7.79 (dd, *J* = 5.6, 3.2 Hz, 2H), 7.40-7.34 (m, 2H), 7.30 (t, *J* = 7.6 Hz, 2H), 7.25-7.16 (m, 1H), 6.49 (d, *J* = 15.8 Hz, 1H), 6.35 (dt, *J* = 15.8, 6.8 Hz, 1H), 3.49-3.41 (m, 2H), 1.68-1.61 (m, 2H), 1.47-1.39 (m, 2H). **<sup>13</sup>C NMR** (100 MHz, CDCl<sub>3</sub>, TMS): δ 4.1, 6.1, 34.8, 116.8, 123.9, 126.1, 126.3, 127.2, 128.5, 129.0, 131.6, 134.6, 137.3, 146.1, 162.3, 162.5. **IR** (EtOH): ν 3069, 3024, 2920, 1796, 1744, 1602, 1496, 1467, 1371, 1222, 1185, 1159, 1138, 1090, 986, 847, 773 cm<sup>-1</sup>. **HRMS** (ESI) *m/z*: [M+Na]<sup>+</sup> Calcd. for C<sub>22</sub>H<sub>17</sub>NNaO<sub>4</sub> 382.1050; found 382.1051.

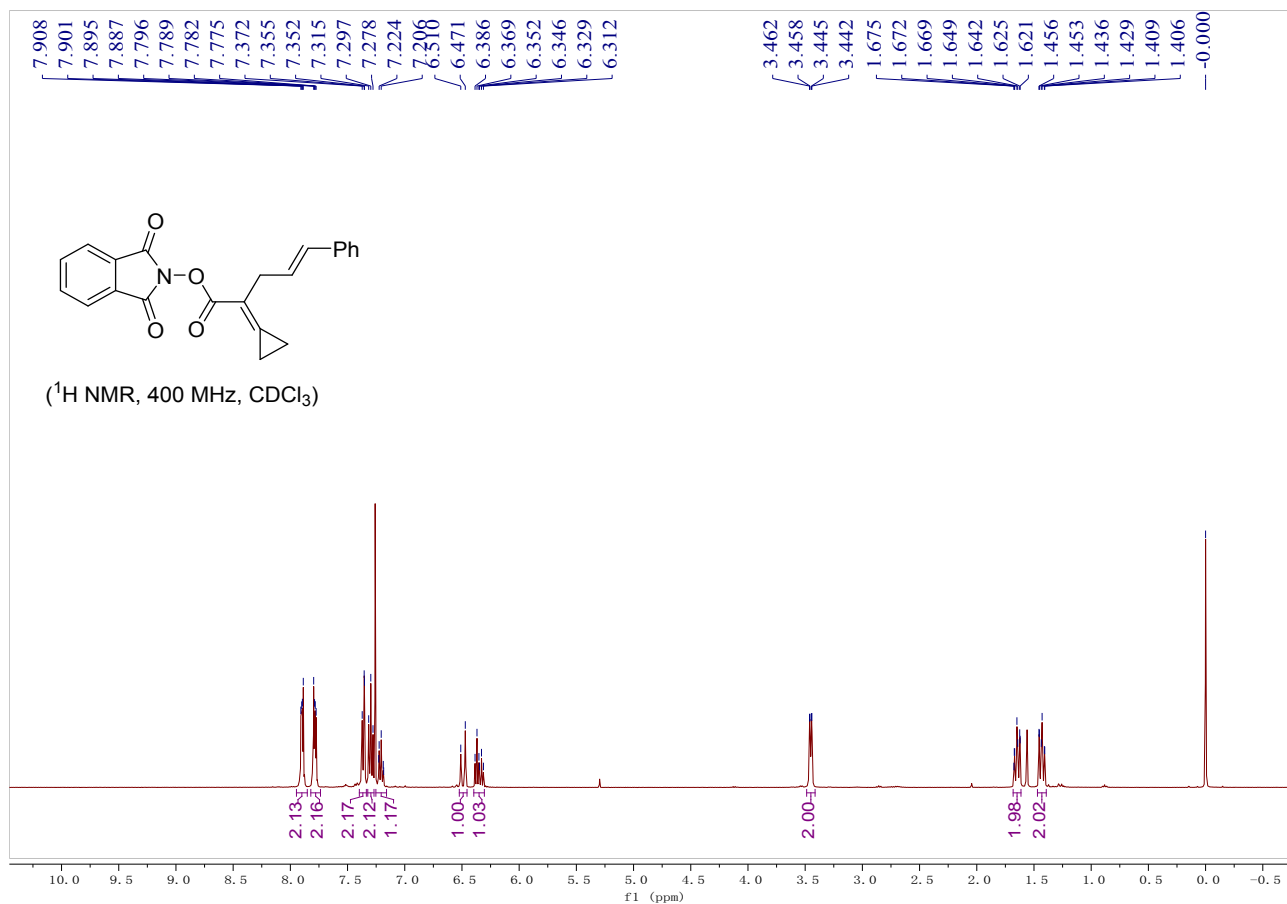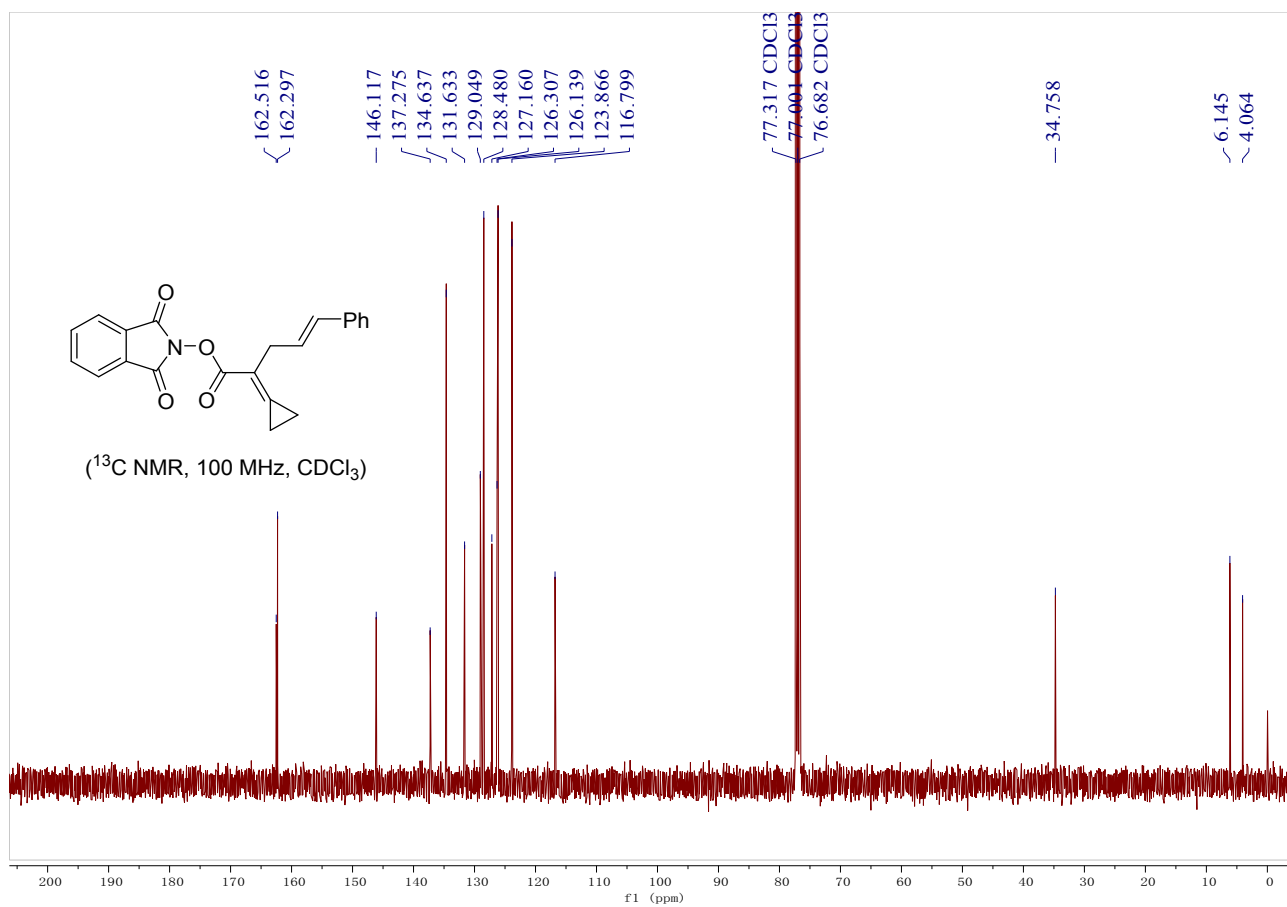

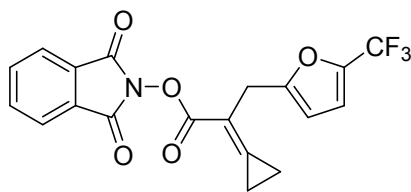

**1,3-Dioxoisindolin-2-yl 2-cyclopropylidene-3-(5-(trifluoromethyl)furan-2-yl)propanoate (11):**

white solid, m.p. 185-186 °C, 493.3 mg, 63%, Eluent: PE/EA = 10/1.

**<sup>1</sup>H NMR** (400 MHz, CDCl<sub>3</sub>, TMS): δ 7.82 (dd, *J* = 5.6, 3.2 Hz, 2H), 7.72 (dd, *J* = 5.6, 3.2 Hz, 2H), 6.64 (dd, *J* = 3.2, 1.4 Hz, 1H), 6.13 (d, *J* = 3.2 Hz, 1H), 3.83 (s, 2H), 1.64-1.53 (m, 2H), 1.24-1.14 (m, 2H). **<sup>13</sup>C NMR** (100 MHz, CDCl<sub>3</sub>, TMS): δ 3.8, 6.3, 29.6, 108.0, 112.5, 114.3, 119.1 (q, *J* = 264.7 Hz), 123.9, 128.9, 134.7, 140.7 (q, *J* = 42.5 Hz), 148.1, 155.0 (q, *J* = 1.5 Hz), 162.08, 162.13. **<sup>19</sup>F NMR** (376 MHz, CDCl<sub>3</sub>): δ -63.9; **IR** (EtOH): ν 3023, 2922, 1796, 1768, 1744, 1467, 1371, 1322, 1185, 1138, 1090, 1016, 852, 767, 699 cm<sup>-1</sup>. **HRMS** (ESI) *m/z*: [M+Na]<sup>+</sup> Calcd. for C<sub>19</sub>H<sub>12</sub>F<sub>3</sub>NNaO<sub>5</sub> 414.0560; found 414.0562.



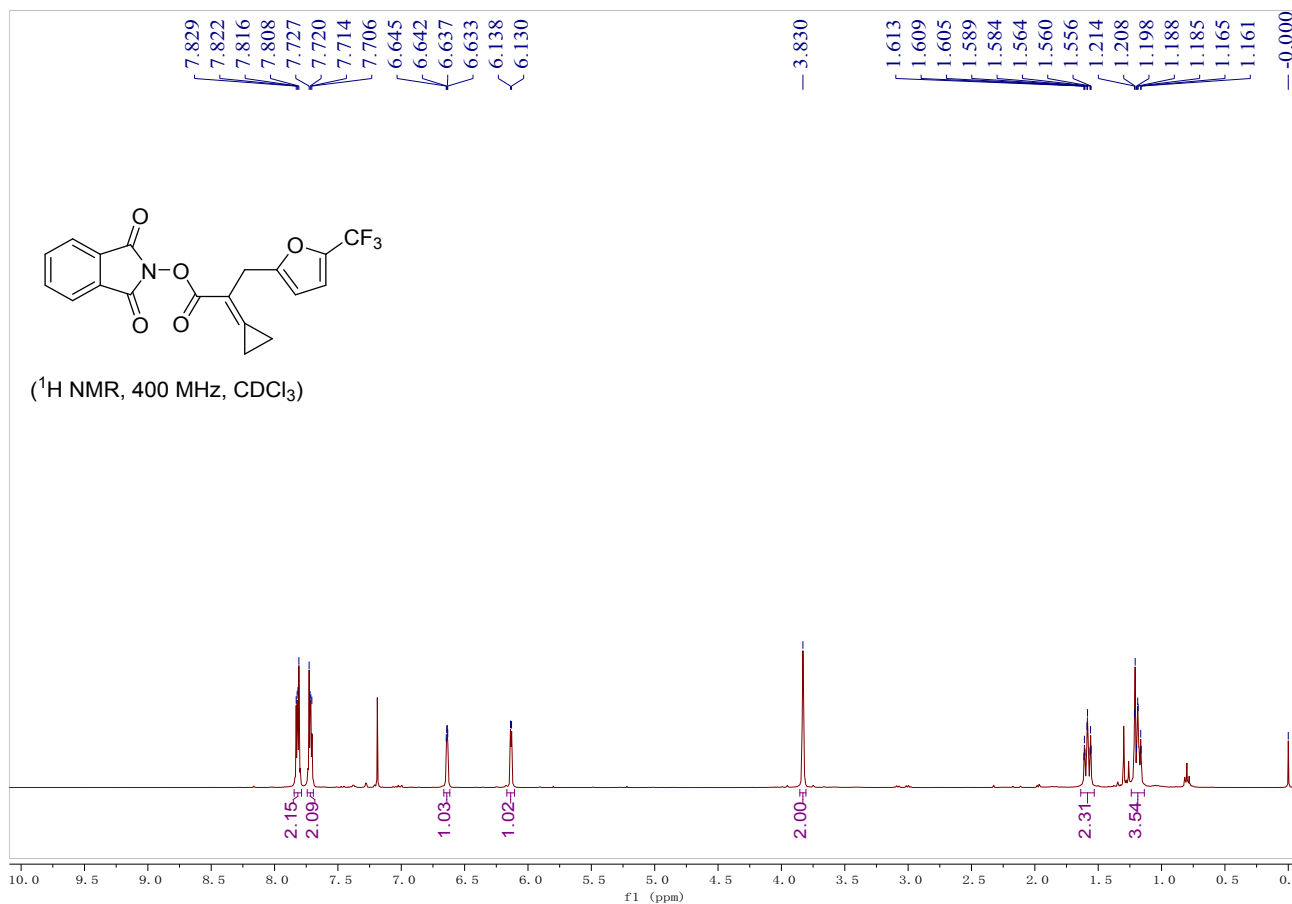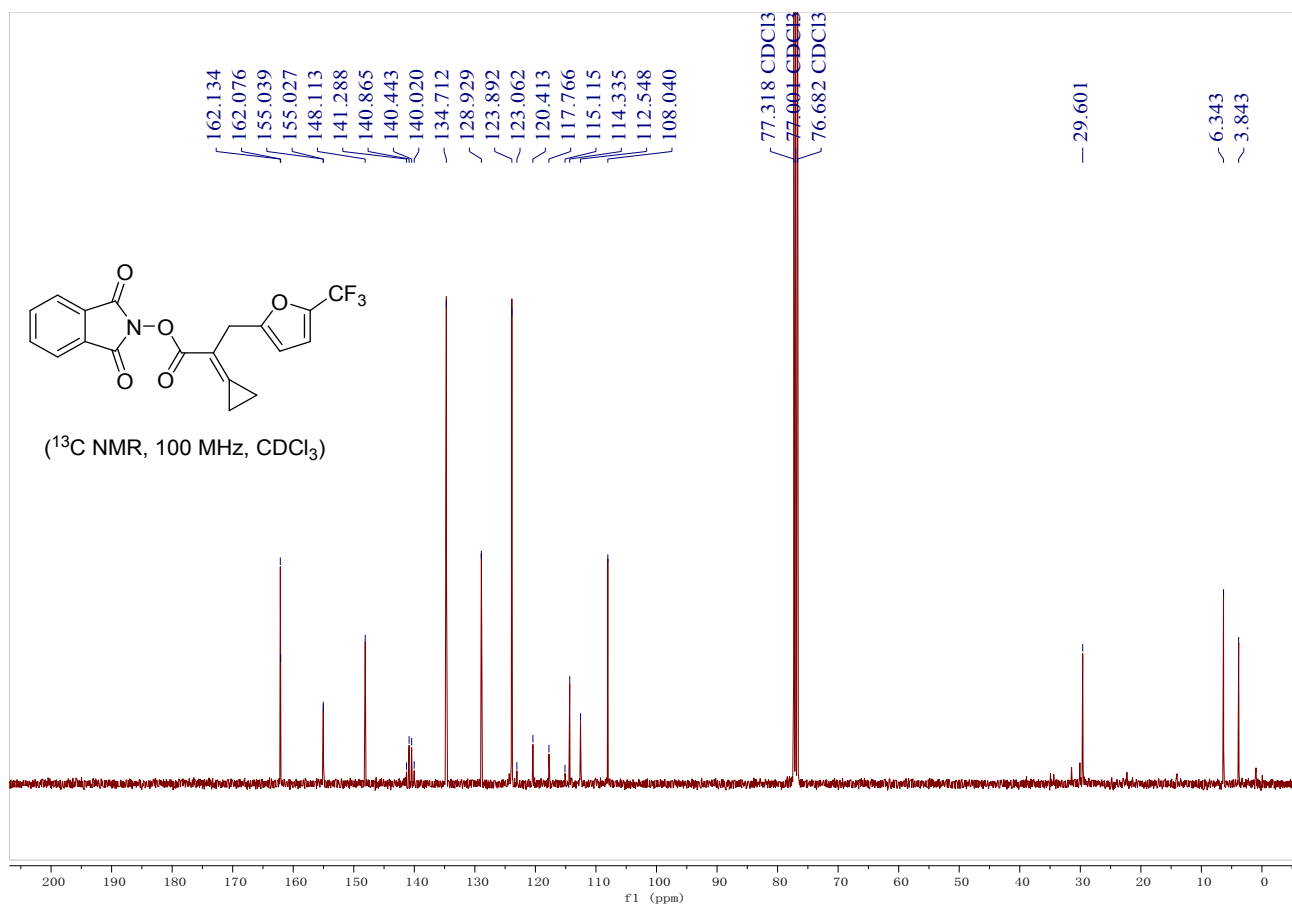

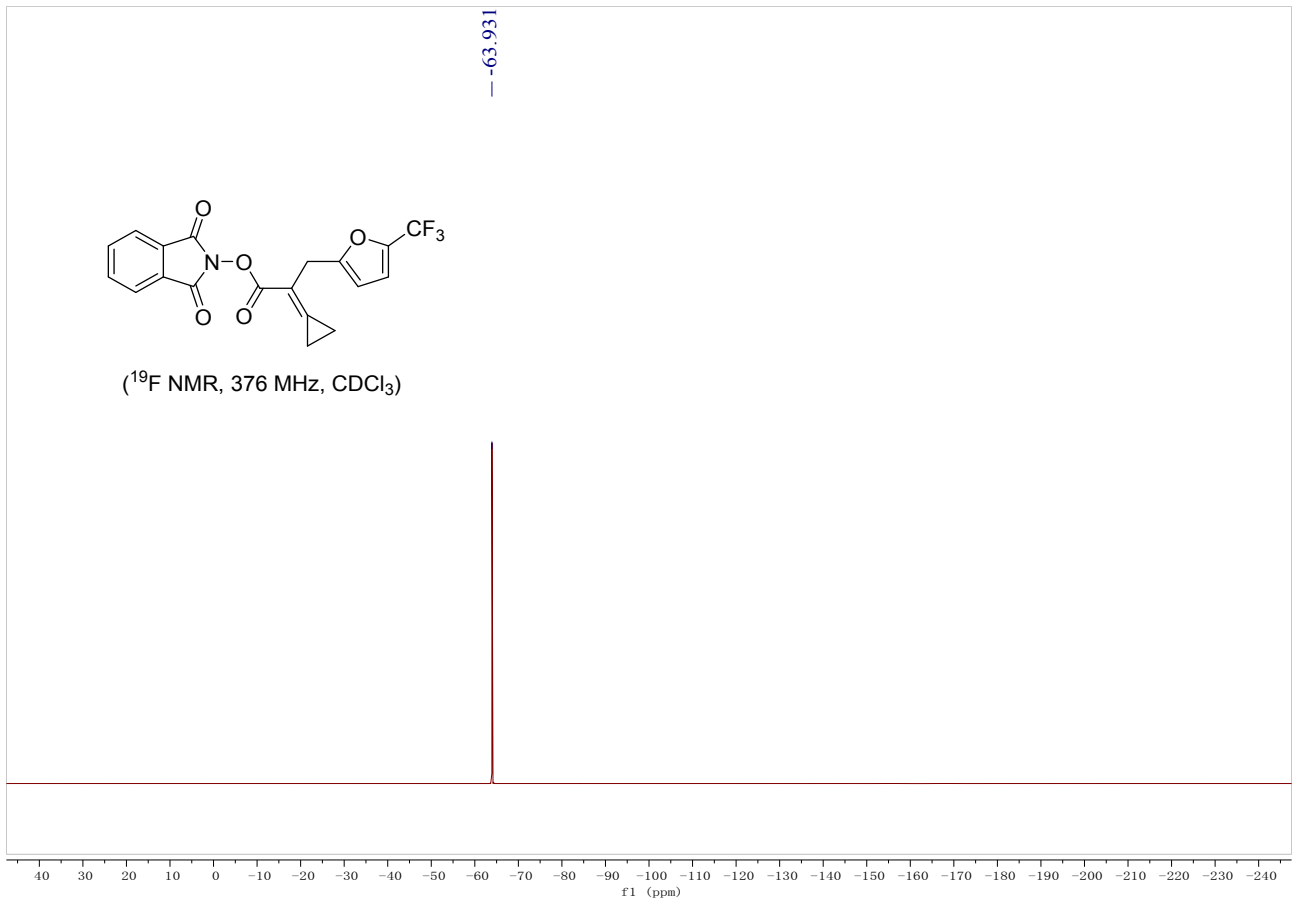

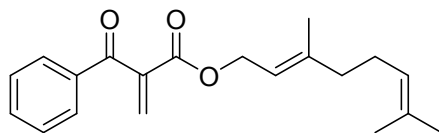

**(E)-3,7-dimethylocta-2,6-dien-1-yl 2-benzoylacrylate (2ab)**: colorless oil, 512 mg, 82%, Eluent: PE/EA = 10/1.

**<sup>1</sup>H NMR** (600 MHz, CDCl<sub>3</sub>, TMS): δ 7.88-7.83 (m, 2H), 7.61-7.56 (m, 1H), 7.49-7.43 (m, 2H), 6.68 (s, 1H), 6.07 (s, 1H), 5.27-5.21 (m, 1H), 5.07-5.02 (m, 1H), 4.68 (d, *J* = 7.2 Hz, 2H), 2.08-2.01 (m, 2H), 2.02-1.96 (m, 2H), 1.67 (s, 3H), 1.62 (s, 3H), 1.59 (s, 3H). **<sup>13</sup>C NMR** (150 MHz, CDCl<sub>3</sub>, TMS): δ 16.4, 17.6, 25.6, 26.2, 39.4, 62.3, 117.5, 123.6, 128.5, 129.4, 131.4, 131.8, 133.5, 136.3, 141.5, 143.0, 164.3, 193.1. **IR** (EtOH): ν 2970, 2921, 2896, 2872, 1730, 1679, 1633, 1446, 1379, 1351, 1244, 1180, 1139, 1109, 944, 851, 757, 689 cm<sup>-1</sup>. **HRMS** (ESI) *m/z*: [M+H]<sup>+</sup> Calcd. for C<sub>20</sub>H<sub>25</sub>O<sub>3</sub> 313.1798; found 313.1799.

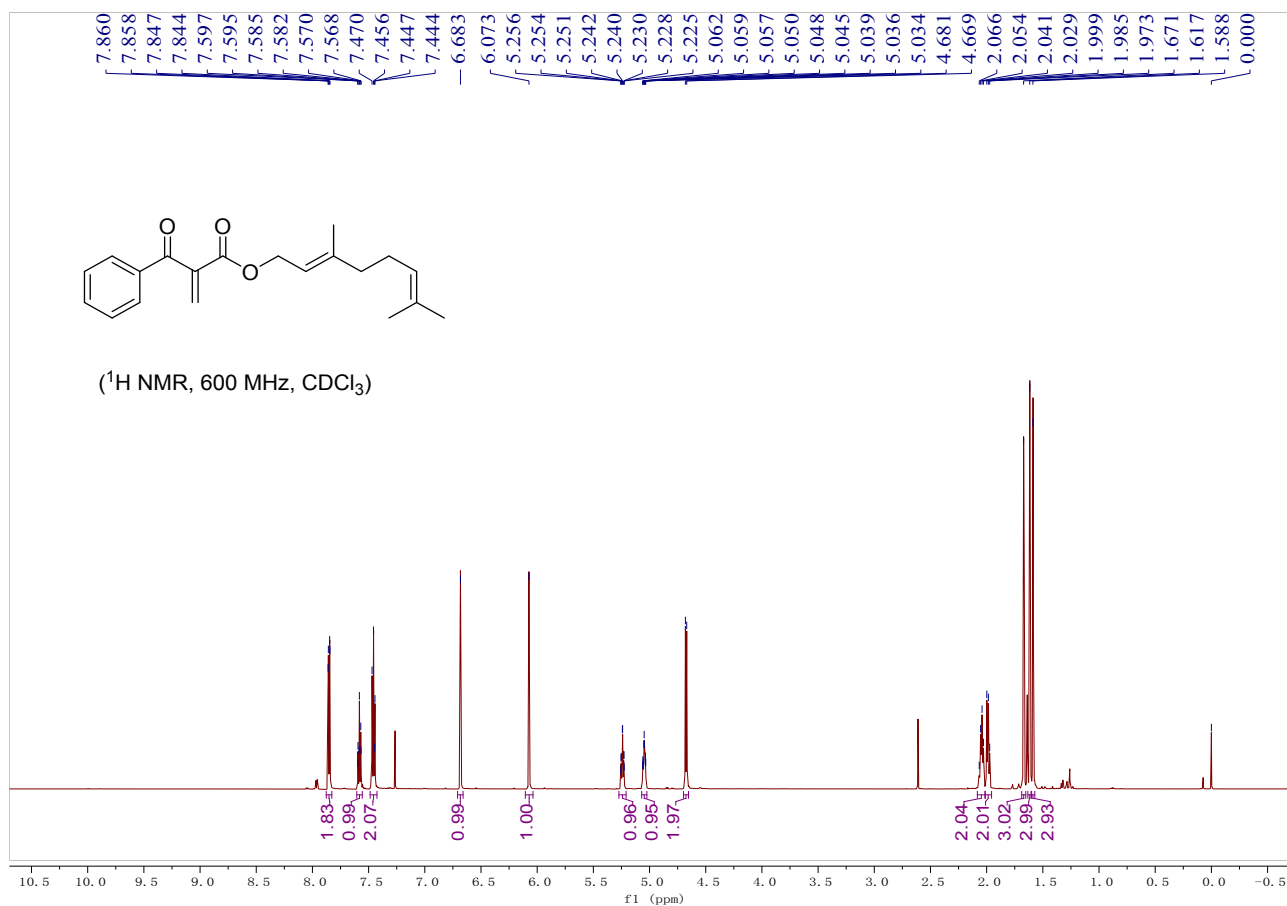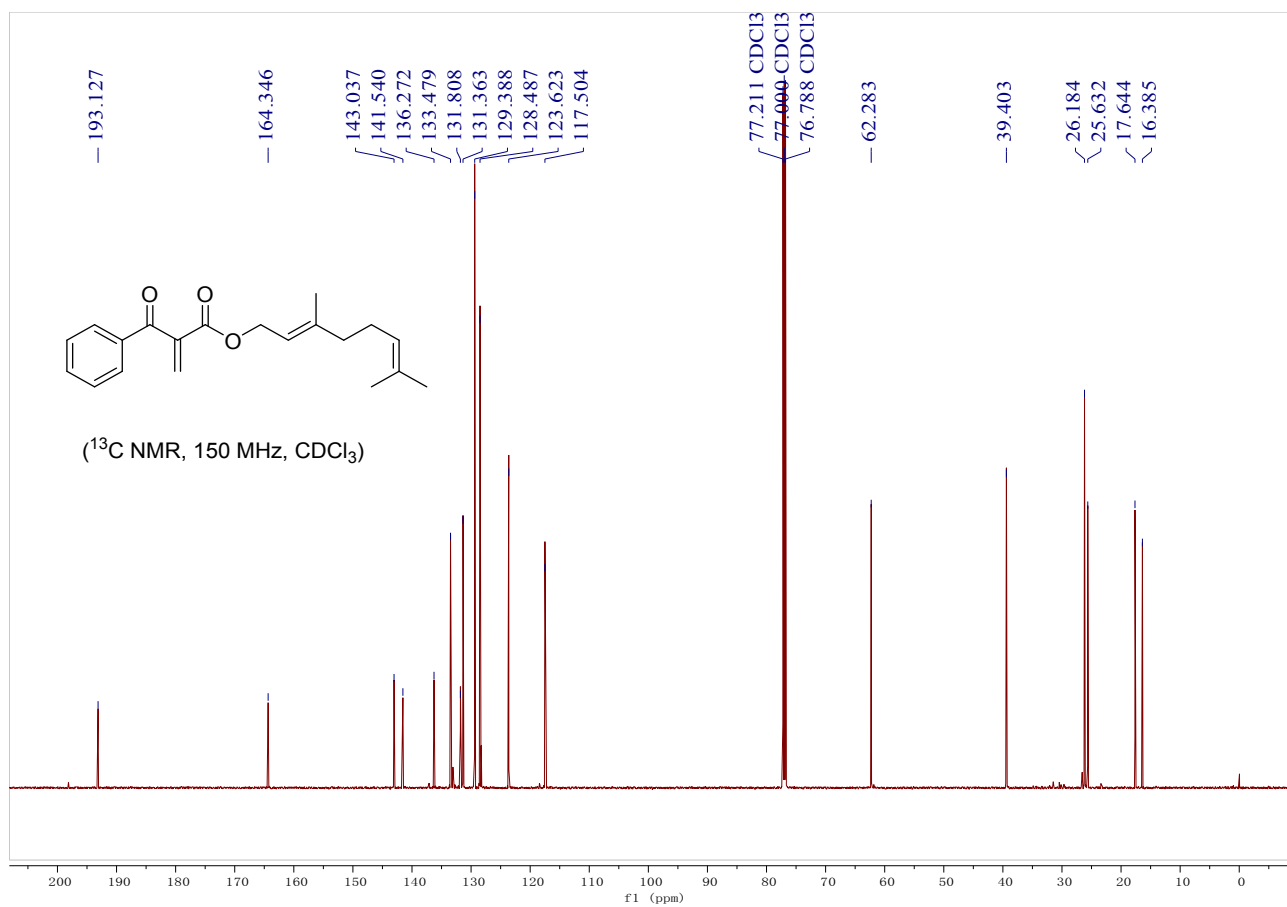

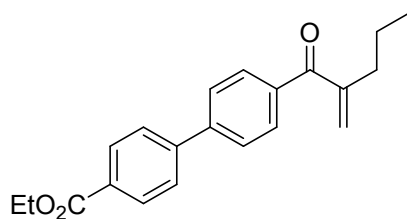

**Ethyl 4'-(2-methylenepentanoyl)-[1,1'-biphenyl]-4-carboxylate (2ac):** colorless oil, 206 mg, 32%, Eluent: PE/EA = 10/1.

**<sup>1</sup>H NMR** (600 MHz, CDCl<sub>3</sub>, TMS): δ 8.14 (d, *J* = 8.4 Hz, 2H), 7.87 (d, *J* = 8.4 Hz, 2H), 7.69 (d, *J* = 8.4 Hz, 4H), 5.87-5.84 (m, 1H), 5.63 (s, 1H), 4.41 (q, *J* = 7.2 Hz, 2H), 2.50-2.46 (m, 2H), 1.59-1.52 (m, 2H), 1.42 (t, *J* = 7.2 Hz, 3H), 0.99 (t, *J* = 7.4 Hz, 3H). **<sup>13</sup>C NMR** (150 MHz, CDCl<sub>3</sub>, TMS): δ 13.8, 14.3, 21.4, 34.4, 61.1, 125.2, 127.06, 127.15, 130.16, 130.20, 137.3, 143.7, 144.3, 148.3, 166.3, 197.9. **IR** (EtOH): ν 2988, 2959, 1707, 1642, 1601, 1332, 1274, 1171, 1102, 984, 849, 767, 699 cm<sup>-1</sup>. **HRMS** (ESI) *m/z*: [M]<sup>+</sup> Calcd. for C<sub>21</sub>H<sub>22</sub>O<sub>3</sub> 322.1563; found 322.1559.

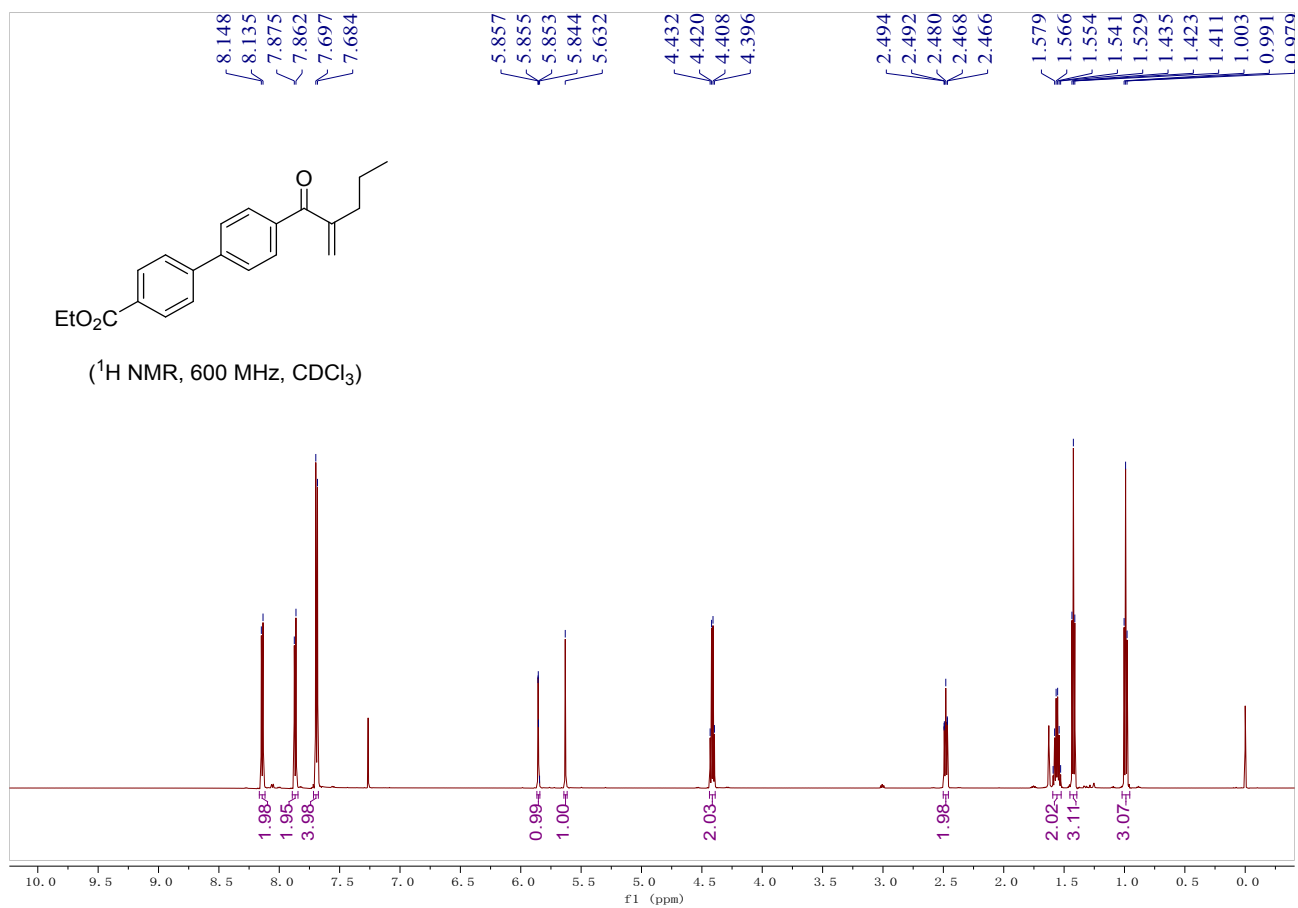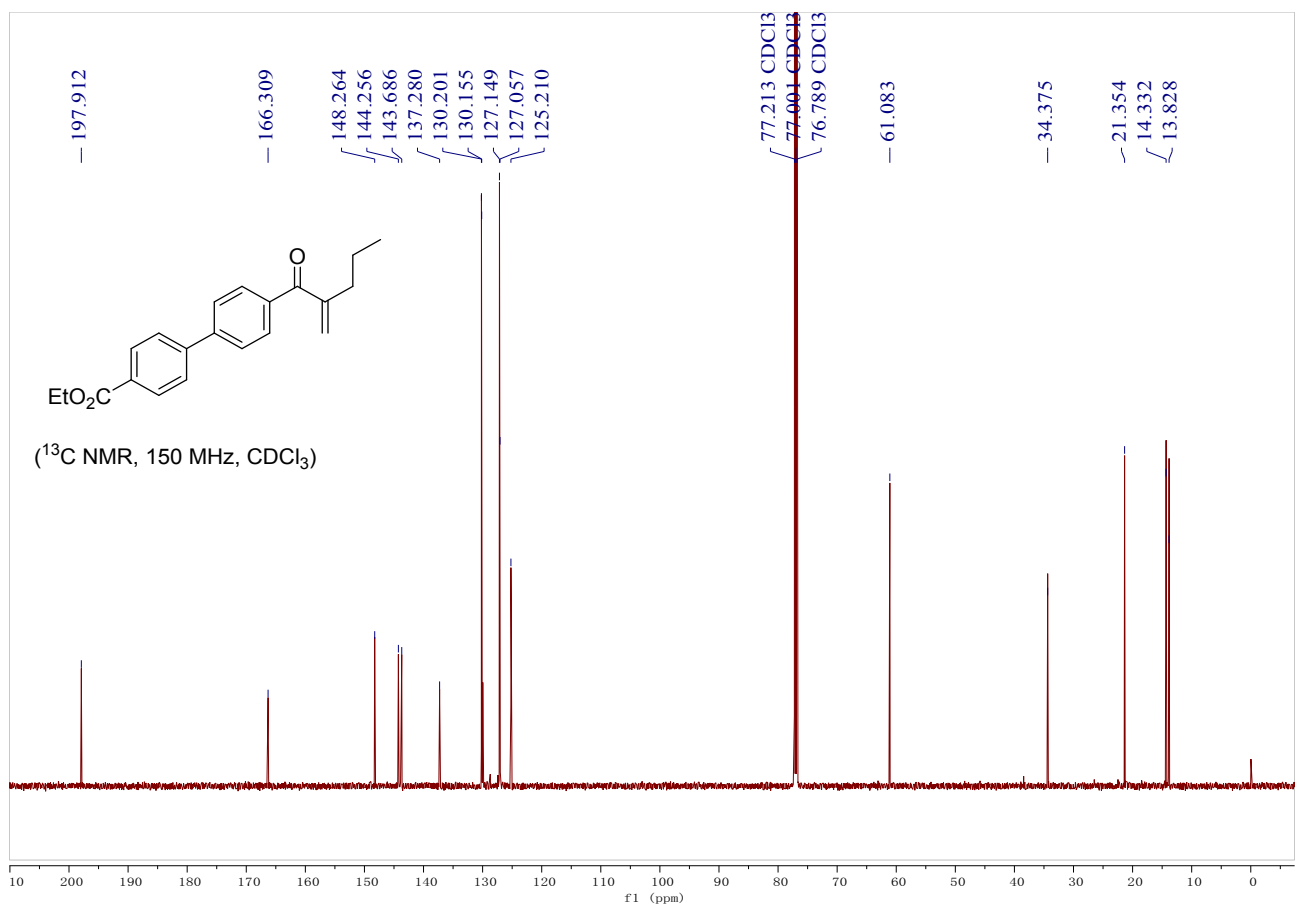

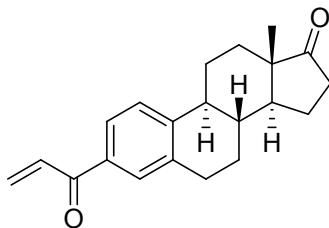

**(8*R*,9*S*,13*S*,14*S*)-3-acryloyl-13-methyl-6,7,8,9,11,12,13,14,15,16-decahydro-17*H*-**

**cyclopenta[*a*]phenanthren-17-one (2ad):** colorless solid, m.p. 205-206 °C, 259 mg, 42%, Eluent: PE/EA = 30/1.

**<sup>1</sup>H NMR** (400 MHz, CDCl<sub>3</sub>, TMS): δ 7.76-7.69 (m, 2H), 7.42-7.40 (m, 1H), 7.17 (dd, *J* = 17.2, 10.4 Hz, 1H), 6.44 (dd, *J* = 17.2, 1.8 Hz, 1H), 5.91 (dd, *J* = 10.4, 1.8 Hz, 1H), 3.02-2.96 (m, 2H), 2.58-2.45 (m, 2H), 2.36 (td, *J* = 10.8, 4.2 Hz, 1H), 2.21-2.14 (m, 1H), 2.11-2.05 (m, 2H), 2.02-1.97 (m, 1H), 1.73-1.46 (m, 6H), 0.93 (s, 3H). **<sup>13</sup>C NMR** (150 MHz, CDCl<sub>3</sub>, TMS): δ 13.8, 21.6, 25.6, 26.3, 31.5, 35.8, 37.8, 44.7, 47.9, 50.5, 125.6, 126.2, 129.4, 129.7, 132.4, 134.9, 137.1, 145.4, 190.7, 220.5. **IR** (EtOH): ν 3002, 2959, 2899, 2863, 1707, 1643, 1553, 1274, 1202, 1171, 1103, 1004, 984, 944, 850, 736 cm<sup>-1</sup>. **HRMS** (EI) *m/z*: [M]<sup>+</sup> Calcd. for C<sub>21</sub>H<sub>24</sub>O<sub>2</sub> 308.1771; found 308.1766.

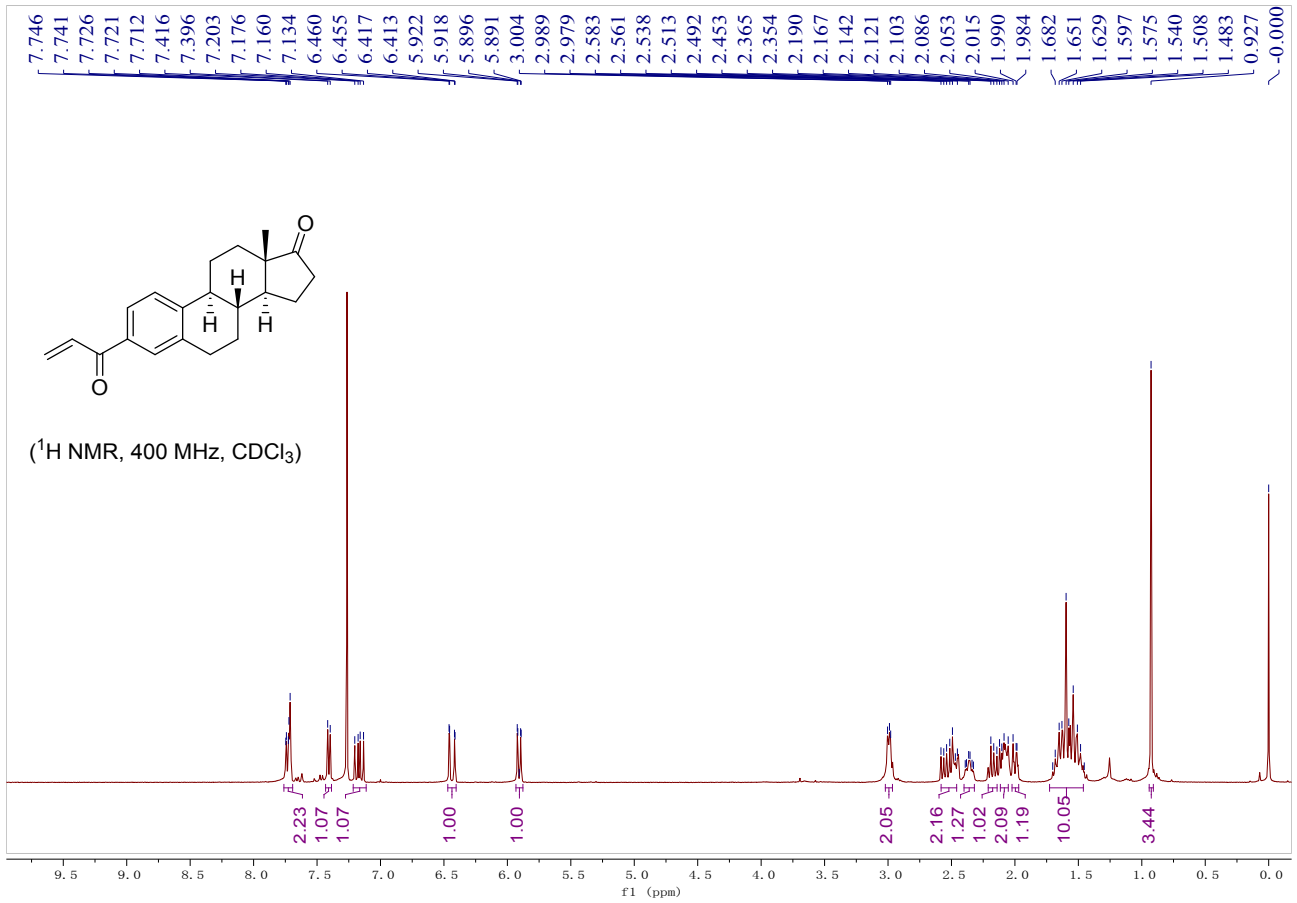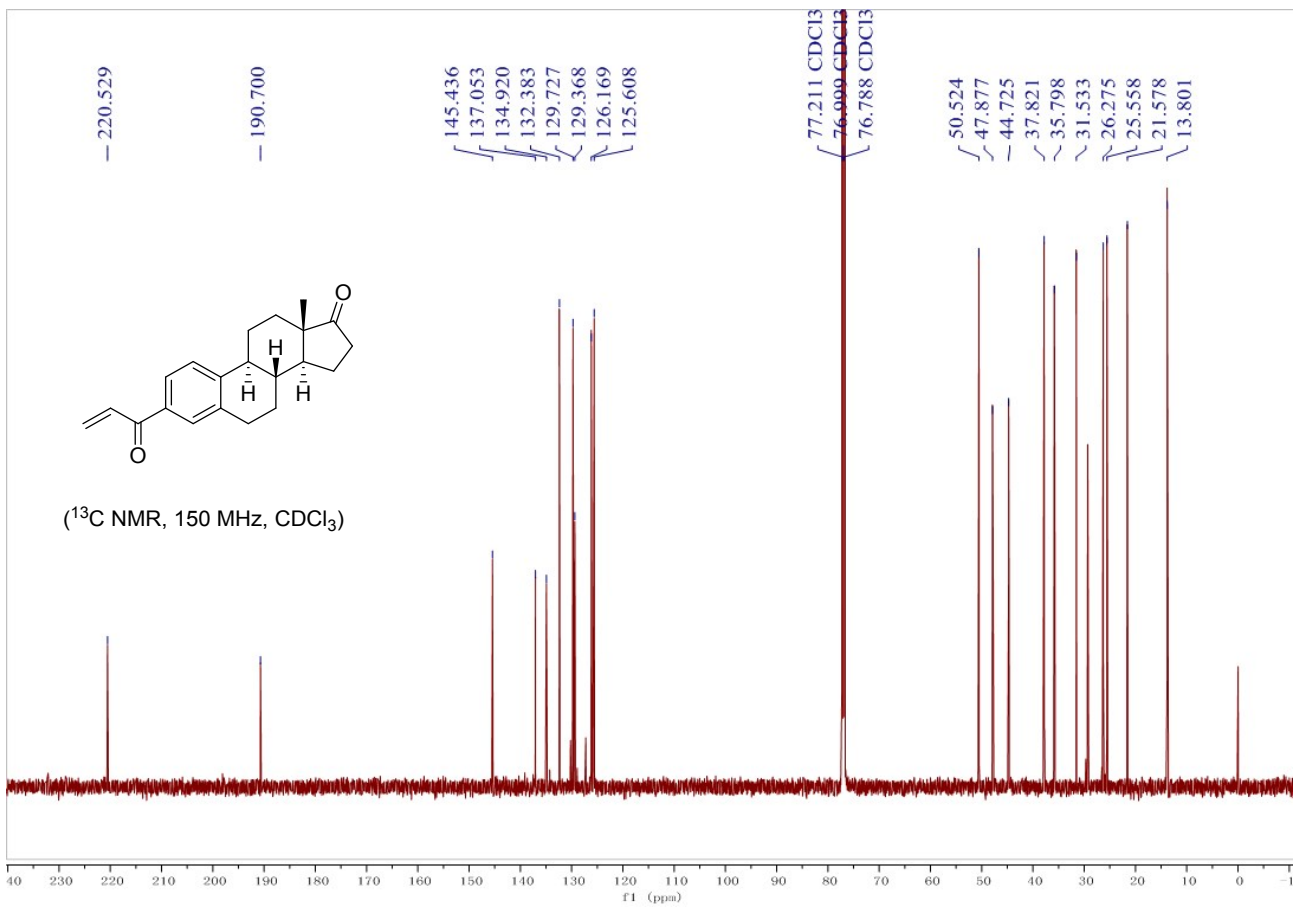



## 7. The Characterization Data of Products

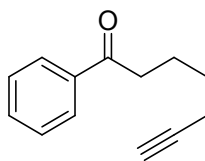

**1-phenylhept-6-yn-1-one (3aa):** colorless oil, 28 mg, 75%, Eluent: PE/EA = 20/1.

**<sup>1</sup>H NMR** (400 MHz, CDCl<sub>3</sub>, TMS): δ 8.01-7.93 (m, 2H), 7.61-7.52 (m, 1H), 7.51-7.42 (m, 2H), 3.01 (t, *J* = 7.2 Hz, 2H), 2.26 (td, *J* = 7.2, 2.6 Hz, 2H), 1.96 (t, *J* = 2.6 Hz, 1H), 1.91-1.84 (m, 2H), 1.68-1.58 (m, 2H). **<sup>13</sup>C NMR** (100 MHz, CDCl<sub>3</sub>, TMS): δ 18.3, 23.3, 28.0, 37.9, 68.6, 84.1, 128.0, 128.6, 133.0, 136.9, 200.0. **IR** (EtOH): ν 3296, 2939, 2872, 2210, 1682, 1597, 1448, 1355, 1223, 1180, 1075, 974, 751, 689 cm<sup>-1</sup>. **HRMS** (ESI) *m/z*: [M]<sup>+</sup> Calcd. for C<sub>13</sub>H<sub>14</sub>O 186.1039; found 186.1037.

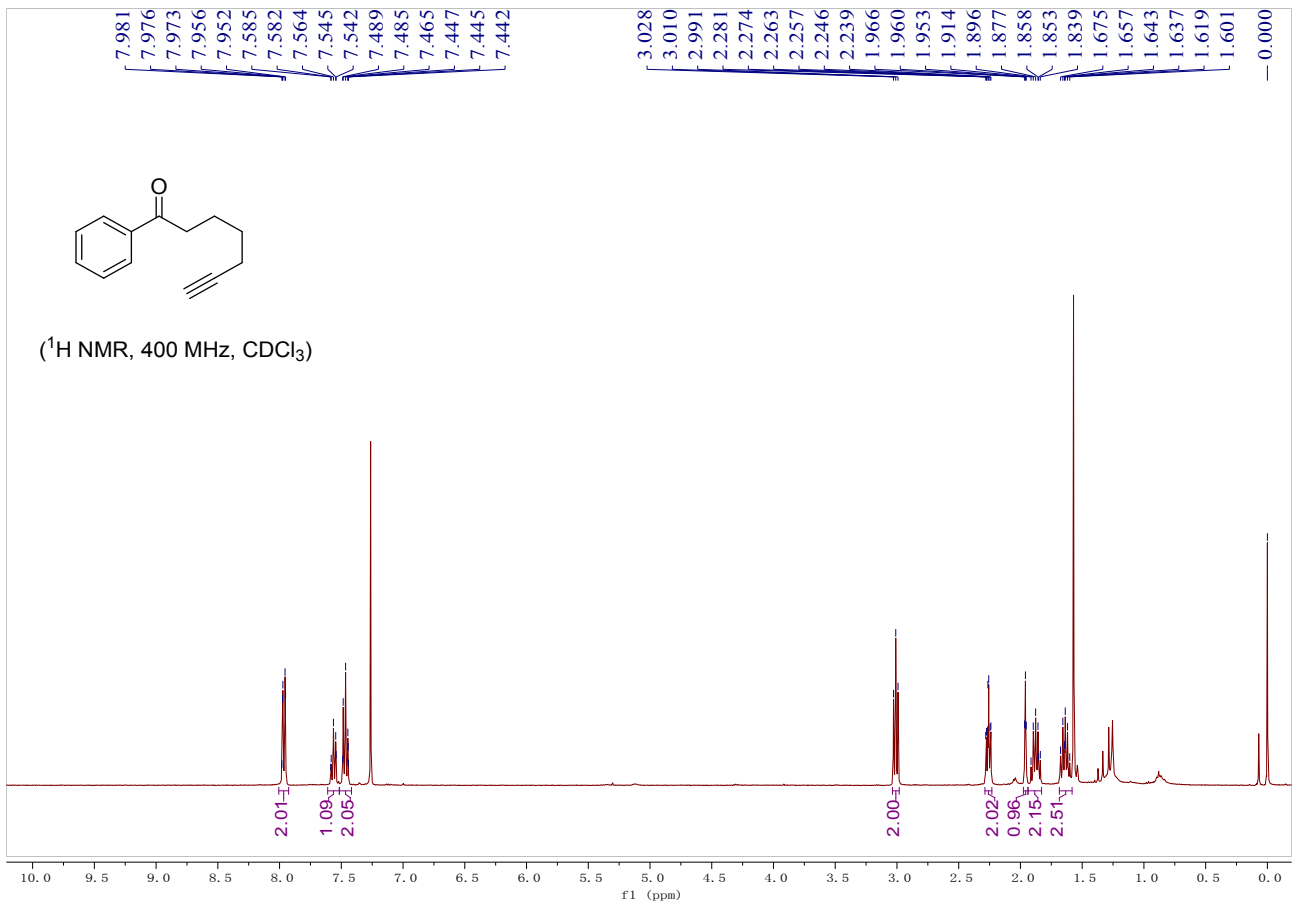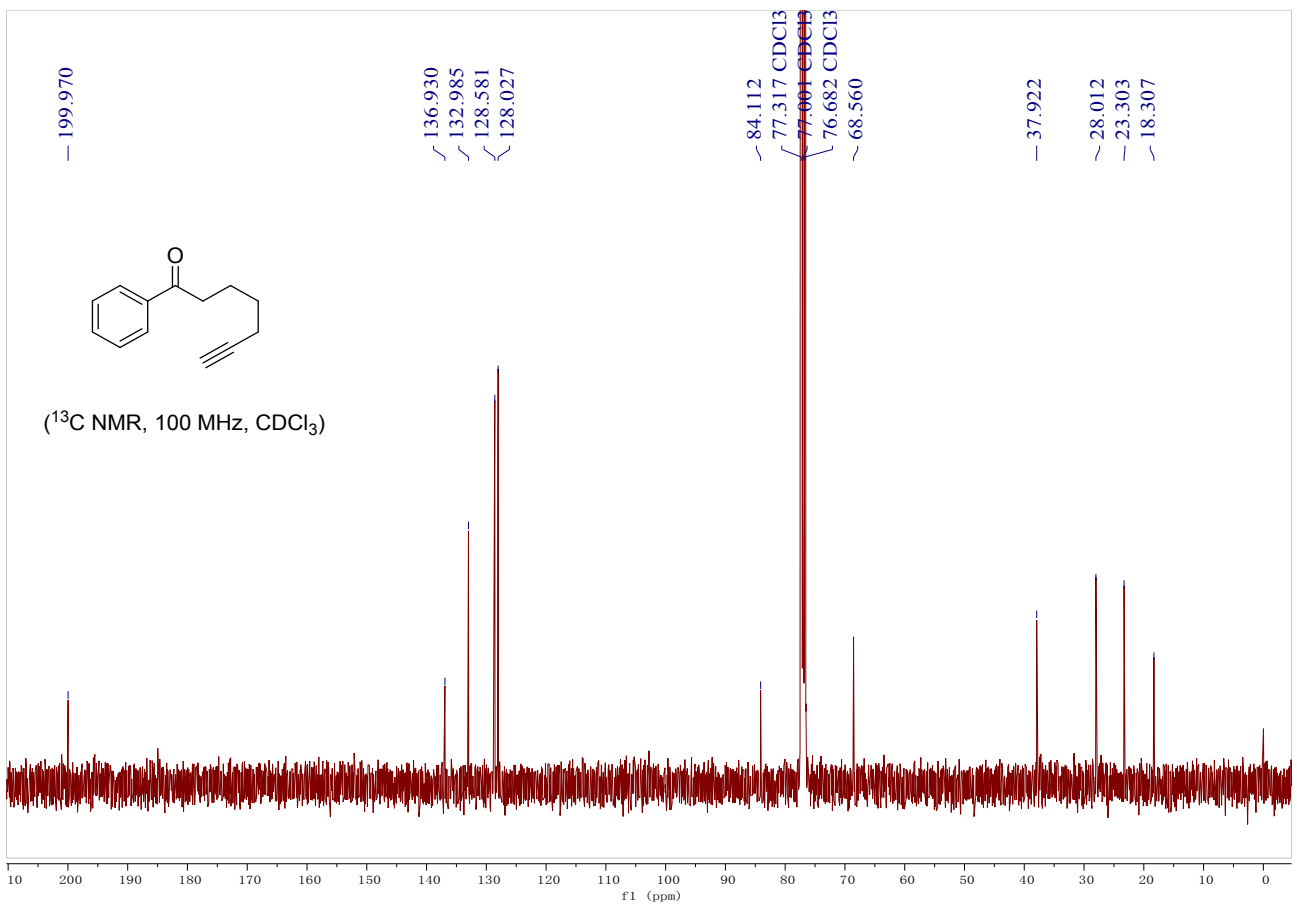

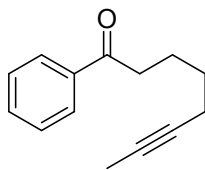

**1-phenyloct-6-yn-1-one (3ba)**: colorless oil, 34 mg, 85%, Eluent: PE/EA = 20/1.

**<sup>1</sup>H NMR** (400 MHz, CDCl<sub>3</sub>, TMS): δ 7.99-7.94 (m, 2H), 7.59-7.53 (m, 1H), 7.51-7.42 (m, 2H), 3.00 (t, *J* = 7.4 Hz, 2H), 2.19 (tq, *J* = 7.2, 2.6 Hz, 2H), 1.90-1.80 (m, 2H), 1.77 (t, *J* = 2.6 Hz, 3H), 1.62-1.56 (m, 2H). **<sup>13</sup>C NMR** (100 MHz, CDCl<sub>3</sub>, TMS): δ 3.5, 18.6, 23.5, 28.6, 38.0, 75.9, 78.7, 128.0, 128.5, 132.9, 137.0, 200.2. **IR** (EtOH): ν 2939, 2866, 2129, 1682, 1597, 1448, 1278, 1223, 1179, 1002, 752, 737, 690 cm<sup>-1</sup>. **HRMS** (ESI) *m/z*: [M+H]<sup>+</sup> Calcd. for C<sub>14</sub>H<sub>17</sub>O 201.1274; found 201.1275.

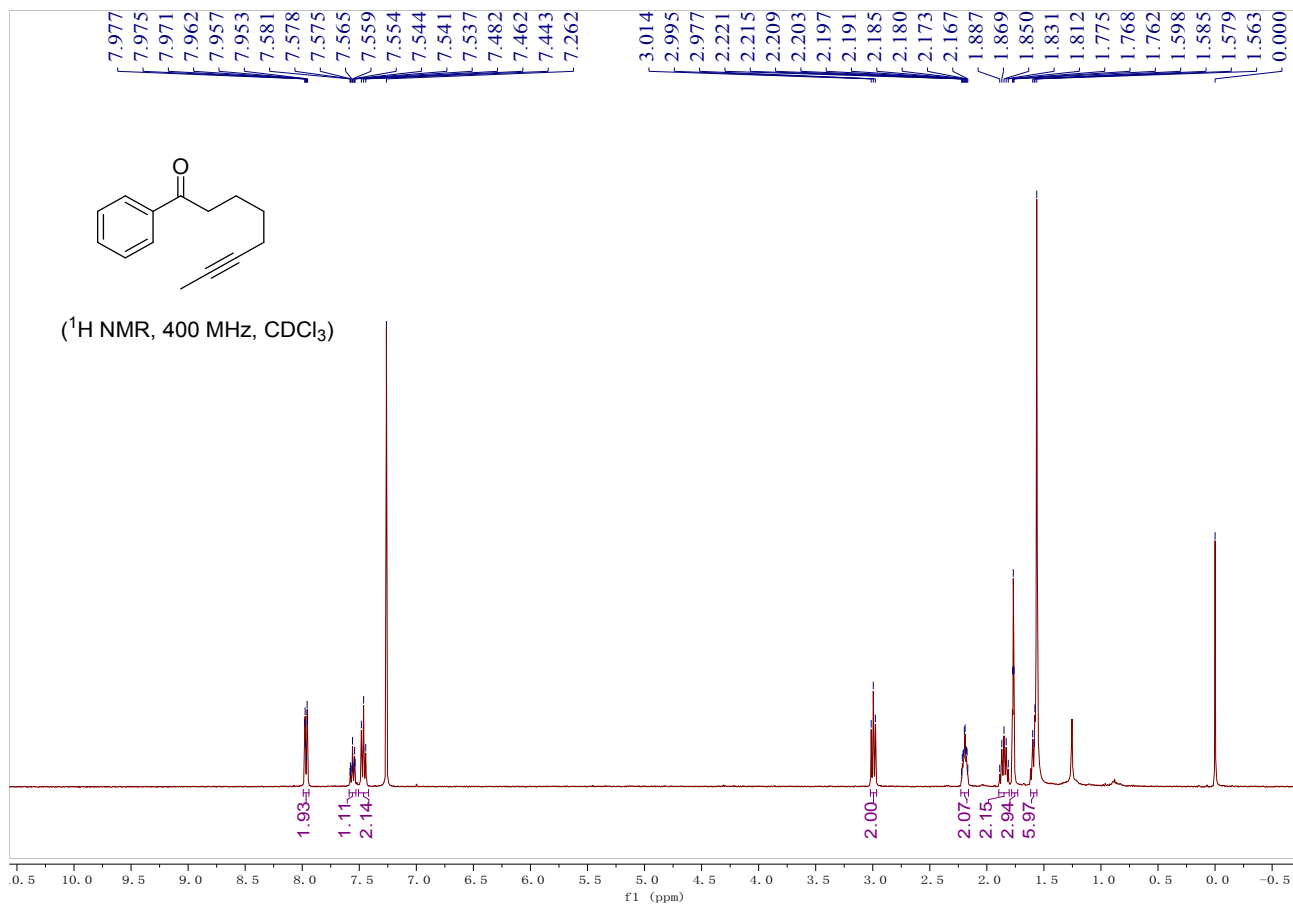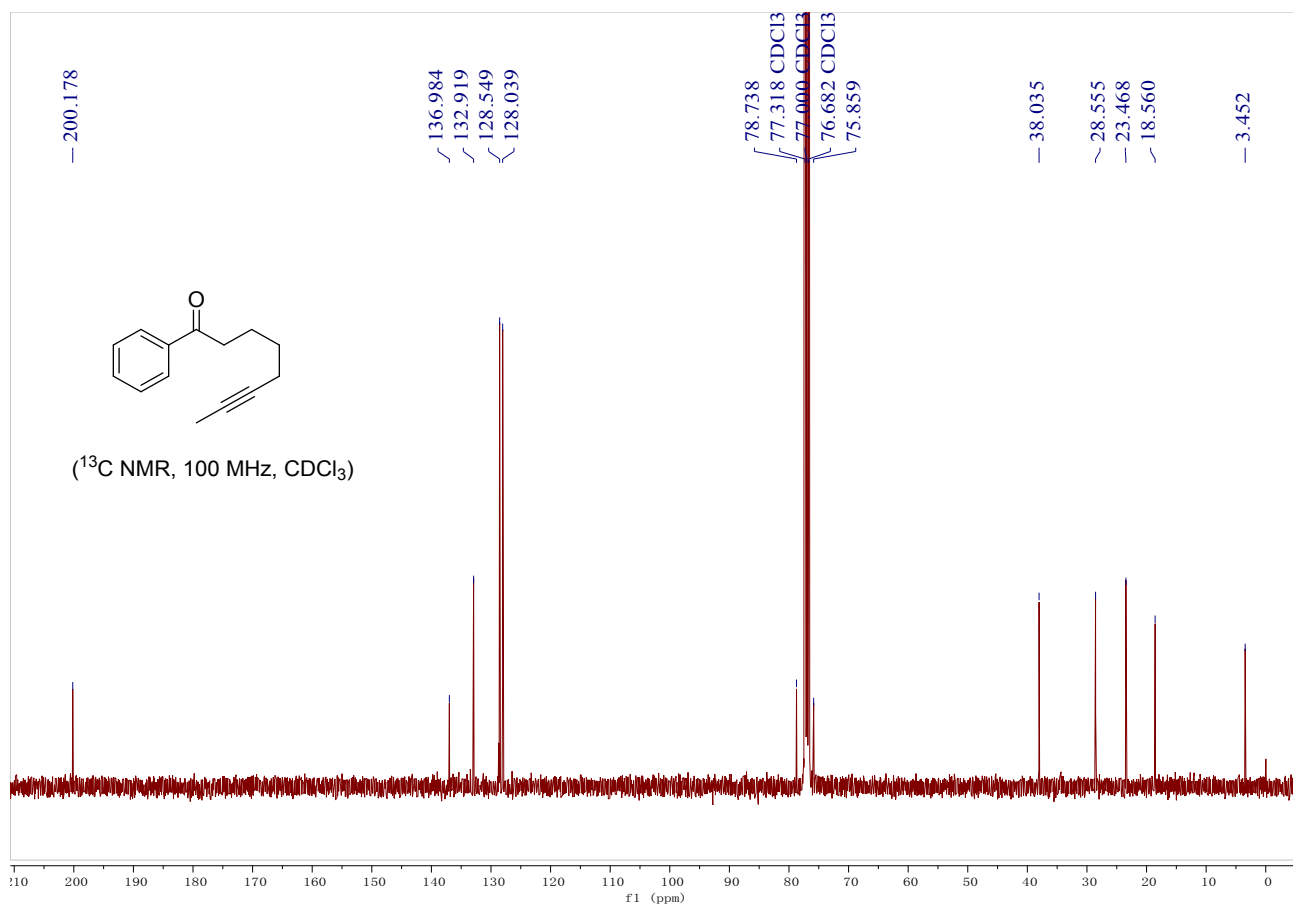

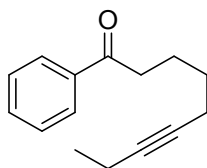

**1-phenylnon-6-yn-1-one (3ca)**: colorless oil, 38 mg, 89%, Eluent: PE/EA = 20/1.

**<sup>1</sup>H NMR** (400 MHz, CDCl<sub>3</sub>, TMS): δ 8.00-7.93 (m, 2H), 7.61-7.51 (m, 1H), 7.51-7.42 (m, 2H), 3.00 (t, *J* = 7.4 Hz, 2H), 2.25-2.18 (m, 2H), 2.18-2.11 (m, 2H), 1.89-1.81 (m, 2H), 1.65-1.52 (m, 2H), 1.10 (t, *J* = 7.4 Hz, 3H). **<sup>13</sup>C NMR** (100 MHz, CDCl<sub>3</sub>, TMS): δ 12.4, 14.3, 18.6, 23.5, 28.6, 38.1, 78.9, 82.1, 128.0, 128.6, 132.9, 137.0, 200.2. **IR** (EtOH): ν 2941, 2925, 2201, 1685, 1599, 1580, 1448, 1356, 1285, 1226, 1002, 974, 769, 732, 683 cm<sup>-1</sup>. **HRMS** (ESI) *m/z*: [M+Na]<sup>+</sup> Calcd. for C<sub>15</sub>H<sub>18</sub>ONa 237.1250; found 237.1251.

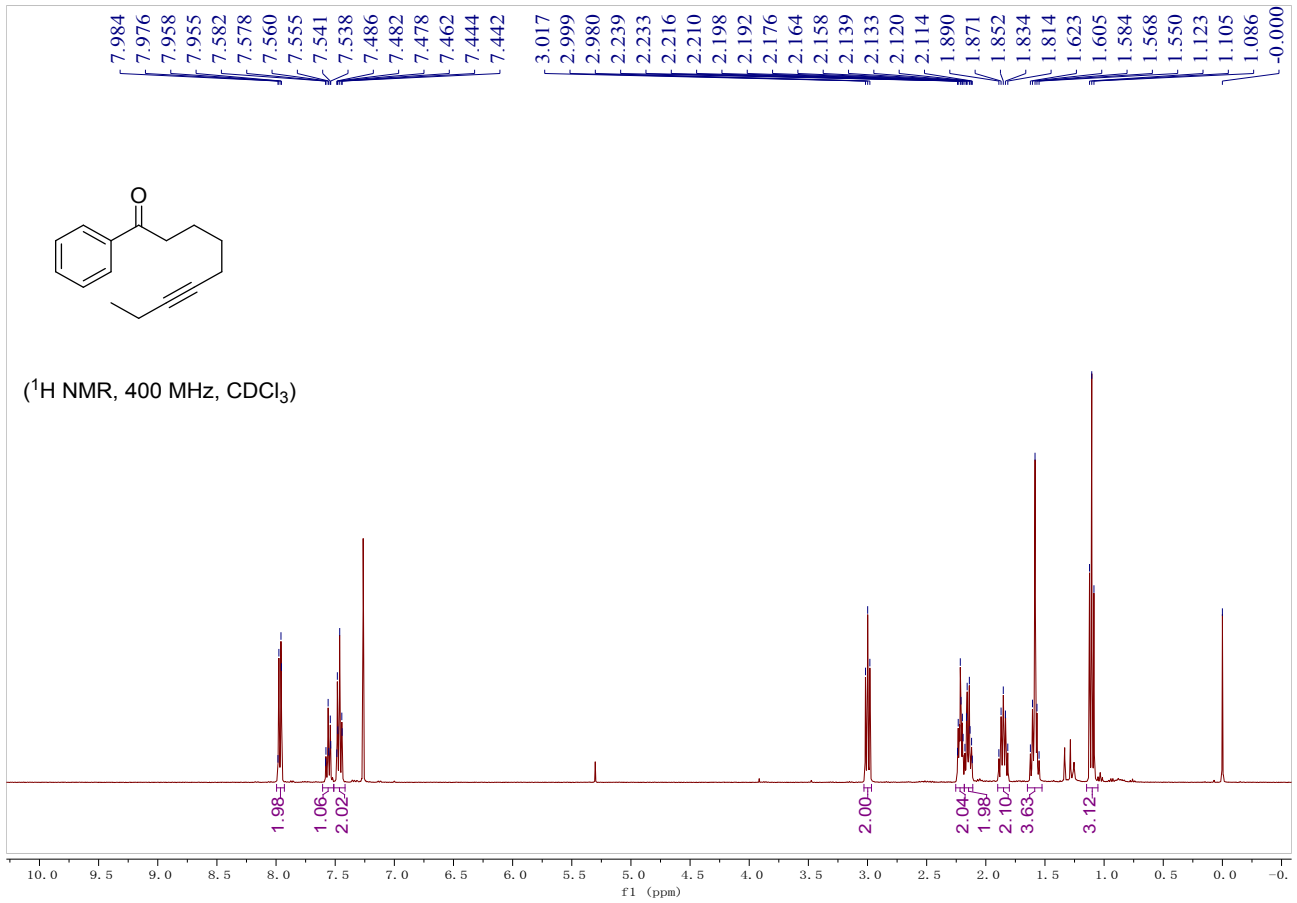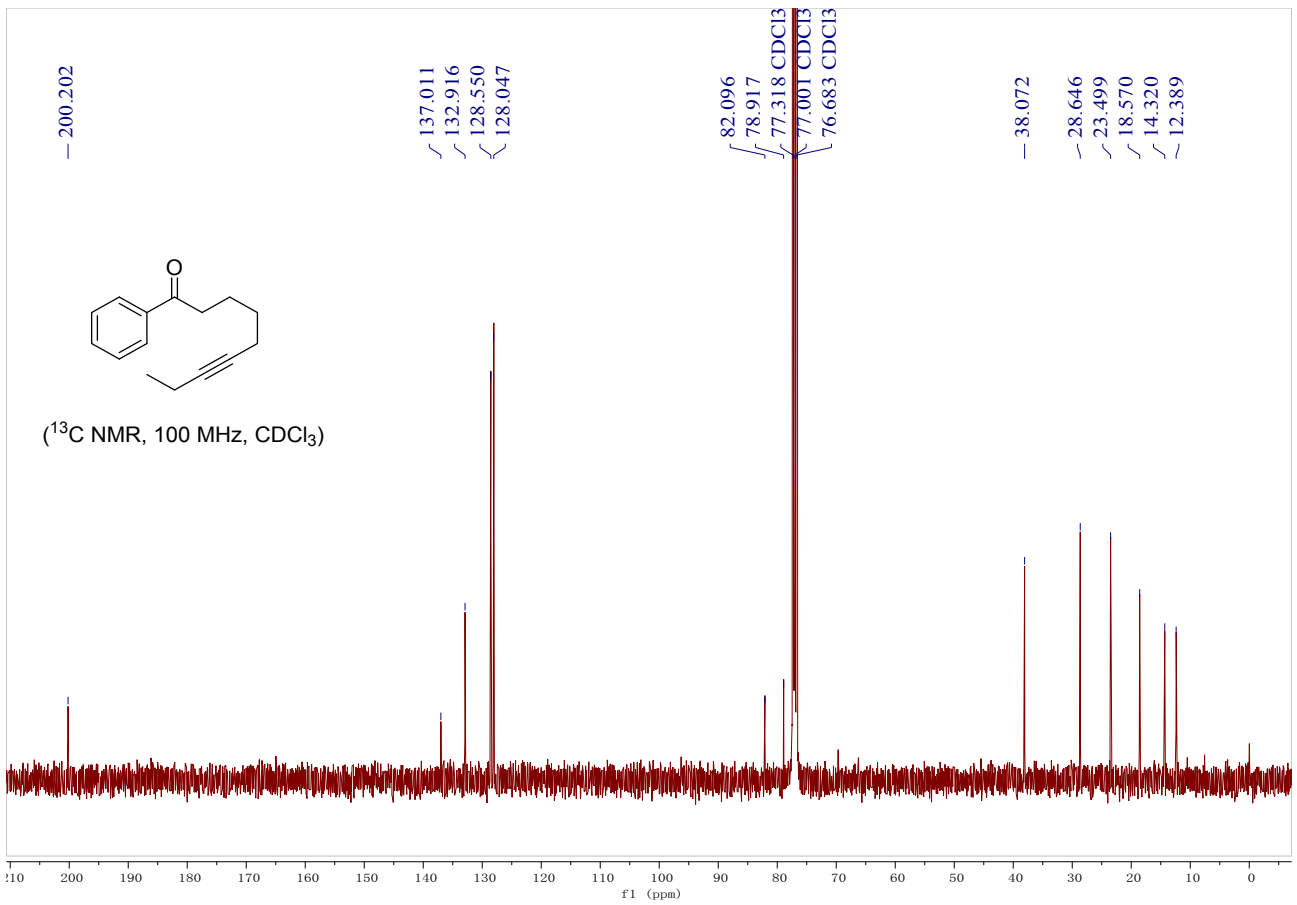

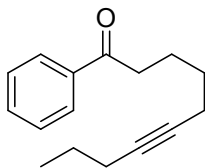

**1-phenyldec-6-yn-1-one (3da):** colorless oil, 42 mg, 92%, Eluent: PE/EA = 20/1.

**<sup>1</sup>H NMR** (400 MHz, CDCl<sub>3</sub>, TMS): δ 8.01-7.93 (m, 2H), 7.61-7.51 (m, 1H), 7.51-7.42 (m, 2H), 3.00 (t, *J* = 7.4 Hz, 2H), 2.22 (tt, *J* = 7.0, 2.4 Hz, 2H), 2.11 (tt, *J* = 7.0, 2.4 Hz, 2H), 1.92-1.79 (m, 2H), 1.63-1.54 (m, 2H), 1.49 (h, *J* = 7.2 Hz, 2H), 0.96 (t, *J* = 7.4 Hz, 3H). **<sup>13</sup>C NMR** (100 MHz, CDCl<sub>3</sub>, TMS): δ 13.5, 18.6, 20.7, 22.5, 23.5, 28.7, 38.1, 79.7, 80.5, 128.0, 128.5, 132.9, 137.0, 200.2. **IR** (EtOH): ν 2991, 2960, 2941, 2221, 1679, 1602, 1524, 1449, 1356, 1227, 1154, 1085, 1009, 851, 777, 693, 656 cm<sup>-1</sup>. **HRMS** (ESI) *m/z*: [M+H]<sup>+</sup> Calcd. for C<sub>16</sub>H<sub>21</sub>O 229.1587; found 229.1590.

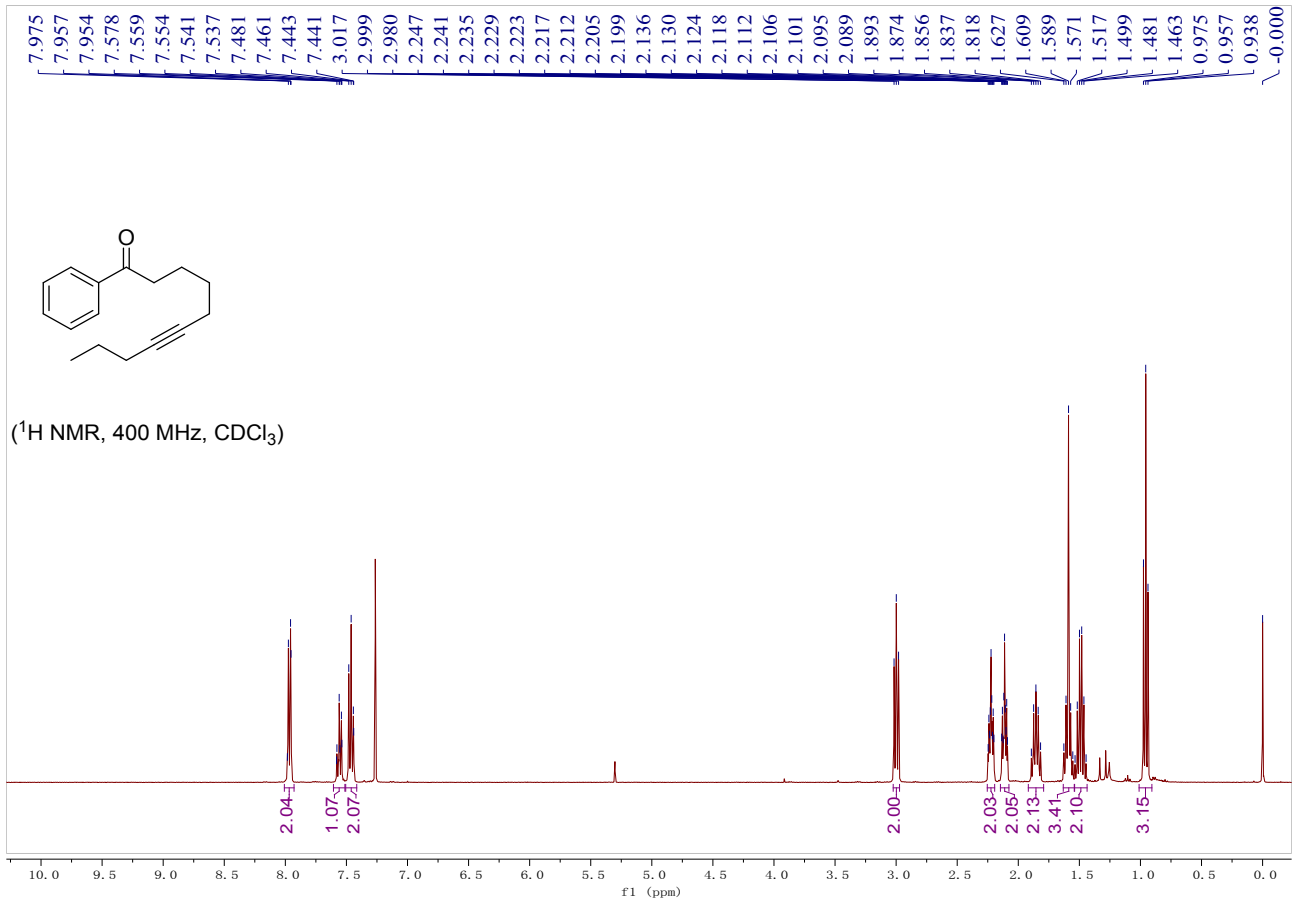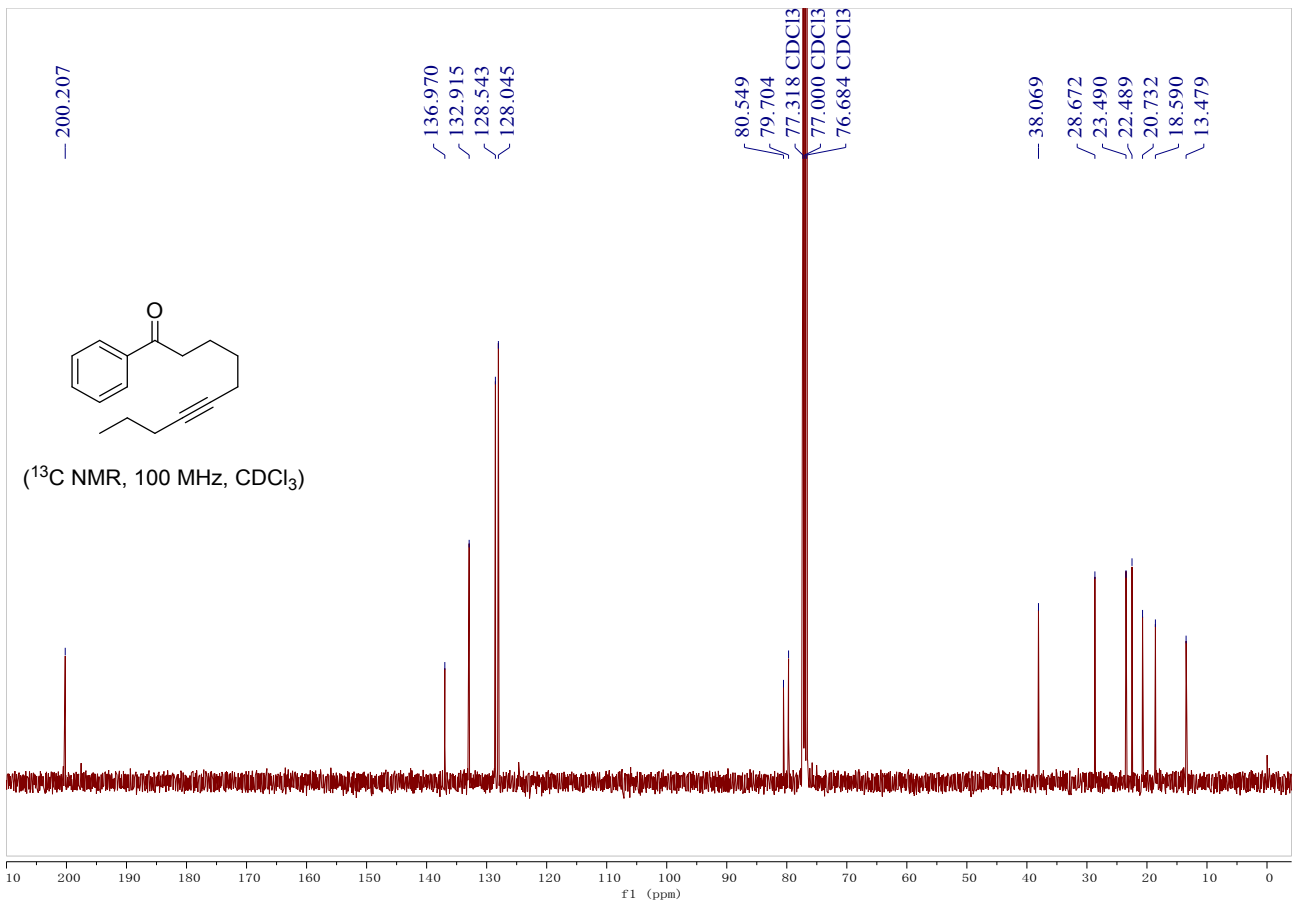



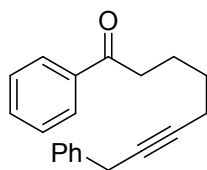

**1,8-diphenyloct-6-yn-1-one (3ea)**: colorless oil, 50 mg, 91%, Eluent: PE/EA = 20/1.

**<sup>1</sup>H NMR** (600 MHz, CDCl<sub>3</sub>, TMS): δ 7.99-7.93 (m, 2H), 7.57-7.53 (m, 1H), 7.48-7.41 (m, 2H), 7.33 (d, *J* = 7.1 Hz, 2H), 7.32-7.28 (m, 2H), 7.23-7.19 (m, 1H), 3.57 (t, *J* = 2.4 Hz, 2H), 3.01 (t, *J* = 7.4 Hz, 2H), 2.29 (tt, *J* = 7.2, 2.4 Hz, 2H), 1.91-1.85 (m, 2H), 1.67-1.60 (m, 2H). **<sup>13</sup>C NMR** (150 MHz, CDCl<sub>3</sub>, TMS): δ 18.7, 23.5, 25.1, 28.5, 38.0, 78.0, 82.0, 126.4, 127.8, 128.0, 128.4, 128.6, 132.9, 137.0, 137.5, 200.1. **IR** (EtOH): ν 2973, 2882, 2218, 1659, 1379, 1340, 1267, 1154, 1087, 1045, 861, 823, 732, 693, 680 cm<sup>-1</sup>. **HRMS** (EI) *m/z*: [M]<sup>+</sup> Calcd. for C<sub>20</sub>H<sub>19</sub>O 275.1430; found 275.1424.

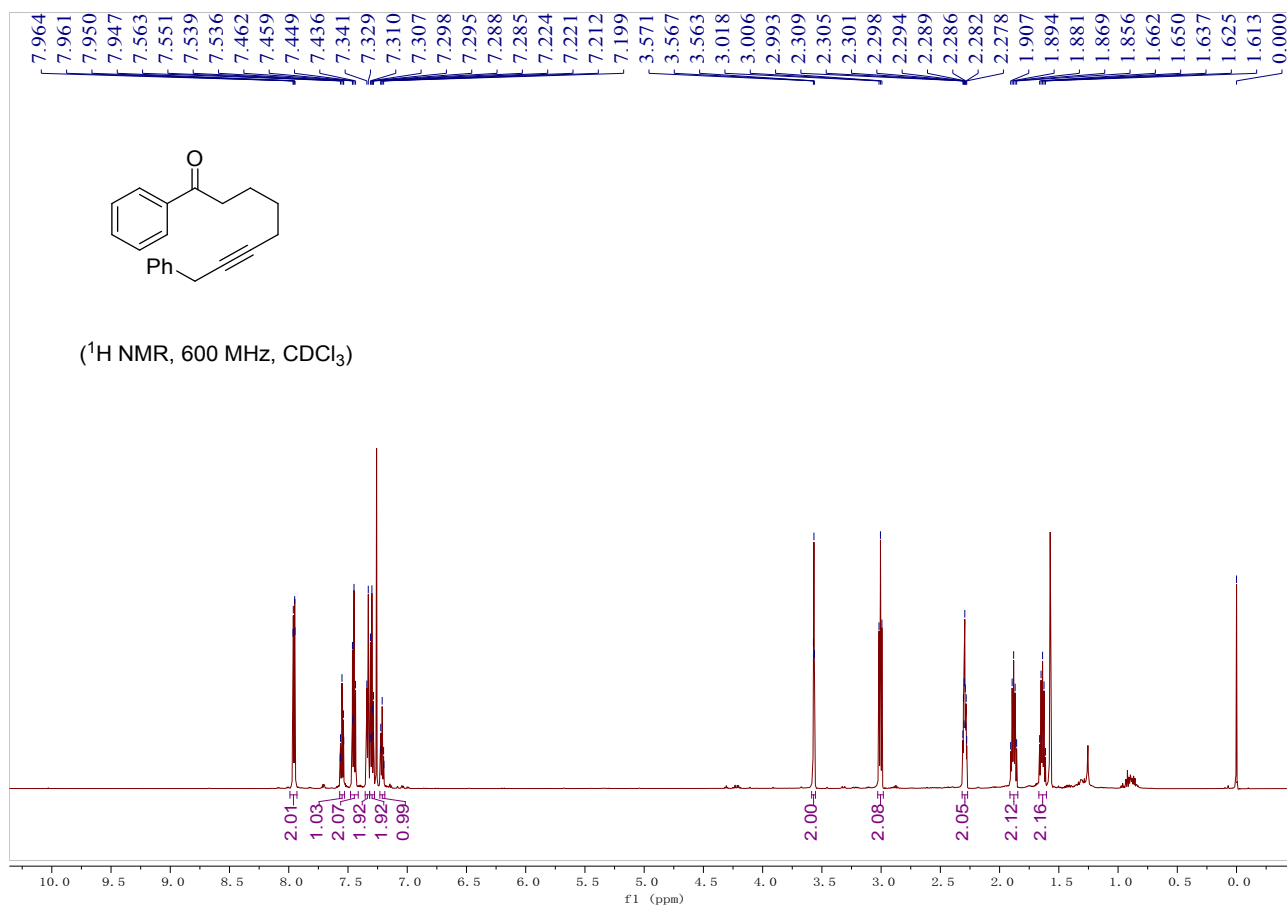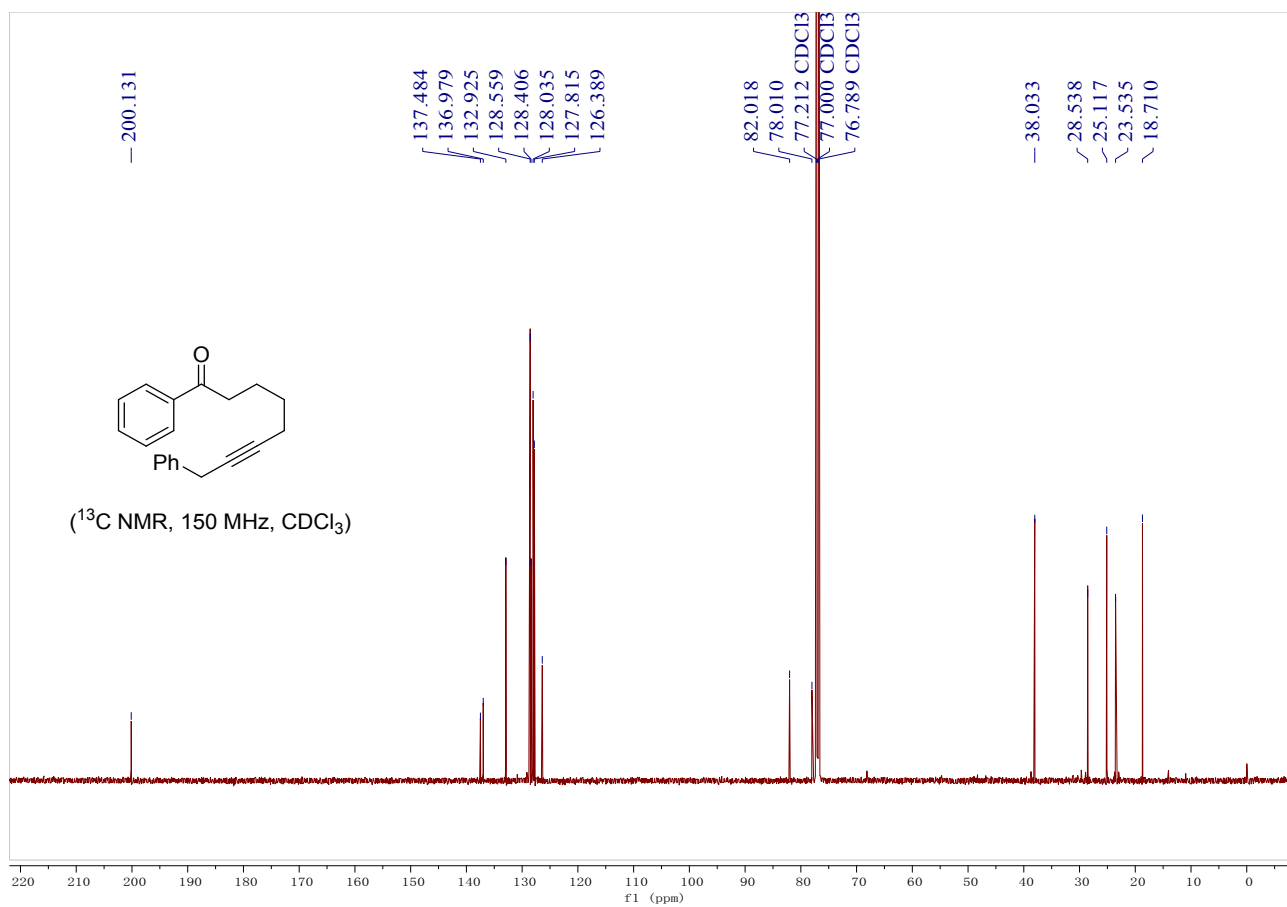

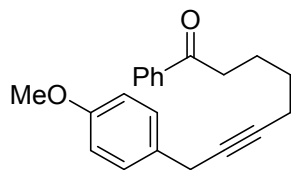

**8-(4-methoxyphenyl)-1-phenyloct-6-yn-1-one (3fa)**: colorless oil, 57 mg, 93%, Eluent: PE/EA = 20/1.

**<sup>1</sup>H NMR** (600 MHz, CDCl<sub>3</sub>, TMS): δ 7.98-7.92 (m, 2H), 7.58-7.52 (m, 1H), 7.48-7.42 (m, 2H), 7.24 (d, *J* = 8.8 Hz, 2H), 6.84 (d, *J* = 8.8 Hz, 2H), 3.79 (s, 3H), 3.50 (t, *J* = 2.4 Hz, 2H), 3.00 (t, *J* = 7.4 Hz, 2H), 2.28 (tt, *J* = 7.2, 2.4 Hz, 2H), 1.91-1.84 (m, 2H), 1.66-1.60 (m, 2H). **<sup>13</sup>C NMR** (150 MHz, CDCl<sub>3</sub>, TMS): δ 18.7, 23.5, 24.2, 28.5, 38.0, 55.3, 78.5, 81.7, 113.8, 128.0, 128.6, 128.8, 129.6, 132.9, 137.0, 158.2, 200.1. **IR** (EtOH): ν 2972, 2899, 2881, 2219, 1682, 1424, 1399, 1379, 1345, 1327, 1209, 1084, 1002, 861, 729, 693 cm<sup>-1</sup>. **HRMS** (EI) *m/z*: [M]<sup>+</sup> Calcd. for C<sub>21</sub>H<sub>22</sub>O<sub>2</sub> 306.1614; found 306.1610.

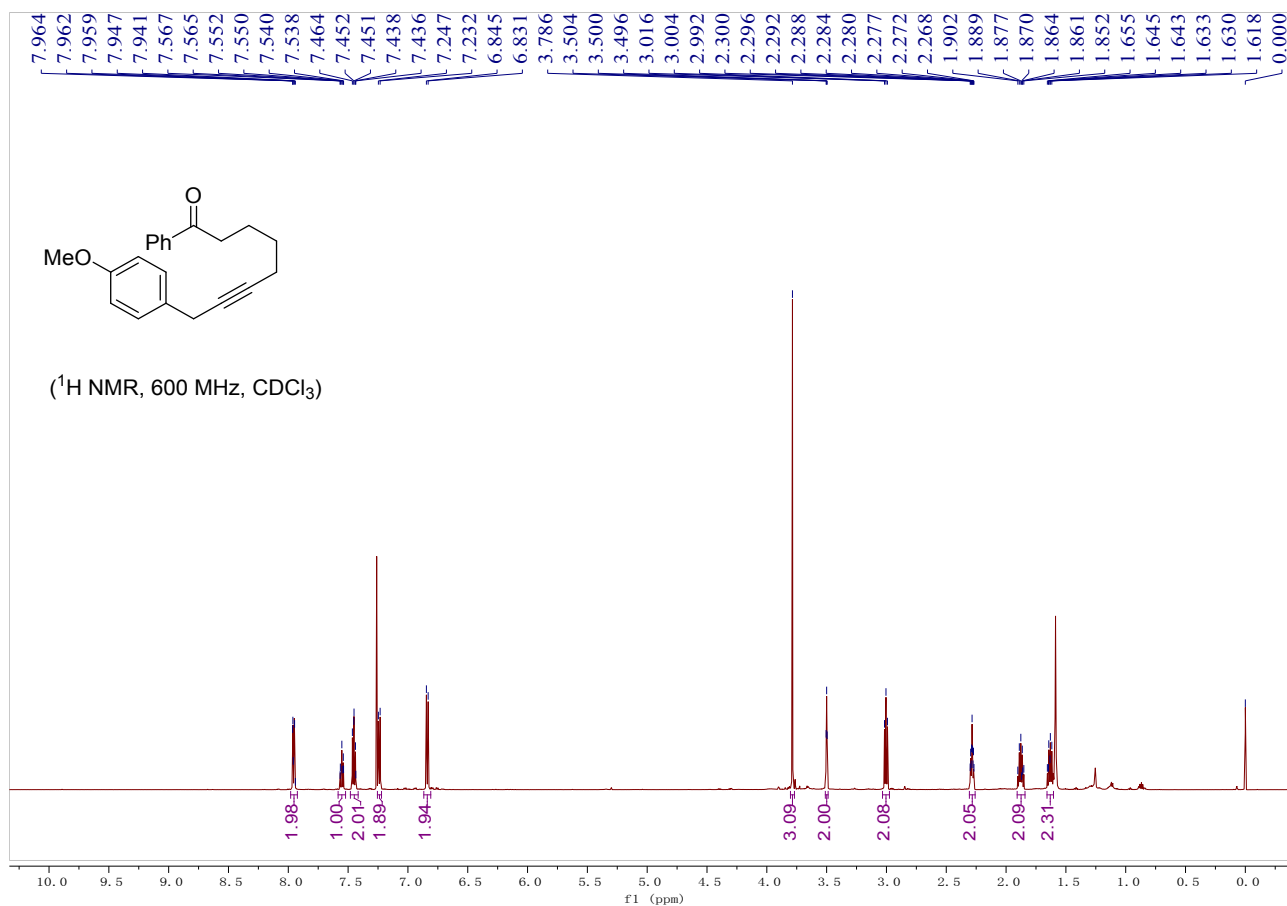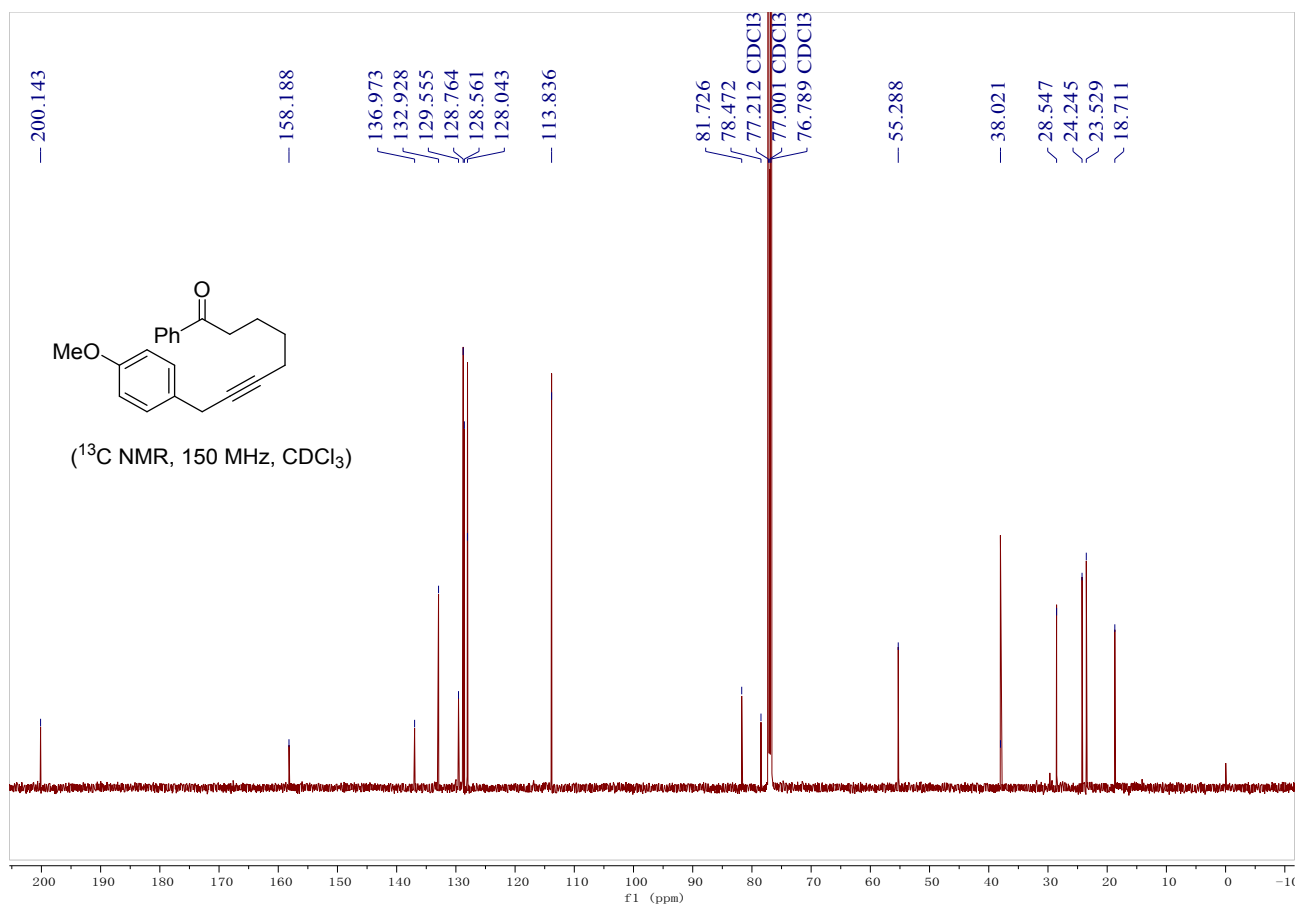

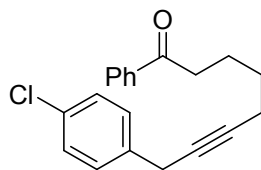

**8-(4-chlorophenyl)-1-phenyloct-6-yn-1-one (3ga)**: colorless oil, 56 mg, 90%, Eluent: PE/EA = 20/1.

**<sup>1</sup>H NMR** (400 MHz, CDCl<sub>3</sub>, TMS): δ 7.99-7.92 (m, 2H), 7.61-7.51 (m, 1H), 7.49-7.42 (m, 2H), 7.26 (s, 4H), 3.53 (t, *J* = 2.4 Hz, 2H), 3.01 (t, *J* = 7.2 Hz, 2H), 2.29 (tt, *J* = 7.0, 2.4 Hz, 2H), 1.92-1.83 (m, 2H), 1.67-1.58 (m, 2H). **<sup>13</sup>C NMR** (150 MHz, CDCl<sub>3</sub>, TMS): δ 18.7, 23.5, 24.6, 28.5, 38.0, 77.5, 82.5, 128.0, 128.5, 128.6, 129.2, 132.1, 133.0, 136.0, 137.0, 200.0. **IR** (EtOH): ν 2973, 2883, 2870, 2217, 1654, 1424, 1380, 1328, 1087, 1045, 880, 737, 634 cm<sup>-1</sup>. **HRMS** (EI) *m/z*: [M]<sup>+</sup> Calcd. for C<sub>20</sub>H<sub>18</sub>OCl 309.1041; found 309.1036.

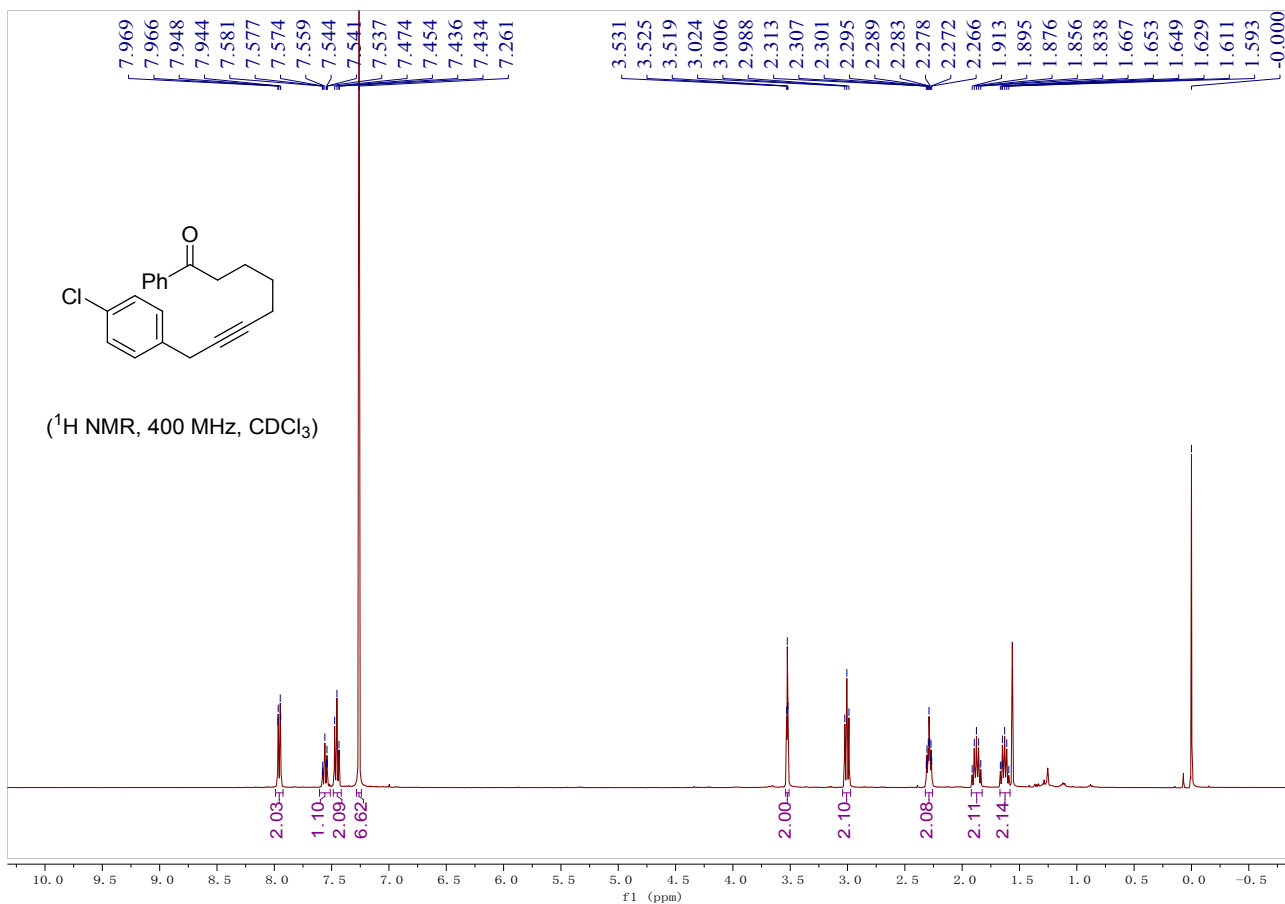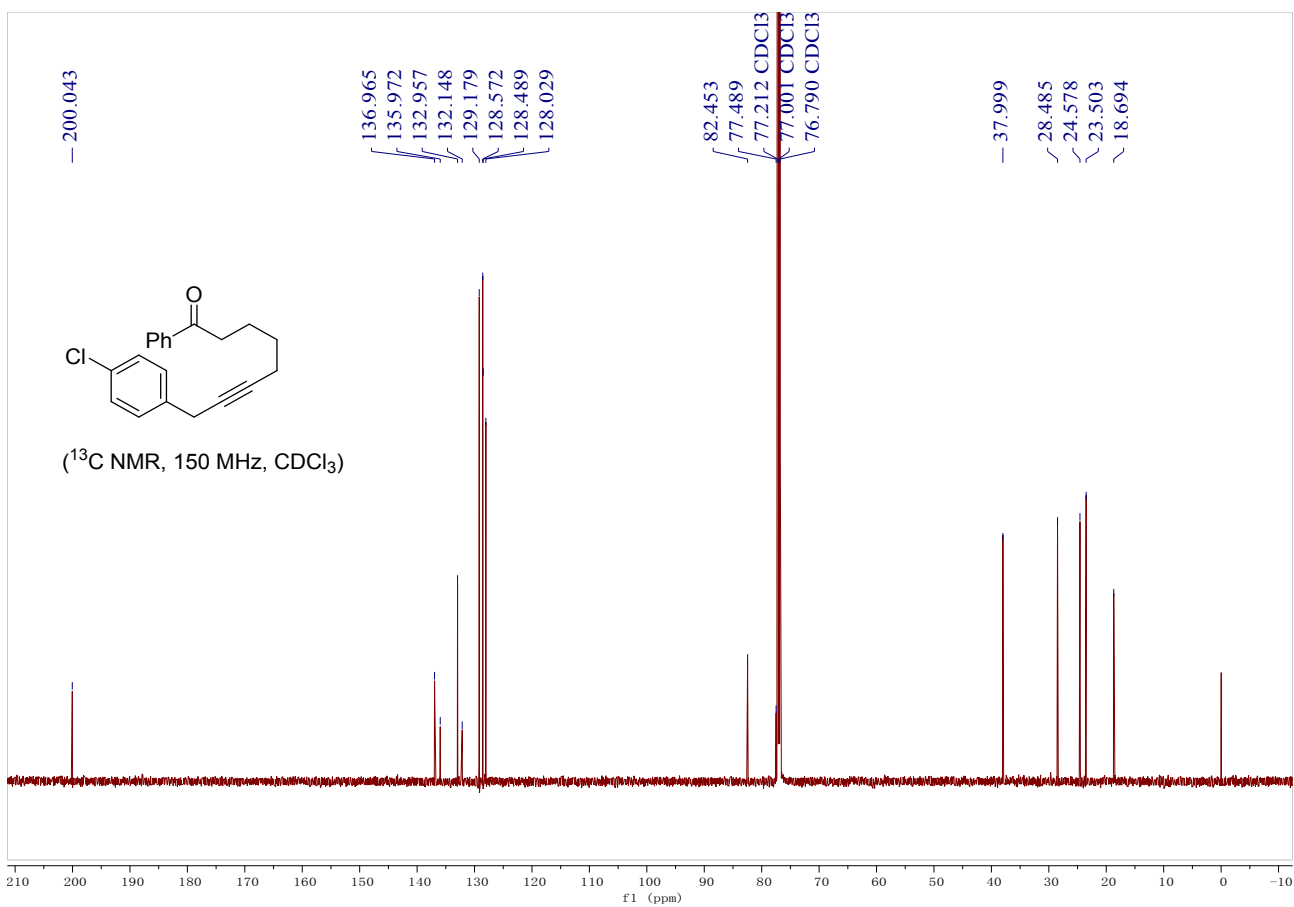

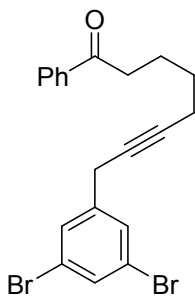

**8-(3,5-dibromophenyl)-1-phenyloct-6-yn-1-one (3ha)**: colorless oil, 77 mg, 89%, Eluent: PE/EA = 20/1.

**<sup>1</sup>H NMR** (600 MHz, CDCl<sub>3</sub>, TMS): δ 7.98-7.93 (m, 2H), 7.57-7.54 (m, 1H), 7.52 (t, *J* = 2.0 Hz, 1H), 7.47-7.44 (m, 2H), 7.42 (dd, *J* = 1.8, 0.9 Hz, 2H), 3.51 (t, *J* = 2.6 Hz, 2H), 3.02 (t, *J* = 7.2 Hz, 2H), 2.30 (tt, *J* = 7.0, 2.4 Hz, 2H), 1.88 (tt, *J* = 7.6, 6.4 Hz, 2H), 1.68-1.61 (m, 2H). **<sup>13</sup>C NMR** (150 MHz, CDCl<sub>3</sub>, TMS): δ 18.7, 22.7, 24.6, 28.4, 38.0, 76.2, 83.5, 122.8, 128.0, 128.6, 129.8, 132.2, 133.0, 137.0, 141.4, 200.0. **IR** (EtOH): ν 3026, 2942, 2862, 2115, 1682, 1597, 1448, 1367, 1223, 1180, 1002, 988, 880 cm<sup>-1</sup>. **HRMS** (ESI) *m/z*: [M+Na]<sup>+</sup> Calcd. for C<sub>20</sub>H<sub>18</sub>OBr<sub>2</sub>Na 456.9596; found 456.9605.

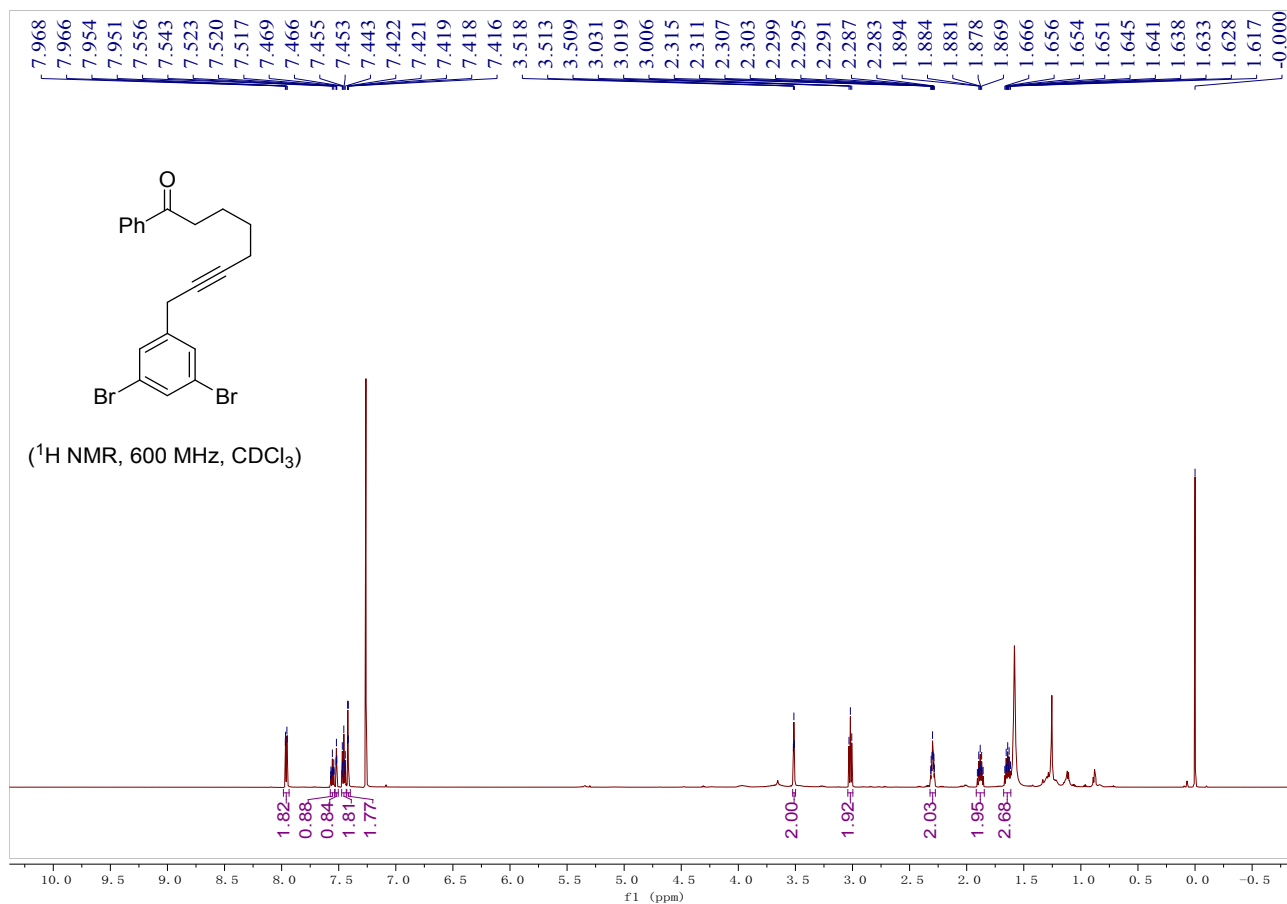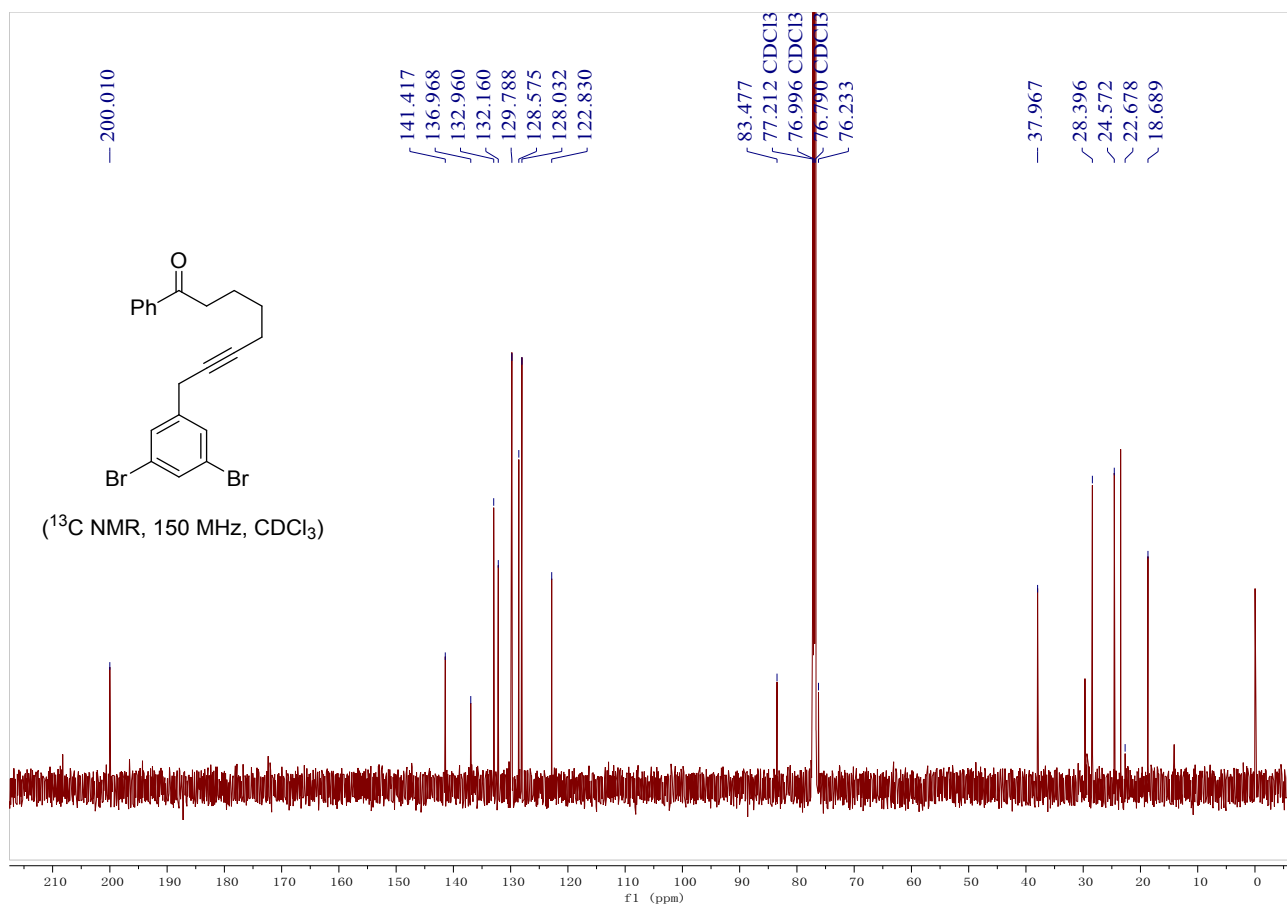



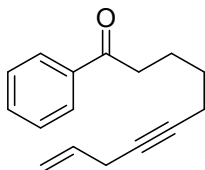

**1-phenyldec-9-en-6-yn-1-one (3ia)**: colorless oil, 36 mg, 80%, Eluent: PE/EA = 20/1.

**<sup>1</sup>H NMR** (400 MHz, CDCl<sub>3</sub>, TMS): δ 8.00-7.93 (m, 2H), 7.59-7.53 (m, 1H), 7.49-7.42 (m, 2H), 5.81 (ddt, *J* = 15.6, 10.2, 5.2 Hz, 1H), 5.30 (dt, *J* = 17.0, 2.0 Hz, 1H), 5.08 (dd, *J* = 10.0, 2.0 Hz, 1H), 3.04-2.88 (m, 4H), 2.26 (t, *J* = 7.0 Hz, 2H), 1.87 (p, *J* = 7.6 Hz, 2H), 1.68-1.56 (m, 2H). **<sup>13</sup>C NMR** (150 MHz, CDCl<sub>3</sub>, TMS): δ 18.6, 23.1, 23.5, 28.6, 38.0, 77.0, 82.2, 115.6, 128.0, 128.6, 132.9, 133.3, 137.0, 200.1. **IR** (EtOH): ν 2973, 2918, 2890, 2128, 1920, 1655, 1450, 1379, 1323, 1087, 1045, 880, 799, 702, 689 cm<sup>-1</sup>. **HRMS** (ESI) *m/z*: [M+H]<sup>+</sup> Calcd. for C<sub>16</sub>H<sub>19</sub>O 227.1430; found 227.1431.

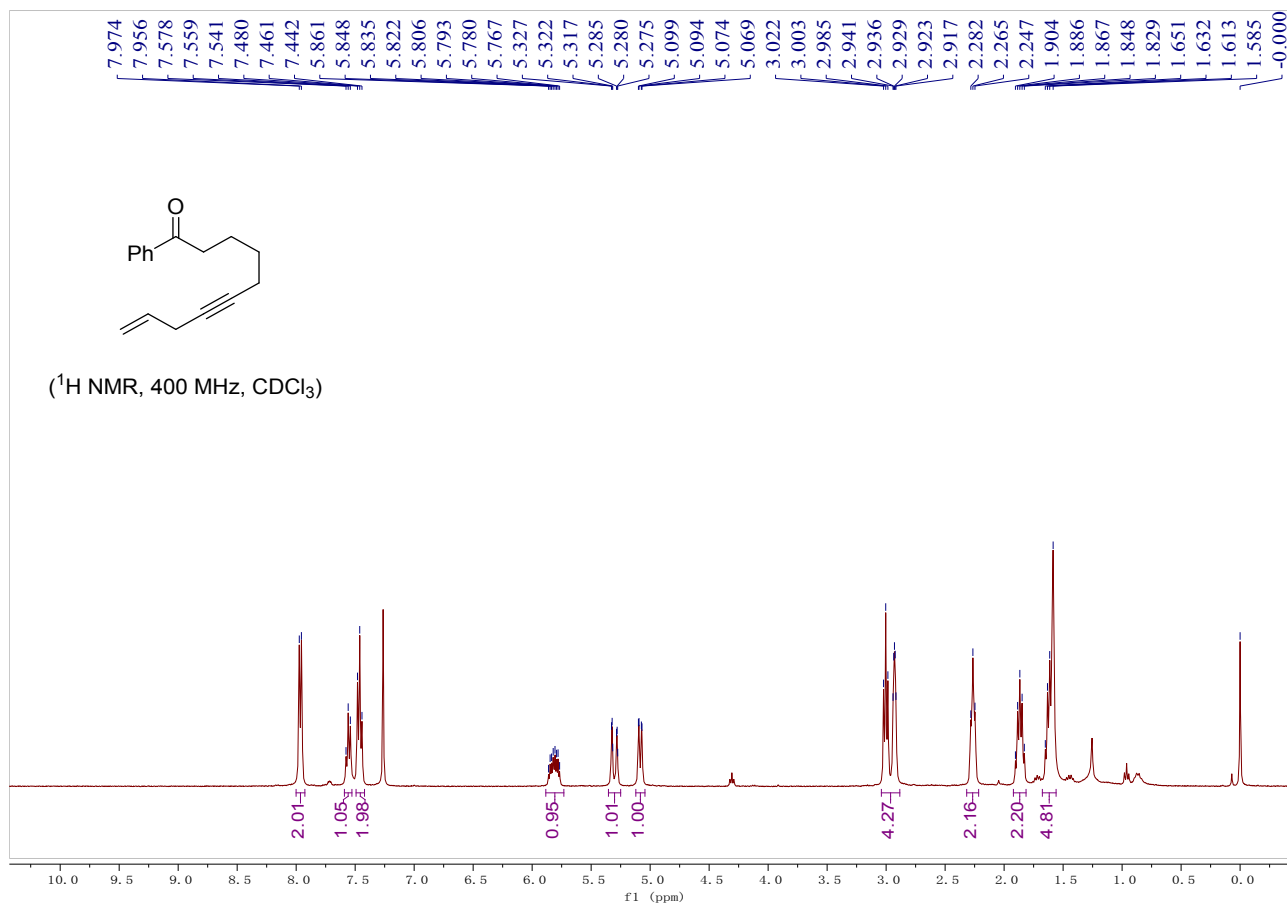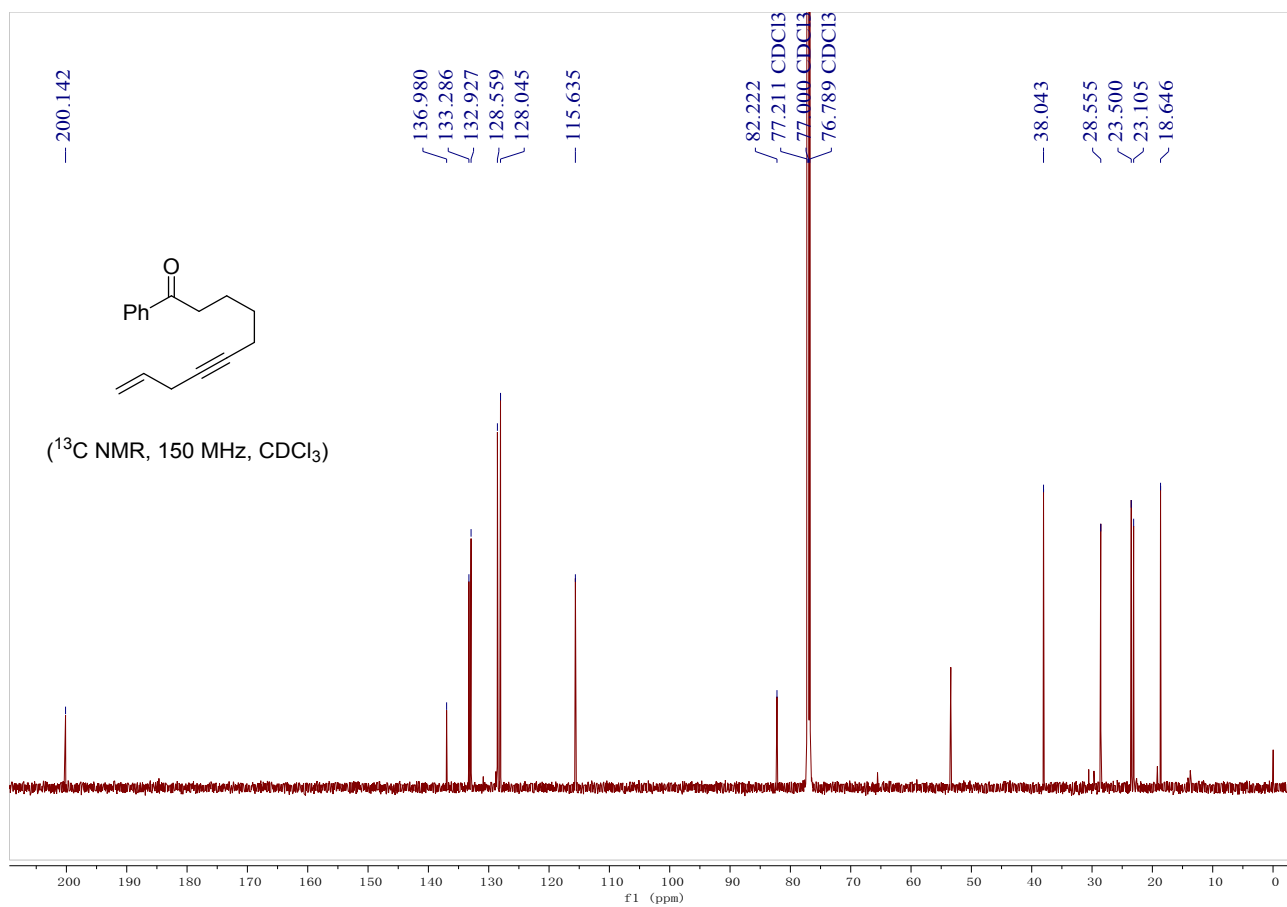

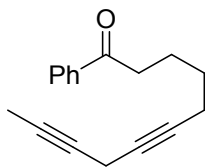

**1-phenylundeca-6,9-diyne-1-one (3ja):** colorless oil, 39 mg, 82%, Eluent: PE/EA = 20/1.

**<sup>1</sup>H NMR** (400 MHz, CDCl<sub>3</sub>, TMS): δ 7.98-7.93 (m, 2H), 7.59-7.53 (m, 1H), 7.49-7.43 (m, 2H), 3.11-3.05 (m, 2H), 2.99 (t, *J* = 7.4 Hz, 2H), 2.23 (tt, *J* = 7.2, 2.4 Hz, 2H), 1.89-1.80 (m, 2H), 1.78 (t, *J* = 2.4 Hz, 3H), 1.64-1.55 (m, 2H). **<sup>13</sup>C NMR** (100 MHz, CDCl<sub>3</sub>, TMS): δ 3.5, 9.6, 18.6, 23.4, 28.2, 38.0, 73.5, 74.8, 75.9, 79.9, 128.0, 128.5, 132.9, 136.9, 200.1. **IR** (EtOH): ν 2972, 2925, 2870, 2201, 1678, 1597, 1449, 1376, 1223, 1085, 1045, 879, 751, 691 cm<sup>-1</sup>. **HRMS** (EI) *m/z*: [M]<sup>+</sup> Calcd. for C<sub>17</sub>H<sub>17</sub>O 237.1274; found 237.1266.

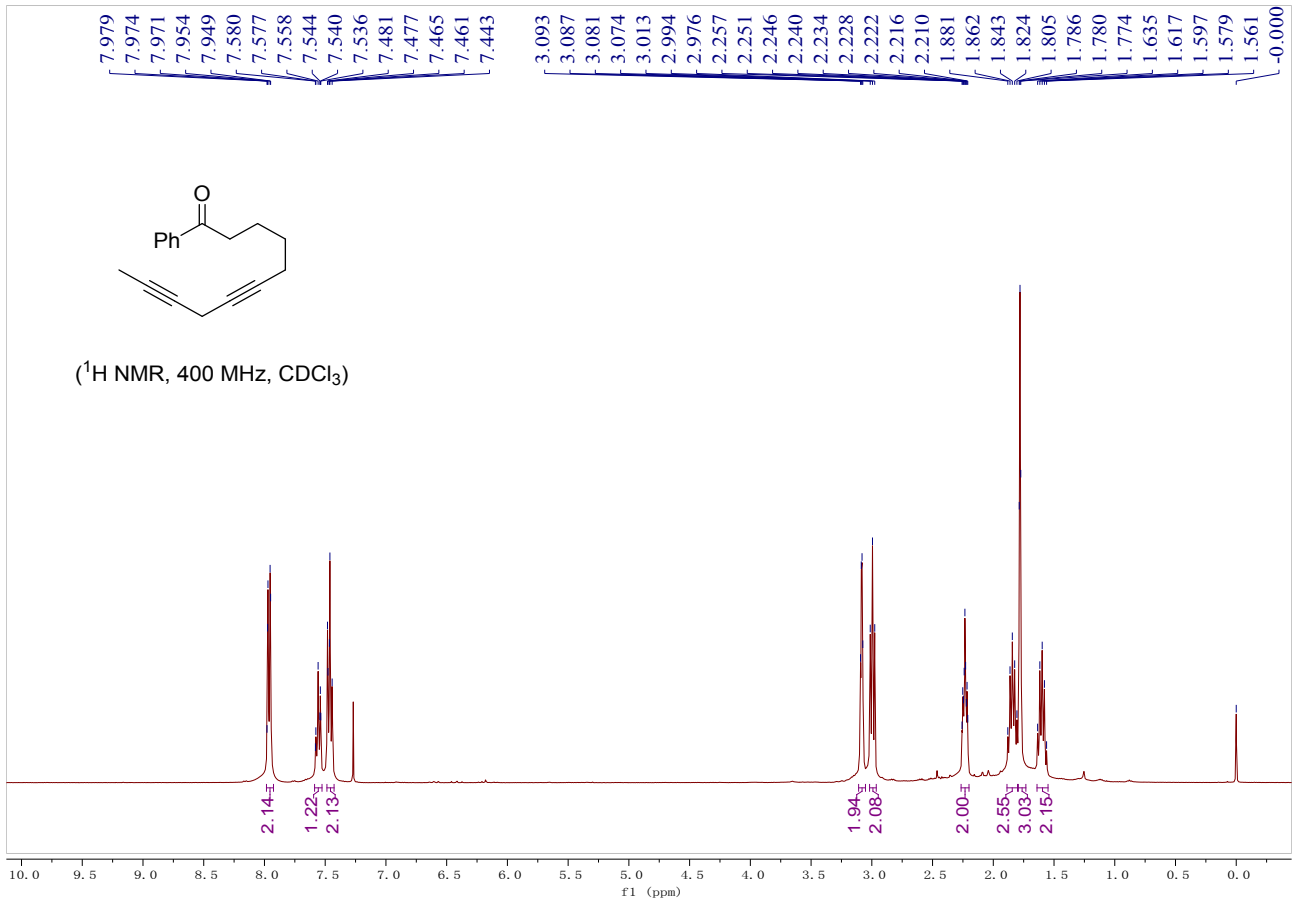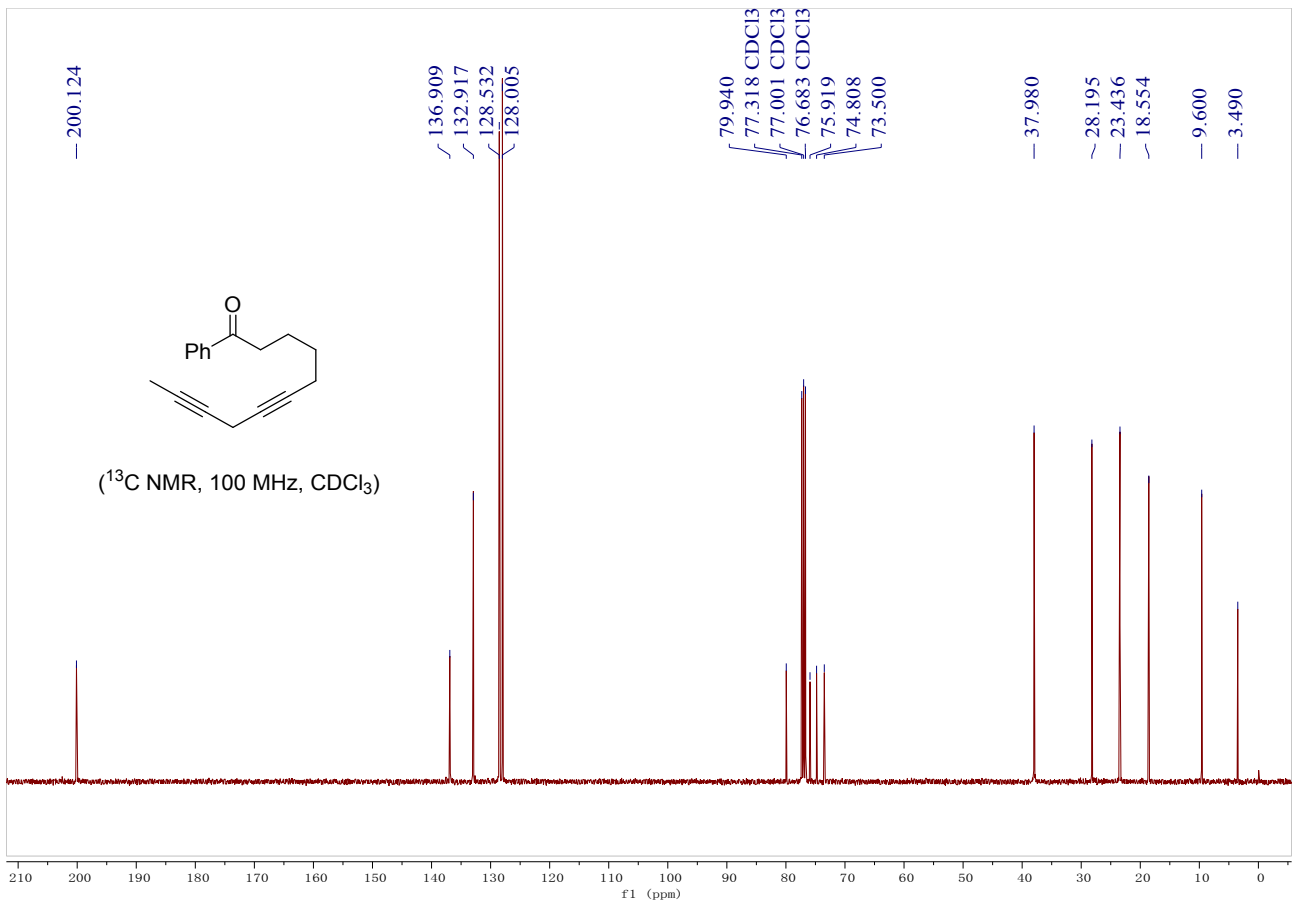

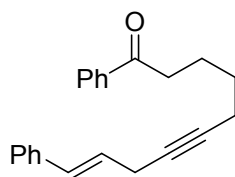

**(E)-1,9-diphenylnon-8-en-6-yn-1-one (3ka)**: colorless oil, 54 mg, 94%, Eluent: PE/EA = 20/1.

**<sup>1</sup>H NMR** (400 MHz, CDCl<sub>3</sub>, TMS): δ 7.99-7.94 (m, 2H), 7.58-7.52 (m, 1H), 7.47-7.42 (m, 2H), 7.37-7.33 (m, 2H), 7.32-7.27 (m, 2H), 7.23-7.18 (m, 1H), 6.62 (dt, *J* = 15.8, 2.0 Hz, 1H), 6.17 (dt, *J* = 15.8, 5.6 Hz, 1H), 3.10 (dq, *J* = 4.4, 2.2 Hz, 2H), 3.02 (t, *J* = 7.2 Hz, 2H), 2.30 (tt, *J* = 7.2, 2.4 Hz, 2H), 1.94-1.85 (m, 2H), 1.69-1.60 (m, 2H). **<sup>13</sup>C NMR** (150 MHz, CDCl<sub>3</sub>, TMS): δ 18.7, 22.4, 23.5, 28.5, 38.0, 82.3, 125.2, 126.2, 127.2, 128.0, 128.5, 128.6, 130.9, 132.9, 137.0, 137.2, 200.1. **IR** (EtOH): ν 2924, 2890, 2199, 1681, 1595, 1449, 1368, 1284, 1221, 1004, 965, 749, 693 cm<sup>-1</sup>. **HRMS** (ESI) *m/z*: [M+H]<sup>+</sup> Calcd. for C<sub>21</sub>H<sub>21</sub>O 289.1587; found 289.1589.

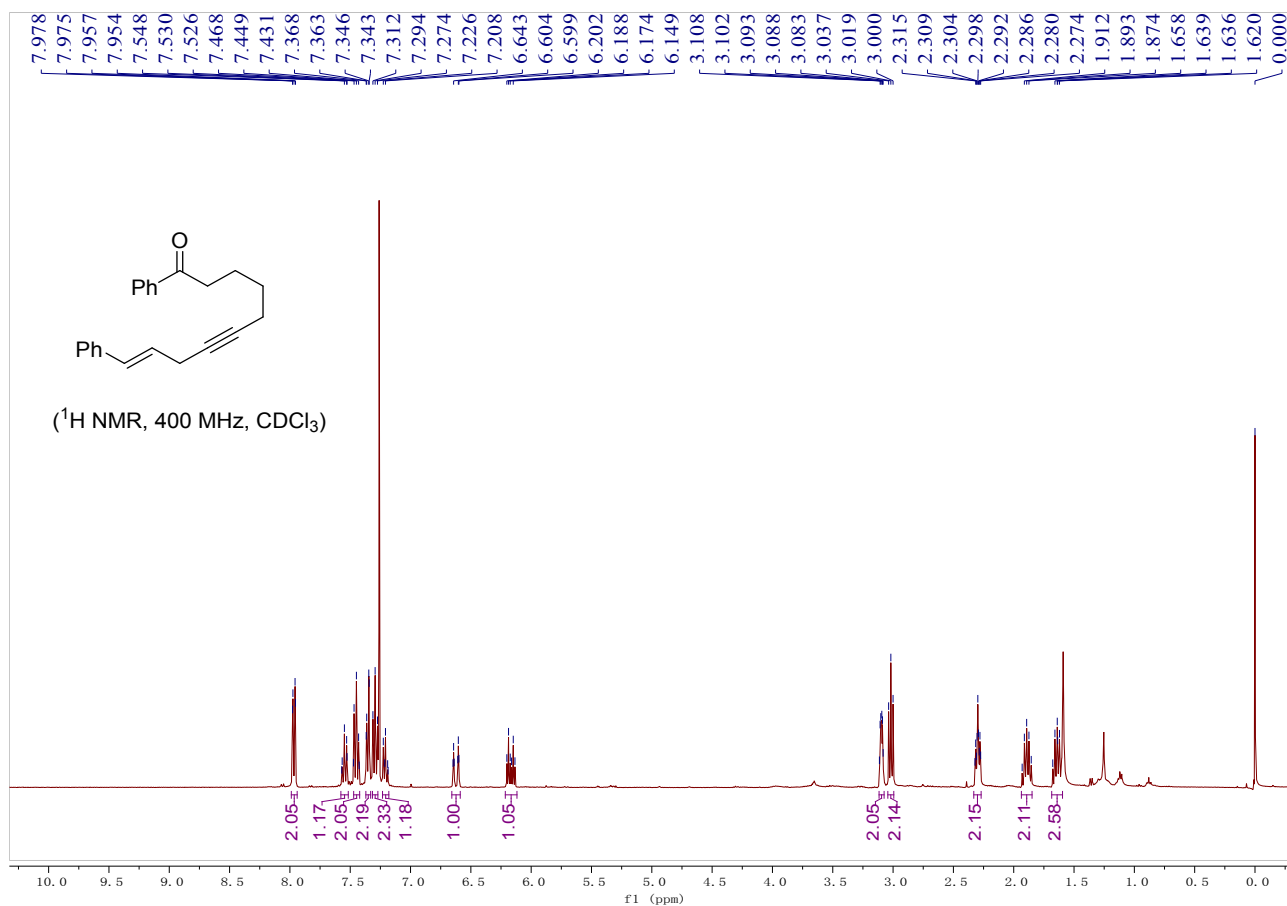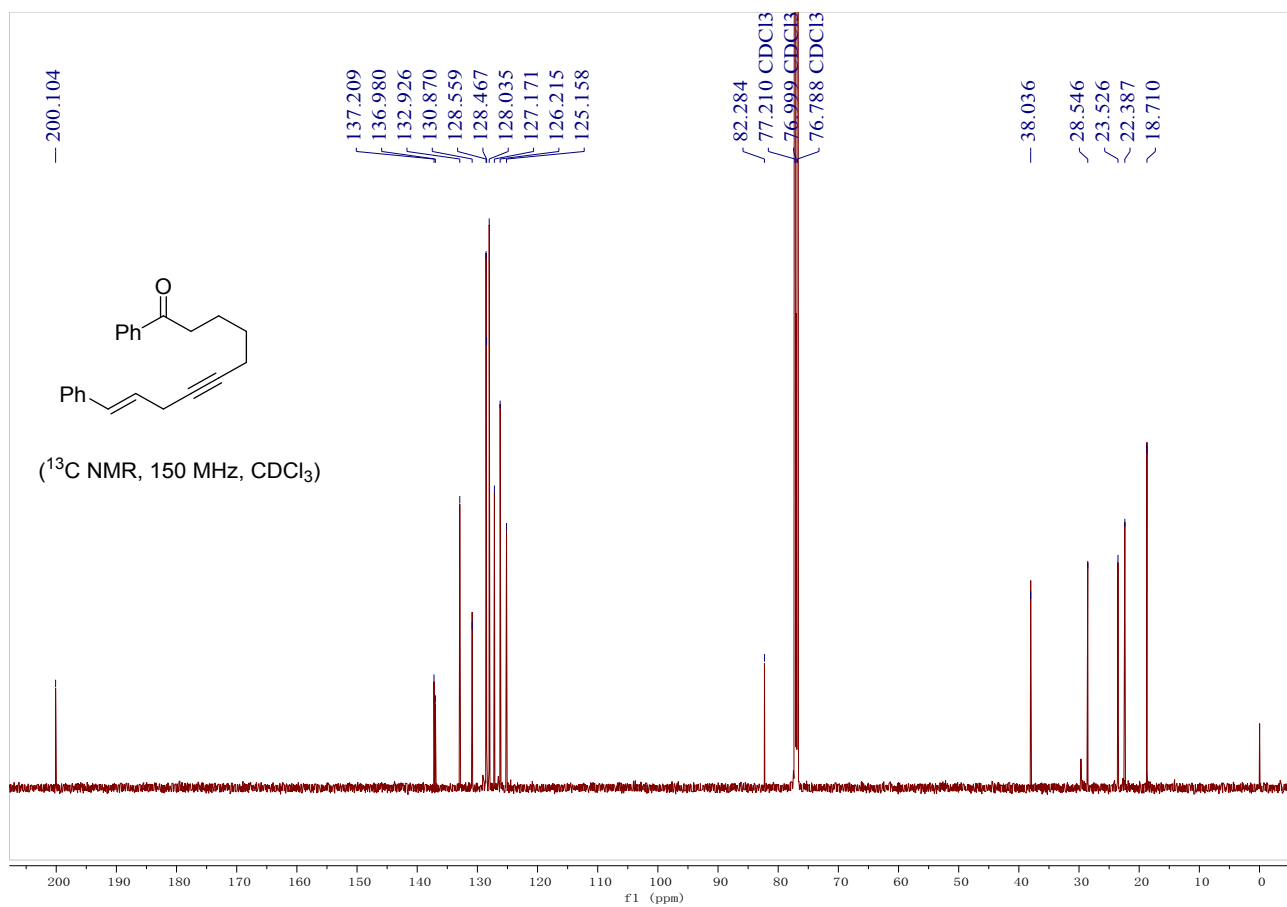

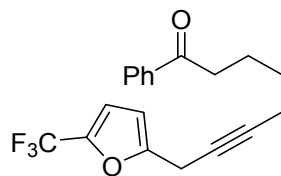

**1-phenyl-8-(5-(trifluoromethyl)furan-2-yl)oct-6-yn-1-one (3la):** colorless oil, 57 mg, 85%,  
Eluent: PE/EA = 20/1.

**<sup>1</sup>H NMR** (600 MHz, CDCl<sub>3</sub>, TMS): δ 7.98-7.93 (m, 2H), 7.59-7.54 (m, 1H), 7.48-7.43 (m, 2H), 6.70 (dd, *J* = 3.2, 1.2 Hz, 1H), 6.28 (dd, *J* = 3.2, 1.2 Hz, 1H), 3.57 (s, 2H), 3.01 (t, *J* = 7.2 Hz, 2H), 2.27 (tt, *J* = 7.0, 2.4 Hz, 2H), 1.87 (tt, *J* = 7.6, 6.4 Hz, 2H), 1.65-1.60 (m, 2H). **<sup>13</sup>C NMR** (150 MHz, CDCl<sub>3</sub>, TMS): δ 18.6, 18.9, 23.4, 28.3, 37.9, 73.8, 82.4, 107.1, 112.5, 119.1 (q, *J* = 220.6 Hz), 128.0, 128.6, 133.0, 137.0, 140.8 (q, *J* = 35.6 Hz), 154.5, 200.0. **<sup>19</sup>F NMR** (564 MHz, CDCl<sub>3</sub>): δ -64.0; **IR** (EtOH): ν 2975, 2925, 2895, 2201, 1651, 1457, 1382, 1327, 1086, 1044, 879, 788, 632 cm<sup>-1</sup>. **HRMS** (EI) *m/z*: [M]<sup>+</sup> Calcd. for C<sub>19</sub>H<sub>17</sub>O<sub>2</sub>F<sub>3</sub> 334.1175; found 334.1165.

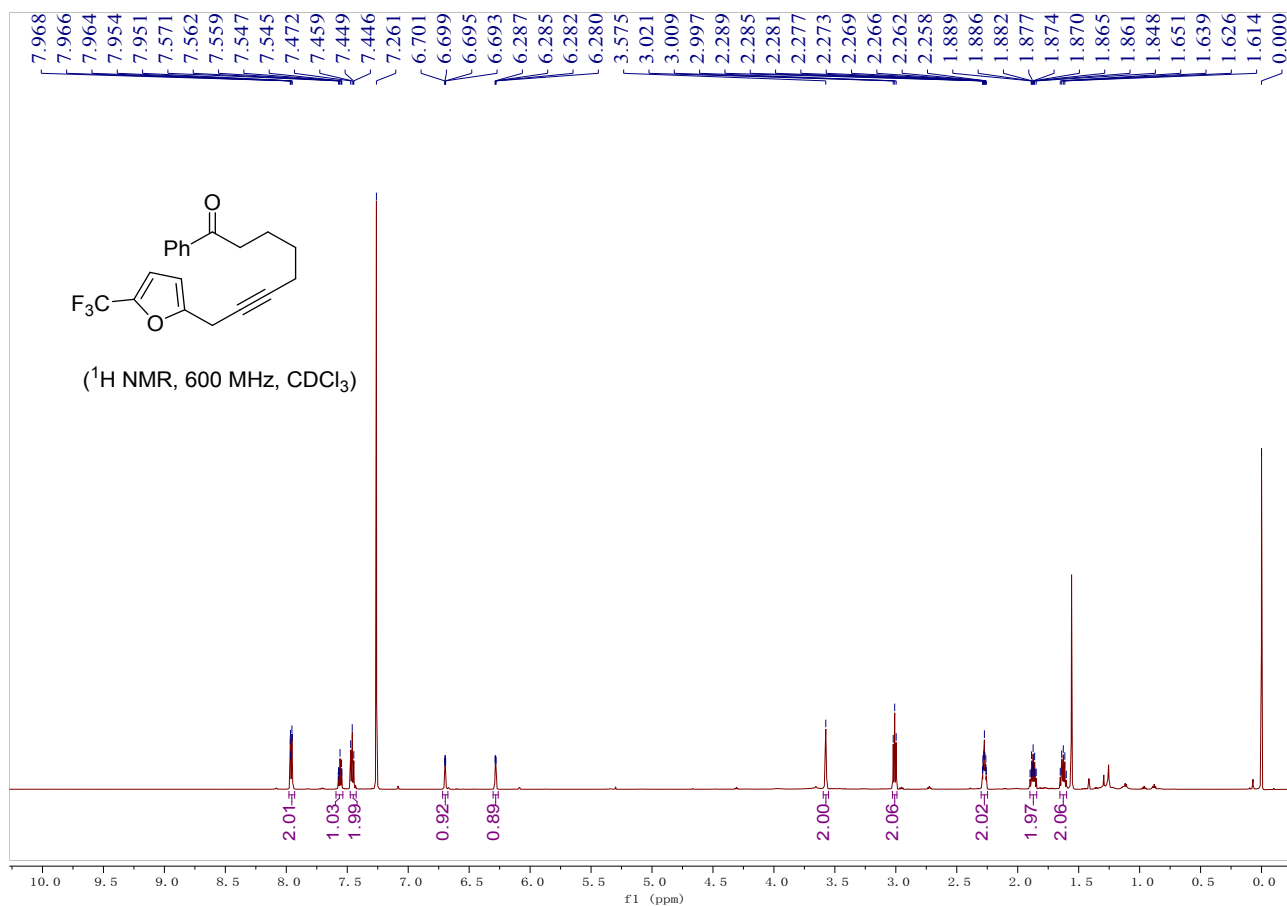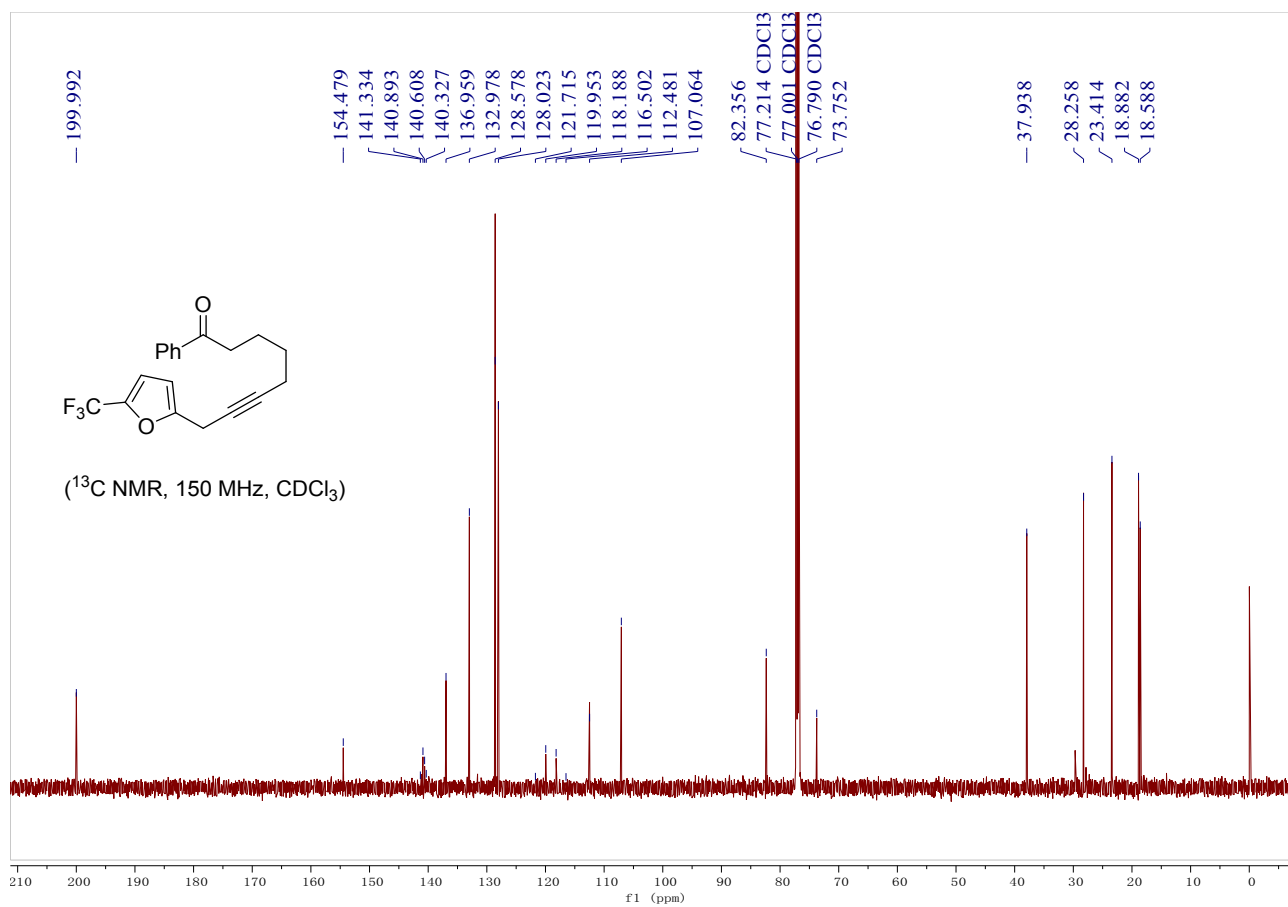



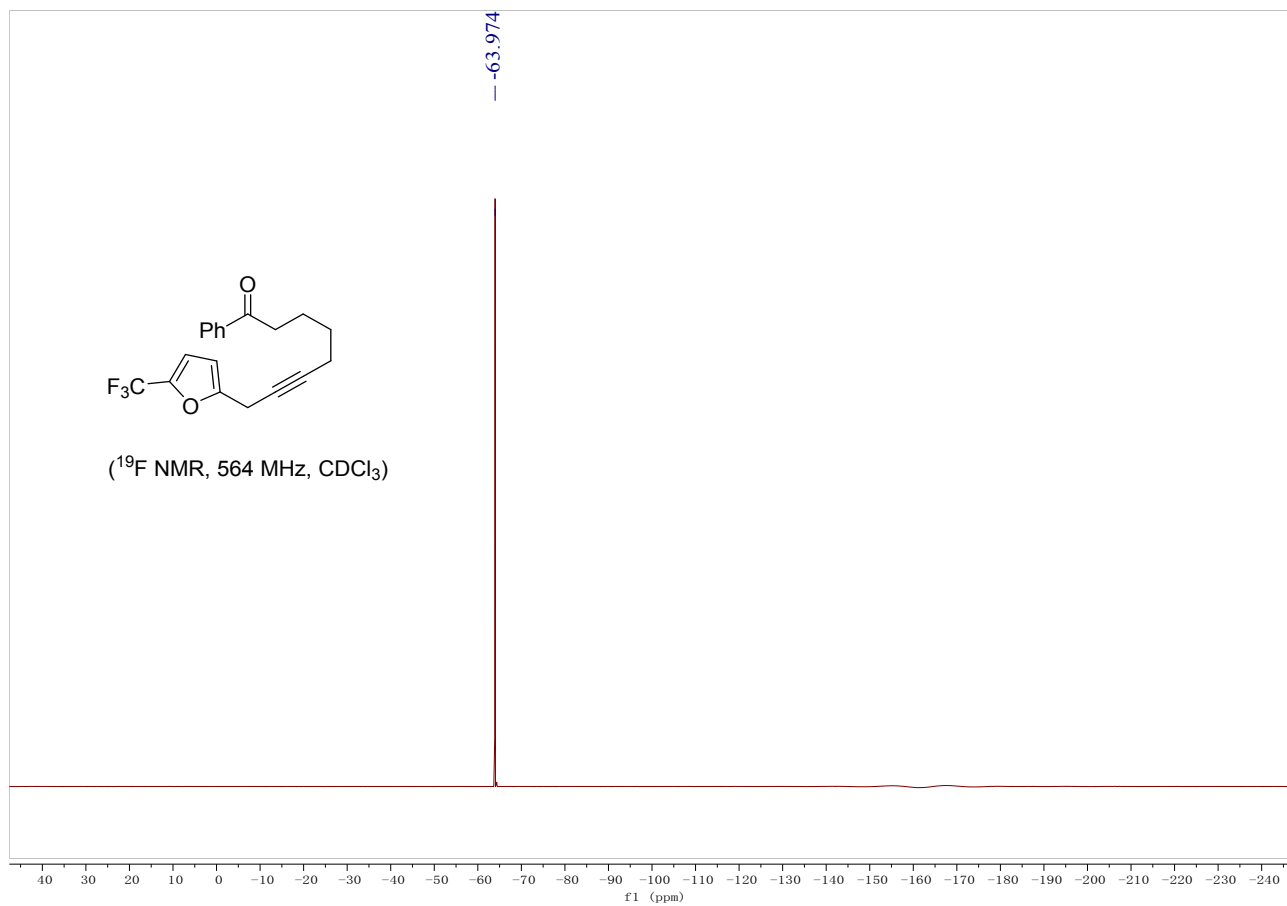

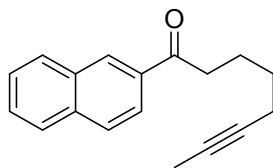

**1-(naphthalen-2-yl)oct-6-yn-1-one (3bb)**: colorless solid, m.p. 165-167 °C, 43 mg, 87%, Eluent: PE/EA = 20/1.

**<sup>1</sup>H NMR** (400 MHz, CDCl<sub>3</sub>, TMS): δ 8.48 (s, 1H), 8.04 (dd, *J* = 8.6, 1.6 Hz, 1H), 7.97 (d, *J* = 8.0 Hz, 1H), 7.92-7.86 (m, 2H), 7.64-7.53 (m, 2H), 3.13 (t, *J* = 7.4 Hz, 2H), 2.27-2.17 (m, 2H), 1.96-1.86 (m, 2H), 1.77 (t, *J* = 2.4 Hz, 3H), 1.67-1.60 (m, 2H). **<sup>13</sup>C NMR** (150 MHz, CDCl<sub>3</sub>, TMS): δ 3.5, 18.6, 23.7, 28.6, 38.1, 75.9, 78.8, 123.9, 126.7, 127.8, 128.36, 128.41, 129.5, 129.6, 132.5, 134.3, 135.5, 200.2. **IR** (EtOH): ν 2939, 2872, 2200, 1682, 1597, 1448, 1223, 1180, 851, 751, 732, 690 cm<sup>-1</sup>. **HRMS** (ESI) *m/z*: [M+Na]<sup>+</sup> Calcd. for C<sub>18</sub>H<sub>18</sub>ONa 273.1250; found 273.1258.

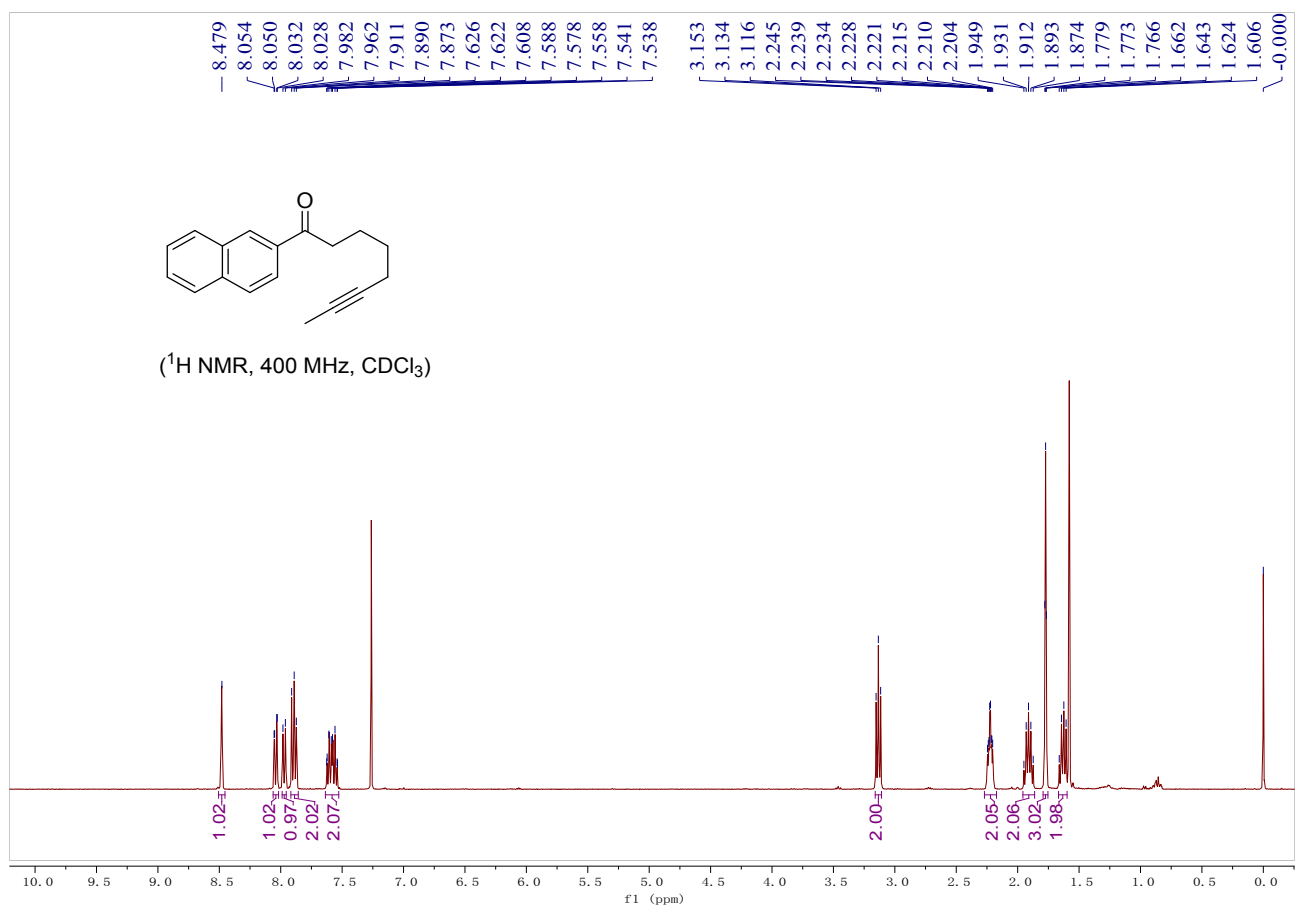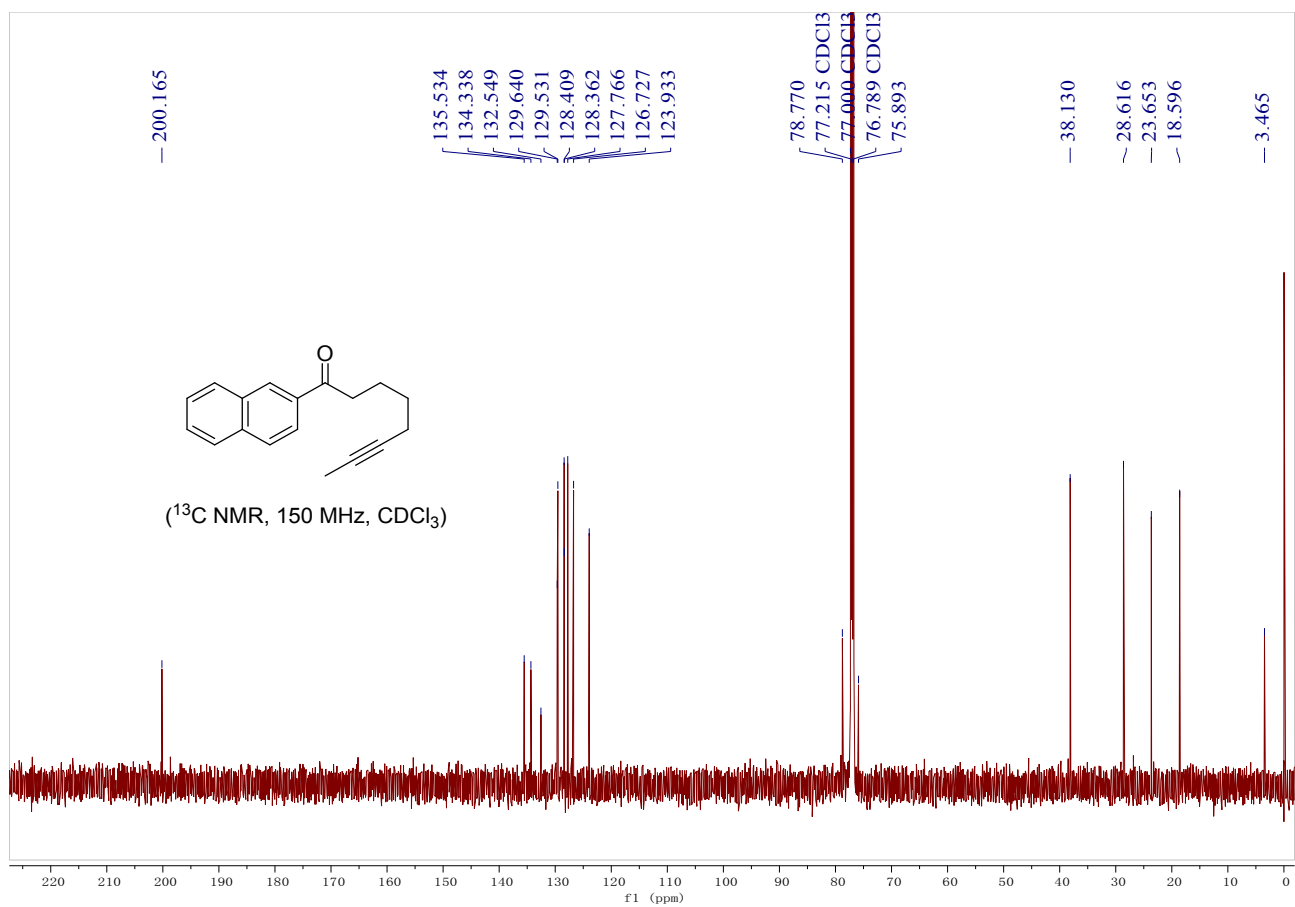

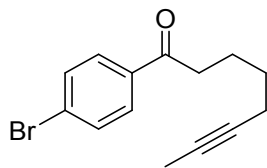

**1-(4-bromophenyl)oct-6-yn-1-one (3bc)** colorless oil, 51 mg, 92%, Eluent: PE/EA = 20/1.

**<sup>1</sup>H NMR** (400 MHz, CDCl<sub>3</sub>, TMS): δ 7.83 (d, *J* = 8.6 Hz, 2H), 7.60 (d, *J* = 8.6 Hz, 2H), 2.95 (t, *J* = 7.4 Hz, 2H), 2.24-2.14 (m, 2H), 1.87-1.80 (m, 2H), 1.77 (t, *J* = 2.6 Hz, 3H), 1.60-1.53 (m, 2H). **<sup>13</sup>C NMR** (100 MHz, CDCl<sub>3</sub>, TMS): δ 3.4, 18.5, 23.4, 28.5, 38.0, 75.9, 78.6, 128.1, 129.6, 131.9, 135.7, 199.1. **IR** (EtOH): ν 2973, 2883, 2219, 1653, 1534, 1379, 1086, 1045, 880, 801, 627 cm<sup>-1</sup>. **HRMS** (EI) *m/z*: [M]<sup>+</sup> Calcd. for C<sub>14</sub>H<sub>14</sub>OBr 277.0223; found 277.0212.

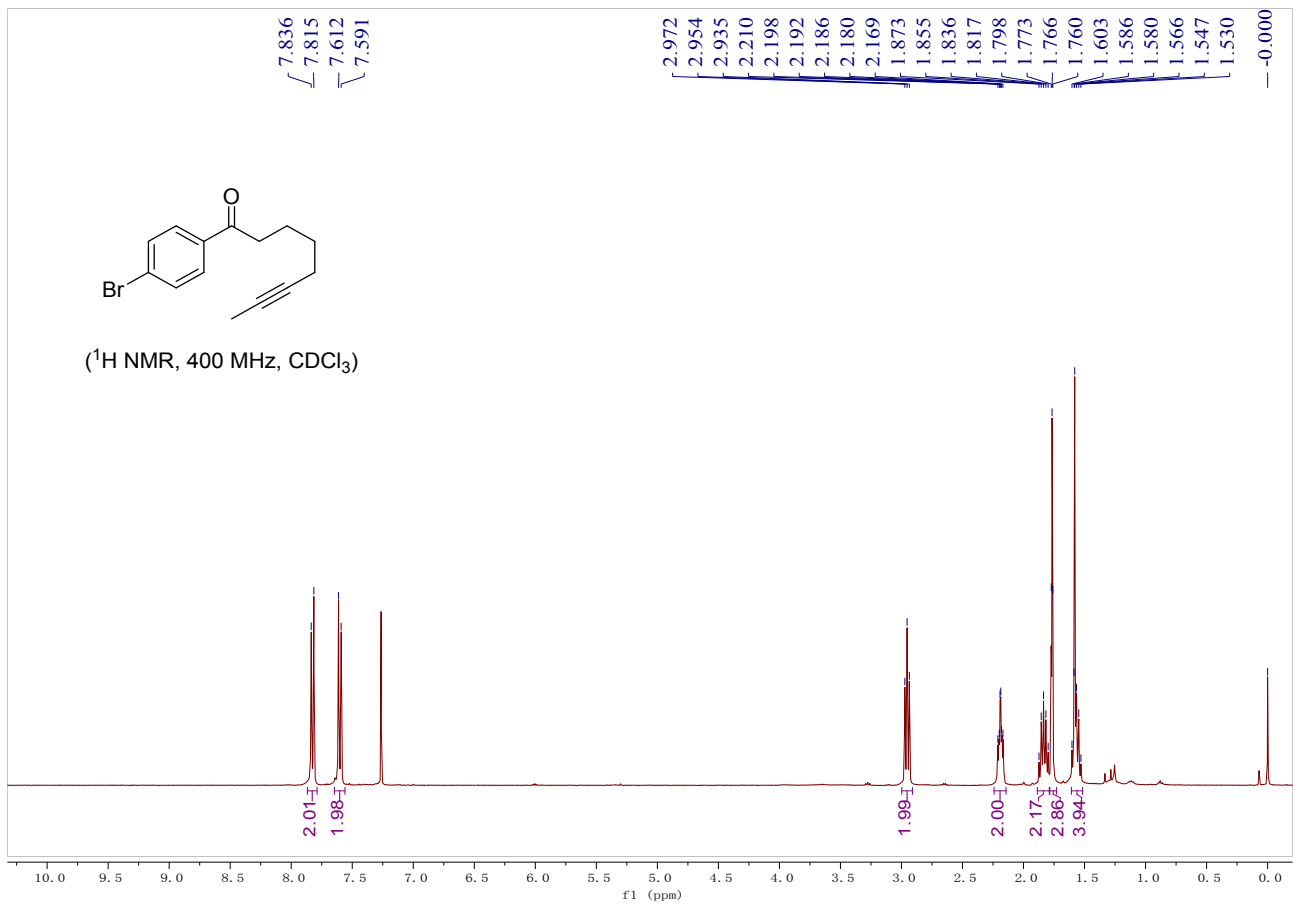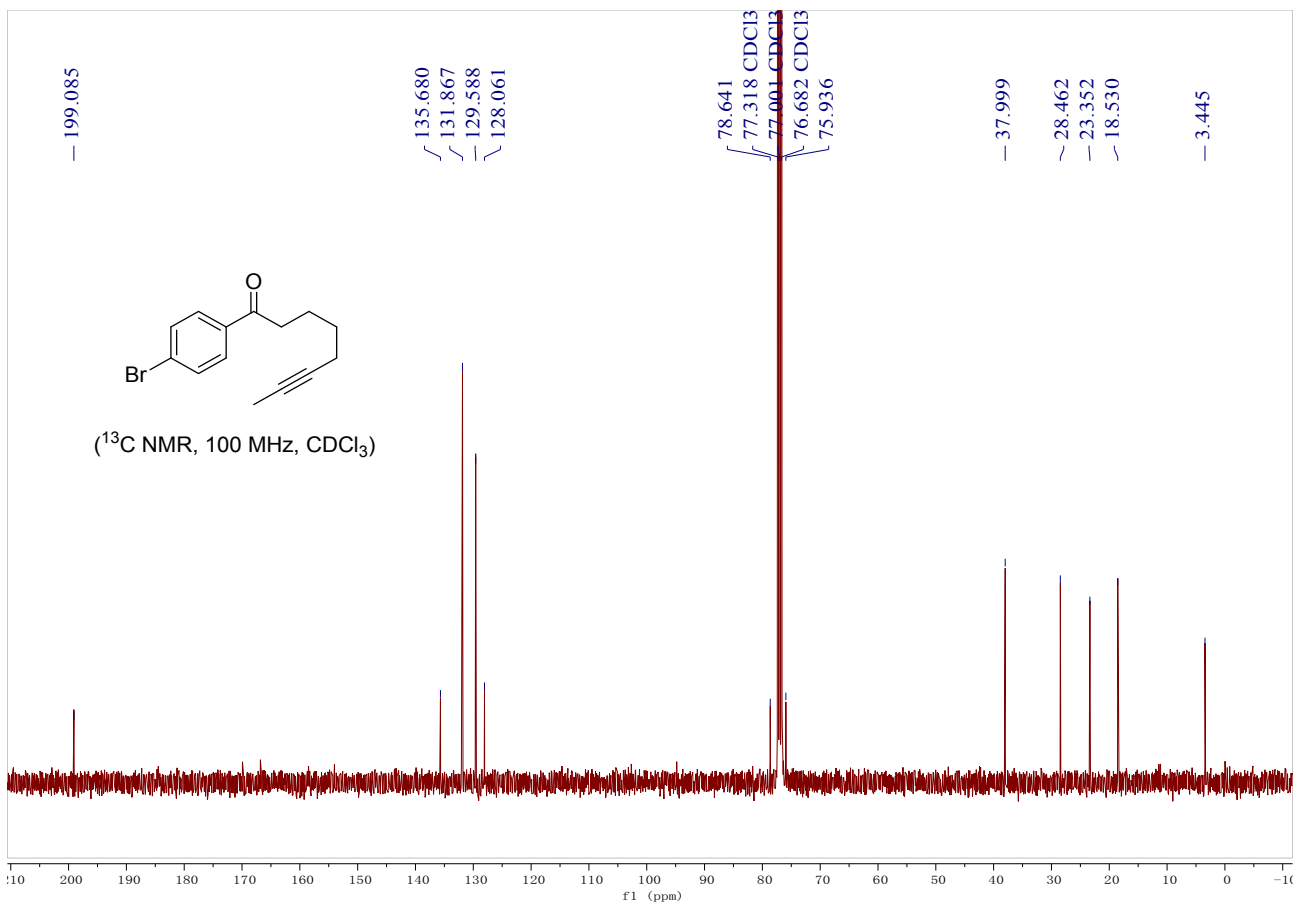

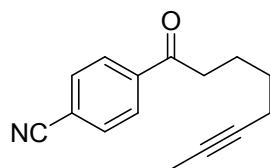

**4-(oct-6-ynoyl)benzonitrile (3bd)**: colorless oil, 36 mg, 79%, Eluent: PE/EA = 20/1.

**<sup>1</sup>H NMR** (600 MHz, CDCl<sub>3</sub>, TMS): δ 8.04 (d, *J* = 8.6 Hz, 2H), 7.77 (d, *J* = 8.6 Hz, 2H), 3.01 (t, *J* = 7.2 Hz, 2H), 2.20 (tq, *J* = 7.2, 2.6 Hz, 2H), 1.90-1.82 (m, 2H), 1.76 (t, *J* = 2.4 Hz, 3H), 1.60-1.55 (m, 2H). **<sup>13</sup>C NMR** (150 MHz, CDCl<sub>3</sub>, TMS): δ 3.4, 18.5, 23.1, 28.3, 38.3, 76.0, 78.5, 116.2, 118.0, 128.4, 132.5, 139.9, 198.6. **IR** (EtOH): ν 2974, 2921, 2893, 2211, 1645, 1380, 1327, 1086, 1044, 879, 737, 653 cm<sup>-1</sup>. **HRMS** (EI) *m/z*: [M]<sup>+</sup> Calcd. for C<sub>15</sub>H<sub>14</sub>ON 224.1070; found 224.1061.

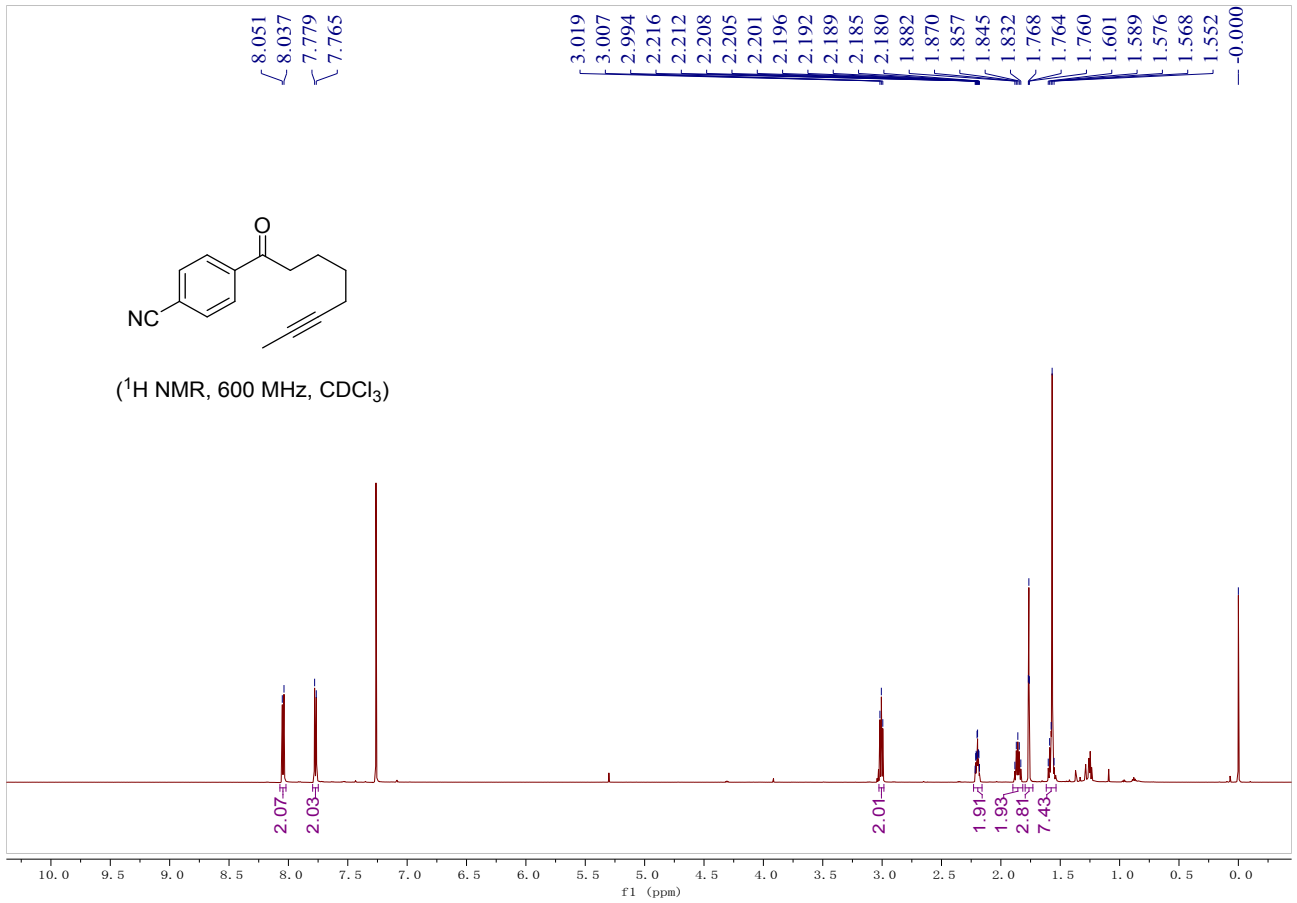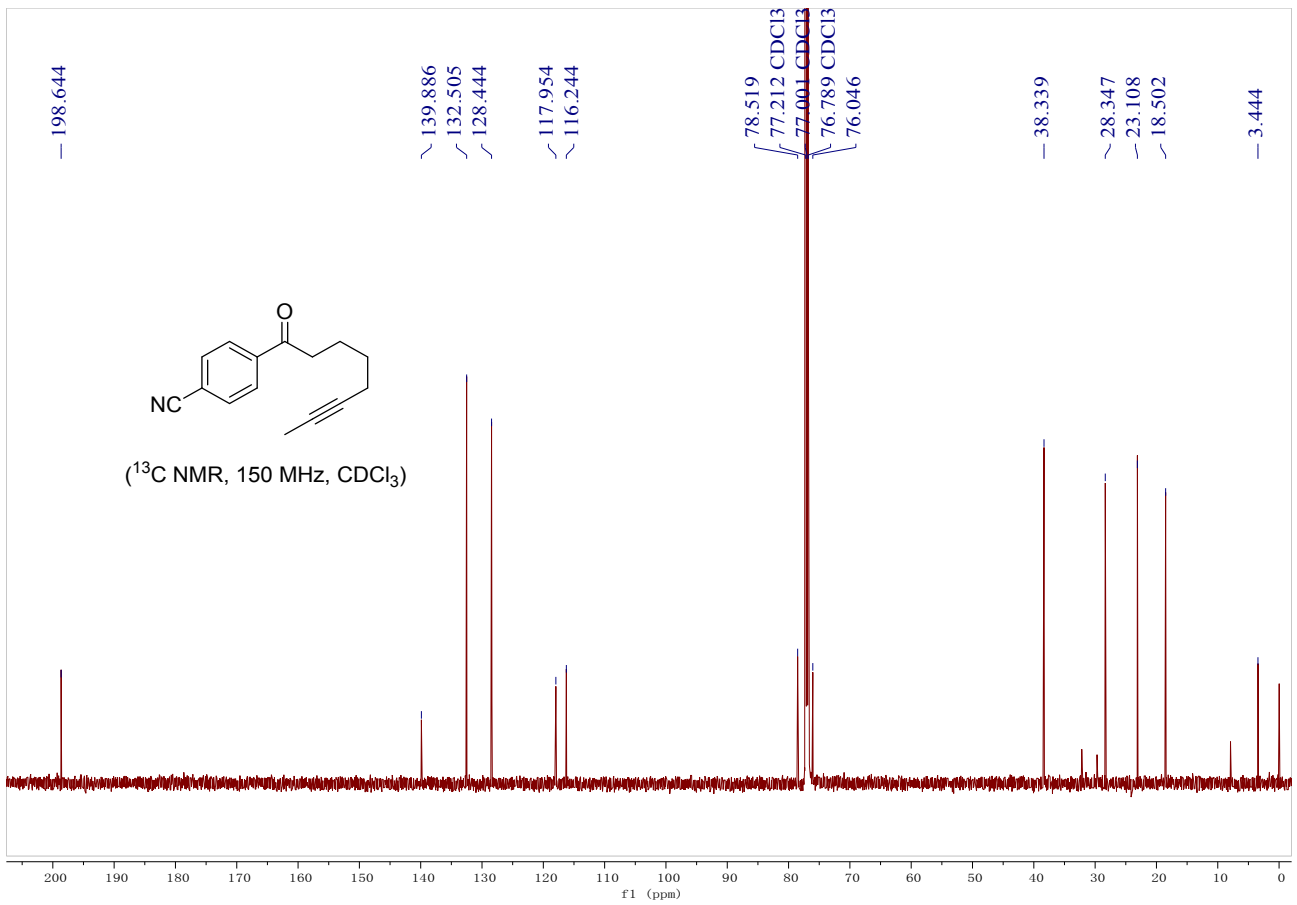

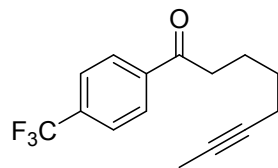

**1-(4-(trifluoromethyl)phenyl)oct-6-yn-1-one (3be)**: colorless oil, 40 mg, 75%, Eluent: PE/EA = 20/1.

**<sup>1</sup>H NMR** (400 MHz, CDCl<sub>3</sub>, TMS): δ 8.06 (d, *J* = 8.0 Hz, 2H), 7.73 (d, *J* = 8.0 Hz, 2H), 3.02 (t, *J* = 7.2 Hz, 2H), 2.20 (tq, *J* = 7.2, 2.6 Hz, 2H), 1.91-1.82 (m, 2H), 1.77 (t, *J* = 2.6 Hz, 3H), 1.62-1.57 (m, 2H). **<sup>13</sup>C NMR** (150 MHz, CDCl<sub>3</sub>, TMS): δ 3.4, 18.5, 23.2, 28.4, 38.3, 76.0, 78.6, 123.6 (q, *J* = 225.3 Hz), 125.7 (q, *J* = 3.4 Hz), 128.4, 134.3 (q, *J* = 26.5 Hz), 139.6, 199.1. **<sup>19</sup>F NMR** (376 MHz, CDCl<sub>3</sub>): δ -63.1; **IR** (EtOH): ν 2940, 2910, 2882, 2115, 1672, 1576, 1448, 1367, 1020, 1009, 971, 738, 663 cm<sup>-1</sup>. **HRMS** (EI) *m/z*: [M]<sup>+</sup> Calcd. for C<sub>15</sub>H<sub>15</sub>OF<sub>3</sub> 268.1075; found 268.1070.



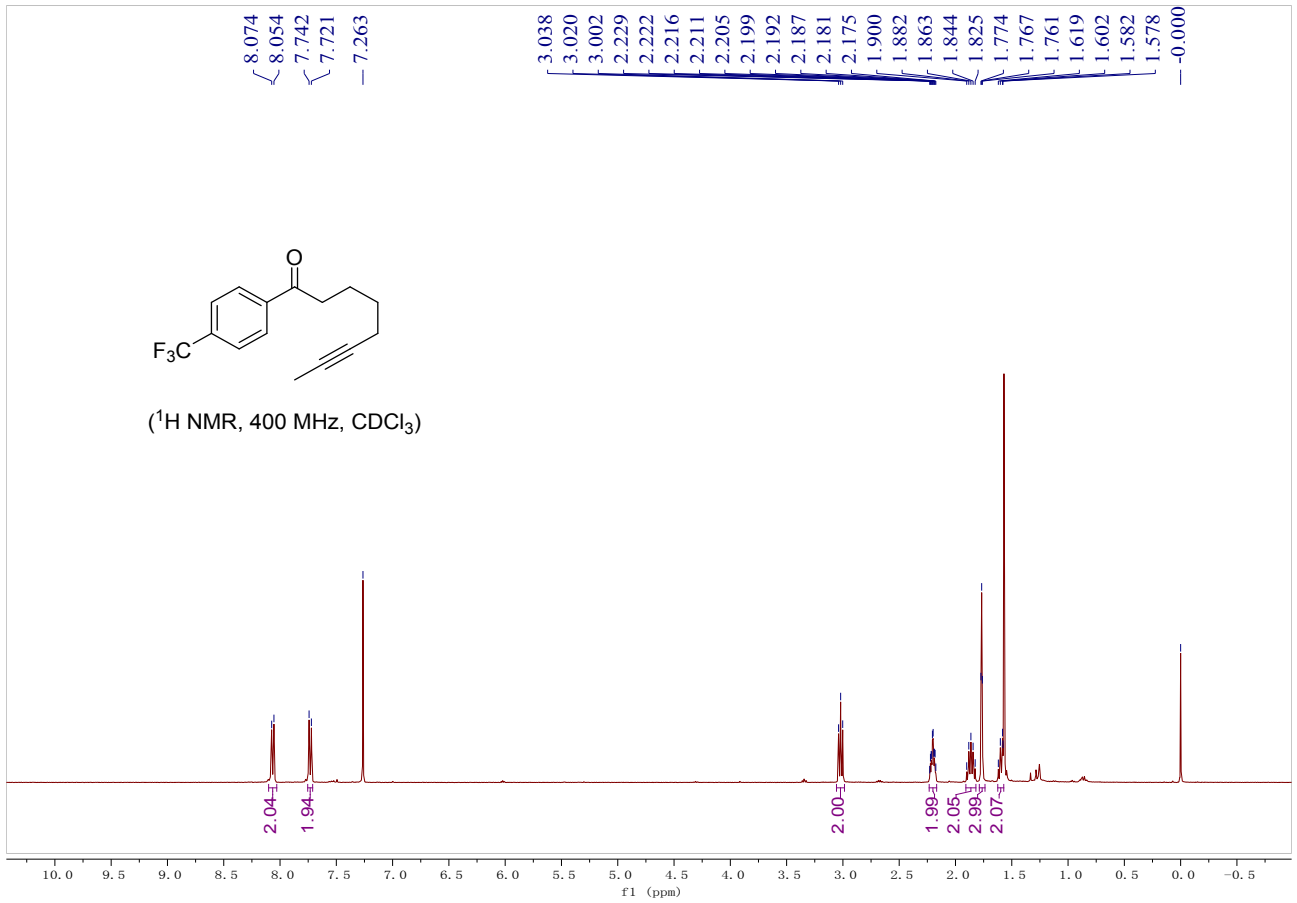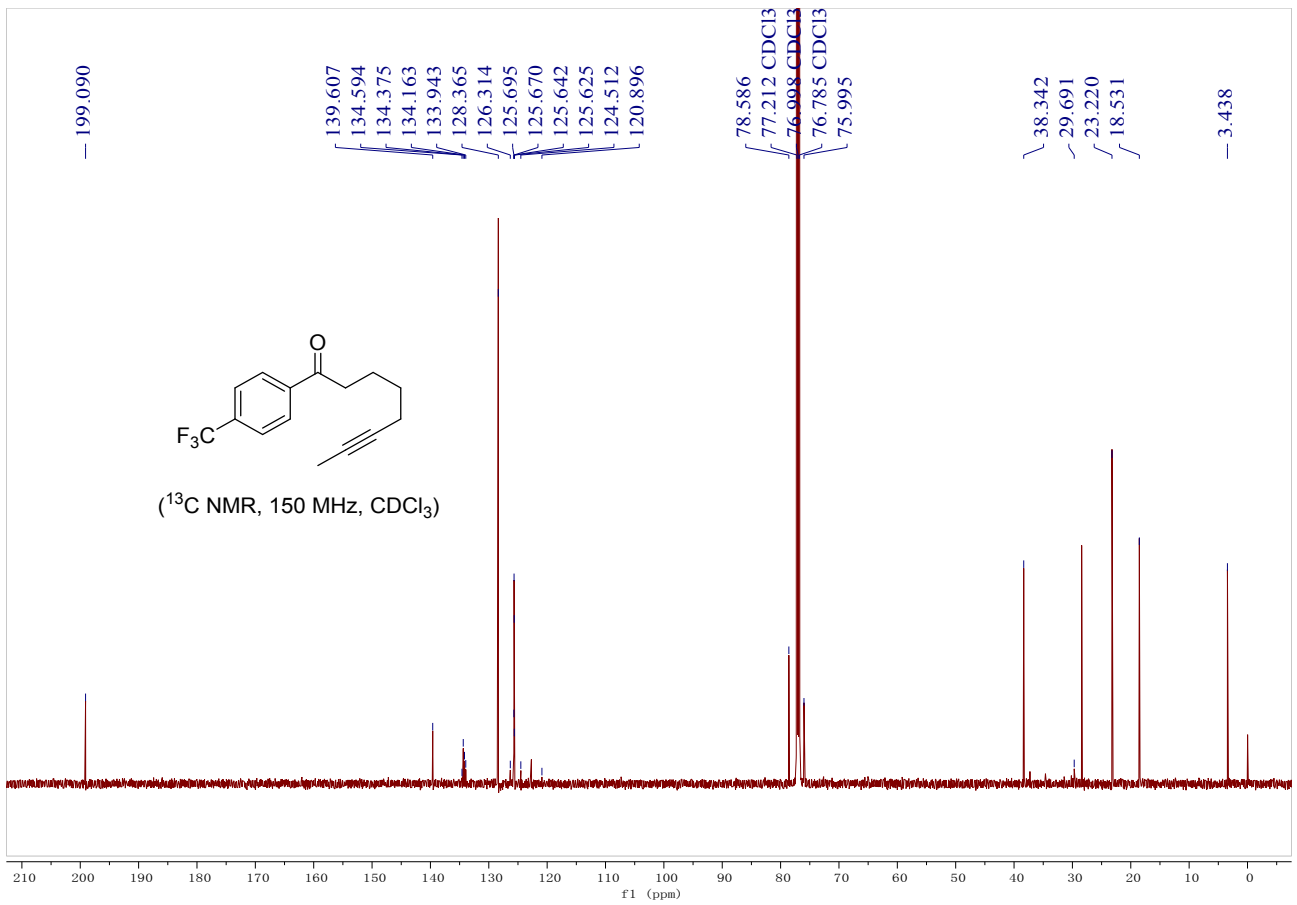

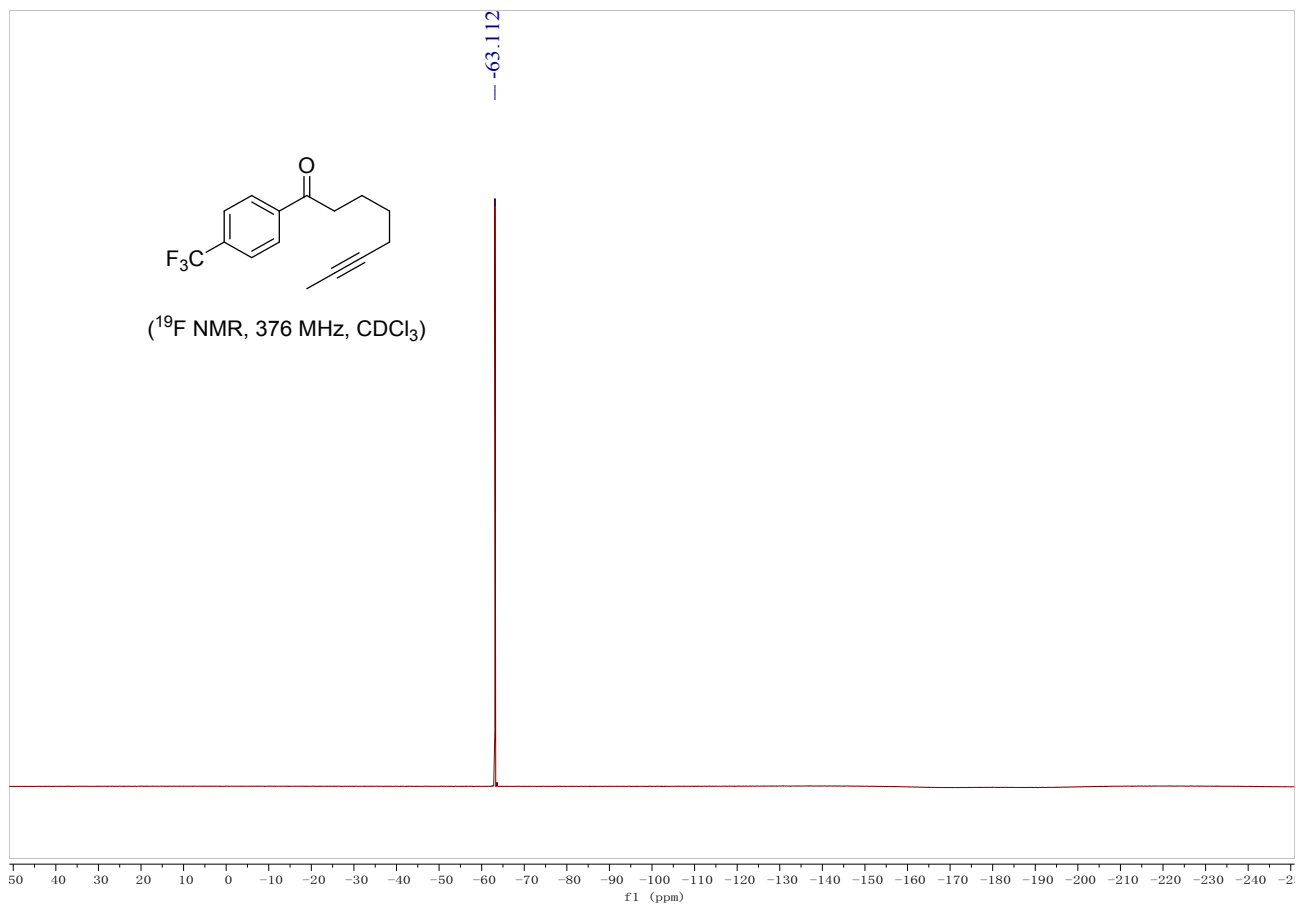

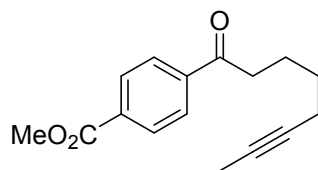

**Methyl 4-(oct-6-ynoyl)benzoate (3bf):** colorless oil, 44 mg, 84%, Eluent: PE/EA = 20/1.

**<sup>1</sup>H NMR** (400 MHz, CDCl<sub>3</sub>, TMS): δ 8.12 (d, *J* = 8.4 Hz, 2H), 8.01 (d, *J* = 8.4 Hz, 2H), 3.95 (s, 3H), 3.02 (t, *J* = 7.4 Hz, 2H), 2.20 (tq, *J* = 7.2, 2.6 Hz, 2H), 1.90-1.83 (m, 2H), 1.77 (t, *J* = 2.4 Hz, 3H), 1.64-1.52 (m, 2H). **<sup>13</sup>C NMR** (100 MHz, CDCl<sub>3</sub>, TMS): δ 3.5, 18.5, 23.3, 28.4, 38.4, 52.5, 76.0, 78.6, 127.9, 129.8, 133.7, 140.2, 166.3, 199.6. **IR** (EtOH): ν 2978, 2945, 2218, 1671, 1607, 1507, 1357, 1269, 1229, 1087, 995, 855, 724, 652 cm<sup>-1</sup>. **HRMS** (ESI) *m/z*: [M+Na]<sup>+</sup> Calcd. for C<sub>16</sub>H<sub>18</sub>O<sub>3</sub>Na 281.1148; found 281.1153.

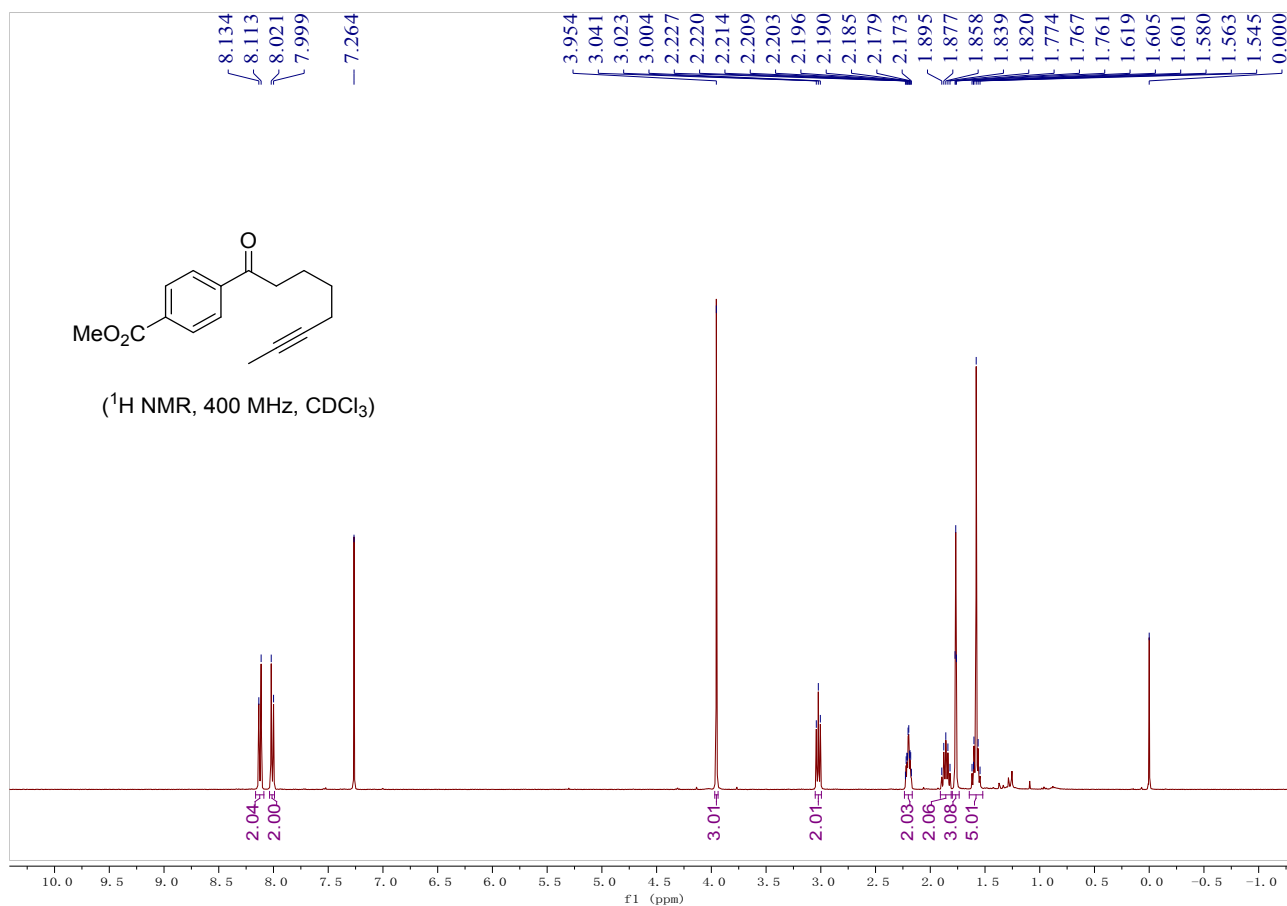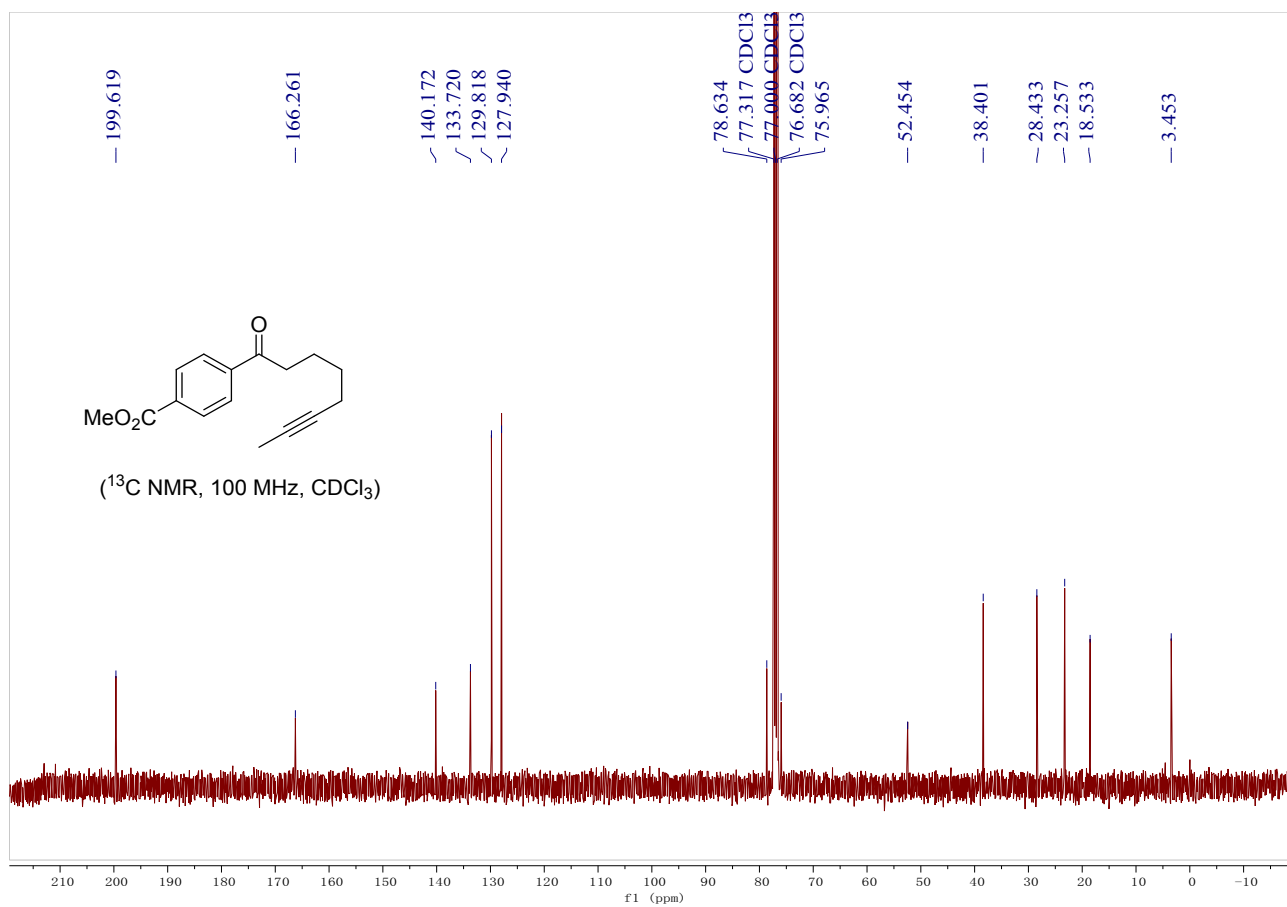

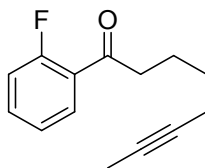

**1-(2-fluorophenyl)oct-6-yn-1-one (3bg)**: colorless oil, 34 mg, 79%, Eluent: PE/EA = 20/1.

**<sup>1</sup>H NMR** (600 MHz, CDCl<sub>3</sub>, TMS): δ 7.85 (td, *J* = 7.6, 2.0 Hz, 1H), 7.54-7.47 (m, 1H), 7.25-7.19 (m, 1H), 7.15-7.09 (m, 1H), 3.02-2.98 (m, 2H), 2.18 (tq, *J* = 7.2, 2.6 Hz, 2H), 1.85-1.79 (m, 2H), 1.76 (t, *J* = 2.4 Hz, 3H), 1.59-1.53 (m, 2H). **<sup>13</sup>C NMR** (150 MHz, CDCl<sub>3</sub>, TMS): δ 3.4, 18.6, 23.2, 28.5, 43.1, 75.8, 78.8, 116.6 (d, *J* = 23.6 Hz), 124.4 (d, *J* = 3.9 Hz), 125.9 (d, *J* = 13.7 Hz), 130.6, 134.3 (d, *J* = 9.6 Hz), 162.4 (d, *J* = 253.5 Hz), 198.6. **<sup>19</sup>F NMR** (564 MHz, CDCl<sub>3</sub>): δ -109.6; **IR** (EtOH): ν 2939, 2866, 2214, 1682, 1597, 1458, 1213, 1002, 808, 752, 732, 690 cm<sup>-1</sup>. **HRMS** (ESI) *m/z*: [M+Na]<sup>+</sup> Calcd. for C<sub>14</sub>H<sub>15</sub>OFNa 241.0999; found 241.1006.

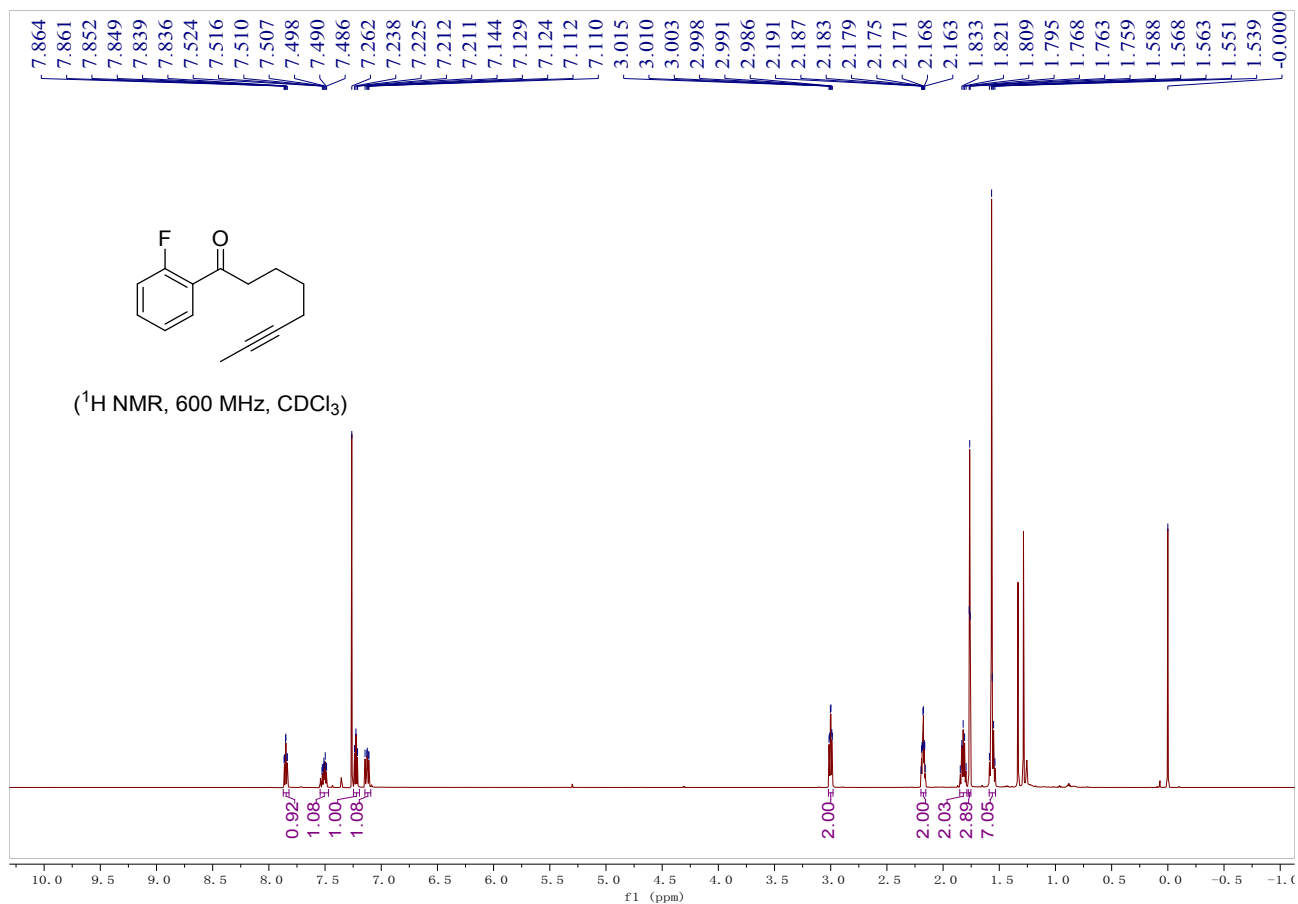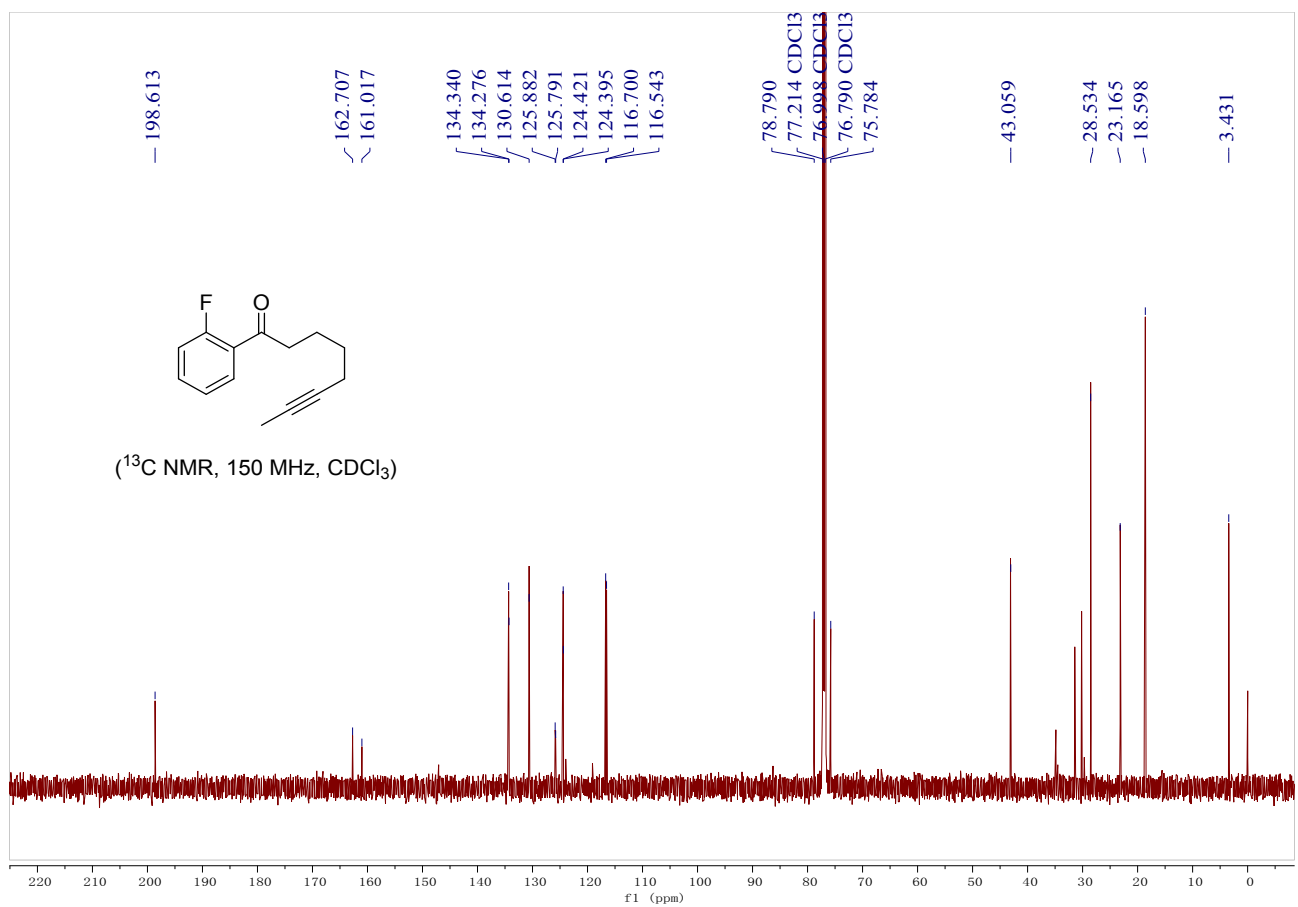

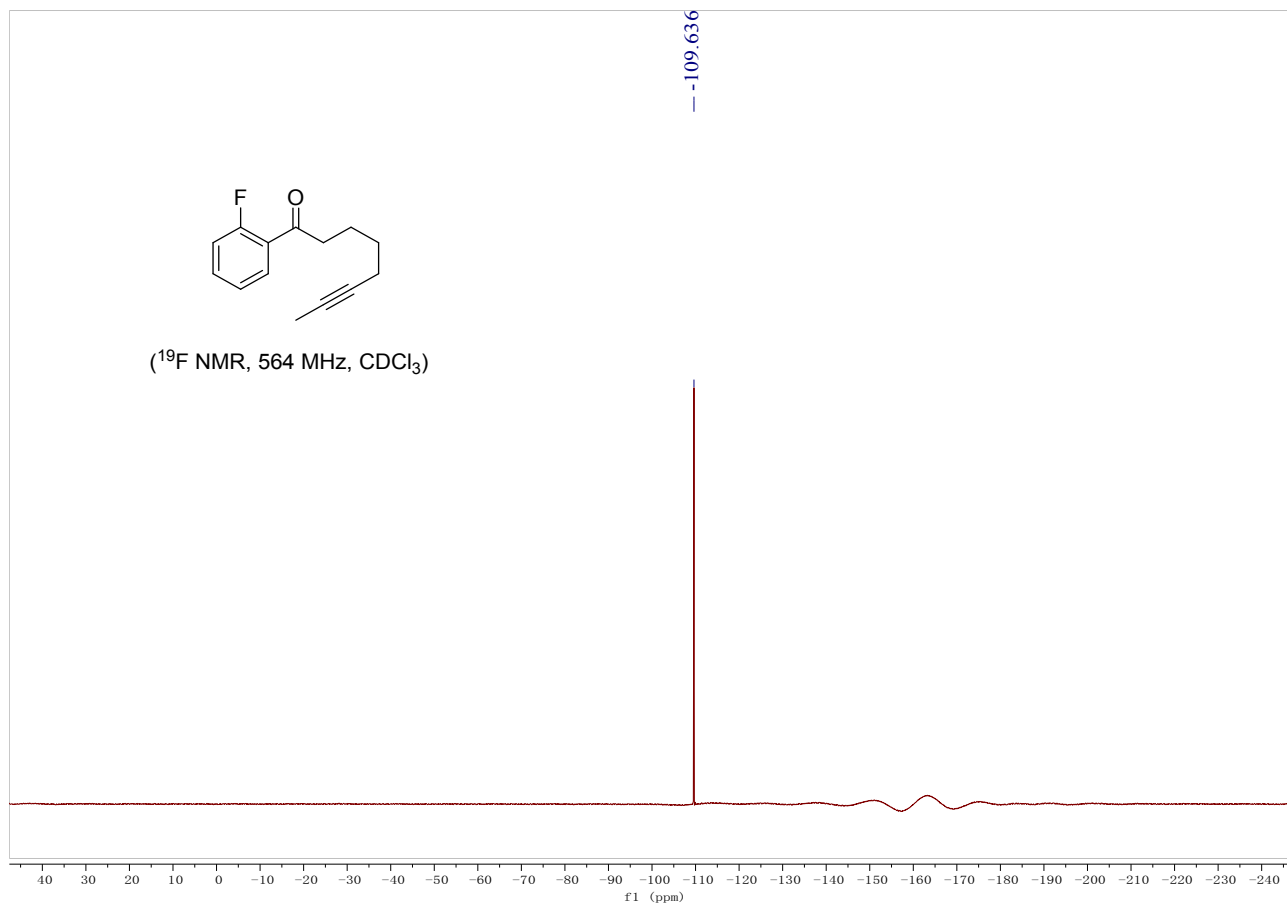

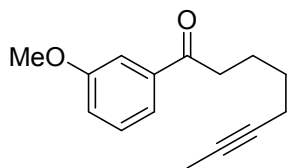

**1-(3-methoxyphenyl)oct-6-yn-1-one (3bh):** colorless oil, 42 mg, 92%, Eluent: PE/EA = 20/1.

**<sup>1</sup>H NMR** (400 MHz, CDCl<sub>3</sub>, TMS): δ 7.54 (d, *J* = 7.8 Hz, 1H), 7.51-7.46 (m, 1H), 7.36 (t, *J* = 7.8 Hz, 1H), 7.10 (ddd, *J* = 8.2, 2.8, 1.0 Hz, 1H), 3.85 (s, 3H), 2.97 (t, *J* = 7.4 Hz, 2H), 2.19 (tq, *J* = 7.2, 2.6 Hz, 2H), 1.88-1.80 (m, 2H), 1.77 (t, *J* = 2.6 Hz, 3H), 1.61-1.53 (m, 2H). **<sup>13</sup>C NMR** (100 MHz, CDCl<sub>3</sub>, TMS): δ 3.4, 18.5, 23.5, 28.5, 38.1, 55.3, 75.8, 78.7, 112.3, 119.3, 120.6, 129.5, 138.3, 159.8, 199.9. **IR** (EtOH): ν 2941, 2925, 2199, 1681, 1600, 1450, 1221, 1194, 1080, 1002, 841, 776, 737, 682 cm<sup>-1</sup>. **HRMS** (DART) *m/z*: [M+H]<sup>+</sup> Calcd. for C<sub>15</sub>H<sub>19</sub>O<sub>2</sub> 231.1380; found 231.1378.



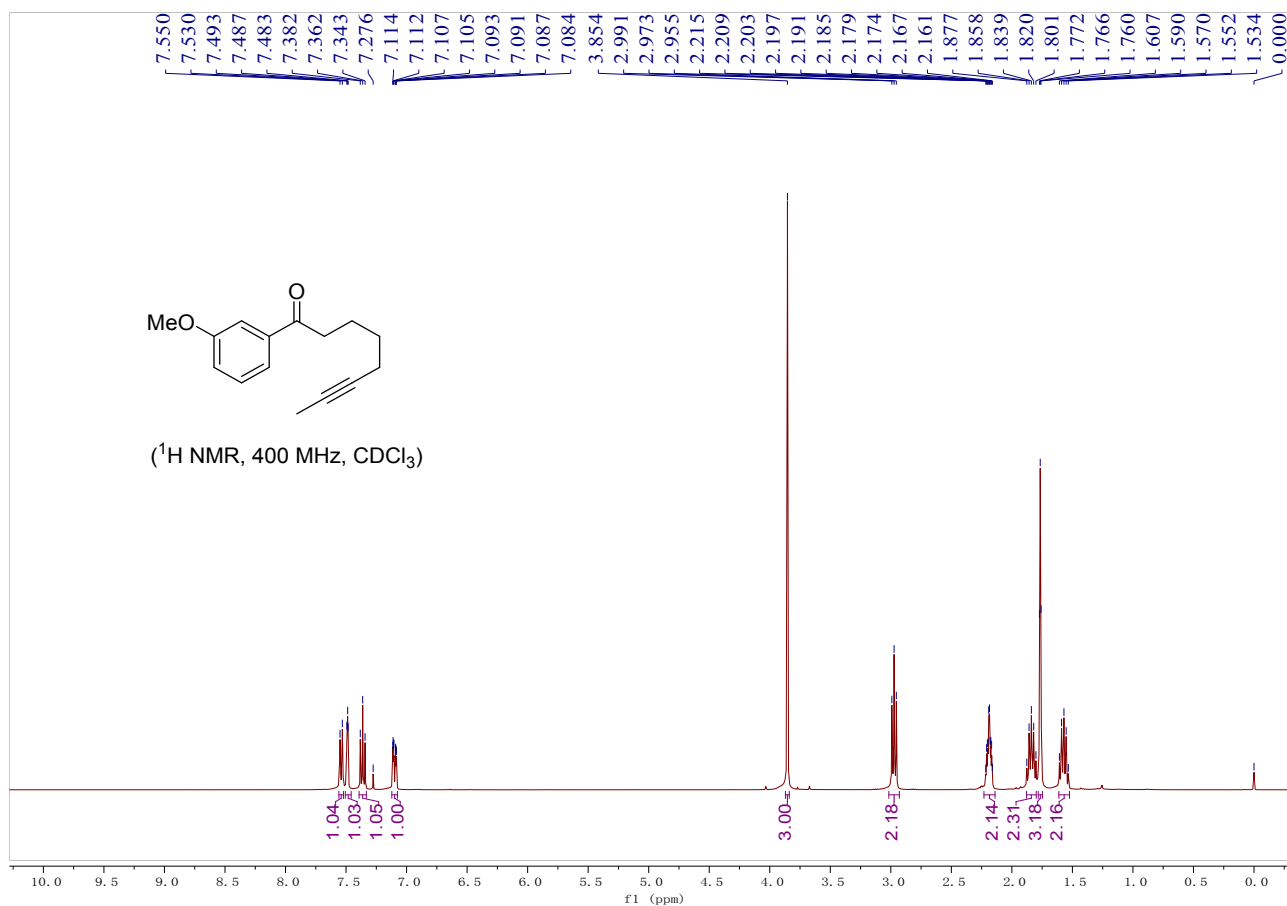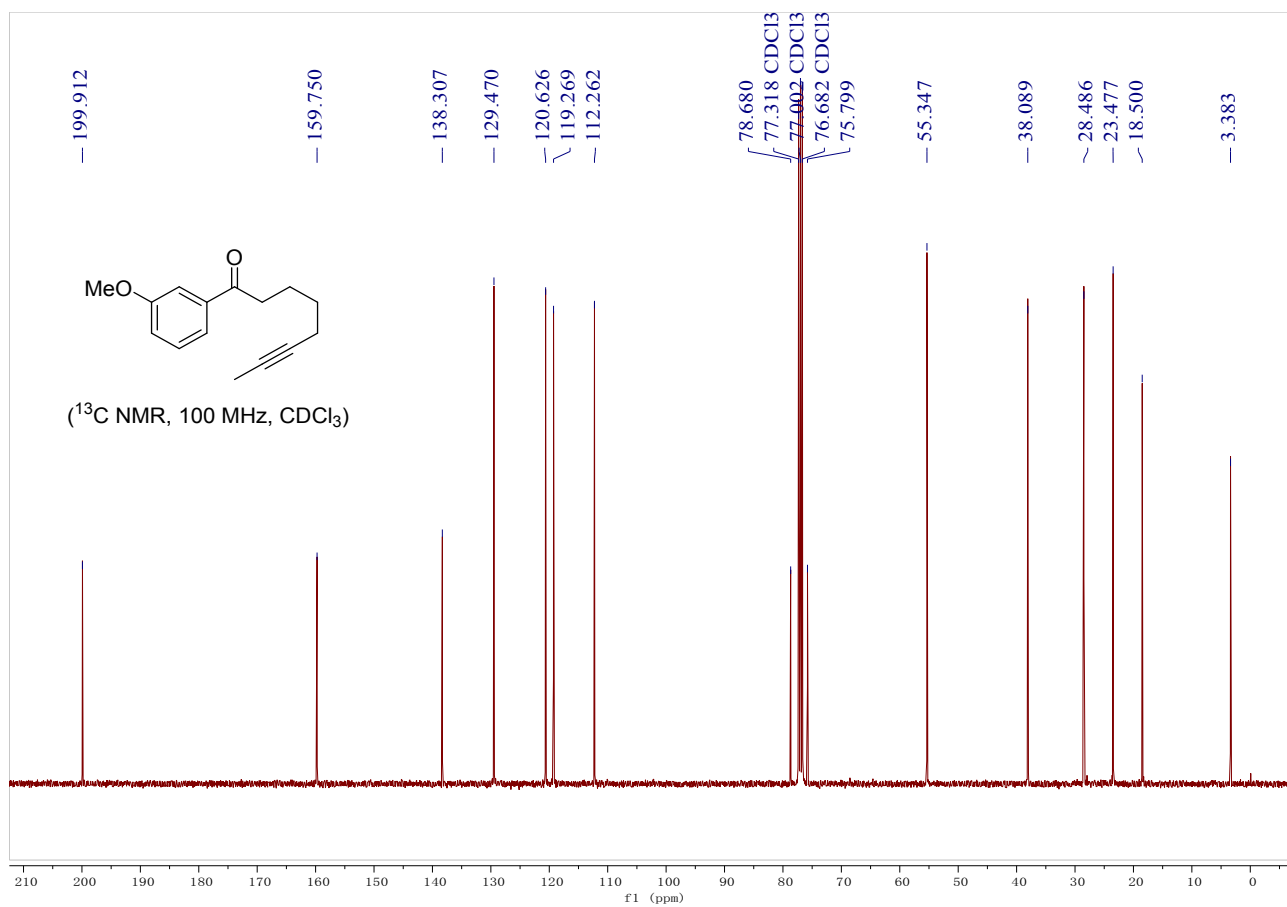

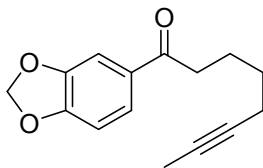

**1-phenyloct-6-yn-1-one (3bi)**: colorless oil, 40 mg, 81%, Eluent: PE/EA = 20/1.

**<sup>1</sup>H NMR** (400 MHz, CDCl<sub>3</sub>, TMS): δ 7.57 (dd, *J* = 8.2, 1.8 Hz, 1H), 7.44 (d, *J* = 1.8 Hz, 1H), 6.85 (d, *J* = 8.2 Hz, 1H), 6.04 (s, 2H), 2.91 (t, *J* = 7.2 Hz, 2H), 2.19 (tq, *J* = 7.2, 2.6 Hz, 2H), 1.86-1.75 (m, 5H), 1.59-1.51 (m, 2H). **<sup>13</sup>C NMR** (100 MHz, CDCl<sub>3</sub>, TMS): δ 3.4, 18.5, 23.7, 28.6, 37.8, 75.9, 78.7, 101.8, 107.8, 107.9, 124.2, 131.9, 148.1, 151.6, 198.3. **IR** (EtOH): ν 2936, 2920, 2199, 2866, 1682, 1599, 1278, 1257, 1223, 1194, 1180, 1000, 789, 752, 700, 663 cm<sup>-1</sup>. **HRMS** (ESI) *m/z*: [M+Na]<sup>+</sup> Calcd. for C<sub>15</sub>H<sub>16</sub>O<sub>3</sub>Na 267.0992; found 267.0998.

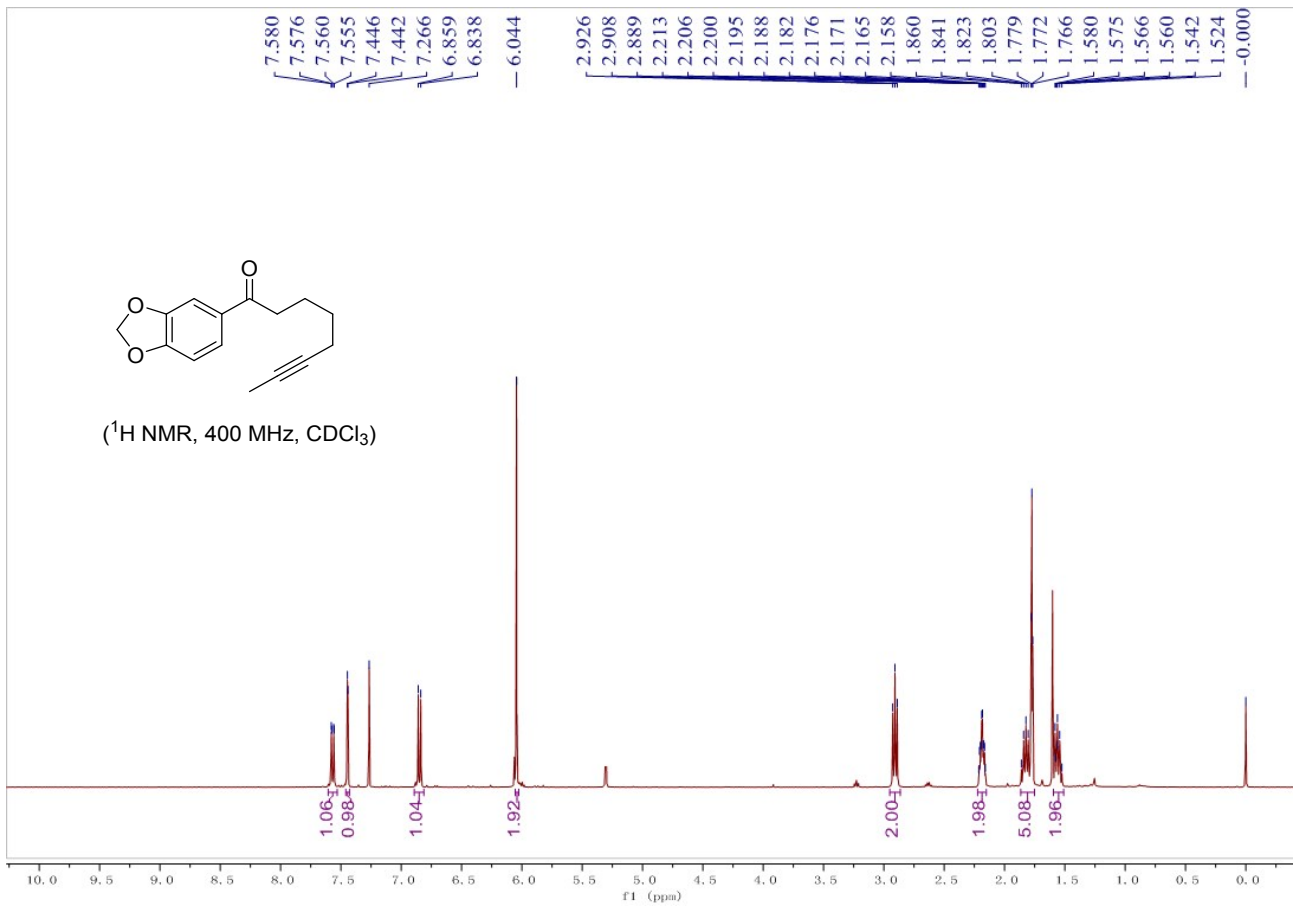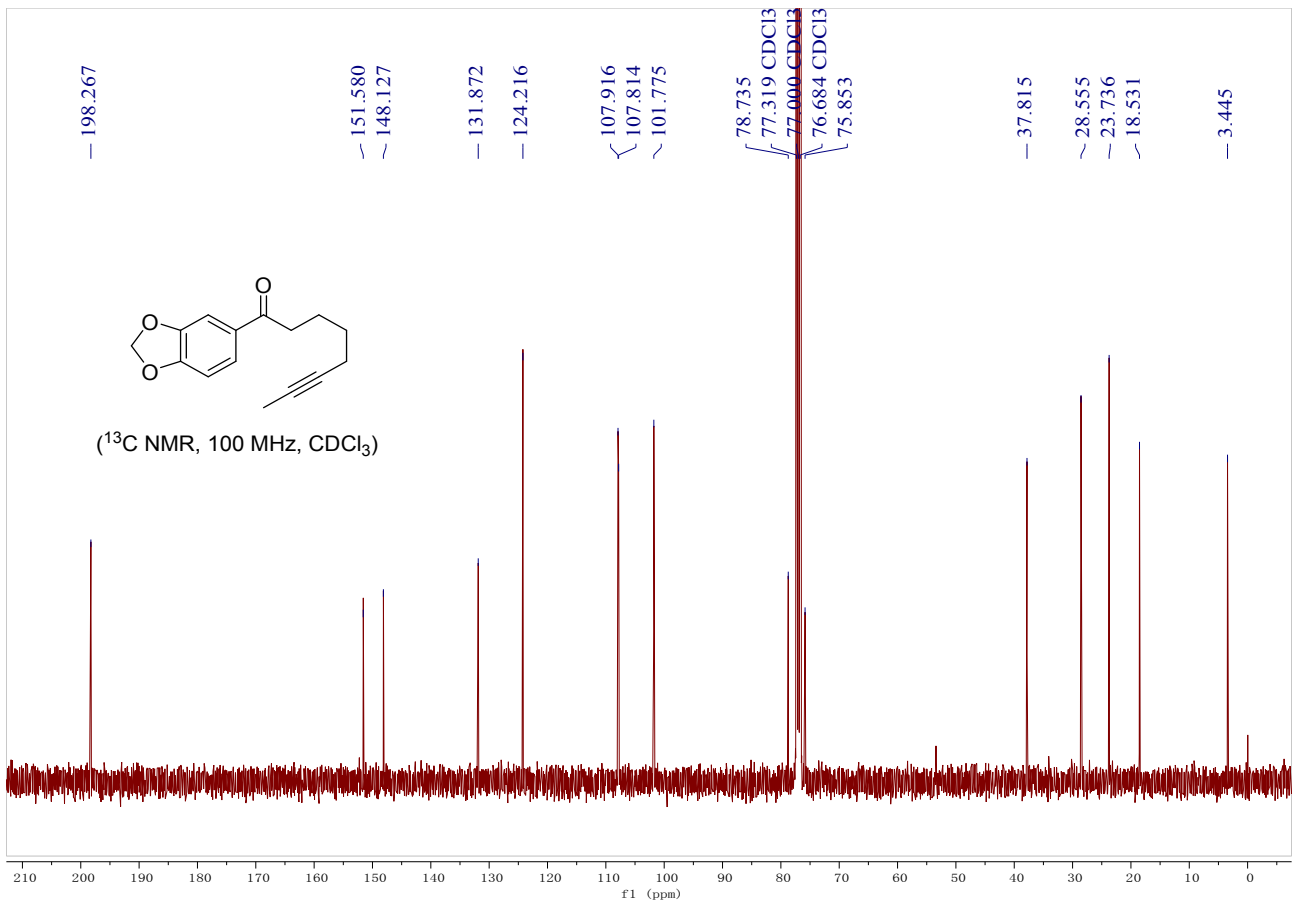

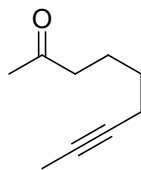

**Non-7-yn-2-one (3bj):** colorless oil, 12 mg, 43%, Eluent: PE/EA = 20/1.

**<sup>1</sup>H NMR** (400 MHz, CDCl<sub>3</sub>, TMS): δ 2.38 (t, *J* = 7.4 Hz, 2H), 2.13-2.01 (m, 5H), 1.71 (s, 3H), 1.65-1.55 (m, 2H), 1.47-1.34 (m, 2H). **<sup>13</sup>C NMR** (150MHz, CDCl<sub>3</sub>, TMS): δ 3.3, 18.4, 22.9, 28.3, 29.7, 43.1, 75.7, 78.6, 208.8. **IR** (EtOH): ν 2973, 2881, 2872, 2209, 1710, 1399, 1380, 1087, 1045, 880 cm<sup>-1</sup>. **HRMS** (DART) *m/z*: [M+H]<sup>+</sup> Calcd. for C<sub>9</sub>H<sub>15</sub>O 139.1117; found 139.1119.

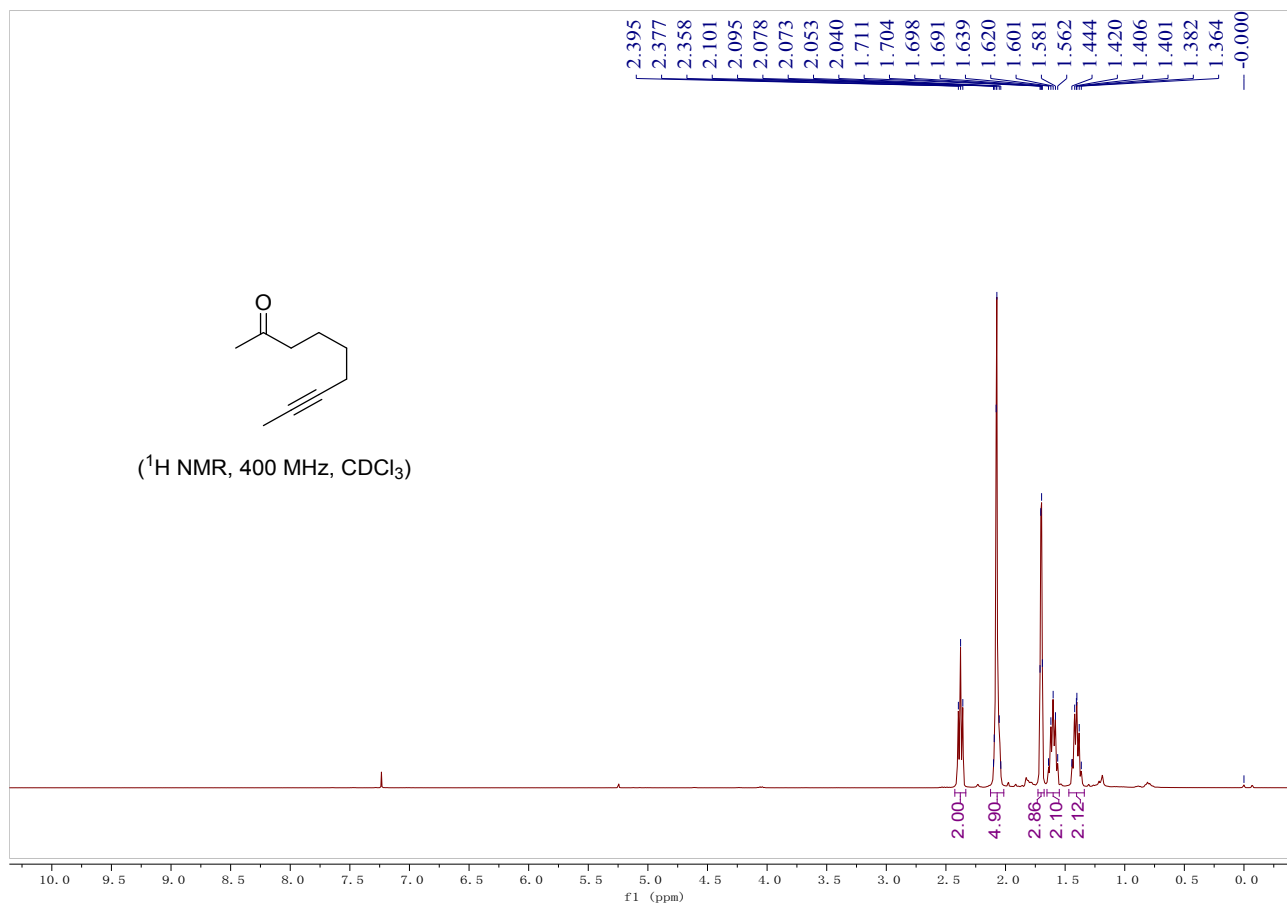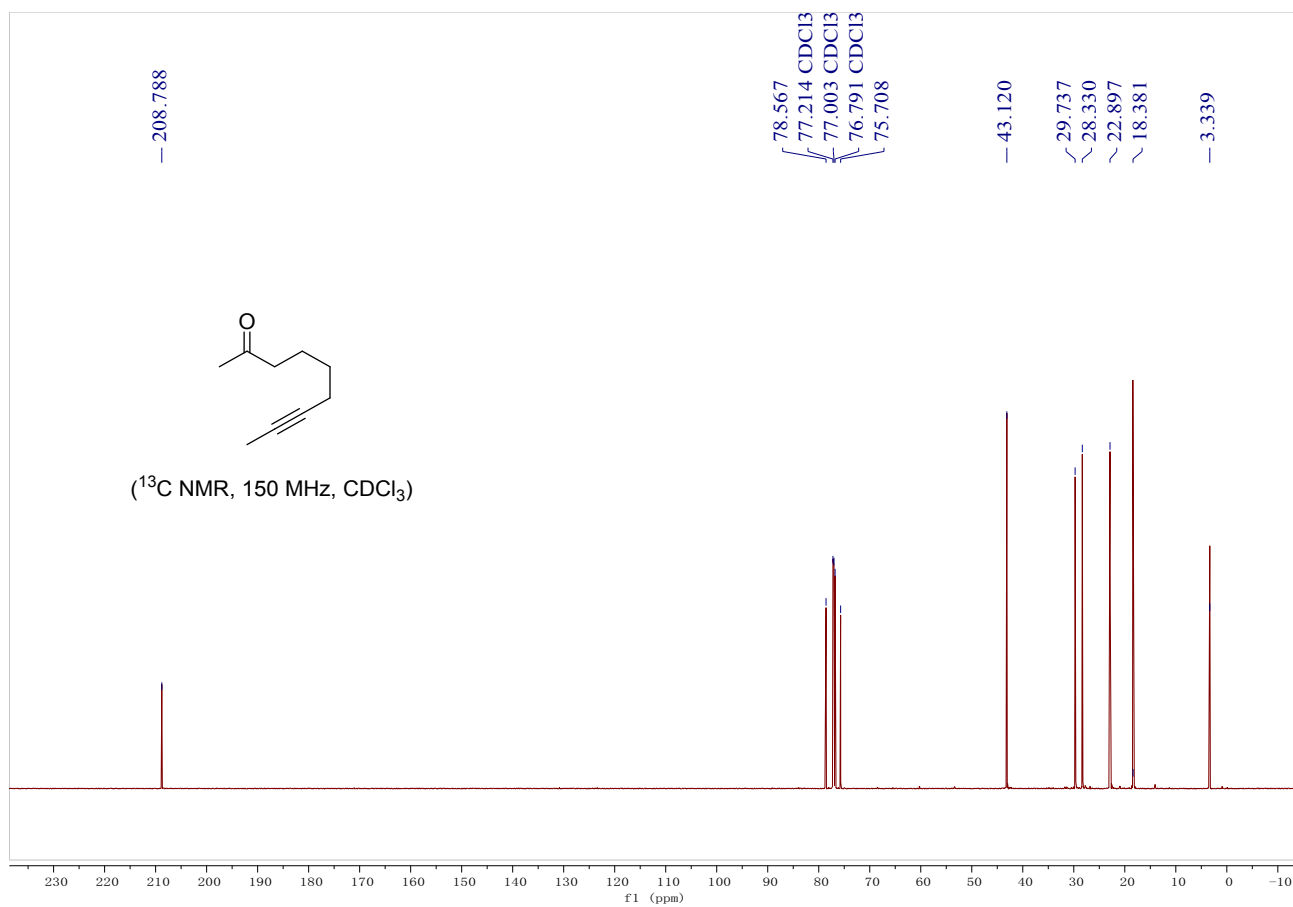

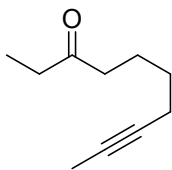

**Dec-8-yn-3-one (3bk):** colorless oil, 12 mg, 40%, Eluent: PE/EA = 20/1.

**<sup>1</sup>H NMR** (600 MHz, CDCl<sub>3</sub>, TMS): δ 2.42-2.36 (m, 4H), 2.10 (tq, *J* = 7.2, 2.6 Hz, 2H), 1.73 (t, *J* = 2.6 Hz, 3H), 1.65-1.60 (m, 2H), 1.47-1.39 (m, 2H), 1.01 (t, *J* = 7.2 Hz, 3H). **<sup>13</sup>C NMR** (150 MHz, CDCl<sub>3</sub>, TMS): δ 3.4, 7.7, 18.5, 23.0, 28.5, 35.8, 41.8, 75.7, 78.6, 211.5. **IR** (EtOH): ν 2950, 2938, 2859, 2199, 1713, 1458, 1375, 1114, 899 cm<sup>-1</sup>. **HRMS** (DART) *m/z*: [M+H]<sup>+</sup> Calcd. for C<sub>10</sub>H<sub>17</sub>O 153.1274; found 153.1274.

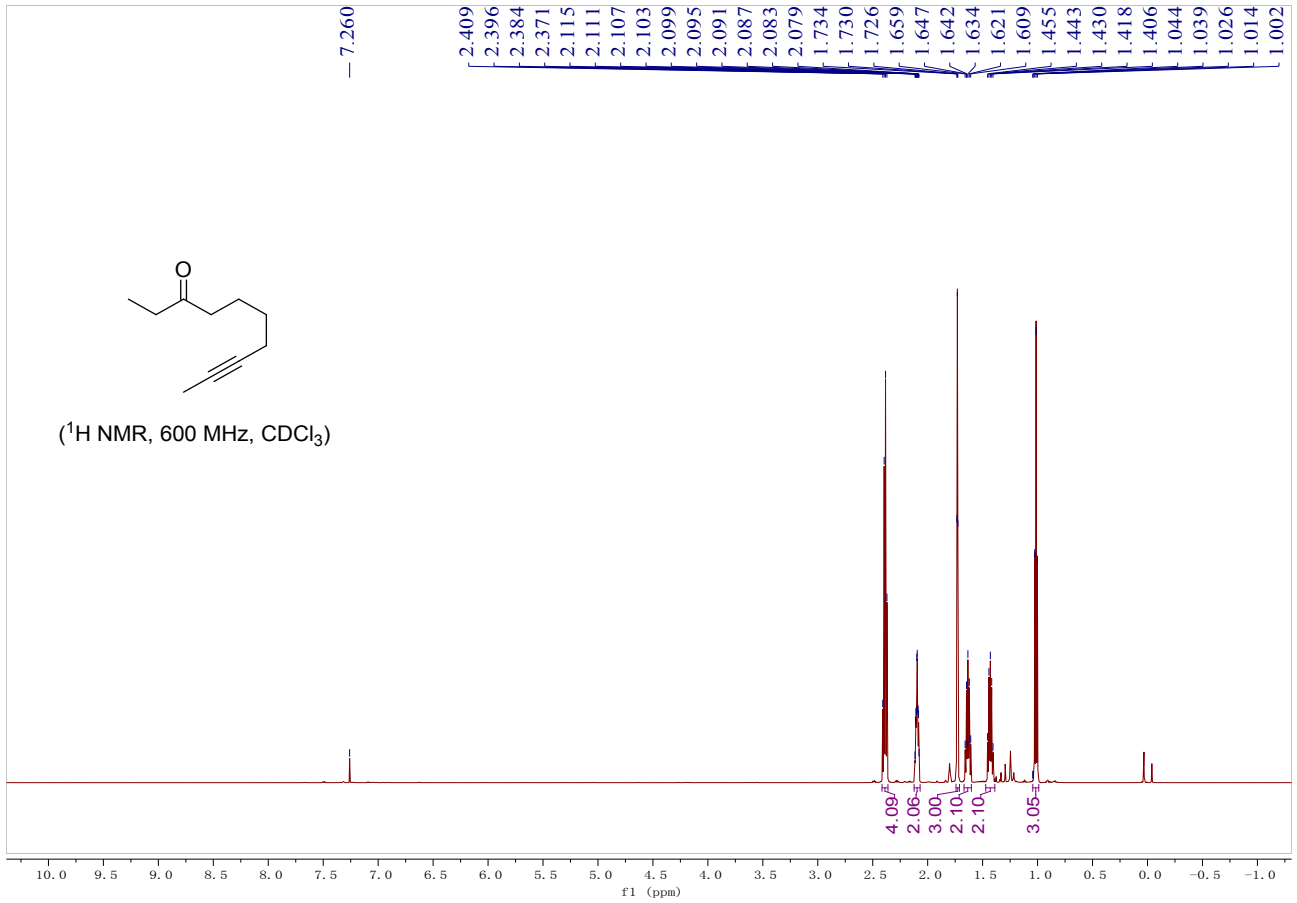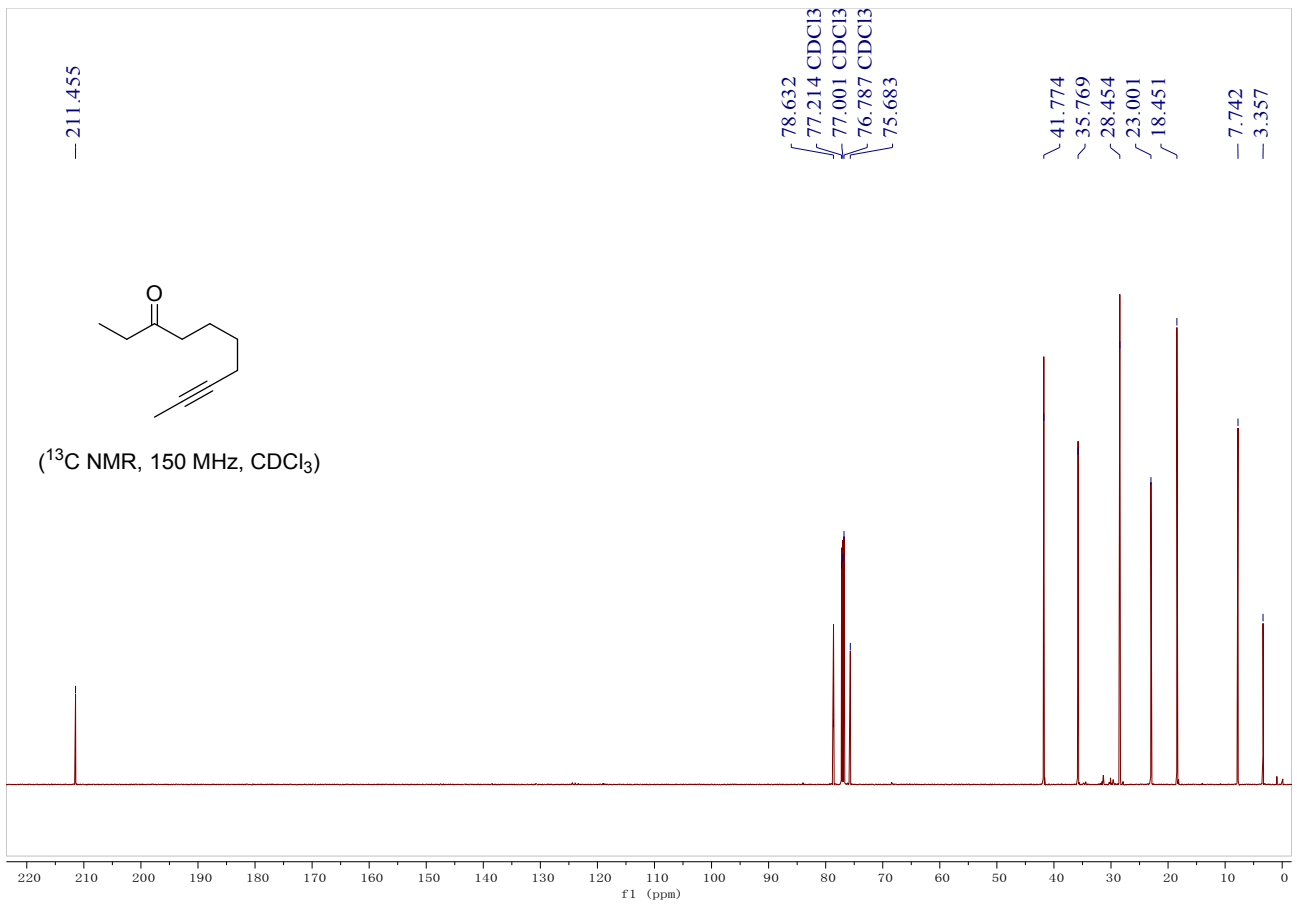

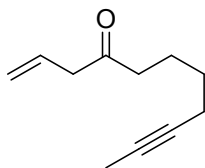

**Undec-1-en-9-yn-4-one (3bl)**: colorless oil, 13 mg, 38%, Eluent: PE/EA = 20/1.

**<sup>1</sup>H NMR** (400 MHz, CDCl<sub>3</sub>, TMS): δ 5.91 (ddt, *J* = 17.2, 10.2, 7.0 Hz, 1H), 5.22-5.08 (m, 2H), 3.17 (d, *J* = 7.0 Hz, 2H), 2.45 (t, *J* = 7.4 Hz, 2H), 2.13 (tq, *J* = 7.2, 2.6 Hz, 2H), 1.76 (t, *J* = 2.6 Hz, 3H), 1.73-1.62 (m, 2H), 1.50-1.42 (m, 2H). **<sup>13</sup>C NMR** (150 MHz, CDCl<sub>3</sub>, TMS): δ 3.4, 18.5, 22.8, 28.4, 41.8, 47.7, 75.8, 78.7, 118.8, 130.6, 208.6. **IR** (EtOH): ν 2954, 2920, 2853, 2223, 1709, 1459, 1377, 1260, 1079, 1018, 967, 797 cm<sup>-1</sup>. **HRMS** (DART) *m/z*: [M+H]<sup>+</sup> Calcd. for C<sub>11</sub>H<sub>17</sub>O 165.1274; found 165.1275.



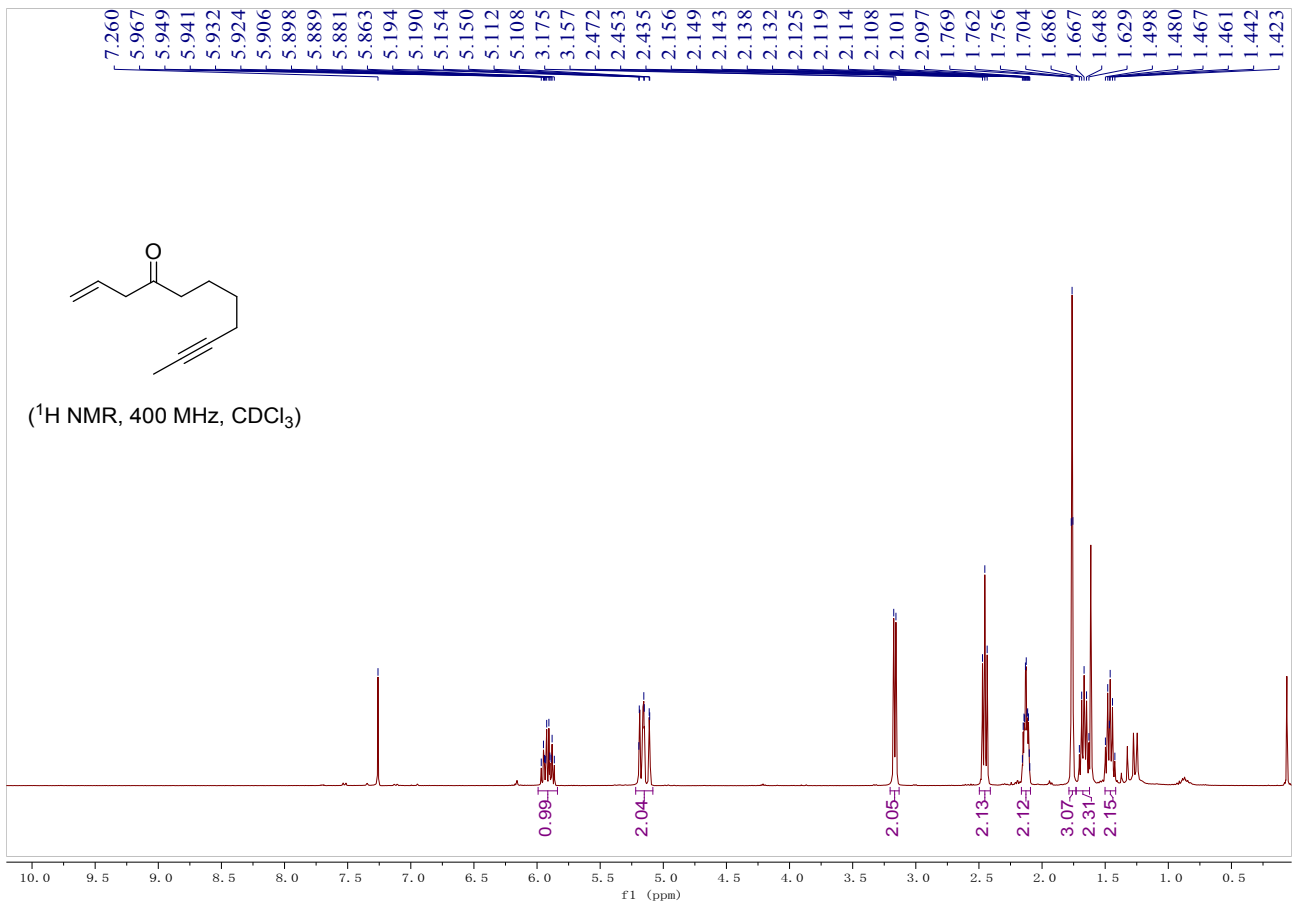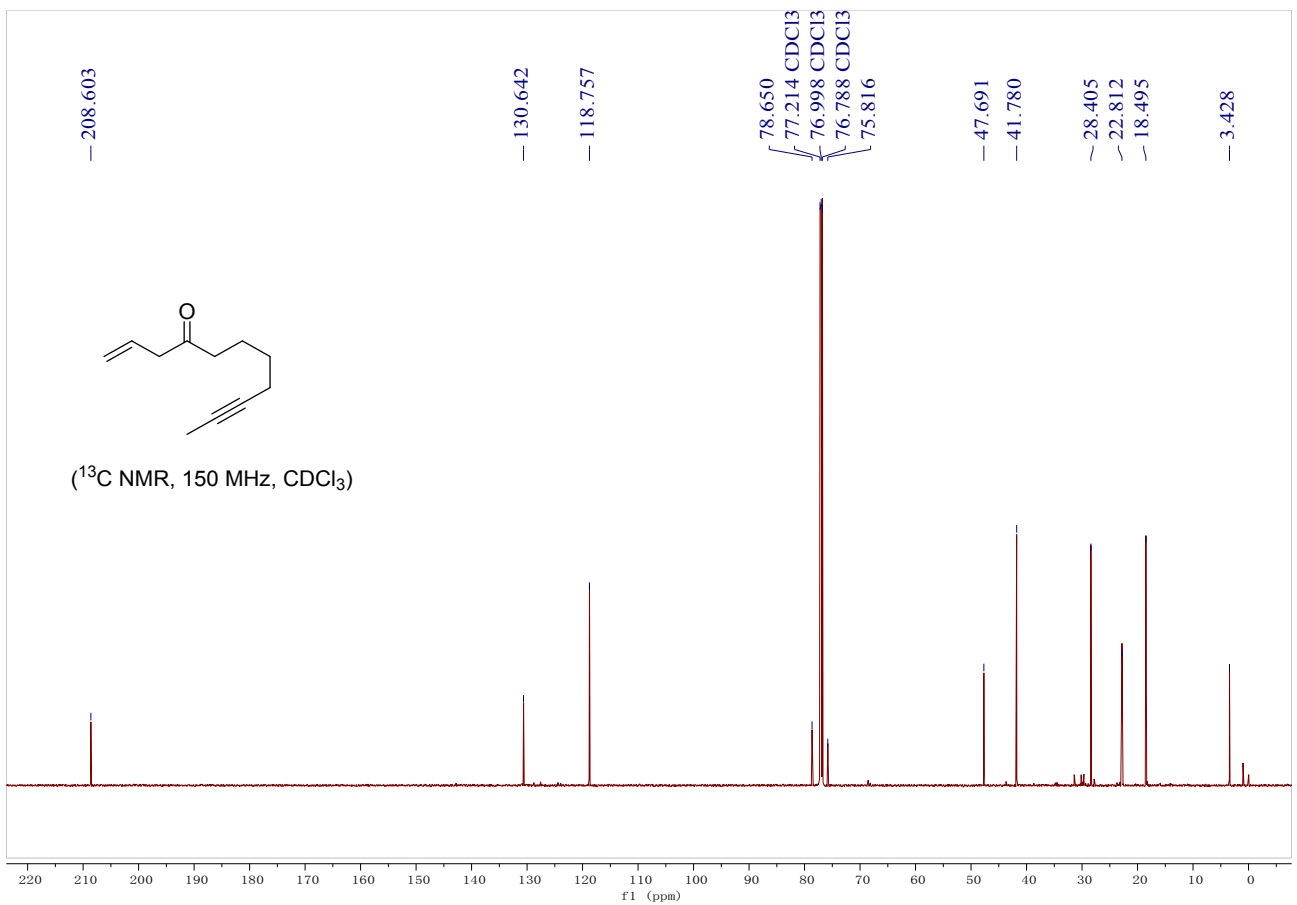

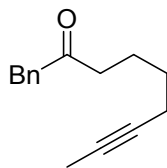

**1-phenylnon-7-yn-2-one (3bm)**: colorless oil, 15 mg, 36%, Eluent: PE/EA = 20/1.

**<sup>1</sup>H NMR** (400 MHz, CDCl<sub>3</sub>, TMS): δ 7.35-7.30 (m, 2H), 7.29-7.23 (m, 1H), 7.22-7.16 (m, 2H), 3.68 (s, 2H), 2.46 (t, *J* = 7.4 Hz, 2H), 2.09 (tq, *J* = 7.2, 2.6 Hz, 2H), 1.76 (t, *J* = 2.6 Hz, 3H), 1.69-1.61 (m, 2H), 1.46-1.37 (m, 2H). **<sup>13</sup>C NMR** (100 MHz, CDCl<sub>3</sub>, TMS): δ 3.4, 18.4, 22.8, 28.3, 41.4, 50.1, 75.8, 78.7, 127.0, 128.7, 129.4, 134.3, 208.2. **IR** (EtOH): ν 2972, 2939, 2855, 2218, 1713, 1458, 1354, 1114, 1005, 955, 845, 767, 699 cm<sup>-1</sup>. **HRMS** (DART) *m/z*: [M+H]<sup>+</sup> Calcd. for C<sub>15</sub>H<sub>19</sub>O 215.1430; found 215.1430.

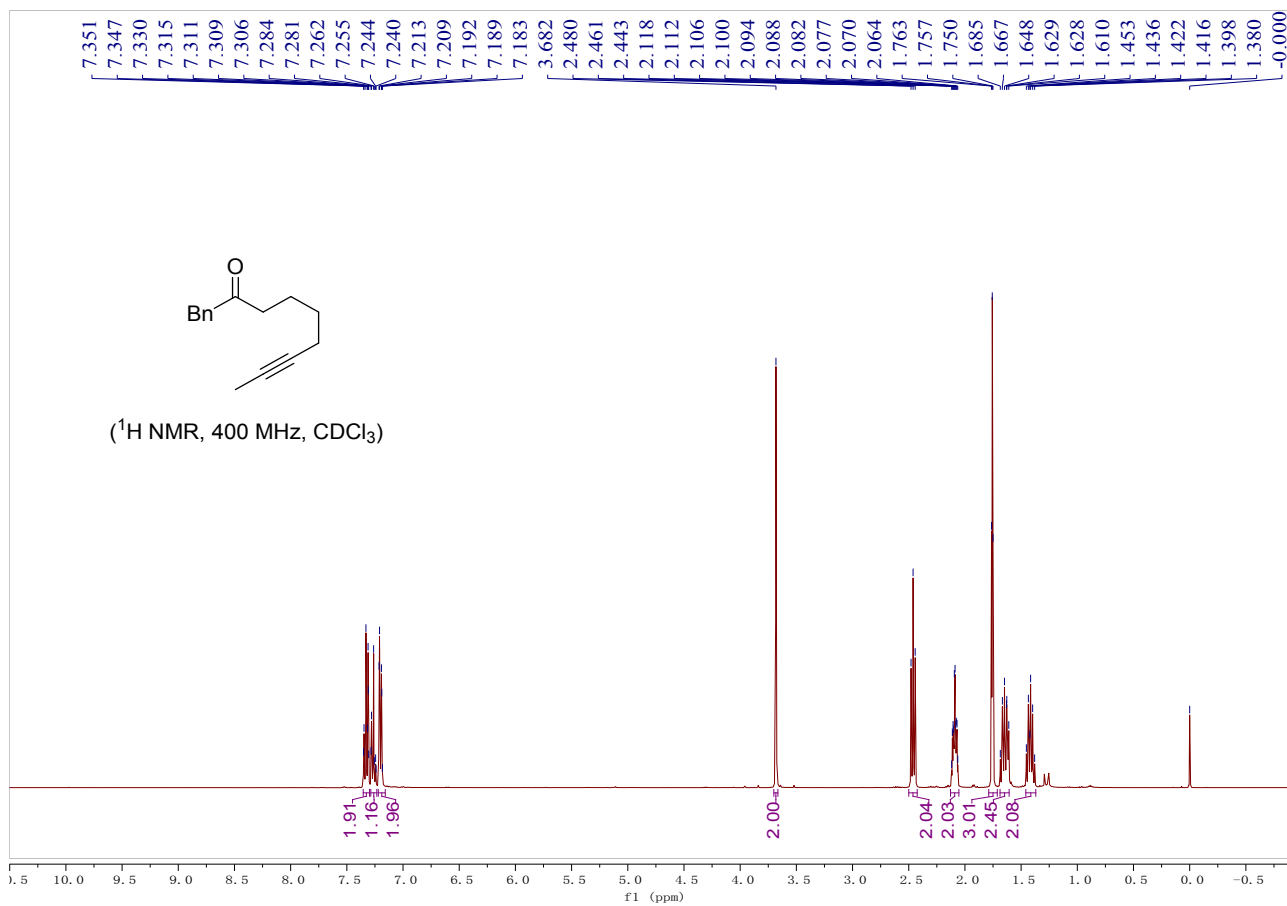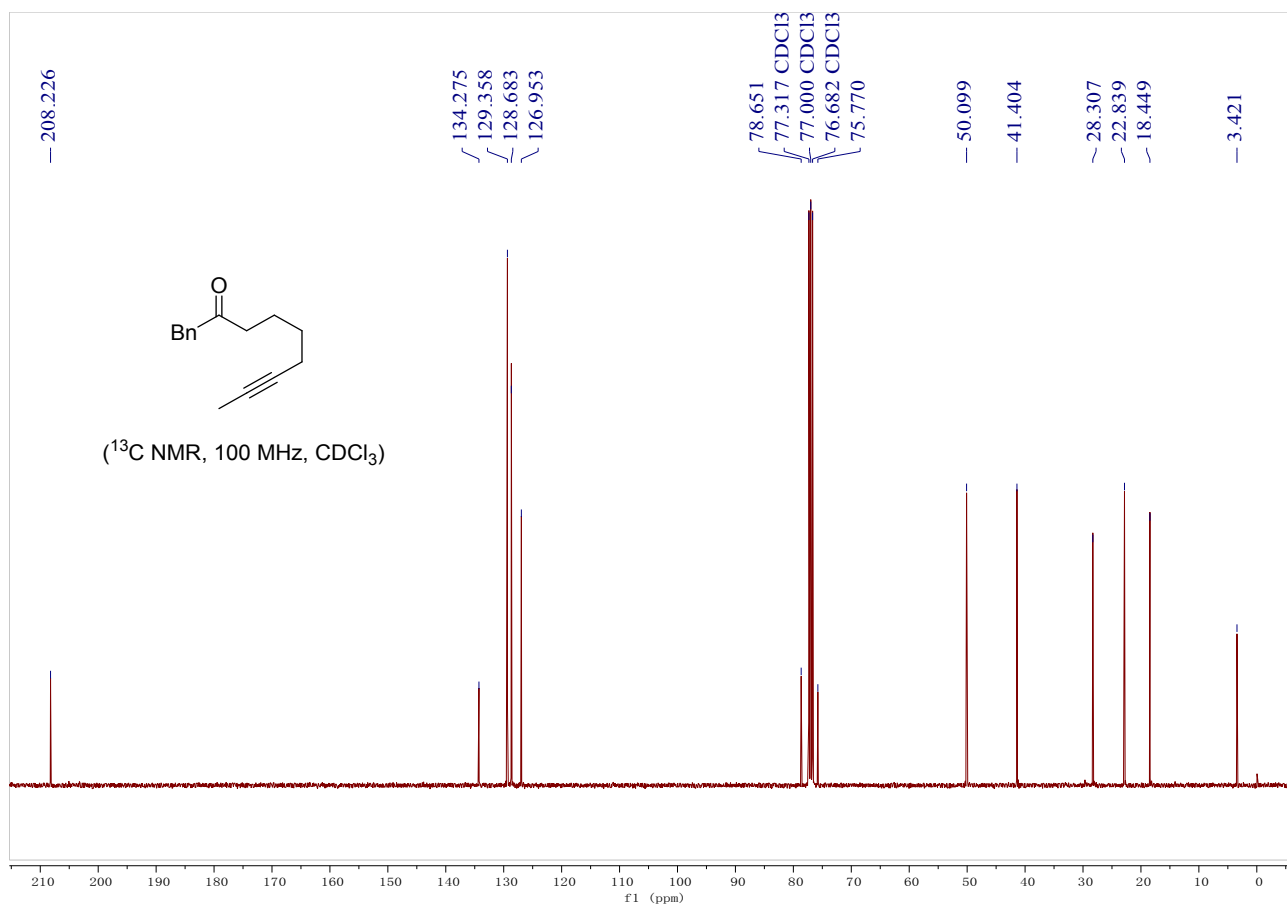

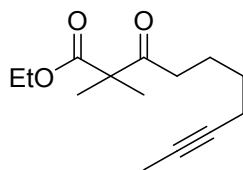

**Ethyl 2,2-dimethyl-3-oxodec-8-ynoate (3bn):** colorless oil, 19 mg, 40%, Eluent: PE/EA = 20/1.

**<sup>1</sup>H NMR** (400 MHz, CDCl<sub>3</sub>, TMS): δ 4.11 (q, *J* = 7.2 Hz, 2H), 2.40 (t, *J* = 7.2 Hz, 2H), 2.05 (tq, *J* = 7.2, 2.6 Hz, 2H), 1.68 (t, *J* = 2.6 Hz, 3H), 1.64-1.55 (m, 2H), 1.44-1.33 (m, 2H), 1.28 (s, 6H), 1.19 (t, *J* = 7.2 Hz, 3H). **<sup>13</sup>C NMR** (100 MHz, CDCl<sub>3</sub>, TMS): δ 3.2, 13.8, 18.3, 21.6, 22.9, 28.2, 37.2, 55.3, 61.0, 75.5, 78.4, 173.4, 207.5. **IR** (EtOH): ν 2980, 2938, 2865, 2216, 1713, 1640, 1459, 1375, 1114 cm<sup>-1</sup>. **HRMS** (DART) *m/z*: [M+H]<sup>+</sup> Calcd. for C<sub>14</sub>H<sub>23</sub>O<sub>3</sub> 239.1642; found 239.1641.

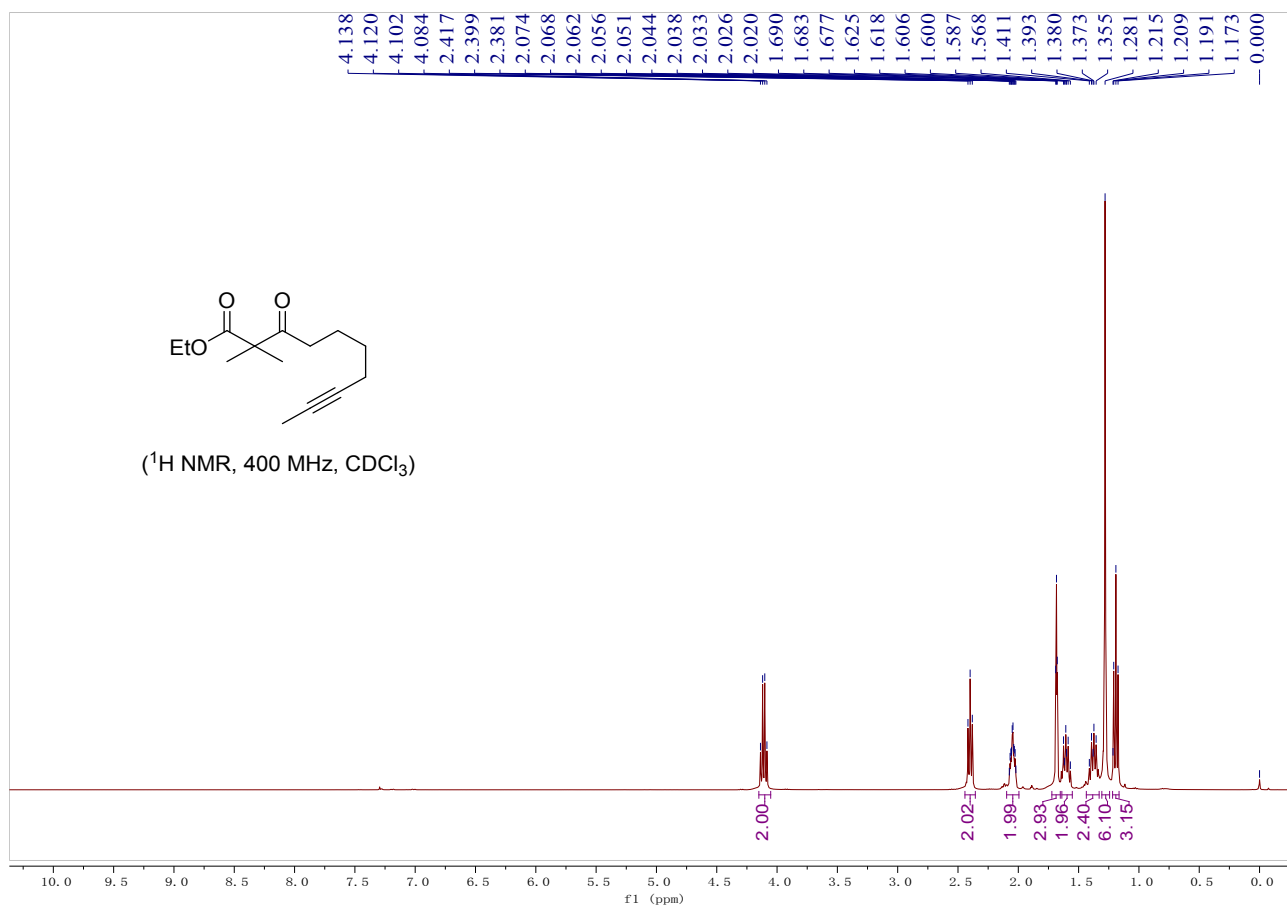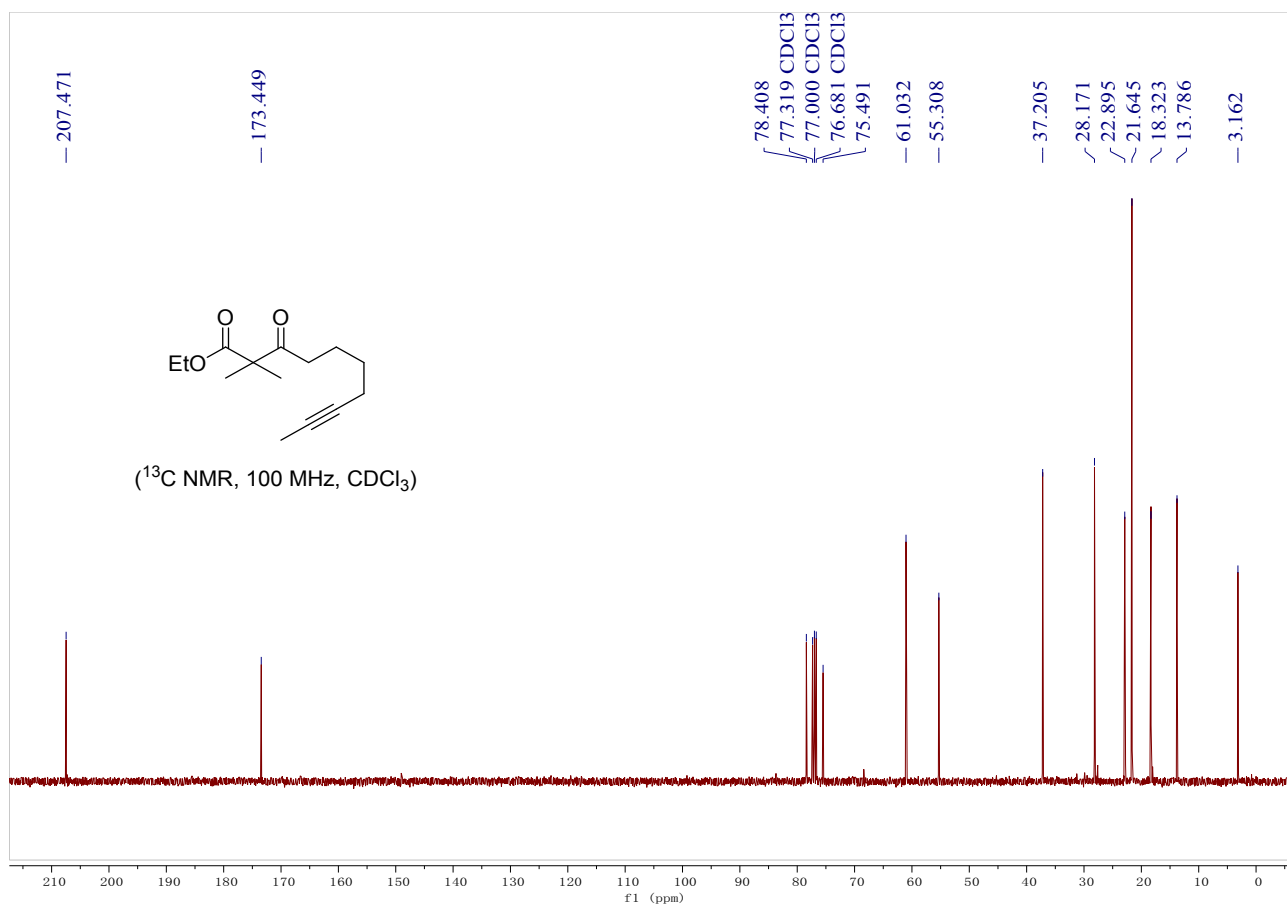

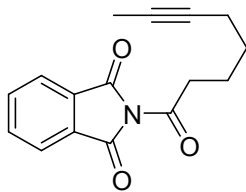

**2-(oct-6-ynoyl)isoindoline-1,3-dione (3bo):** colorless oil, 17 mg, 33%, Eluent: PE/EA = 5/1.

**<sup>1</sup>H NMR** (600 MHz, CDCl<sub>3</sub>, TMS):  $\delta$  7.89 (dd,  $J = 5.4, 3.1$  Hz, 2H), 7.79 (dd,  $J = 5.4, 3.1$  Hz, 2H), 2.70 (t,  $J = 7.5$  Hz, 2H), 2.24-2.18 (m, 2H), 1.90 (p,  $J = 7.6$  Hz, 2H), 1.79 (t,  $J = 2.6$  Hz, 3H), 1.66-1.60 (m, 2H). **<sup>13</sup>C NMR** (150 MHz, CDCl<sub>3</sub>, TMS):  $\delta$  3.5, 23.7, 27.9, 30.5, 76.2, 78.2, 123.9, 128.9, 134.7, 162.0, 169.4. **IR** (EtOH):  $\nu$  3128, 2949, 2861, 2216, 1787, 1706, 1607, 1463, 1383, 1176, 1134, 1118, 973, 880, 781, 694 cm<sup>-1</sup>. **HRMS** (ESI)  $m/z$ : [M+H]<sup>+</sup> Calcd. for C<sub>16</sub>H<sub>16</sub>NO<sub>3</sub> 270.1125; found 270.1122.

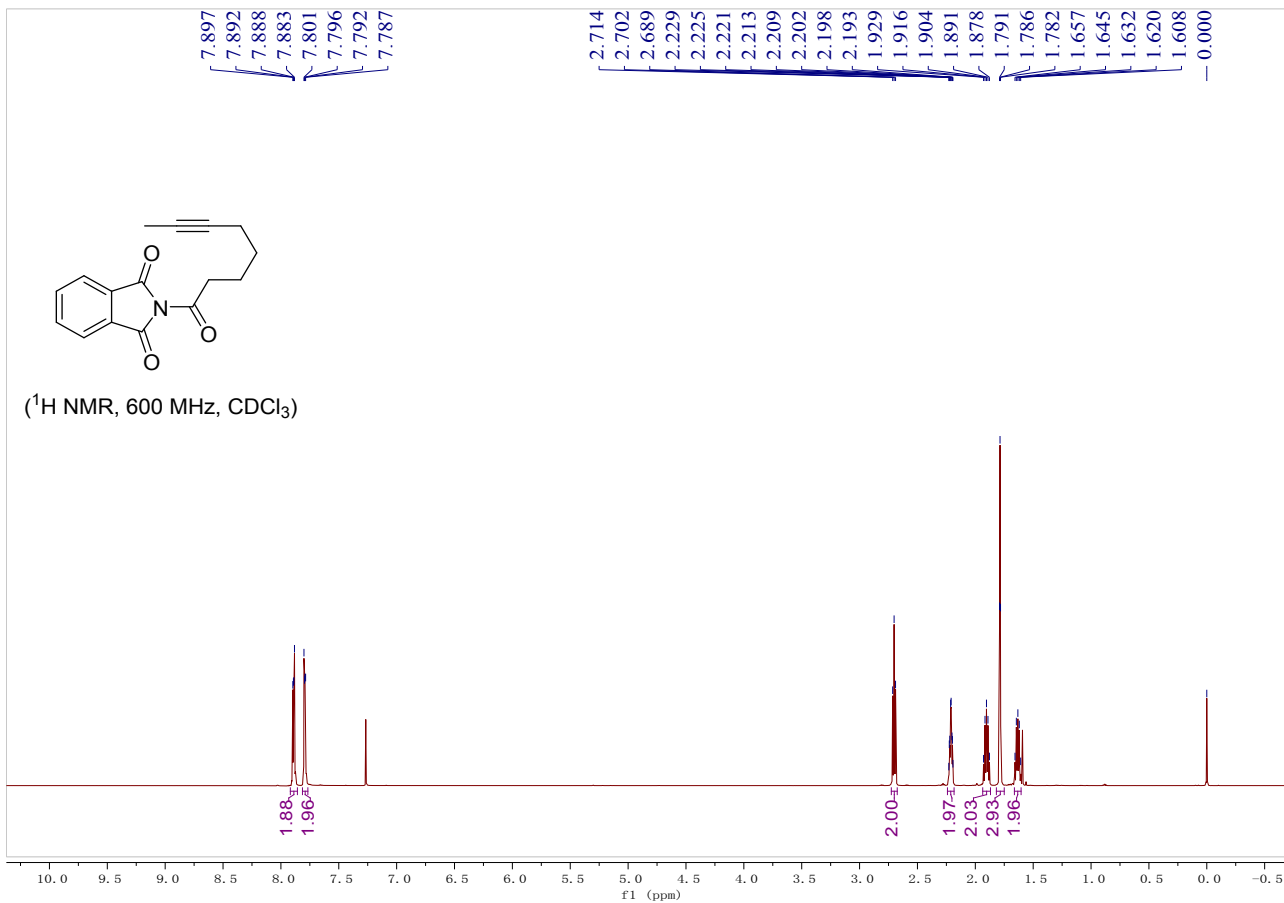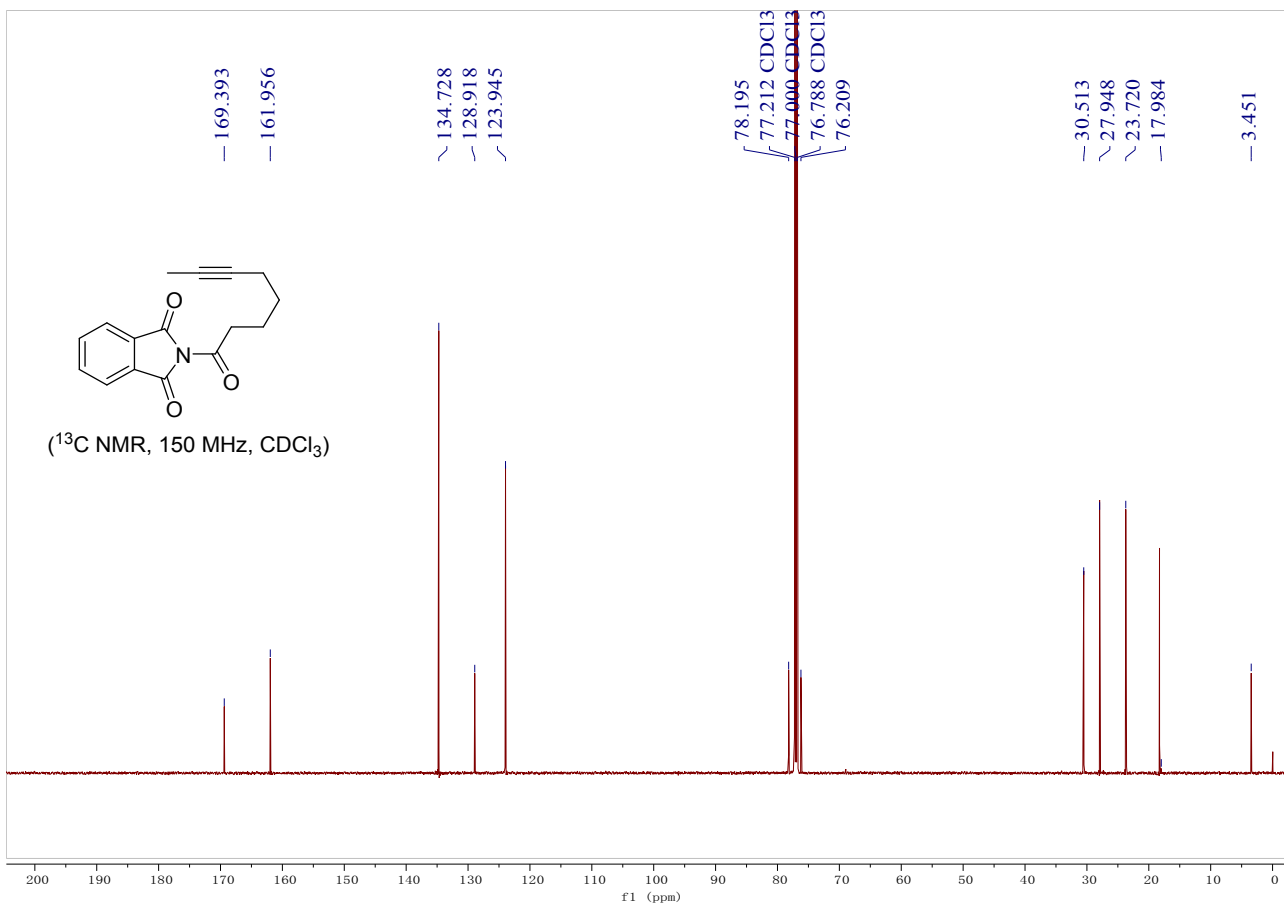

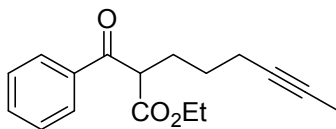

**1-phenyloct-6-yn-1-one (3bp)**: colorless oil, 34 mg, 87%, Eluent: PE/EA = 20/1.

**<sup>1</sup>H NMR** (400 MHz, CDCl<sub>3</sub>, TMS): δ 8.03-7.97 (m, 2H), 7.59 (t, *J* = 7.4 Hz, 1H), 7.52-7.44 (m, 2H), 4.34 (t, *J* = 7.2 Hz, 1H), 4.15 (q, *J* = 7.2 Hz, 2H), 2.19 (tq, *J* = 7.2, 2.4 Hz, 2H), 2.14-2.09 (m, 2H), 1.74 (t, *J* = 2.4 Hz, 3H), 1.58-1.48 (m, 3H), 1.17 (t, *J* = 7.2 Hz, 3H). **<sup>13</sup>C NMR** (100 MHz, CDCl<sub>3</sub>, TMS): δ 3.4, 14.0, 18.5, 26.8, 28.1, 53.8, 61.4, 76.2, 78.3, 128.6, 128.7, 133.5, 136.2, 169.9, 195.1. **IR** (EtOH): ν 2975, 2895, 2230, 1648, 1599, 1462, 1381, 1307, 1086, 1044, 879, 739, 693 cm<sup>-1</sup>. **HRMS** (EI) *m/z*: [M]<sup>+</sup> Calcd. for C<sub>17</sub>H<sub>18</sub>O<sub>3</sub> 270.1250; found 270.1248.



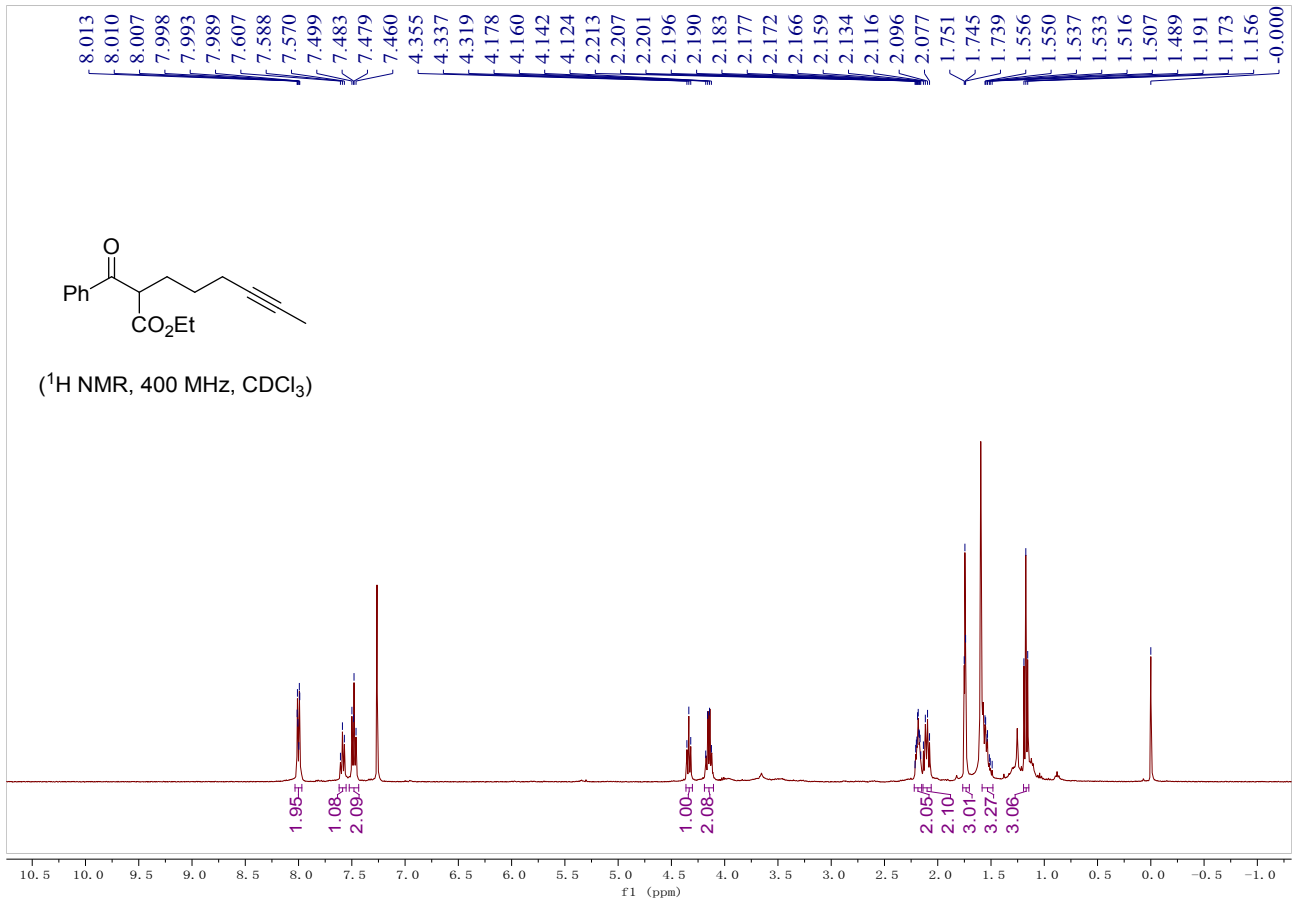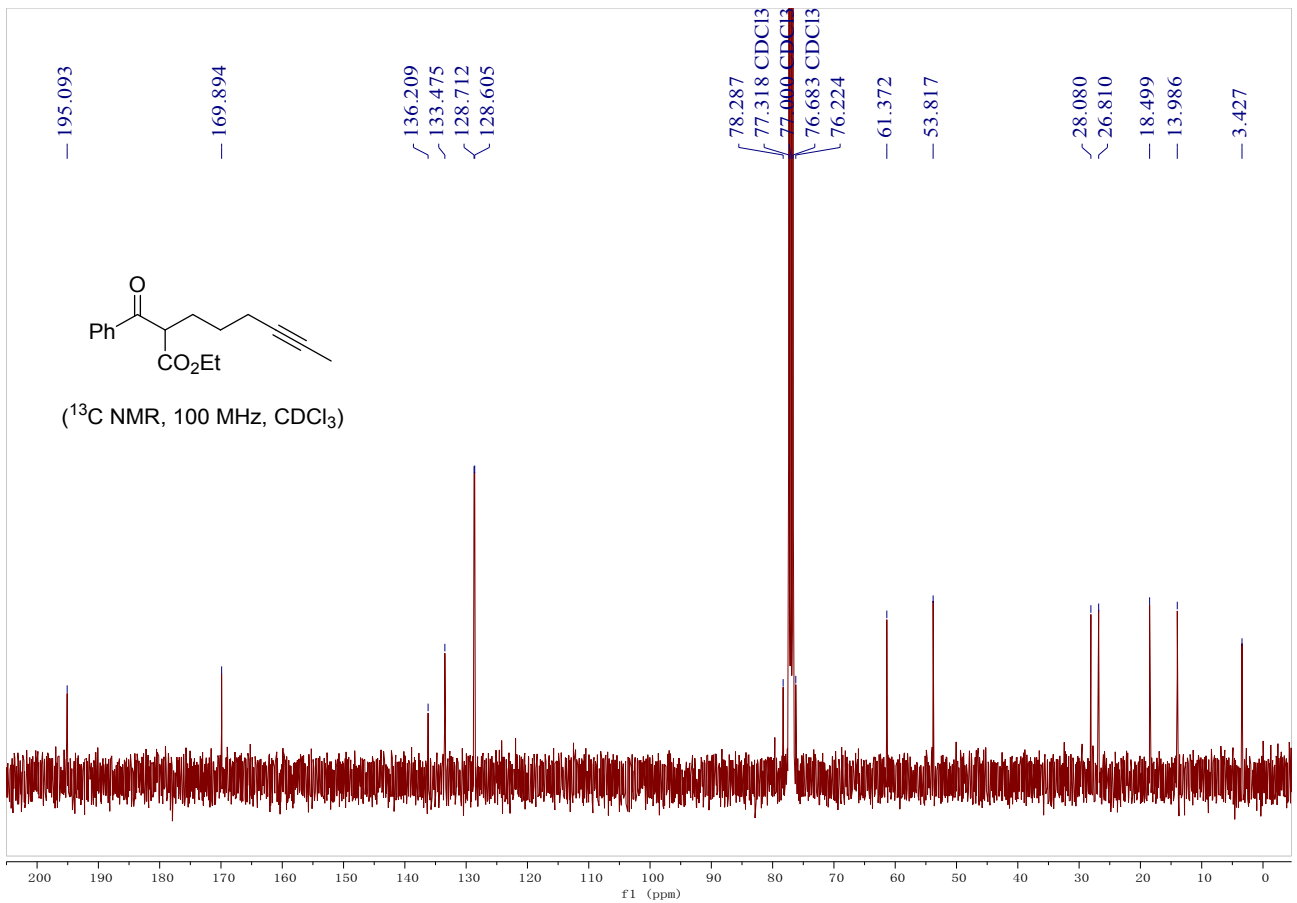

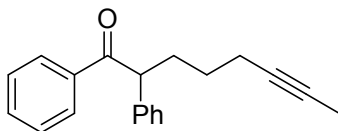

**1,2-diphenyloct-6-yn-1-one (3bq)**: colorless oil, 45 mg, 81%, Eluent: PE/EA = 20/1.

**<sup>1</sup>H NMR** (400 MHz, CDCl<sub>3</sub>, TMS): δ 8.01-7.93 (m, 2H), 7.51-7.44 (m, 1H), 7.41-7.35 (m, 2H), 7.34-7.25 (m, 4H), 7.23-7.17 (m, 1H), 4.58 (t, *J* = 7.2 Hz, 1H), 2.31-2.21 (m, 1H), 2.18-2.10 (m, 2H), 1.99-1.88 (m, 1H), 1.74 (t, *J* = 2.4 Hz, 3H), 1.54-1.37 (m, 2H). **<sup>13</sup>C NMR** (100 MHz, CDCl<sub>3</sub>, TMS): δ 3.4, 18.7, 26.9, 33.1, 53.1, 75.9, 78.7, 127.0, 128.2, 128.5, 128.6, 128.9, 132.8, 136.8, 139.5, 199.8. **IR** (EtOH): ν 2976, 2945, 2897, 2211, 1647, 1524, 1472, 1381, 1086, 1044, 1005, 879, 800, 724, 699, 638 cm<sup>-1</sup>. **HRMS** (EI) *m/z*: [M]<sup>+</sup> Calcd. for C<sub>20</sub>H<sub>20</sub>O 276.1509; found 276.1501.

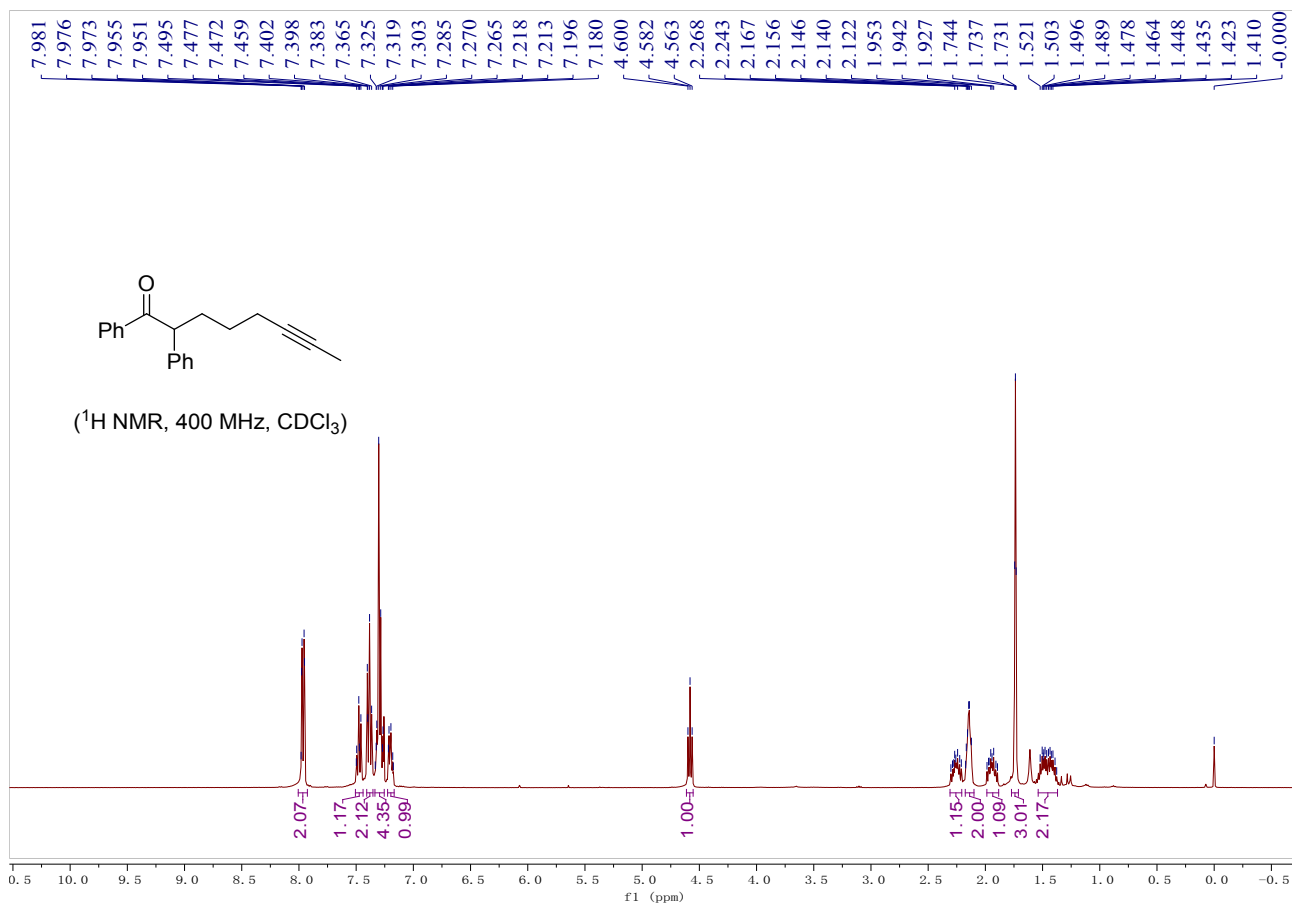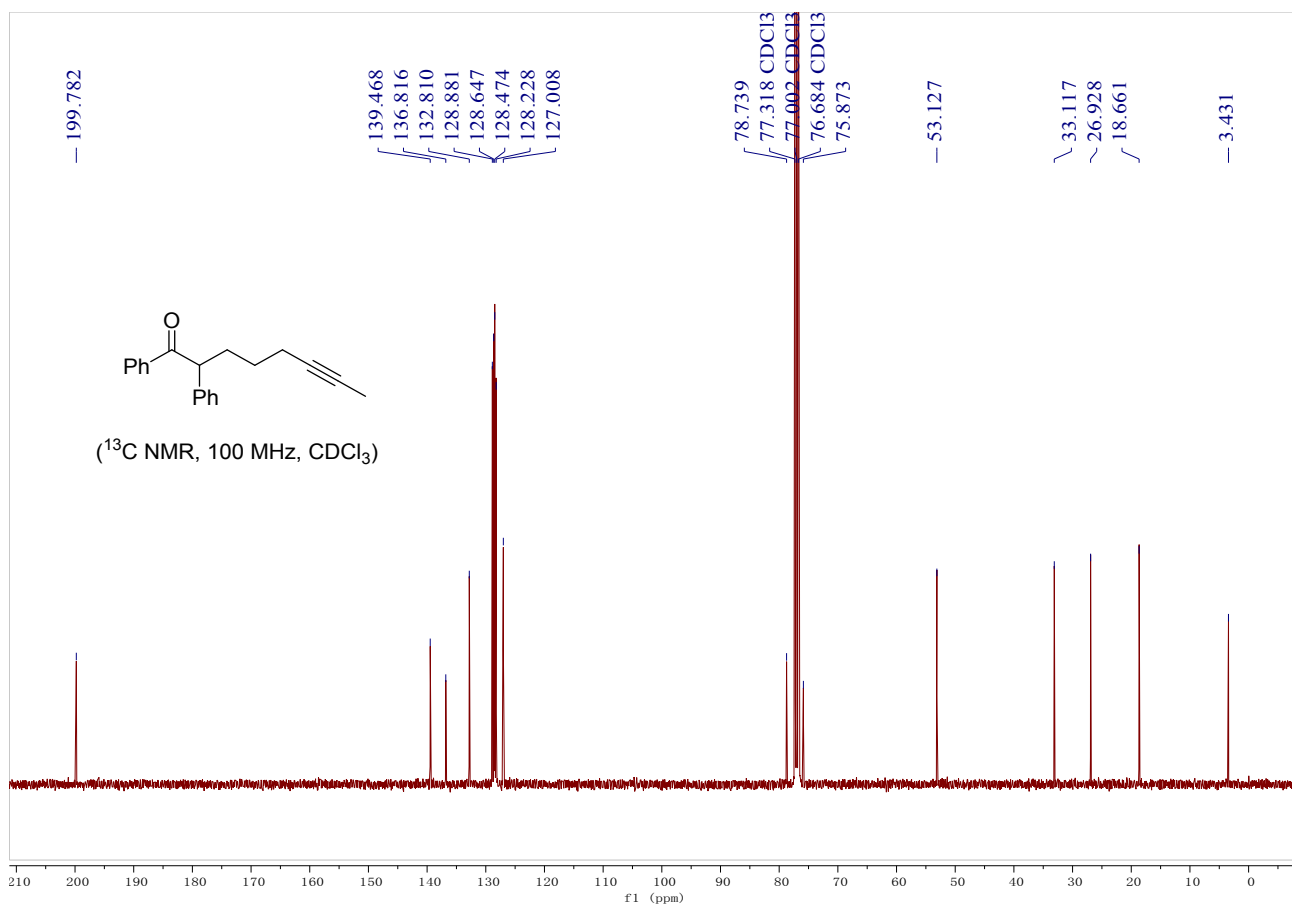

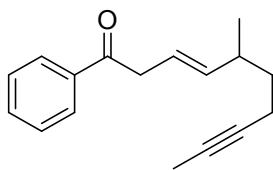

**(E)-5-Methyl-1-phenyldec-3-en-8-yn-1-one (3br):** colorless oil, 44 mg, 92%, Eluent: PE/EA = 20/1. **(instable)**

**<sup>1</sup>H NMR** (400 MHz, CDCl<sub>3</sub>, TMS): δ 7.99-7.95 (m, 2H), 7.59-7.54 (m, 1H), 7.50-7.44 (m, 2H), 5.74-5.62 (m, 1H), 5.44 (dd, *J* = 15.6, 7.8 Hz, 1H), 3.69 (dd, *J* = 6.8, 1.4 Hz, 2H), 2.33-2.24 (m, 1H), 2.13-2.04 (m, 2H), 1.76 (t, *J* = 2.6 Hz, 3H), 1.49-1.42 (m, 2H), 0.99 (d, *J* = 6.8 Hz, 3H). **<sup>13</sup>C NMR** (100 MHz, CDCl<sub>3</sub>, TMS): δ 3.5, 16.6, 20.1, 35.9, 36.0, 42.5, 75.5, 79.1, 121.4, 128.3, 128.6, 133.0, 136.6, 139.7, 198.6. **IR** (EtOH): ν 2930, 2921, 2852, 2200, 1666, 1628, 1450, 1272, 1181, 1079, 973, 759, 694 cm<sup>-1</sup>. **HRMS** (EI) *m/z*: [M]<sup>+</sup> Calcd. for C<sub>17</sub>H<sub>18</sub>O 238.1352; found 238.1349.

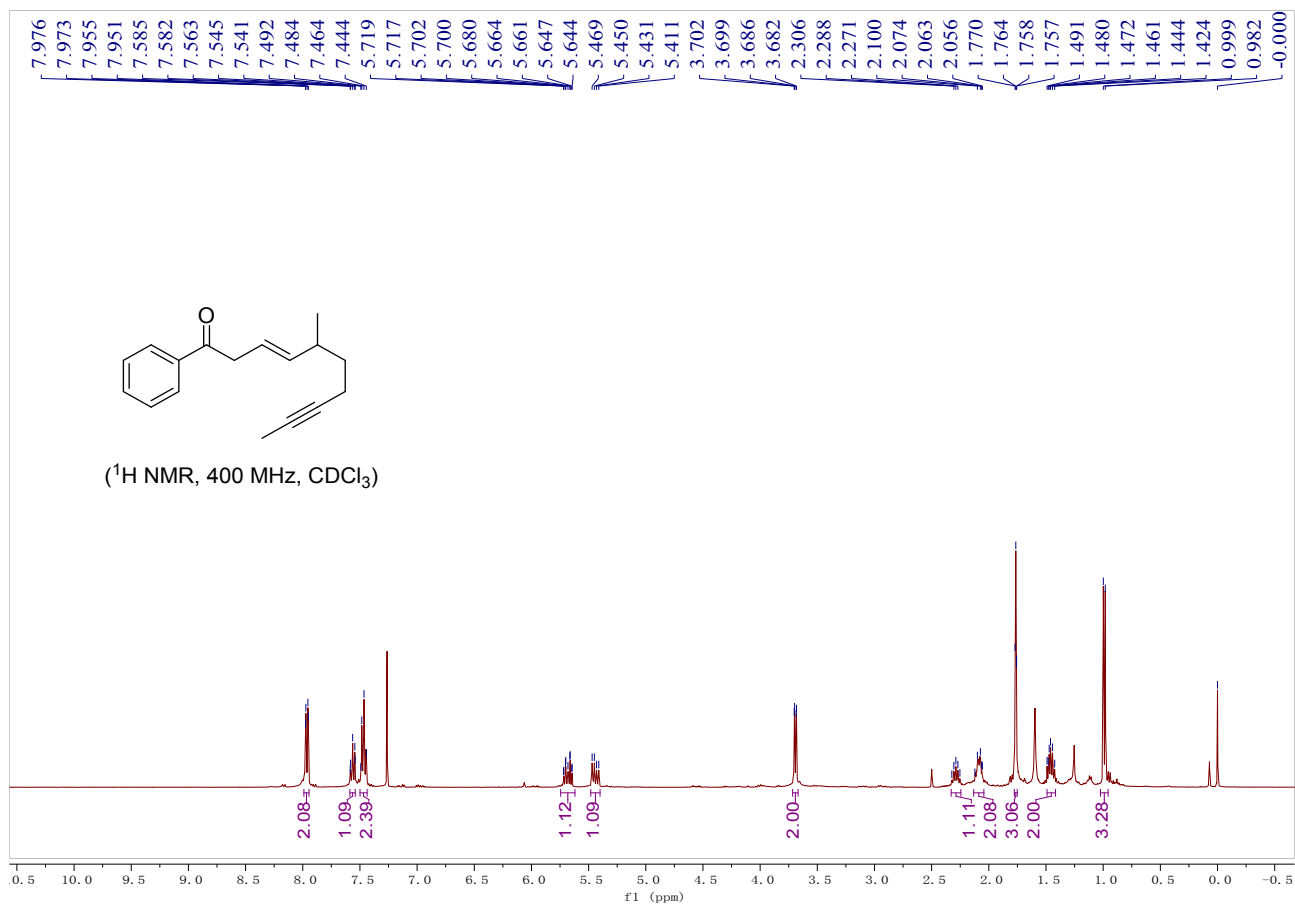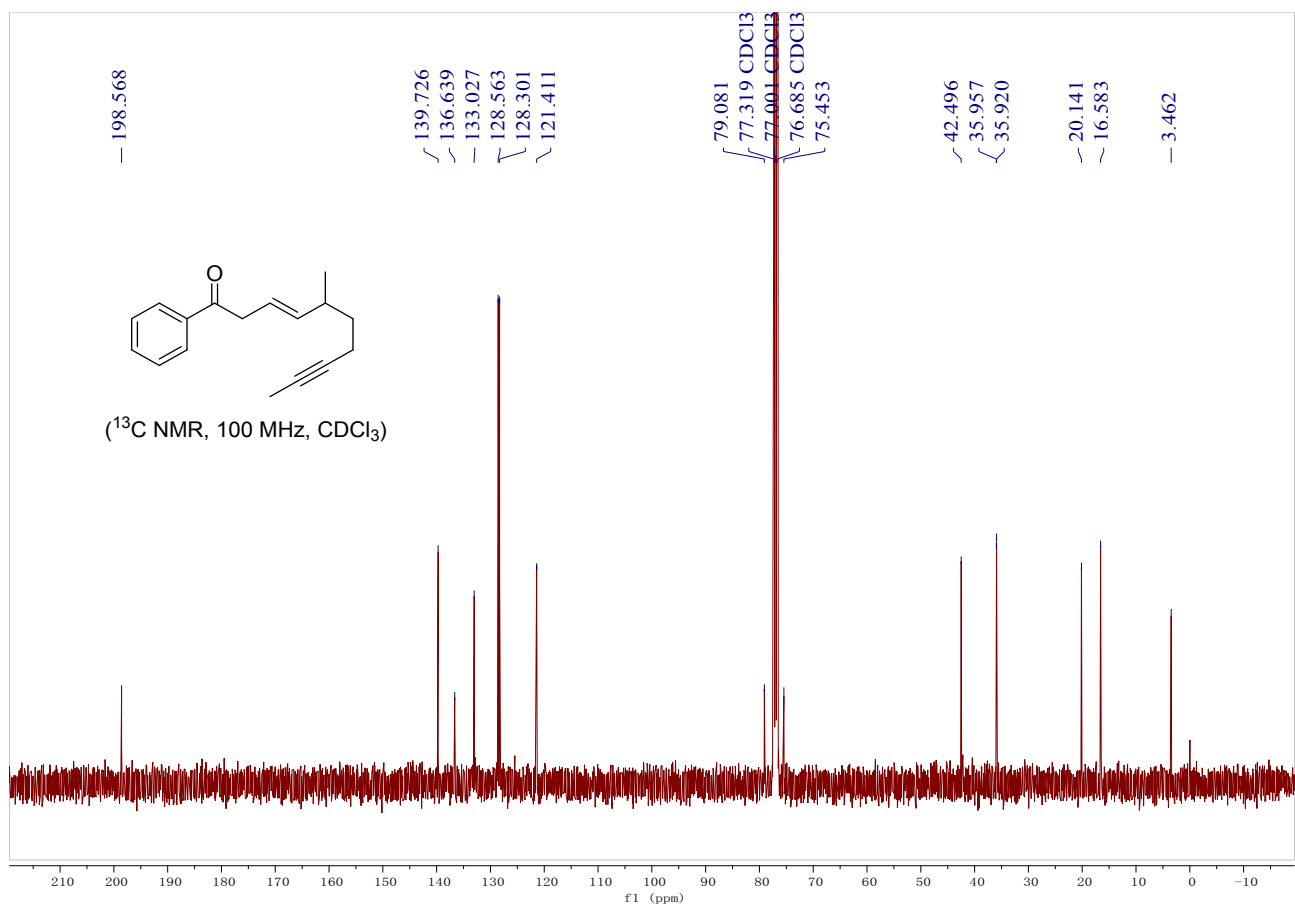

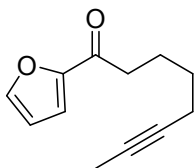

**1-(furan-2-yl)oct-6-yn-1-one (3bs):** colorless oil, 26 mg, 67%, Eluent: PE/EA = 20/1. **(instable)**

**<sup>1</sup>H NMR** (600 MHz, CDCl<sub>3</sub>, TMS): δ 7.58 (s, 1H), 7.18 (d, *J* = 3.6 Hz, 1H), 6.53 (d, *J* = 3.6 Hz, 1H), 2.84 (t, *J* = 7.6 Hz, 2H), 2.21-2.16 (m, 2H), 1.85-1.75 (m, 5H), 1.61-1.53 (m, 2H). **<sup>13</sup>C NMR** (150 MHz, CDCl<sub>3</sub>, TMS): δ 3.4, 18.5, 23.4, 28.5, 37.9, 75.9, 78.7, 112.1, 116.8, 146.2, 152.8, 189.4. **IR** (EtOH): ν 2946, 2920, 2199, 1669, 1524, 1399, 1289, 1203, 1003, 862, 755, 725 cm<sup>-1</sup>.

**HRMS** (ESI) *m/z*: [M+Na]<sup>+</sup> Calcd. for C<sub>12</sub>H<sub>14</sub>O<sub>2</sub>Na 213.0886; found 213.0889.

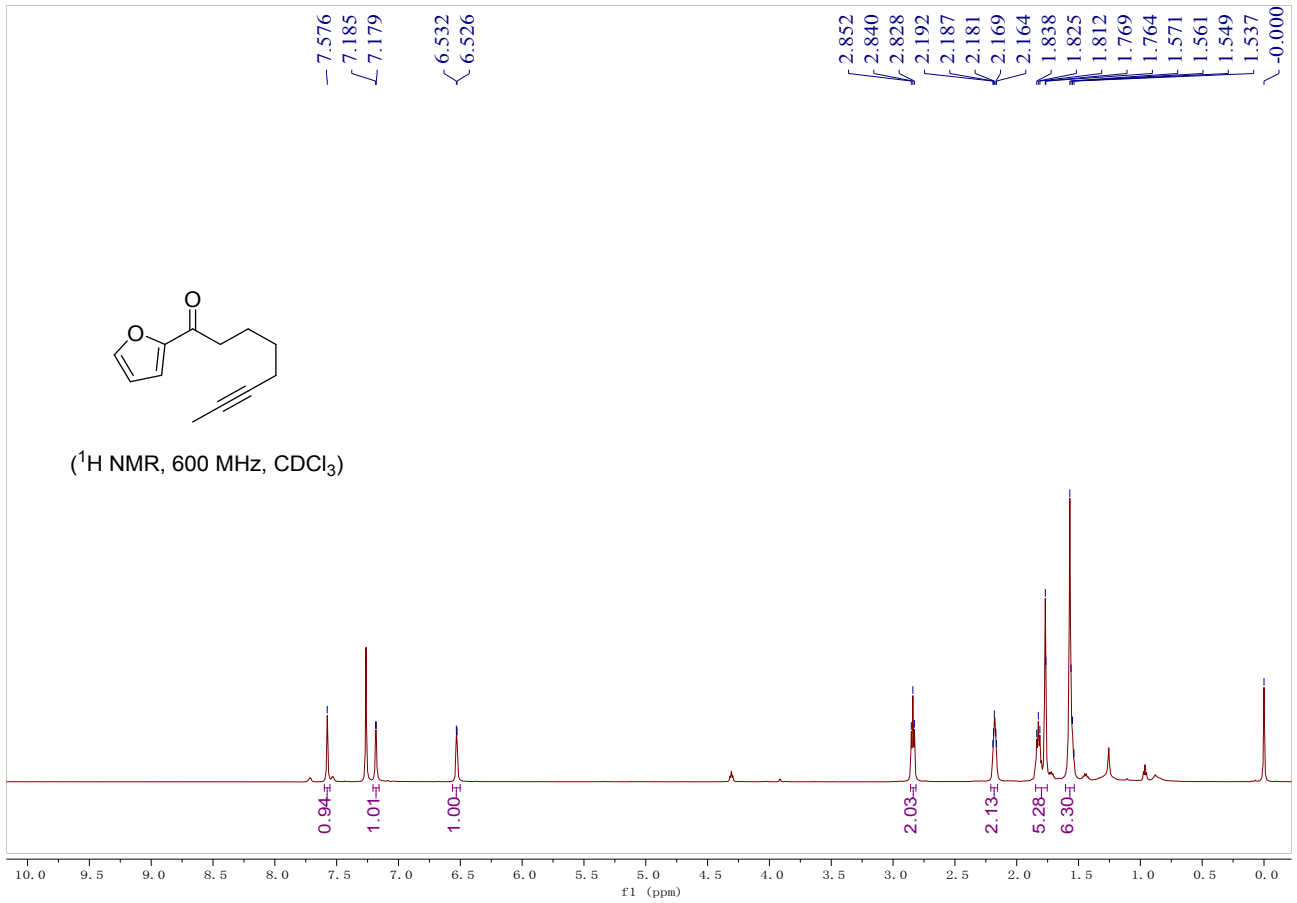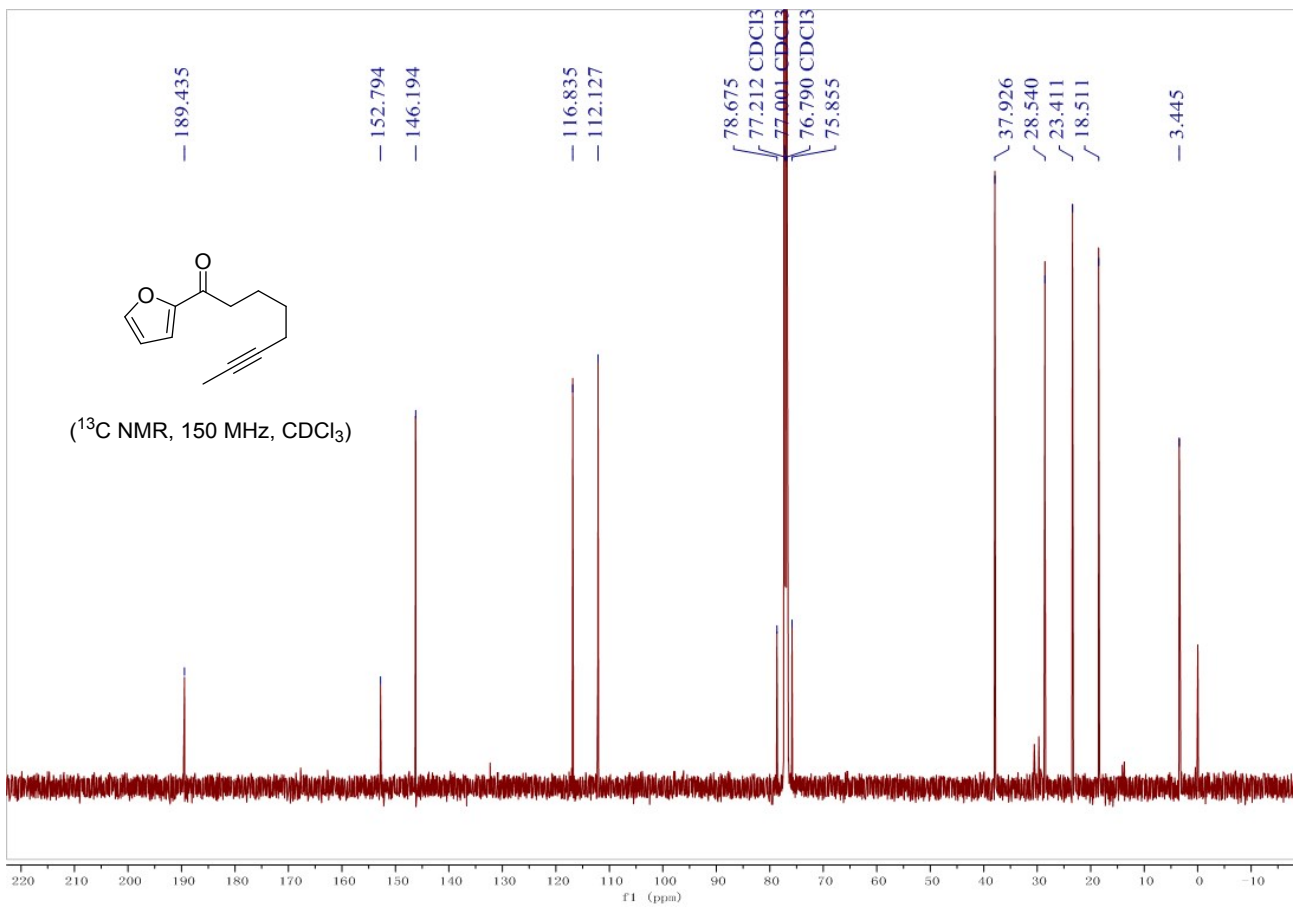

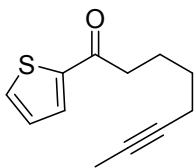

**1-(thiophen-2-yl)oct-6-yn-1-one (3bt)**: colorless oil, 36 mg, 87%, Eluent: PE/EA = 20/1.

**<sup>1</sup>H NMR** (400 MHz, CDCl<sub>3</sub>, TMS): δ 7.72 (dd, *J* = 3.8, 1.2 Hz, 1H), 7.63 (dd, *J* = 5.0, 1.2 Hz, 1H), 7.13 (dd, *J* = 5.0, 3.8 Hz, 1H), 2.95-2.89 (m, 2H), 2.19 (tq, *J* = 7.2, 2.6 Hz, 2H), 1.91-1.81 (m, 2H), 1.77 (t, *J* = 2.6 Hz, 3H), 1.62-1.52 (m, 2H). **<sup>13</sup>C NMR** (150 MHz, CDCl<sub>3</sub>, TMS): δ 3.4, 18.5, 23.9, 28.5, 38.8, 75.9, 78.7, 128.0, 131.7, 133.4, 144.4, 193.1. **IR** (EtOH): ν 2960, 2899, 2209, 1662, 1600, 1544, 1385, 1377, 1279, 1065, 857, 735 cm<sup>-1</sup>. **HRMS** (EI) *m/z*: [M]<sup>+</sup> Calcd. for C<sub>12</sub>H<sub>13</sub>OS 205.0682; found 205.0675.



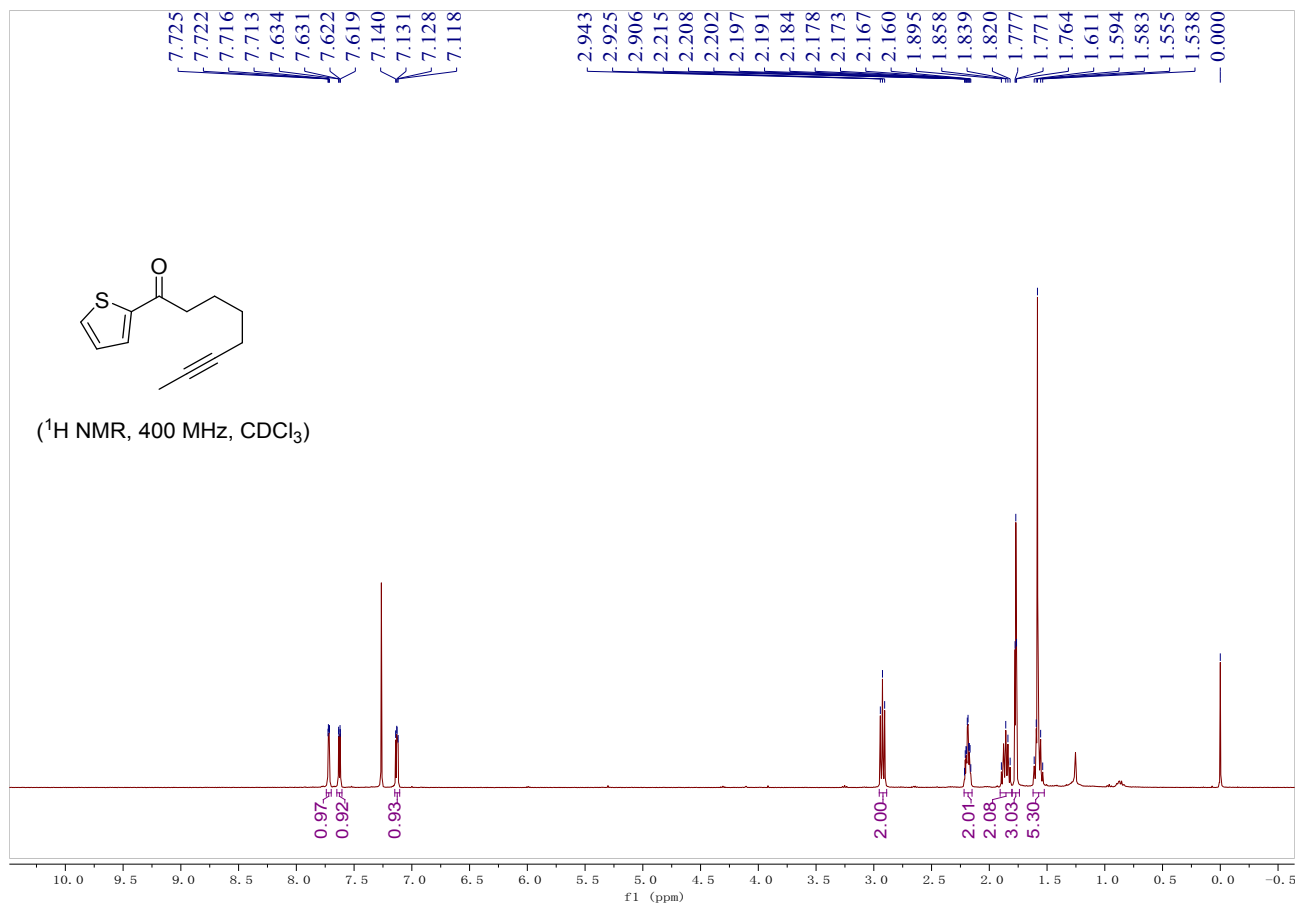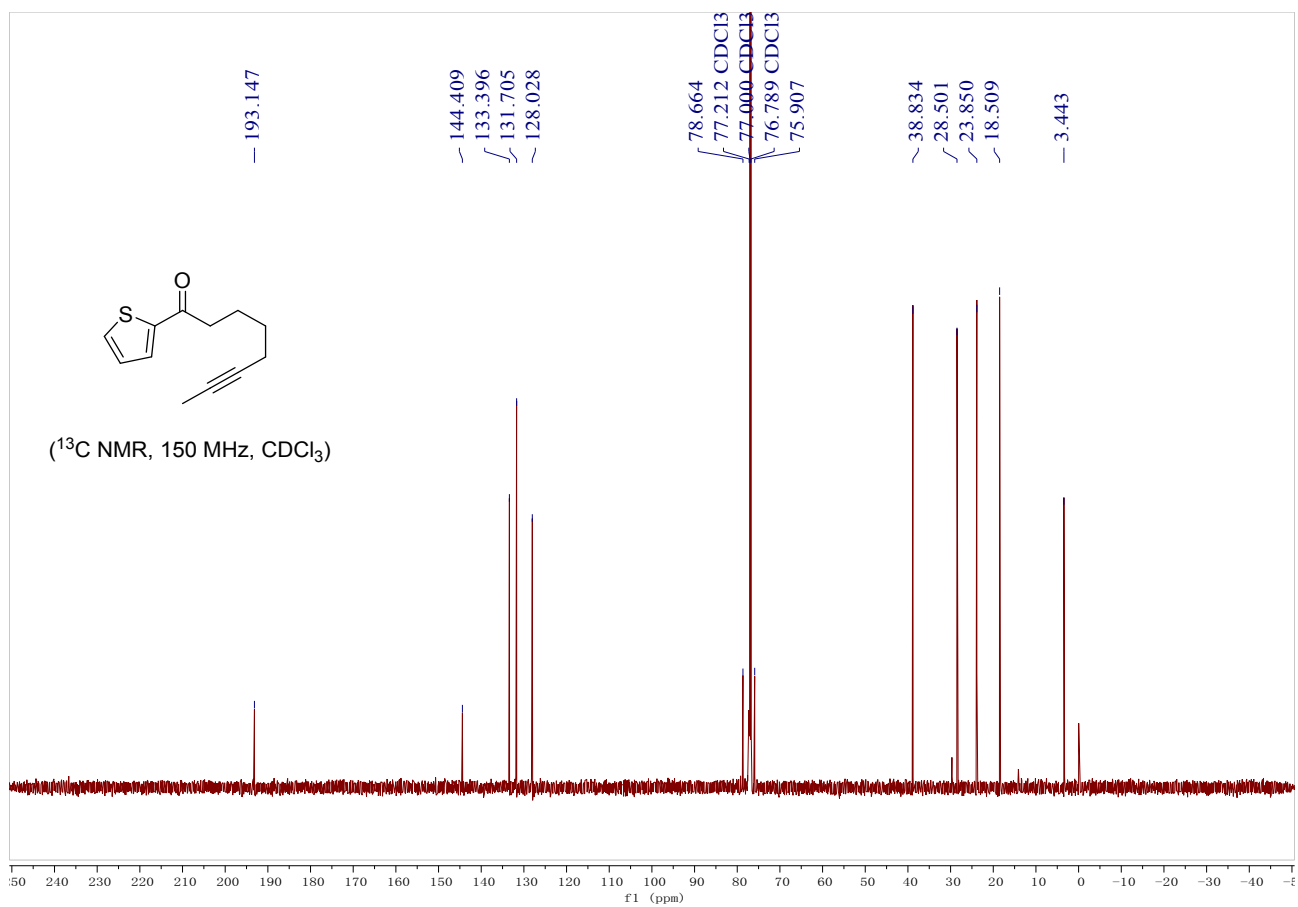

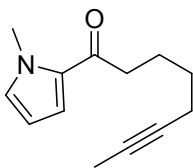

**1-(1-methyl-1*H*-pyrrol-2-yl)oct-6-yn-1-one (3bu)**: colorless oil, 38 mg, 93%, Eluent: PE/EA = 20/1.

**<sup>1</sup>H NMR** (400 MHz, CDCl<sub>3</sub>, TMS): δ 6.96 (dd, *J* = 4.0, 1.6 Hz, 1H), 6.79 (t, *J* = 2.0 Hz, 1H), 6.12 (dd, *J* = 4.0, 2.5 Hz, 1H), 3.94 (s, 3H), 2.78 (t, *J* = 7.6 Hz, 2H), 2.17 (tq, *J* = 7.6, 2.6 Hz, 2H), 1.85-1.73 (m, 5H), 1.59-1.50 (m, 2H). **<sup>13</sup>C NMR** (150 MHz, CDCl<sub>3</sub>, TMS): δ 3.5, 18.6, 24.4, 28.7, 37.7, 38.5, 75.7, 78.8, 107.8, 118.9, 130.8, 191.3. **IR** (EtOH): ν 2973, 2915, 2892, 2219, 1672, 1554, 1482, 1325, 1234, 1185, 1032, 757, 699 cm<sup>-1</sup>. **HRMS** (ESI) *m/z*: [M+H]<sup>+</sup> Calcd. for C<sub>13</sub>H<sub>18</sub>ON 204.1383; found 204.1391.

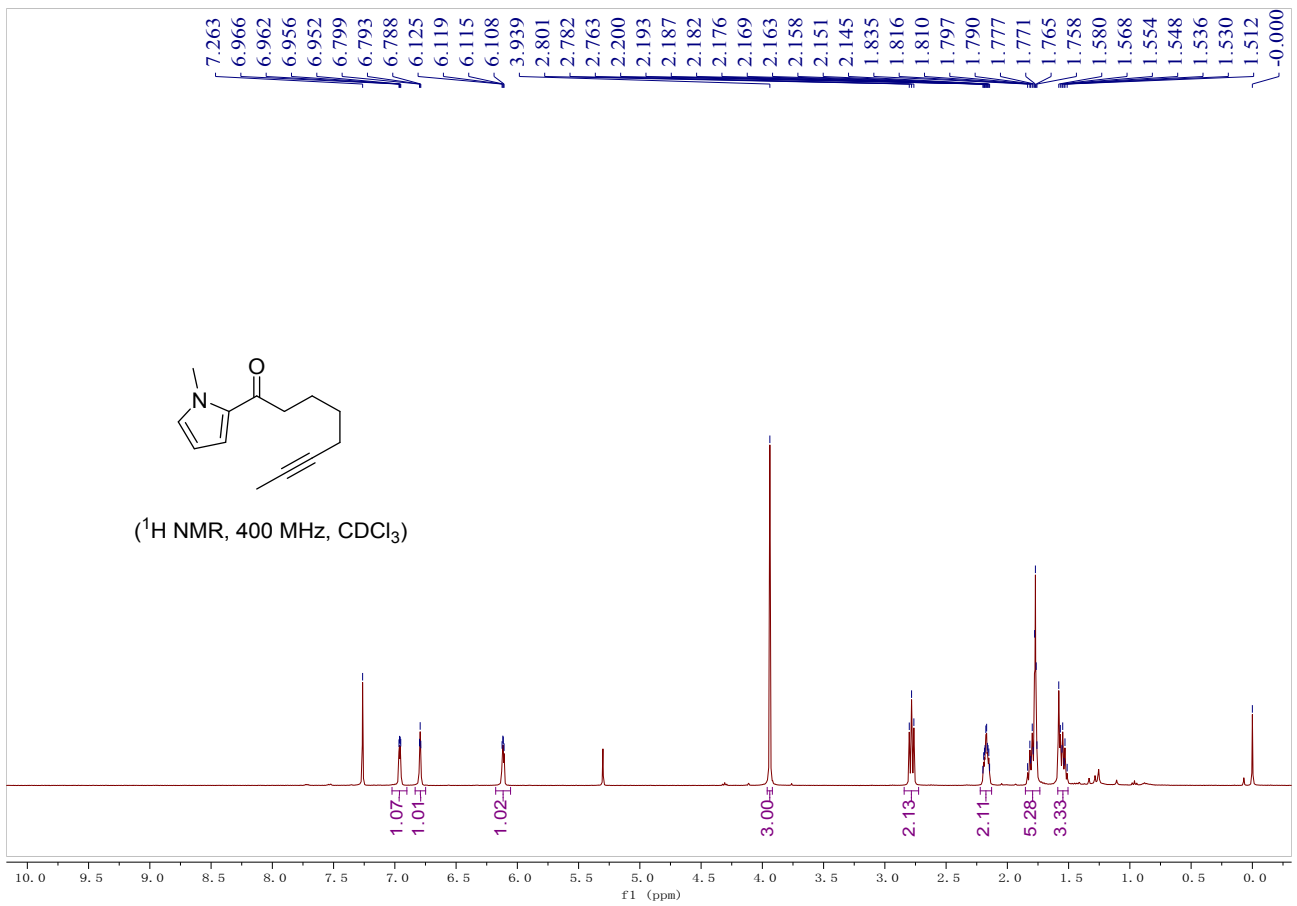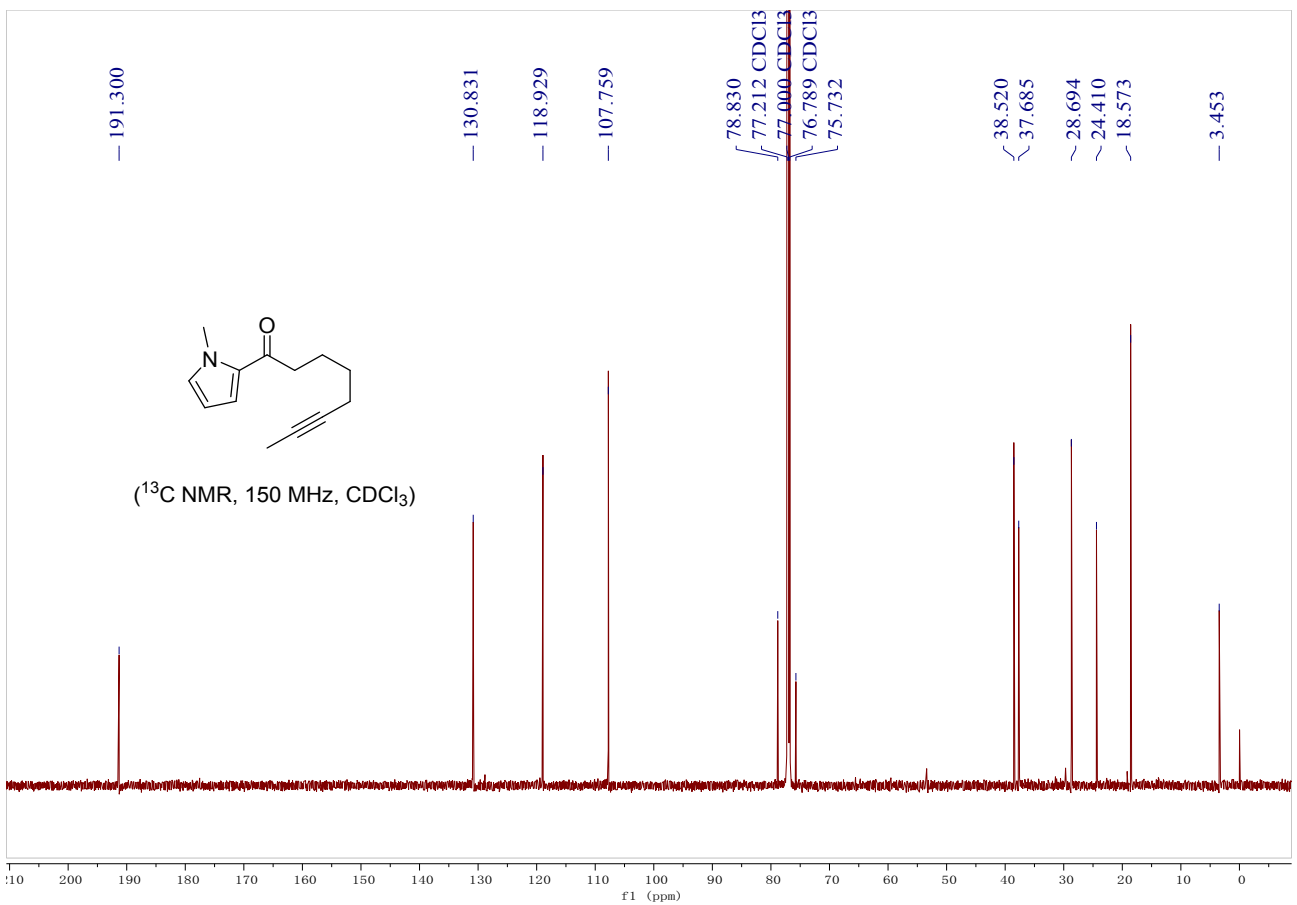

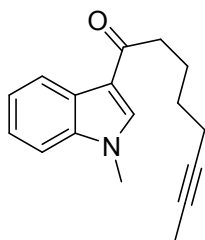

**1-(1-methyl-1*H*-indol-3-yl)oct-6-yn-1-one (3bv)**: colorless oil, 45 mg, 88%, Eluent: PE/EA = 20/1.

**<sup>1</sup>H NMR** (600 MHz, CDCl<sub>3</sub>, TMS): δ 8.41-8.36 (m, 1H), 7.74 (s, 1H), 7.38-7.27 (m, 3H), 3.86 (s, 3H), 2.86 (t, *J* = 7.6 Hz, 2H), 2.20 (tq, *J* = 7.2, 2.6 Hz, 2H), 1.91-1.86 (m, 2H), 1.77 (t, *J* = 2.6 Hz, 3H), 1.63-1.59 (m, 2H). **<sup>13</sup>C NMR** (150 MHz, CDCl<sub>3</sub>, TMS): δ 3.5, 18.6, 24.4, 28.8, 33.5, 39.4, 75.7, 78.9, 109.6, 116.6, 122.5, 122.6, 123.3, 126.3, 135.2, 137.5, 195.6. **IR** (EtOH): ν 2946, 2929, 2220, 1678, 1554, 1449, 1239, 1165, 1002, 851, 757, 690 cm<sup>-1</sup>. **HRMS** (ESI) *m/z*: [M+Na]<sup>+</sup> Calcd. for C<sub>17</sub>H<sub>19</sub>ONNa 276.1359; found 276.1365.

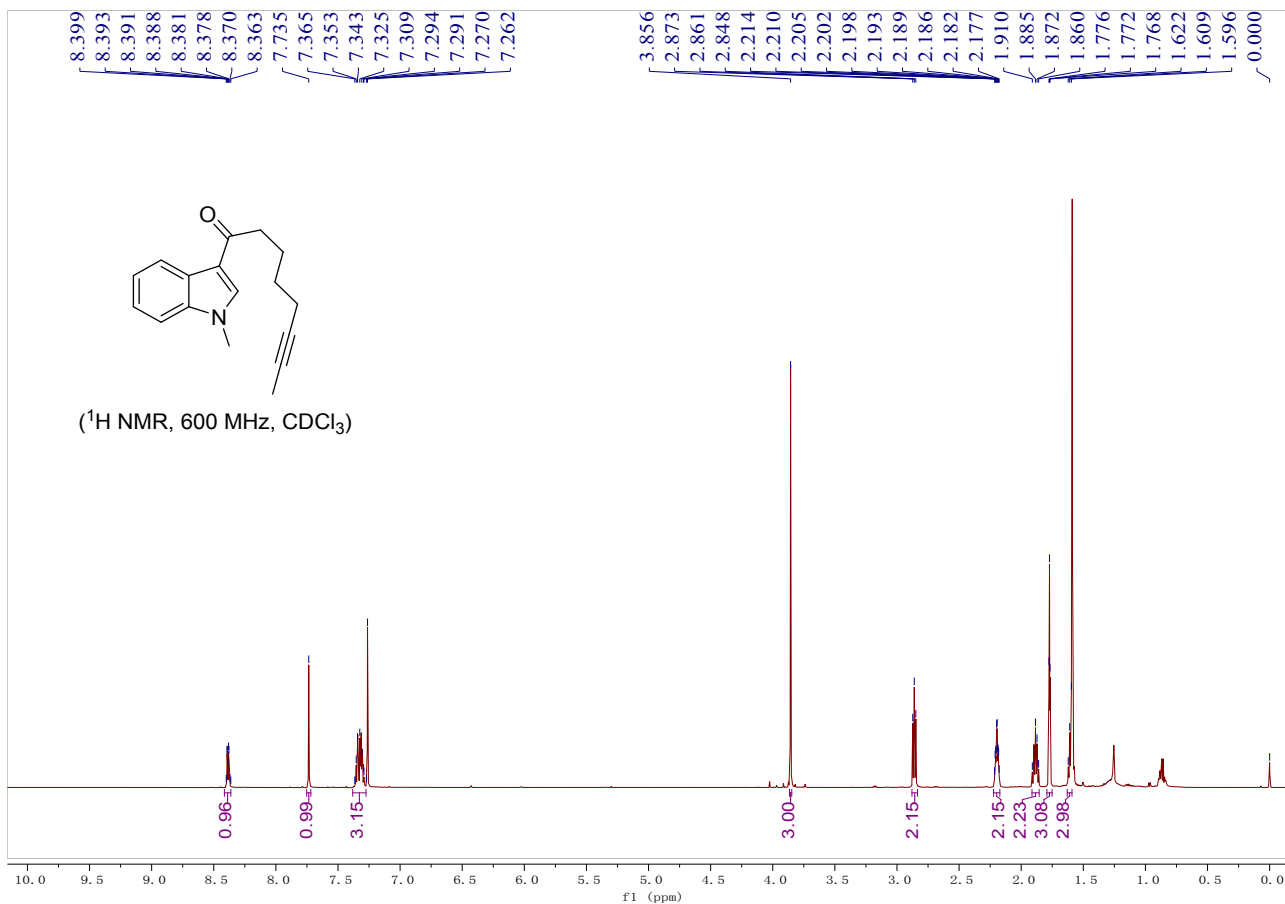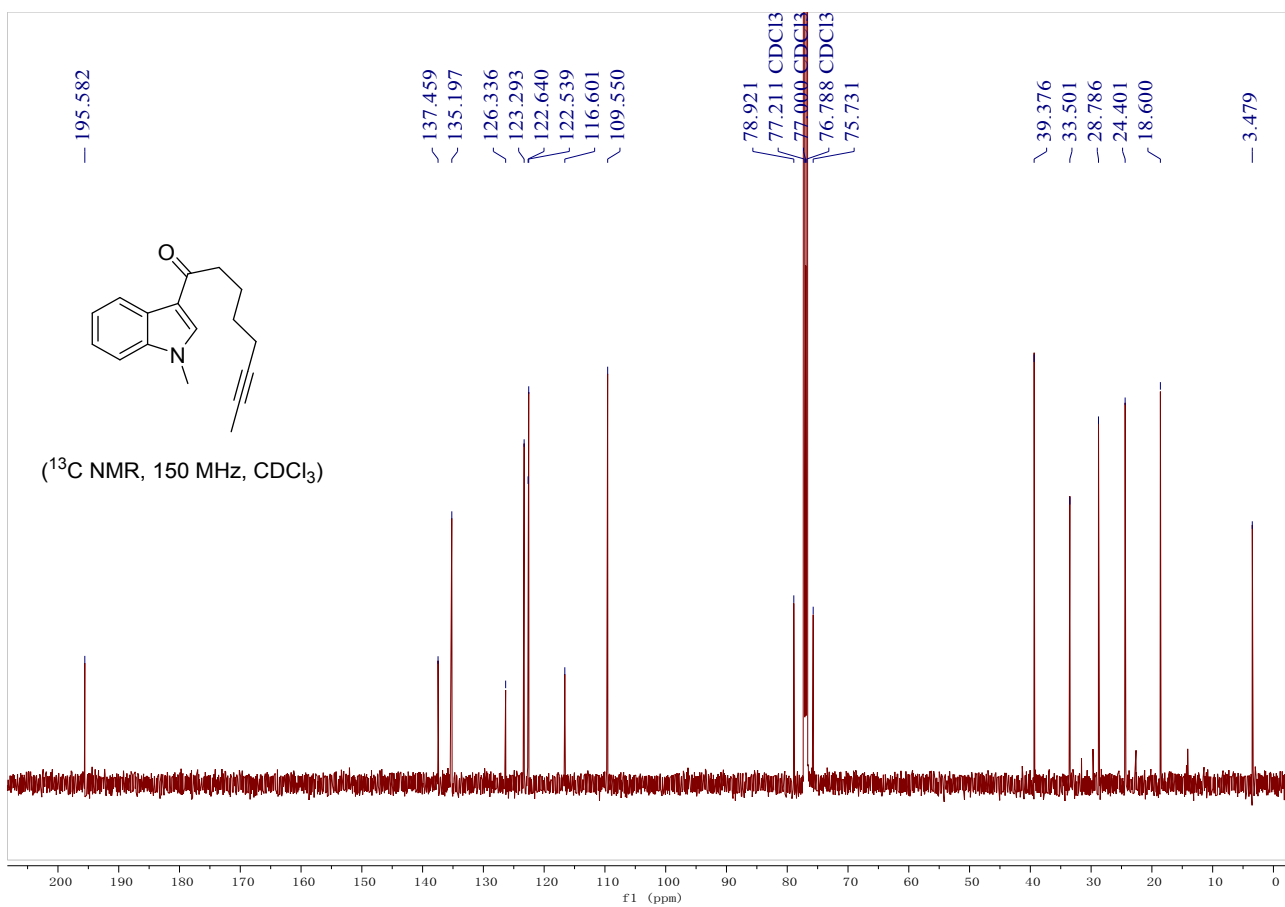

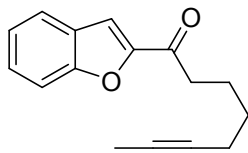

**1-(benzofuran-2-yl)oct-6-yn-1-one (3bw)**: colorless oil, 42 mg, 88%, Eluent: PE/EA = 20/1.

**<sup>1</sup>H NMR** (600 MHz, CDCl<sub>3</sub>, TMS): δ 7.71 (dt, *J* = 8.0, 1.0 Hz, 1H), 7.58 (dd, *J* = 8.4, 1.0 Hz, 1H), 7.51 (d, *J* = 1.0 Hz, 1H), 7.51-7.45 (m, 1H), 7.34-7.28 (m, 1H), 2.99 (t, *J* = 7.2 Hz, 2H), 2.21 (tq, *J* = 7.2, 2.6 Hz, 2H), 1.92-1.86 (m, 2H), 1.77 (t, *J* = 2.6 Hz, 3H), 1.63-1.58 (m, 2H). **<sup>13</sup>C NMR** (150 MHz, CDCl<sub>3</sub>, TMS): δ 3.5, 18.5, 23.4, 28.5, 38.4, 76.0, 78.6, 112.5, 112.6, 123.2, 123.9, 127.1, 128.1, 152.6, 155.6, 191.3. **IR** (EtOH): ν 2940, 2912, 2854, 2215, 1672, 1499, 1321, 1254, 1132, 854, 777, 765, 702, 689 cm<sup>-1</sup>. **HRMS** (ESI) *m/z*: [M+H]<sup>+</sup> Calcd. for C<sub>16</sub>H<sub>17</sub>O<sub>2</sub> 241.1223; found 241.1230.

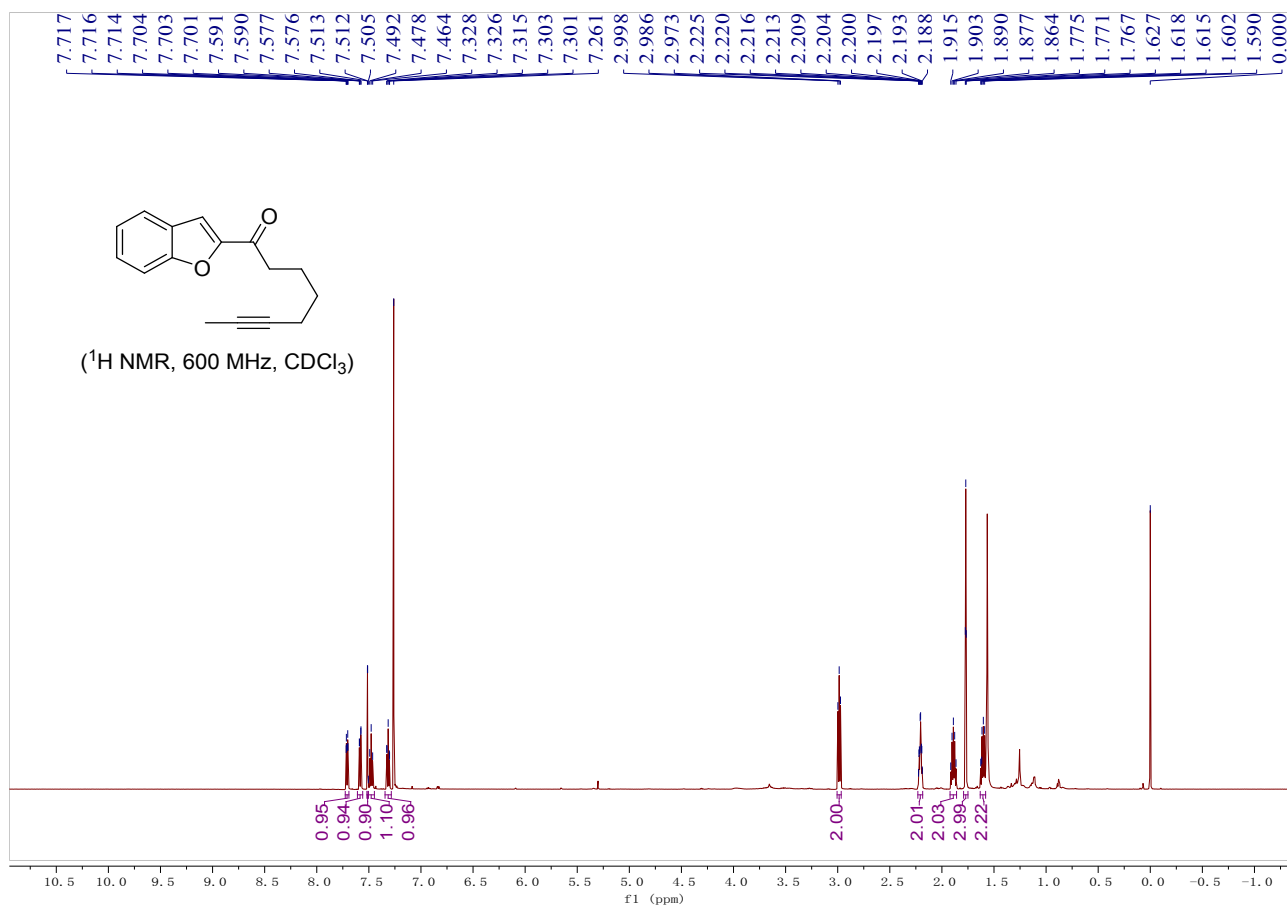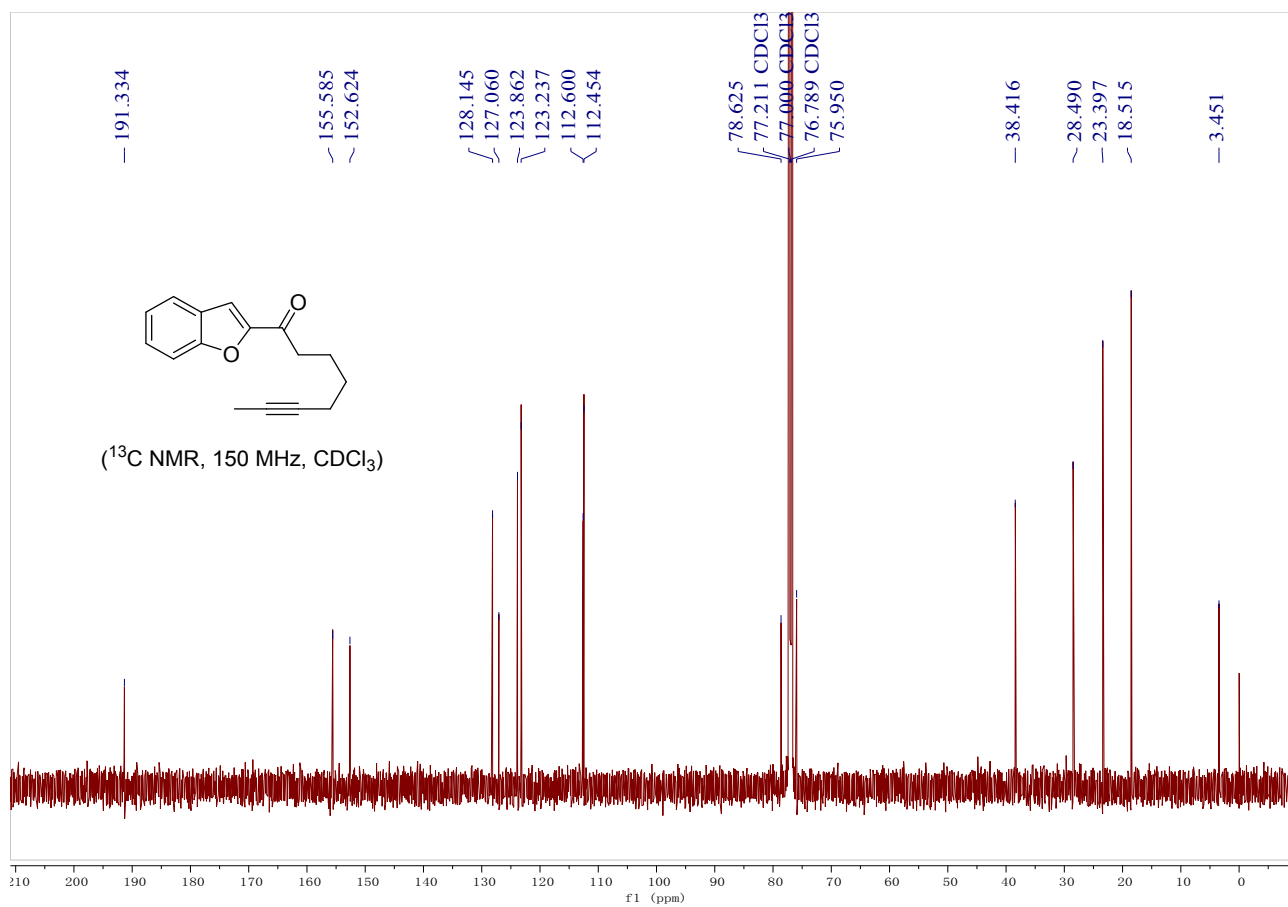

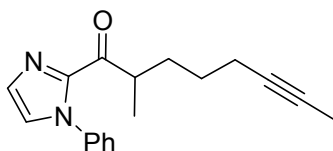

**2-Methyl-1-(1-phenyl-1*H*-imidazol-2-yl)oct-6-yn-1-one (3bx)**: colorless oil, 56 mg, 89%, Eluent: PE/EA = 20/1.

**<sup>1</sup>H NMR** (600 MHz, CDCl<sub>3</sub>, TMS): δ 7.47-7.44 (m, 3H), 7.30-7.23 (m, 4H), 3.92-3.87 (m, 1H), 2.17-2.06 (m, 2H), 1.85-1.78 (m, 1H), 1.74 (t, *J* = 2.6 Hz, 3H), 1.56-1.45 (m, 3H), 1.18 (d, *J* = 6.8 Hz, 3H). **<sup>13</sup>C NMR** (150 MHz, CDCl<sub>3</sub>, TMS): δ 3.4, 17.0, 18.8, 26.8, 32.4, 41.0, 76.8, 78.9, 125.7, 127.1, 128.6, 128.9, 129.5, 138.5, 142.7, 195.2. **IR** (EtOH): ν 2973, 2925, 2872, 2210, 1654, 1534, 1444, 1380, 13028, 1087, 1045, 1009, 851, 767, 700, 653 cm<sup>-1</sup>. **HRMS** (EI) *m/z*: [M]<sup>+</sup> Calcd. for C<sub>18</sub>H<sub>19</sub>ON<sub>2</sub> 279.1492; found 279.1487.



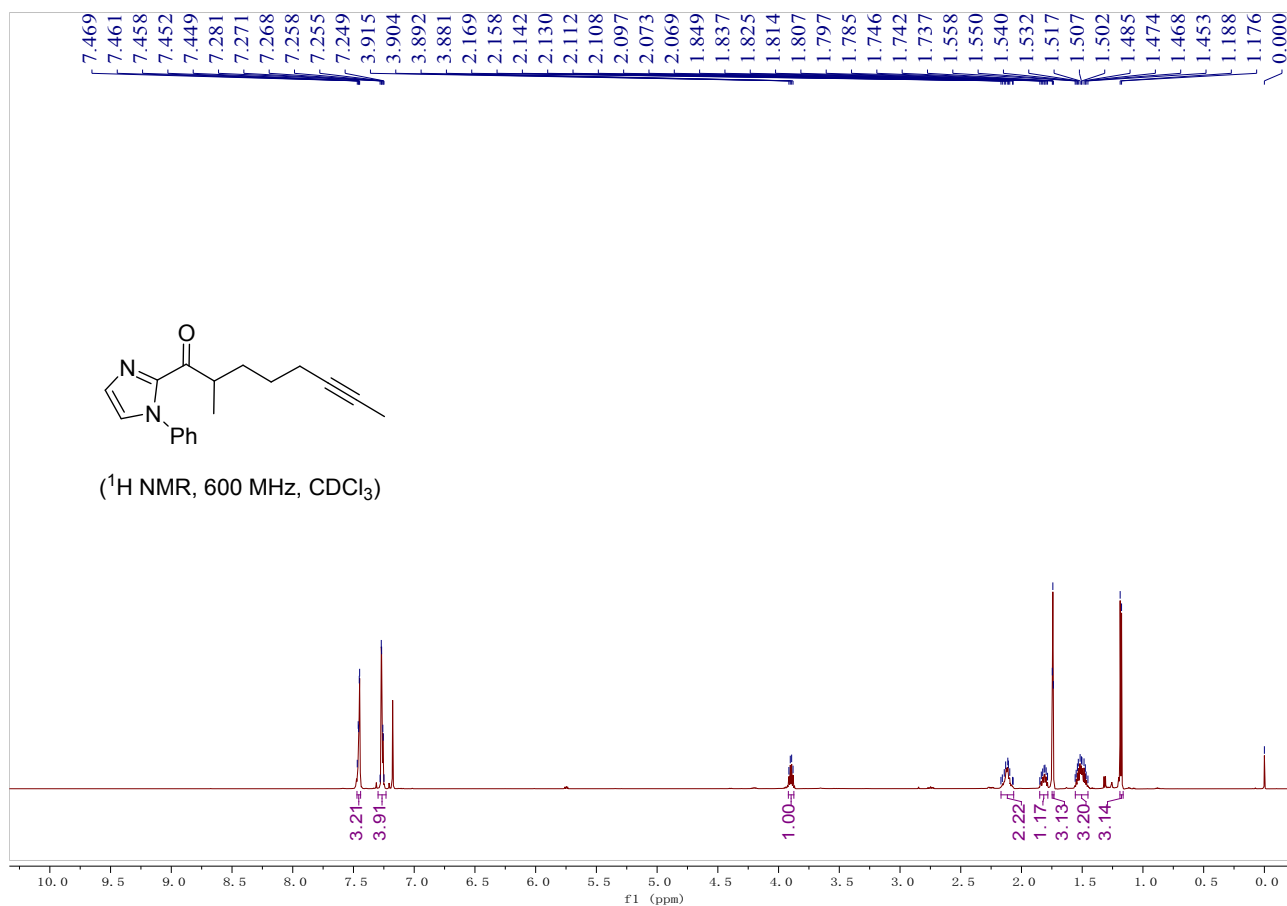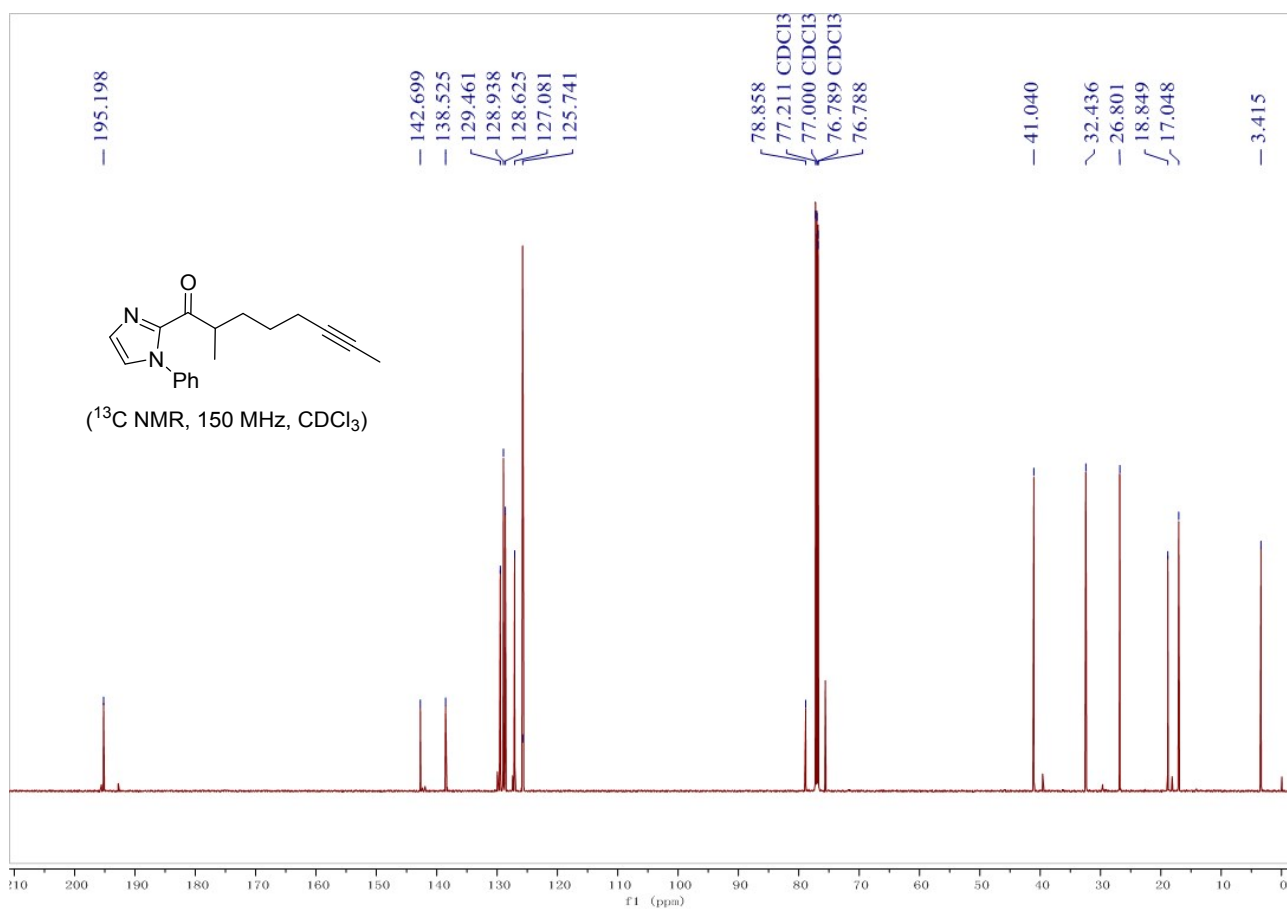

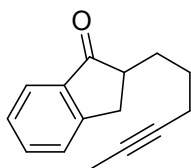

**2-(hex-4-yn-1-yl)-2,3-dihydro-1H-inden-1-one (3by):** colorless oil, 33 mg, 78%, Eluent: PE/EA = 20/1.

**<sup>1</sup>H NMR** (600 MHz, CDCl<sub>3</sub>, TMS): δ 7.76 (d, *J* = 7.6 Hz, 1H), 7.62-7.56 (m, 1H), 7.46 (d, *J* = 7.6 Hz, 1H), 7.40-7.34 (m, 1H), 3.34 (dd, *J* = 17.2, 7.8 Hz, 1H), 2.83 (dd, *J* = 17.2, 4.0 Hz, 1H), 2.68 (tt, *J* = 8.4, 4.2 Hz, 1H), 2.25-2.14 (m, 2H), 2.09-2.00 (m, 1H), 1.77 (t, *J* = 2.4 Hz, 3H), 1.66-1.57 (m, 2H). **<sup>13</sup>C NMR** (150 MHz, CDCl<sub>3</sub>, TMS): δ 3.5, 18.8, 26.9, 30.7, 32.9, 47.1, 75.9, 78.7, 123.9, 126.5, 127.4, 134.7, 136.8, 153.7, 208.7. **IR** (EtOH): ν 2973, 2883, 2210, 1653, 1399, 1087, 1045, 880, 852, 747, 627 cm<sup>-1</sup>. **HRMS** (EI) *m/z*: [M]<sup>+</sup> Calcd. for C<sub>15</sub>H<sub>16</sub>O 212.1196; found 212.1194.

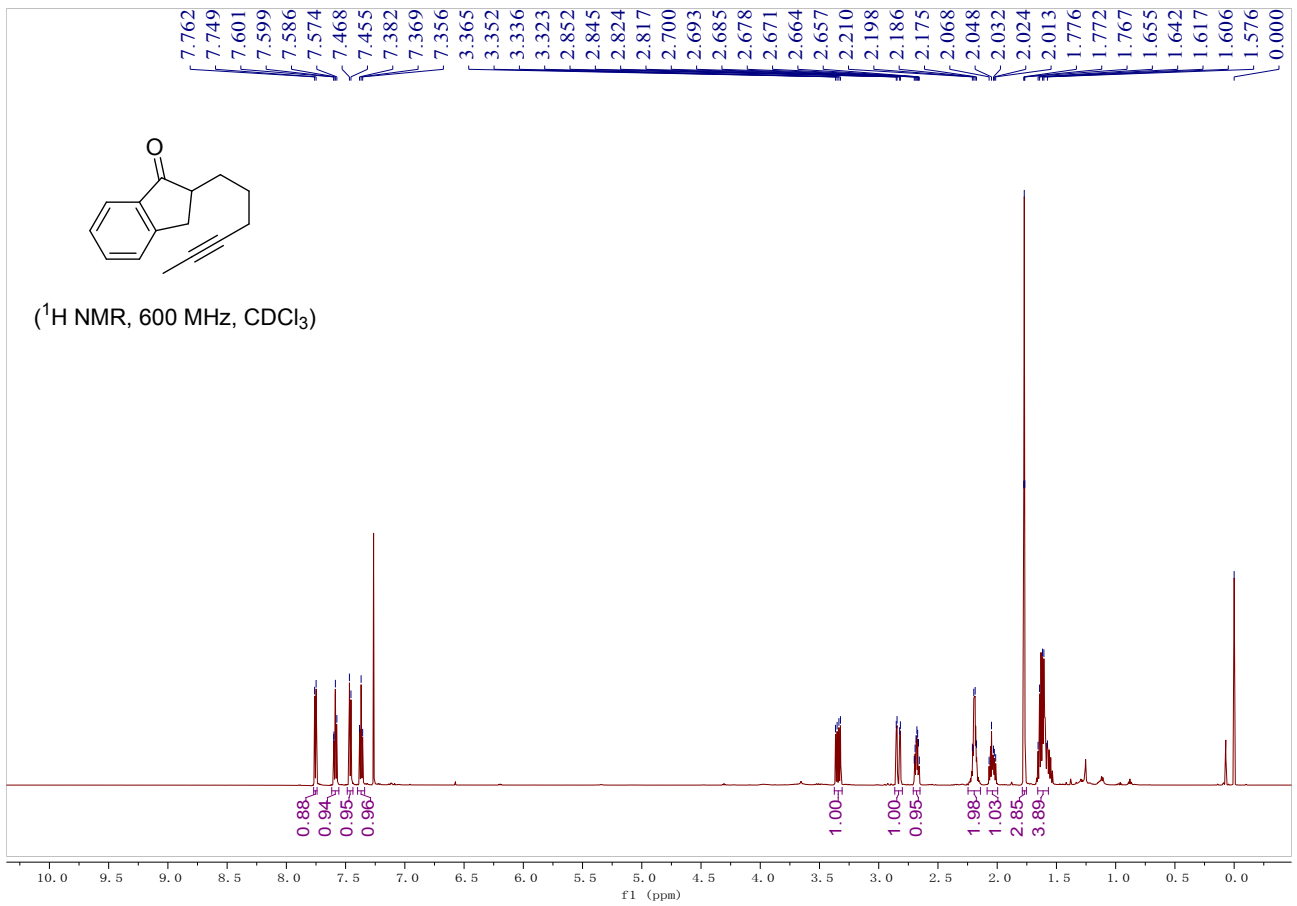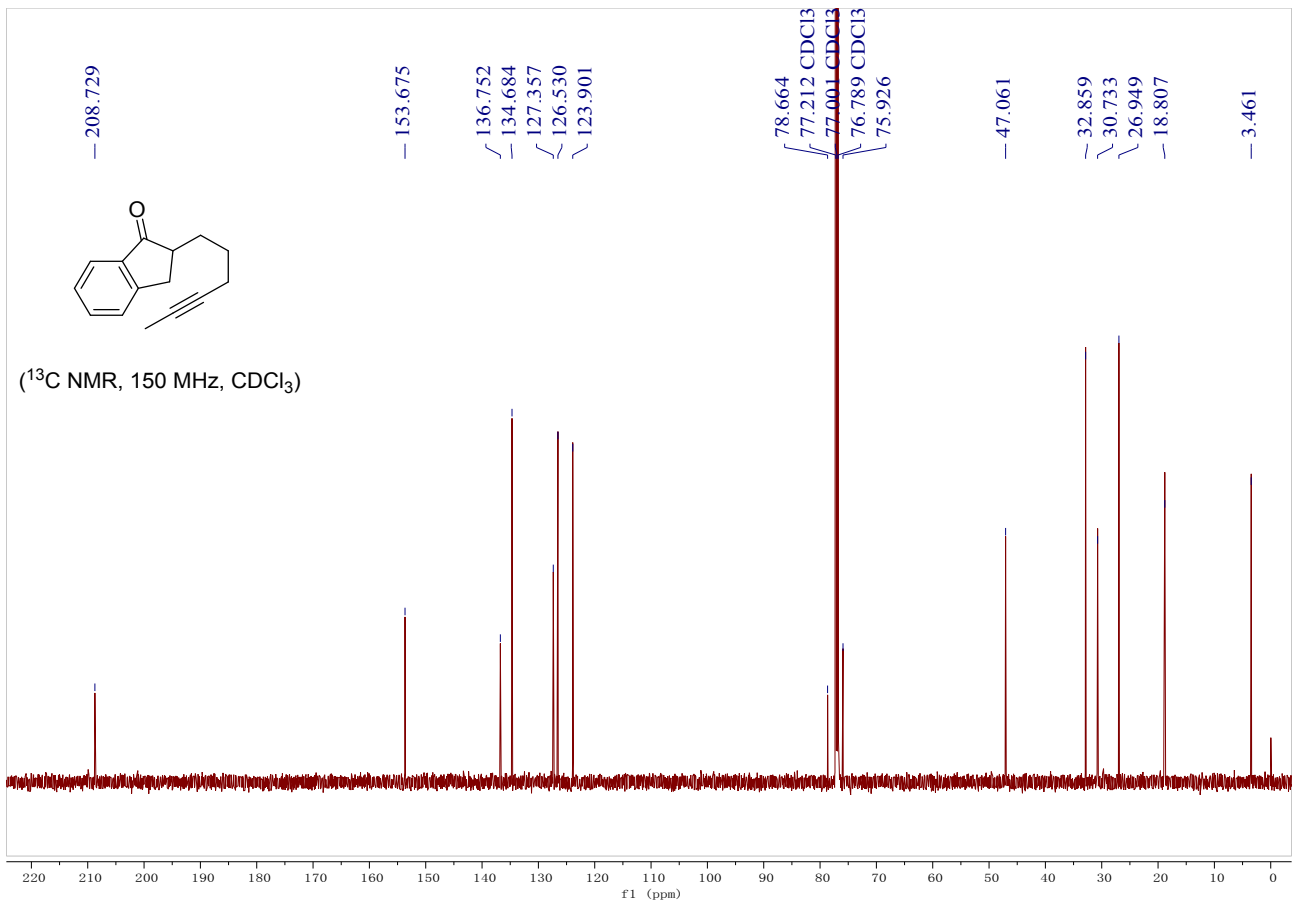

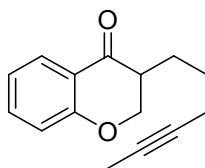

**3-(hex-4-yn-1-yl)chroman-4-one (3bz):** colorless oil, 36 mg, 78%, Eluent: PE/EA = 20/1.

**<sup>1</sup>H NMR** (600 MHz, CDCl<sub>3</sub>, TMS): δ 7.89 (dd, *J* = 7.8, 1.8 Hz, 1H), 7.50-7.42 (m, 1H), 7.02 (t, *J* = 7.6 Hz, 1H), 6.96 (d, *J* = 8.4 Hz, 1H), 4.53 (dd, *J* = 11.4, 4.3 Hz, 1H), 4.32-4.26 (m, 1H), 2.72-2.65 (m, 1H), 2.23-2.15 (m, 2H), 2.01-1.93 (m, 1H), 1.77 (t, *J* = 2.6 Hz, 3H), 1.64-1.60 (m, 3H). **<sup>13</sup>C NMR** (150 MHz, CDCl<sub>3</sub>, TMS): δ 3.4, 18.7, 25.6, 26.4, 45.5, 70.5, 76.1, 78.4, 117.7, 120.6, 121.4, 127.4, 135.7, 161.4, 194.4. **IR** (EtOH): ν 2944, 2935, 2842, 2214, 1682, 1544, 1470, 1355, 1297, 1233, 1154, 1085, 1002, 844, 747, 693, 632 cm<sup>-1</sup>. **HRMS** (ESI) *m/z*: [M+H]<sup>+</sup> Calcd. for C<sub>15</sub>H<sub>17</sub>O<sub>2</sub> 229.1223; found 229.1225.

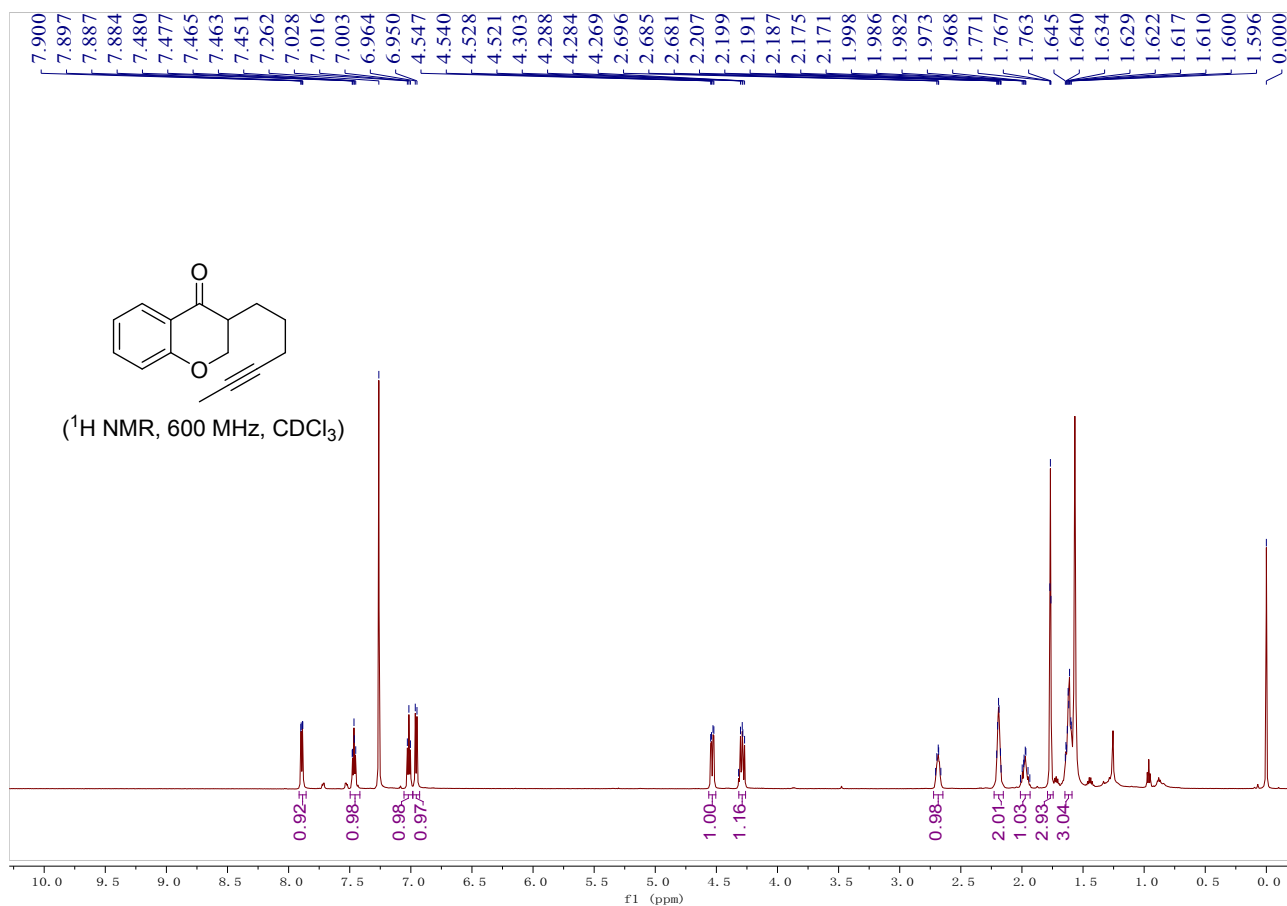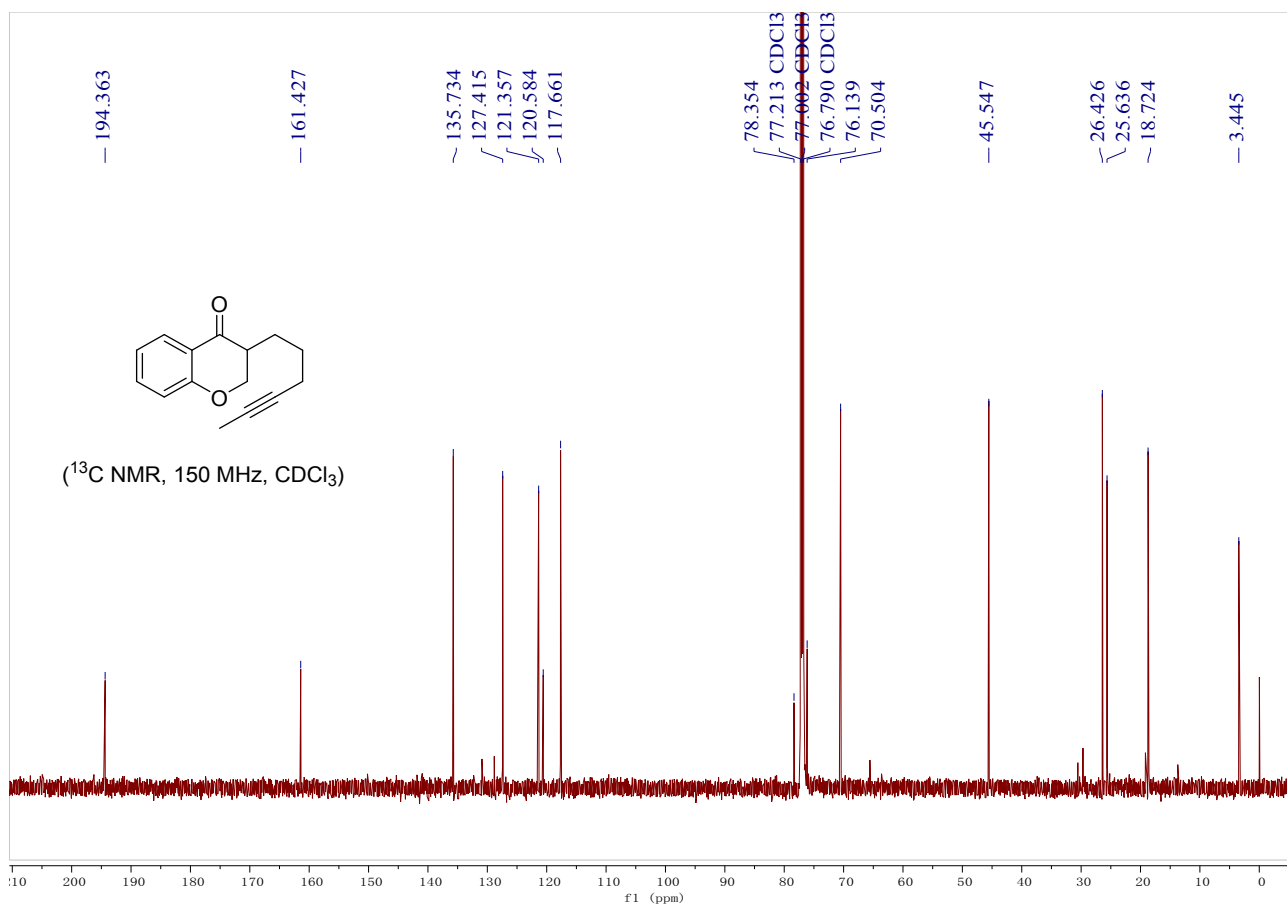

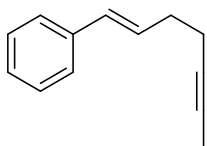

**(E)-Hept-1-en-5-yn-1-ylbenzene (3baa)**: colorless oil, 33 mg, 97%, Eluent: PE/EA = 20/1.

**<sup>1</sup>H NMR** (400 MHz, CDCl<sub>3</sub>, TMS): δ 7.32-7.26 (m, 2H), 7.23 (t, *J* = 7.6 Hz, 2H), 7.16-7.10 (m, 1H), 6.36 (d, *J* = 16.0 Hz, 1H), 6.19 (dt, *J* = 16.0, 6.8 Hz, 1H), 2.38-2.27 (m, 2H), 2.28-2.17 (m, 2H), 1.73 (t, *J* = 2.6 Hz, 3H). **<sup>13</sup>C NMR** (100 MHz, CDCl<sub>3</sub>, TMS): δ 3.5, 19.0, 32.6, 76.1, 78.5, 126.0, 127.0, 128.5, 129.1, 130.7, 137.6. **IR** (EtOH): ν 2958, 2928, 2870, 2215, 1650, 1586, 1452, 1215, 1166, 914, 872, 780, 701 cm<sup>-1</sup>. **HRMS** (ESI) *m/z*: [M+H]<sup>+</sup> Calcd. for C<sub>13</sub>H<sub>15</sub> 171.1168; found 171.1170.

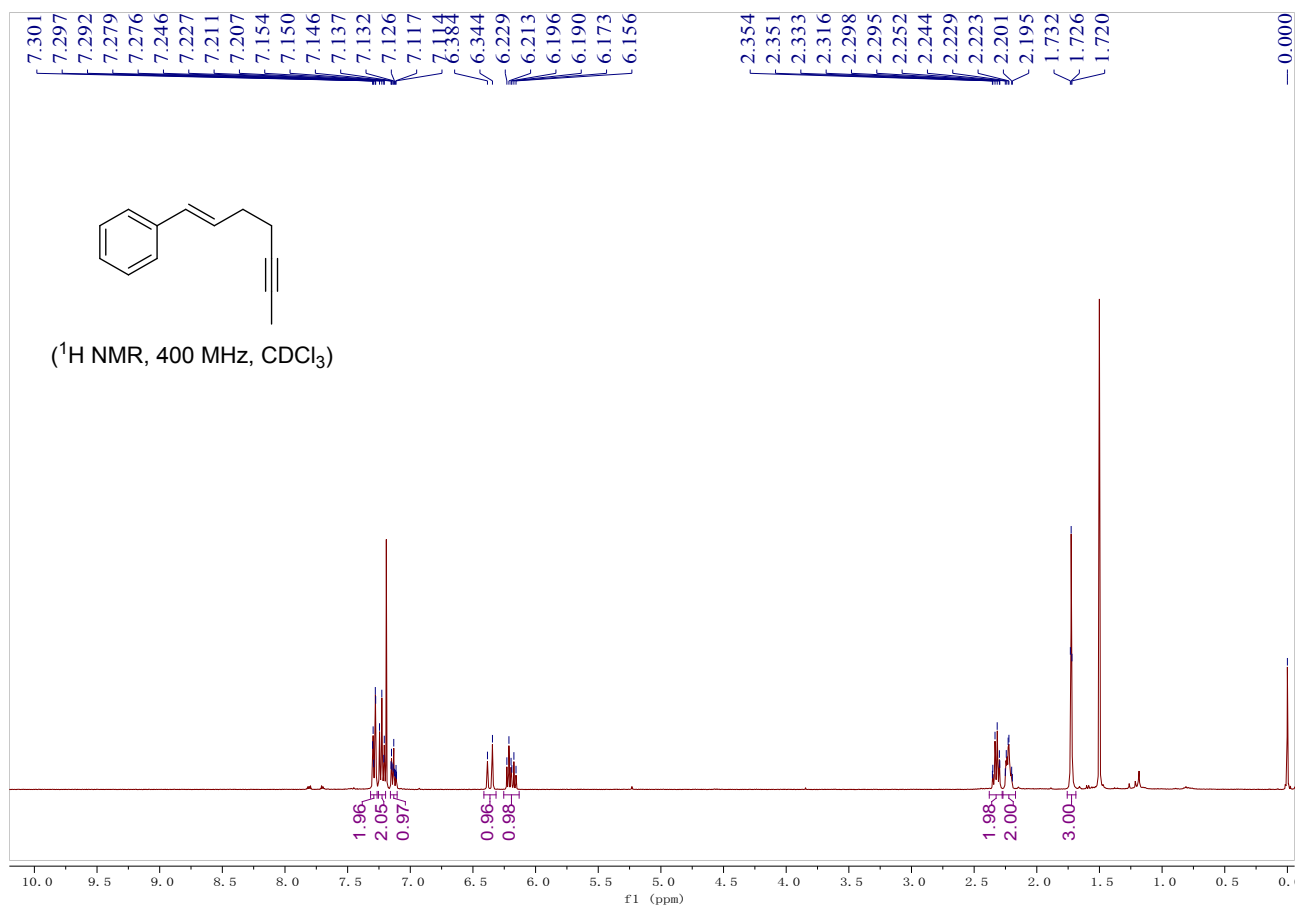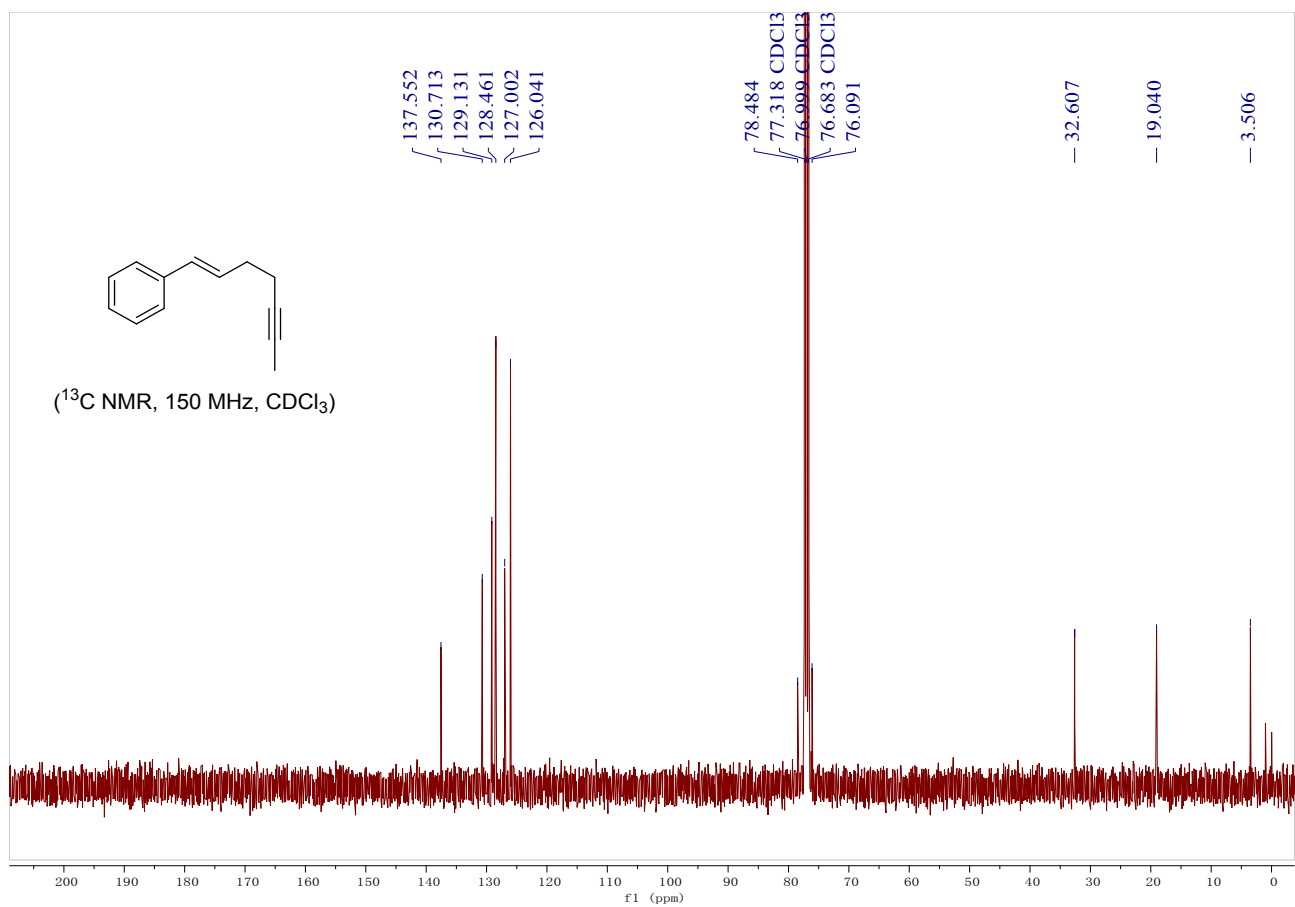

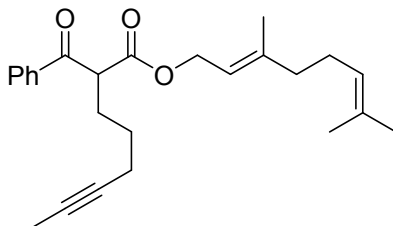

**(E)-3,7-Dimethylocta-2,6-dien-1-yl 2-benzoyloct-6-ynoate (3bab):** colorless oil, 67 mg, 88%,  
 Eluent: PE/EA = 20/1.

**<sup>1</sup>H NMR** (600 MHz, CDCl<sub>3</sub>, TMS): δ 8.02-7.97 (m, 2H), 7.58 (t, *J* = 7.4 Hz, 1H), 7.50-7.44 (m, 2H), 5.23 (td, *J* = 7.2, 1.4 Hz, 1H), 5.05 (tt, *J* = 6.8, 1.4 Hz, 1H), 4.60 (dd, *J* = 7.2, 3.4 Hz, 2H), 4.33 (t, *J* = 7.2 Hz, 1H), 2.18 (tq, *J* = 7.2, 2.4 Hz, 2H), 2.14-2.07 (m, 2H), 2.05-2.01 (m, 2H), 1.99-1.95 (m, 2H), 1.74 (t, *J* = 2.4 Hz, 3H), 1.67 (s, 3H), 1.61 (s, 3H), 1.57-1.53 (m, 2H). **<sup>13</sup>C NMR** (150 MHz, CDCl<sub>3</sub>, TMS): δ 3.4, 16.4, 17.7, 18.5, 25.6, 26.2, 26.8, 28.1, 39.4, 53.9, 62.2, 76.2, 78.3, 117.7, 123.7, 128.7, 131.8, 133.4, 136.2, 143.0, 169.9, 194.9. **IR** (EtOH): ν 3002, 2975, 2935, 2882, 2220, 1682, 1648, 1599, 1544, 1482, 1382, 1327, 1086, 1044, 1009, 879, 737, 634 cm<sup>-1</sup>. **HRMS** (ESI) *m/z*: [M+Na]<sup>+</sup> Calcd. for C<sub>25</sub>H<sub>32</sub>O<sub>3</sub>Na 403.2244; found 403.2250.



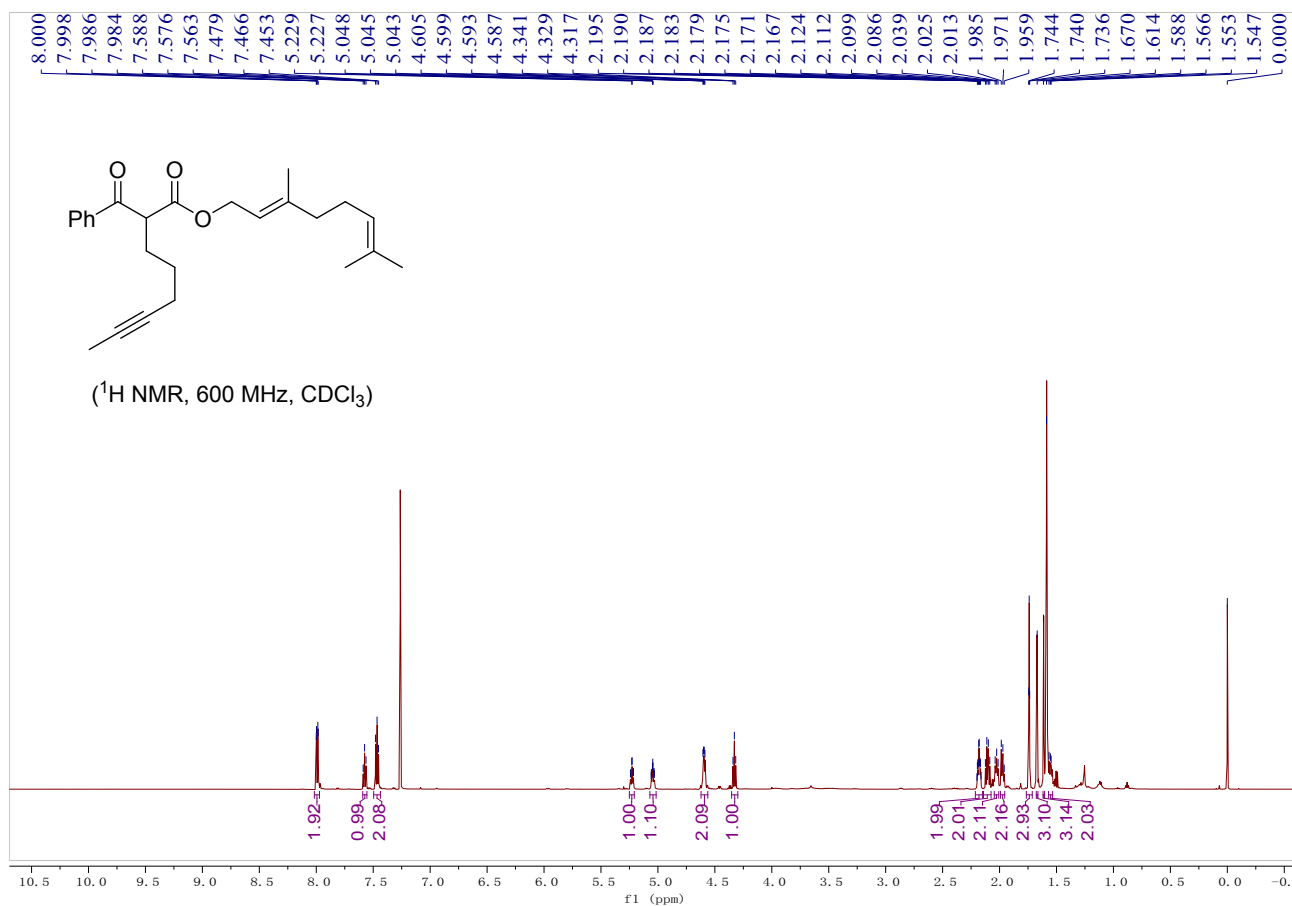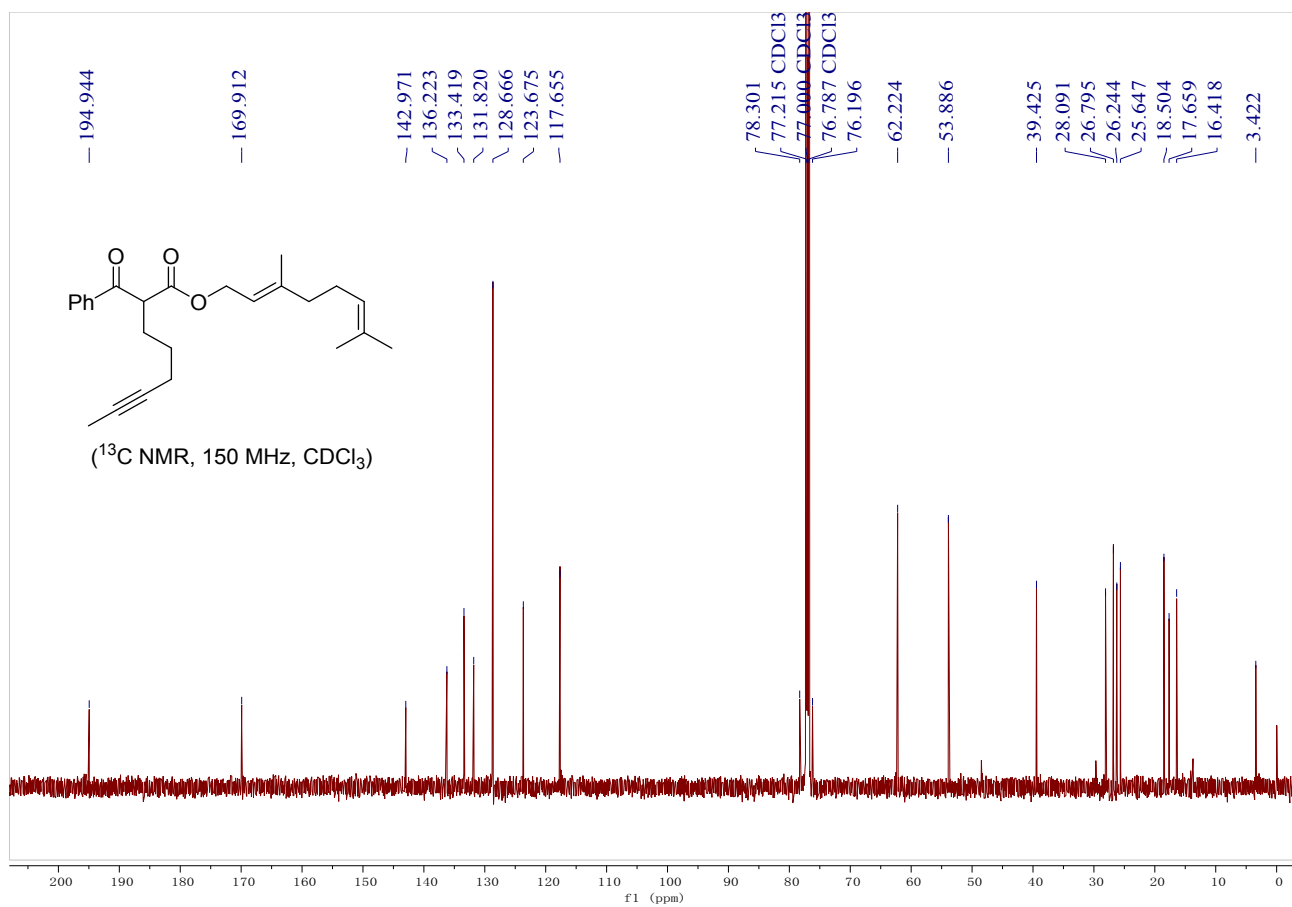

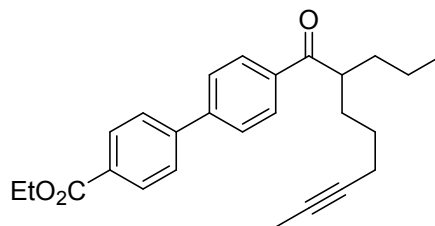

**Ethyl 4'-(2-propyloct-6-ynoyl)-[1,1'-biphenyl]-4-carboxylate (3bac):** colorless oil, 78 mg, 83%,  
Eluent: PE/EA = 20/1.

**<sup>1</sup>H NMR** (400 MHz, CDCl<sub>3</sub>, TMS): δ 8.15 (d, *J* = 8.4 Hz, 2H), 8.06 (d, *J* = 8.4 Hz, 2H), 7.76-7.66 (m, 4H), 4.42 (q, *J* = 7.2 Hz, 2H), 3.50 (tt, *J* = 7.8, 5.4 Hz, 1H), 2.17-2.06 (m, 2H), 1.92-1.73 (m, 5H), 1.67-1.59 (m, 2H), 1.54-1.40 (m, 6H), 1.35-1.28 (m, 2H), 0.90 (t, *J* = 7.2 Hz, 3H). **<sup>13</sup>C NMR** (150 MHz, CDCl<sub>3</sub>, TMS): δ 3.4, 14.26, 14.34, 18.8, 20.8, 26.9, 31.5, 34.7, 45.5, 61.1, 75.9, 78.7, 127.2, 127.5, 128.9, 130.2, 136.9, 144.1, 144.3, 166.3, 203.9. **IR** (EtOH): ν 2977, 2898, 2219, 1683, 1644, 1531, 1476, 1382, 1352, 1223, 1086, 1044, 878, 777, 682 cm<sup>-1</sup>. **HRMS** (ESI) *m/z*: [M+Na]<sup>+</sup> Calcd. for C<sub>26</sub>H<sub>30</sub>O<sub>3</sub>Na 413.2087; found 413.2094.

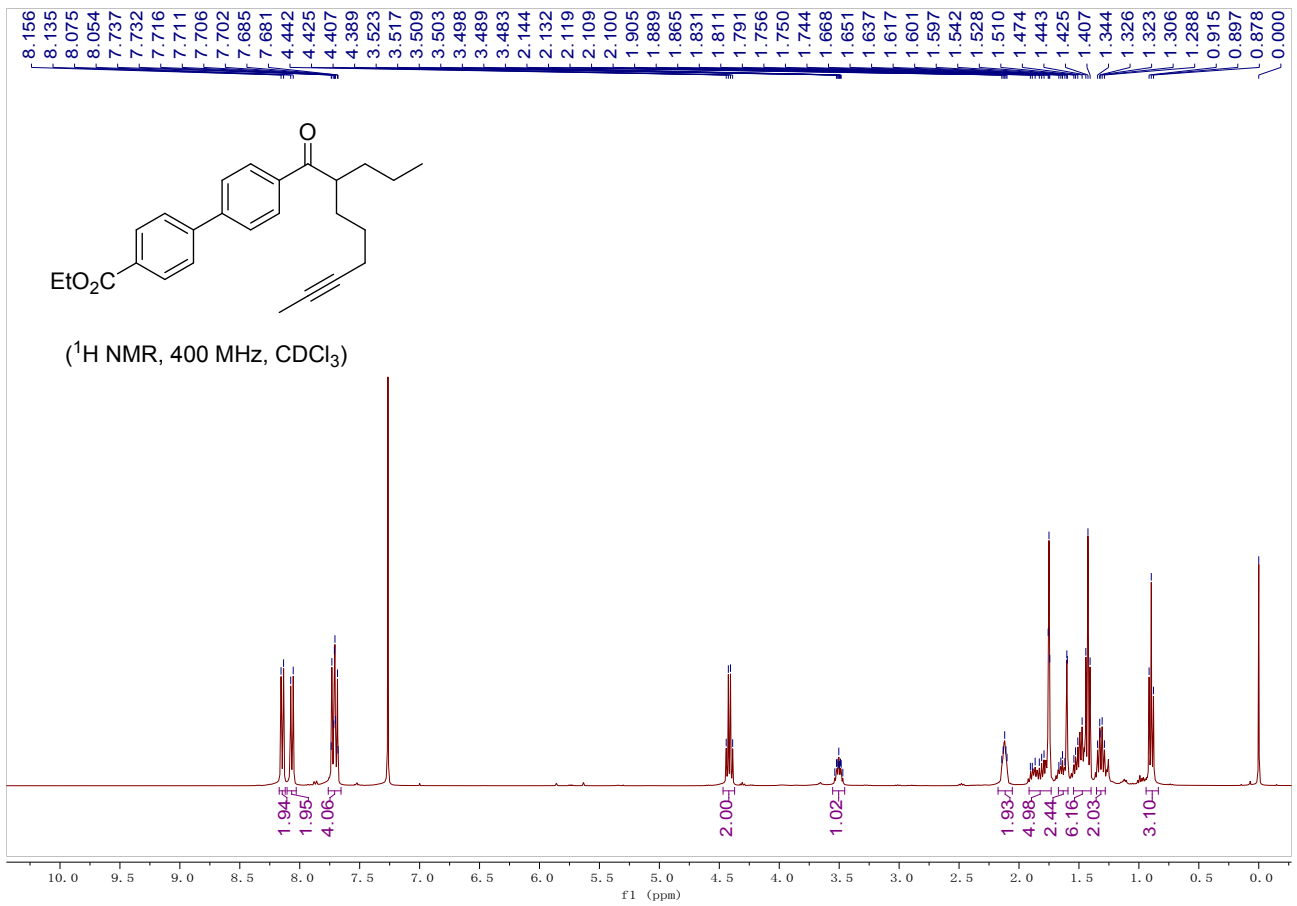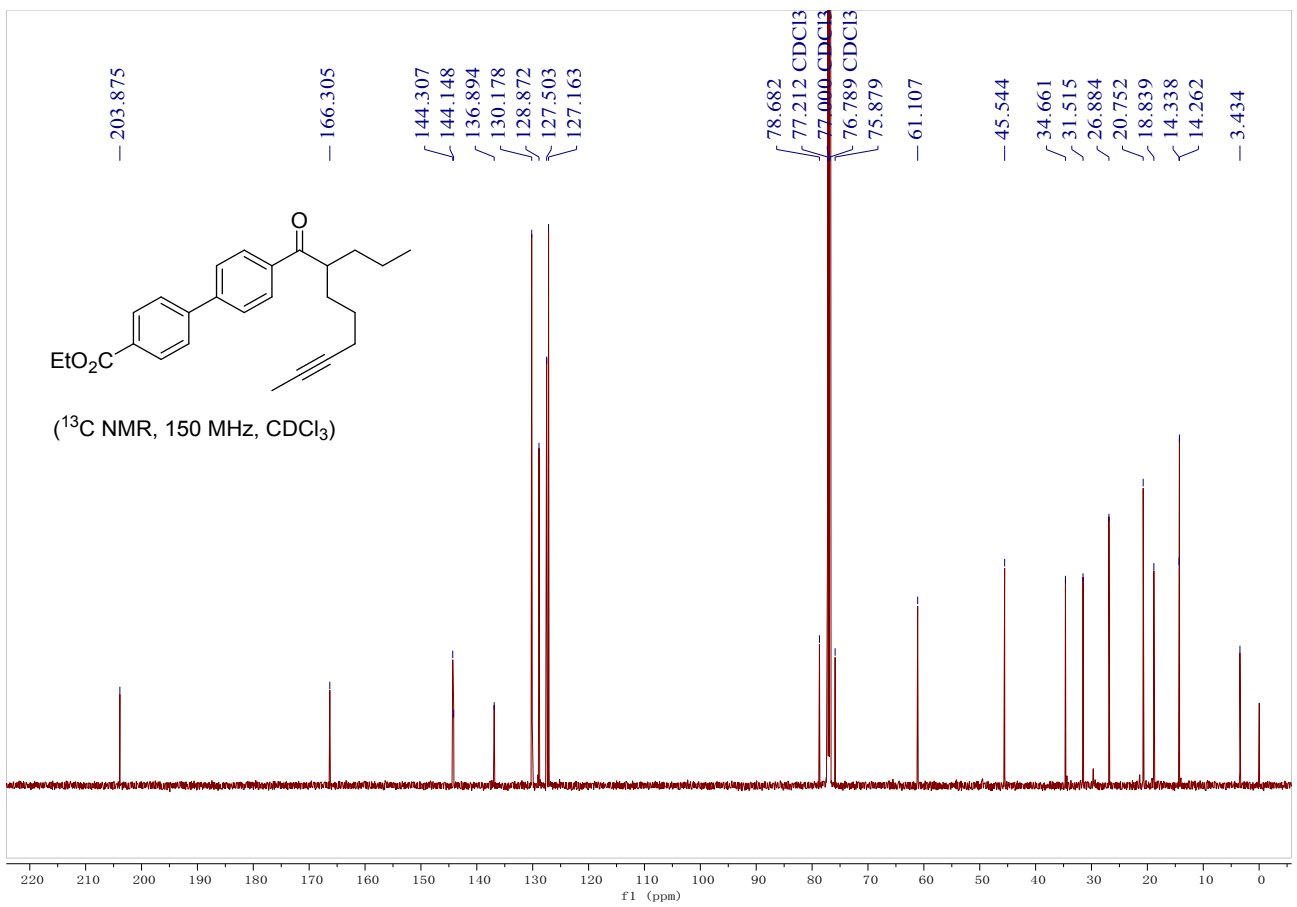

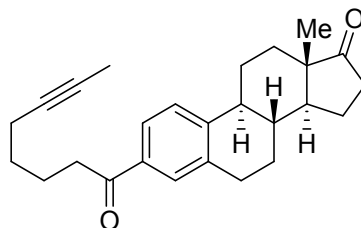

**(8*R*,9*S*,13*S*,14*S*)-13-methyl-3-(oct-6-ynoyl)-6,7,8,9,11,12,13,14,15,16-decahydro-17*H*-cyclopenta[*a*]phenanthren-17-one (3bad):** colorless solid, m.p. 226-228 °C, 59 mg, 78%, Eluent: PE/EA = 20/1.

**<sup>1</sup>H NMR** (400 MHz, CDCl<sub>3</sub>, TMS): δ 7.77-7.69 (m, 2H), 7.38 (d, *J* = 8.2 Hz, 1H), 3.03-2.92 (m, 4H), 2.56-2.44 (m, 2H), 2.38-2.30 (m, 1H), 2.24-2.14 (m, 3H), 2.12-1.96 (m, 4H), 1.87-1.76 (m, 5H), 1.71-1.44 (m, 7H), 0.92 (s, 3H). **<sup>13</sup>C NMR** (150 MHz, CDCl<sub>3</sub>, TMS): δ 3.5, 13.8, 18.6, 21.6, 23.6, 25.6, 26.3, 28.6, 29.3, 31.5, 35.8, 37.8, 38.0, 44.7, 47.9, 50.5, 75.8, 78.8, 125.5, 128.7, 134.7, 136.9, 145.2, 200.1, 220.6. **IR** (EtOH): ν 2938, 2928, 2856, 2231, 1684, 1584, 1486, 1459, 1430, 1283, 1256, 1168, 1044, 867, 785, 686 cm<sup>-1</sup>. **HRMS** (ESI) *m/z*: [M+Na]<sup>+</sup> Calcd. for C<sub>26</sub>H<sub>32</sub>O<sub>2</sub>Na 399.2295; found 399.2301.

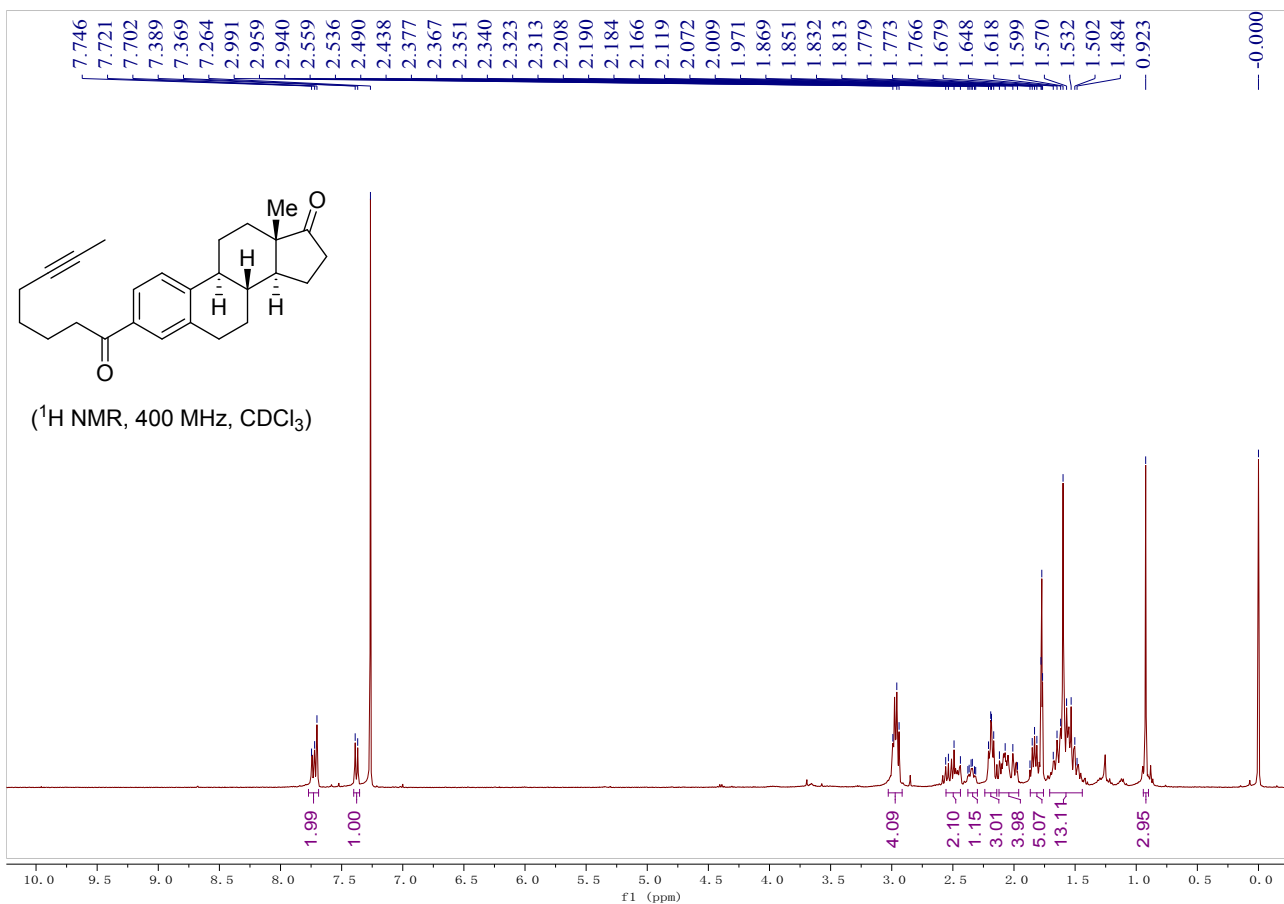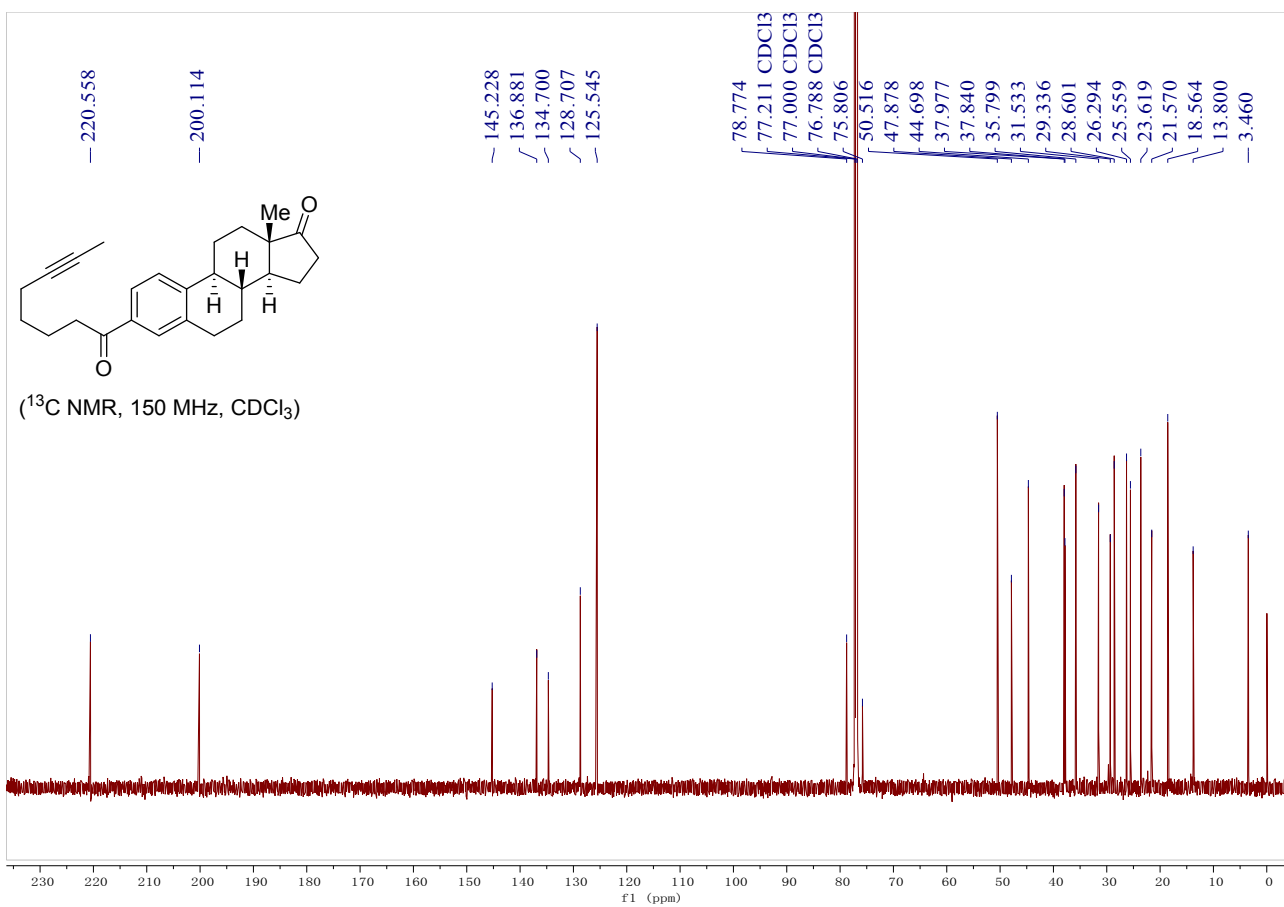

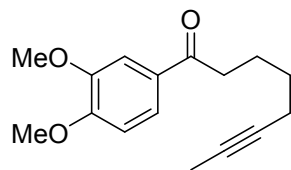

**1-(3,4-dimethoxyphenyl)oct-6-yn-1-one (3bae):** colorless oil, 46 mg, 88%, Eluent: PE/EA = 20/1. **<sup>1</sup>H NMR** (400 MHz, CDCl<sub>3</sub>, TMS): δ 7.62-7.52 (m, 2H), 6.89 (d, *J* = 8.4 Hz, 1H), 3.95 (s, 6H), 2.95 (t, *J* = 7.4 Hz, 2H), 2.19 (tq, *J* = 7.2, 2.6 Hz, 2H), 1.88-1.79 (m, 2H), 1.77 (t, *J* = 2.6 Hz, 3H), 1.60-1.54 (m, 2H). **<sup>13</sup>C NMR** (100 MHz, CDCl<sub>3</sub>, TMS): δ 3.5, 18.6, 23.8, 28.6, 37.6, 55.95, 56.04, 75.8, 78.8, 109.9, 110.1, 122.7, 130.2, 149.0, 153.1, 198.9. **IR** (EtOH): ν 2973, 2875, 2200, 1677, 1591, 1514, 1416, 1266, 1086, 1045, 1001, 879, 765, 623 cm<sup>-1</sup>. **HRMS** (EI) *m/z*: [M]<sup>+</sup> Calcd. for C<sub>16</sub>H<sub>30</sub>O<sub>3</sub> 260.1407; found 260.1401.

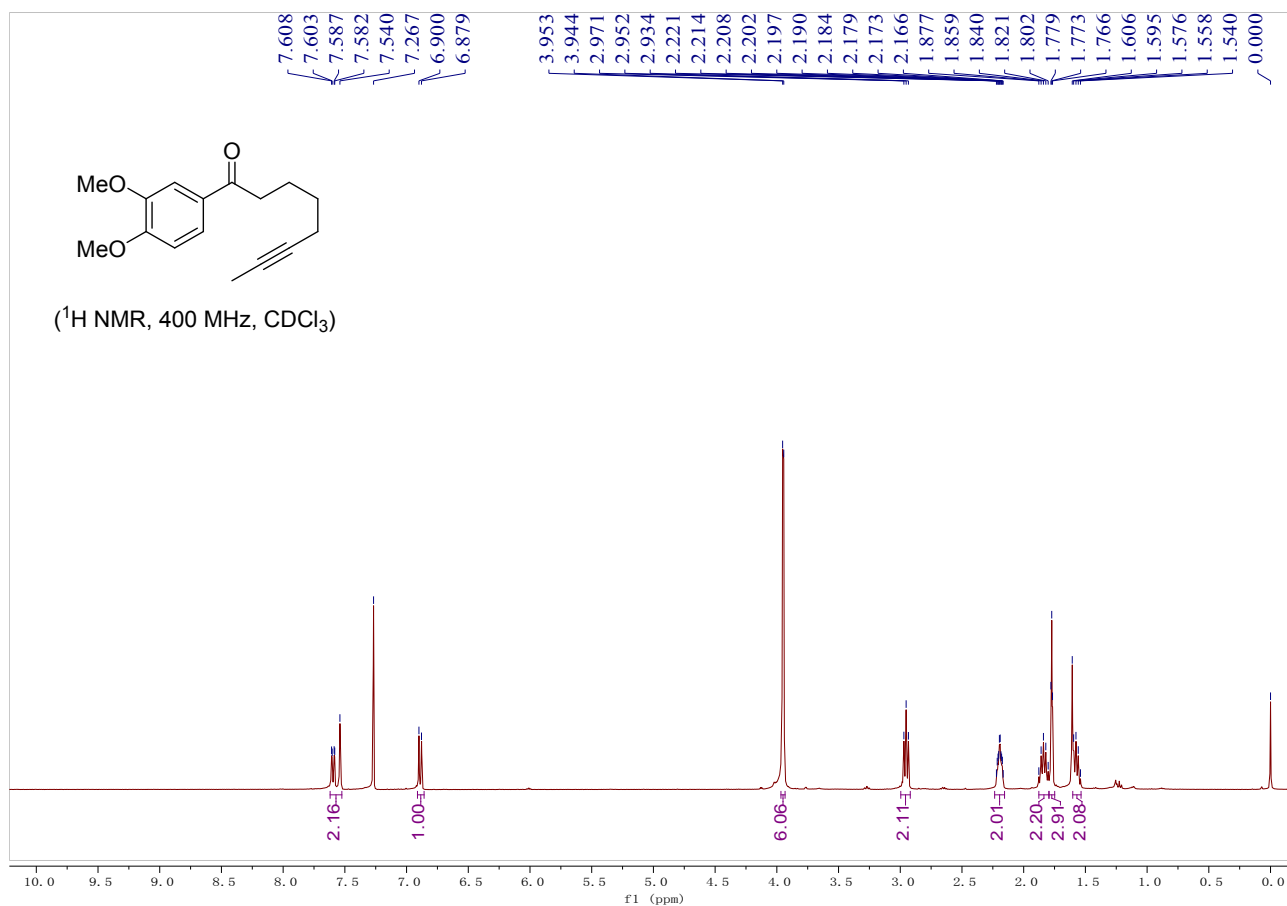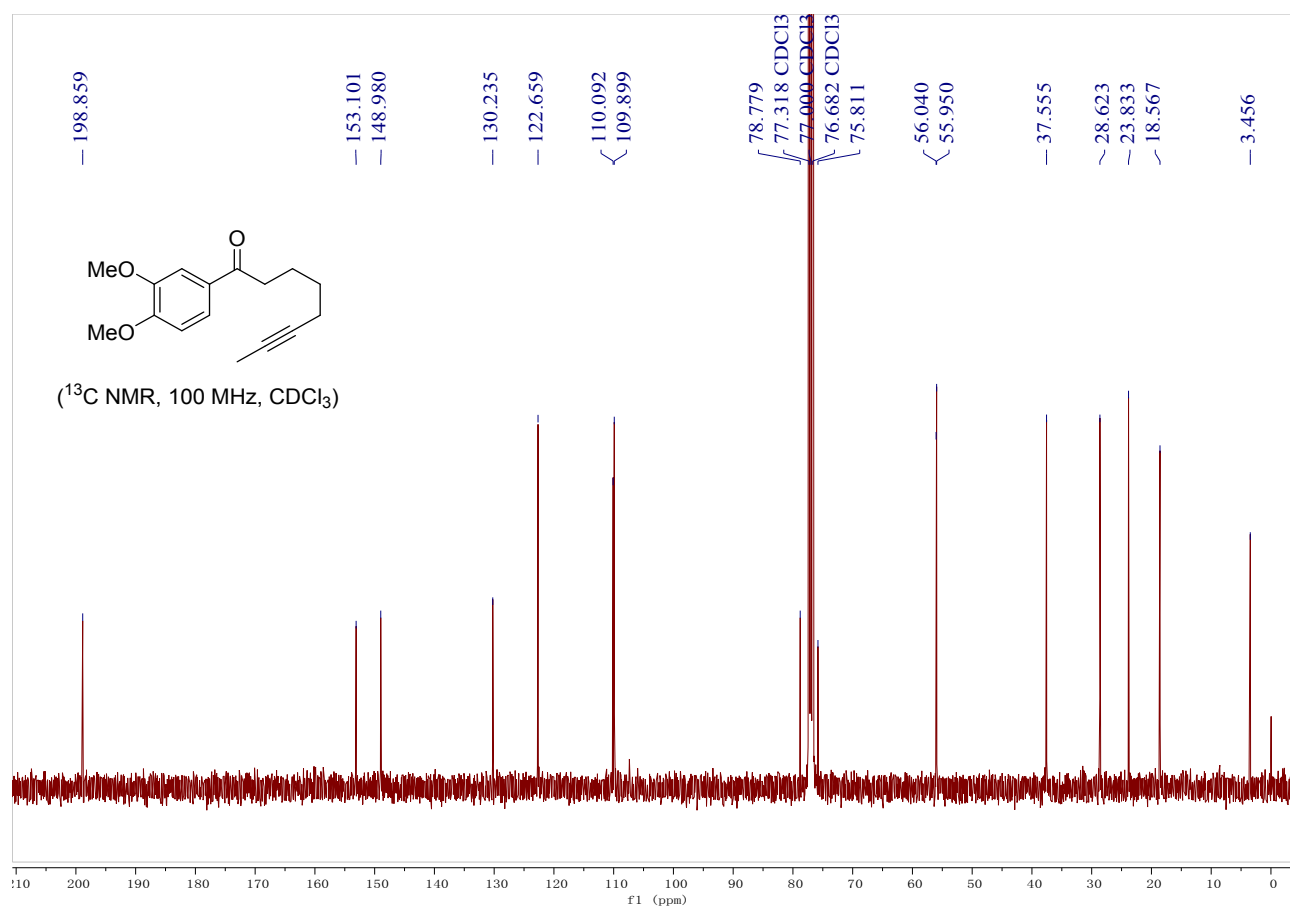

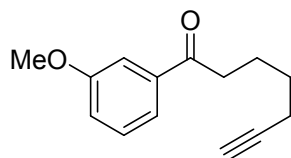

**1-(3-methoxyphenyl)hept-6-yn-1-one (3baf):** colorless oil, 149 mg, 69%, Eluent: PE/EA = 20/1. **<sup>1</sup>H NMR** (600 MHz, CDCl<sub>3</sub>, TMS): δ 7.54 (dt, *J* = 7.6, 1.2 Hz, 1H), 7.49 (dd, *J* = 2.6, 1.6 Hz, 1H), 7.37 (t, *J* = 8.0 Hz, 1H), 7.11 (dd, *J* = 8.2, 2.6 Hz, 1H), 3.86 (s, 3H), 2.99 (t, *J* = 7.2 Hz, 2H), 2.26 (td, *J* = 7.2, 2.8 Hz, 2H), 1.96 (t, *J* = 2.6 Hz, 1H), 1.90-1.84 (m, 2H), 1.67-1.60 (m, 2H). **<sup>13</sup>C NMR** (150 MHz, CDCl<sub>3</sub>, TMS): δ 18.3, 23.4, 28.0, 38.0, 55.4, 68.6, 84.1, 112.3, 119.4, 120.7, 129.6, 138.3, 159.8, 199.8. **IR** (EtOH): ν 3291, 2940, 2837, 2115, 1680, 1583, 1455, 1429, 1254, 1166, 1043, 870, 781, 749, 683, 631 cm<sup>-1</sup>. **HRMS** (EI) *m/z*: [M]<sup>+</sup> Calcd. for C<sub>14</sub>H<sub>16</sub>O<sub>2</sub> 216.1145; found 216.1144.



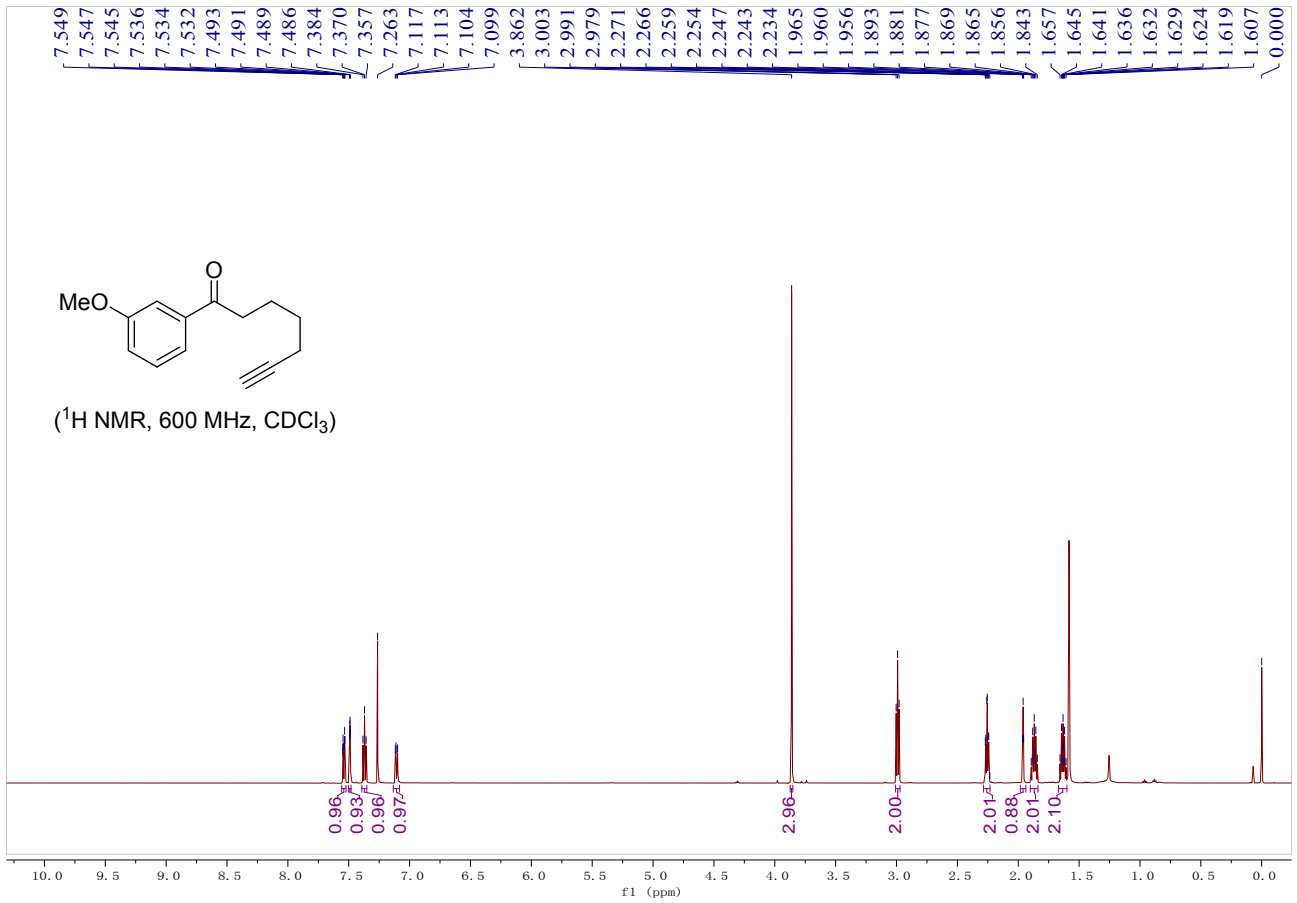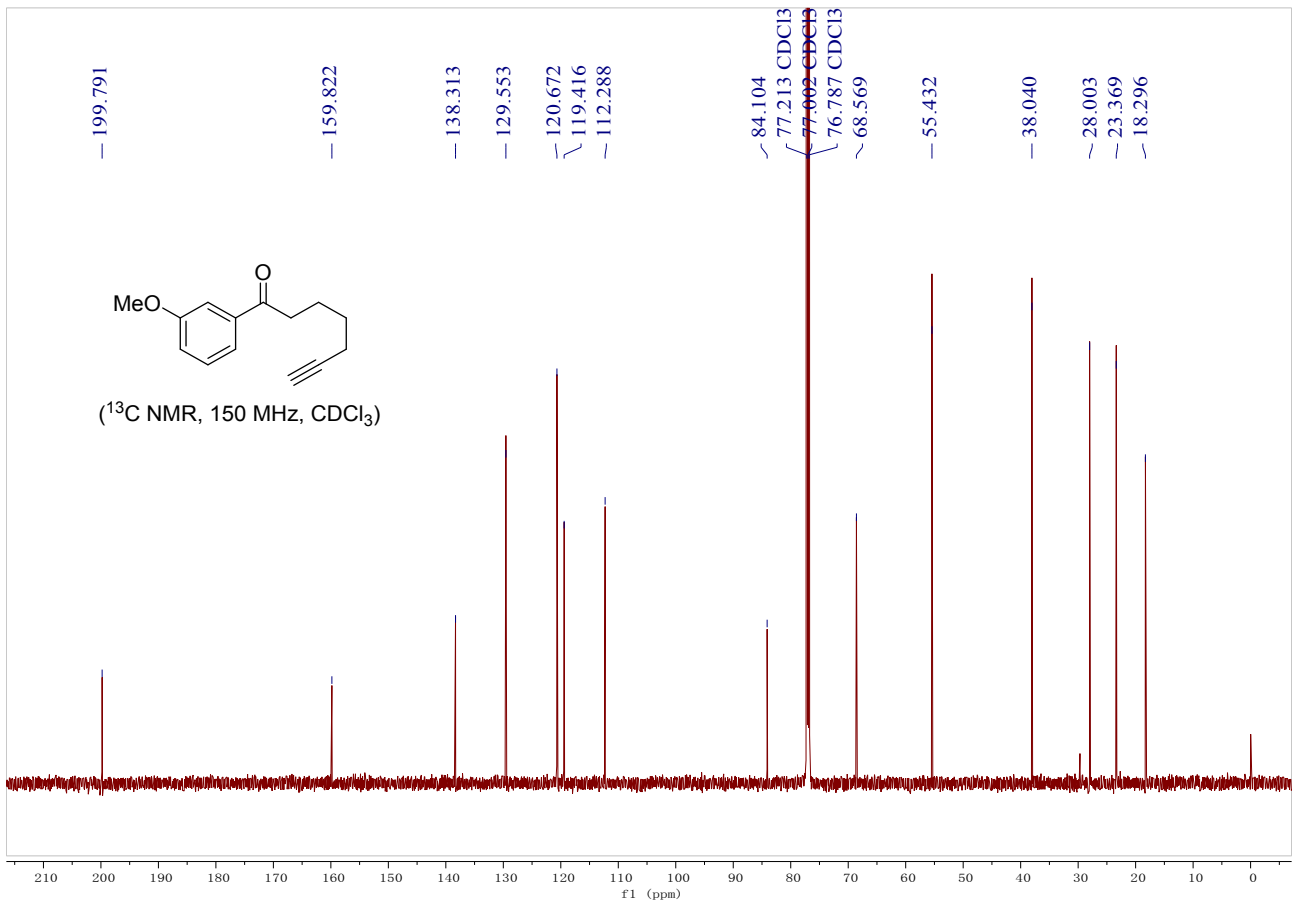

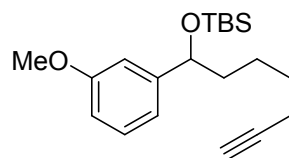

**Tert-Butyl((1-(3-methoxyphenyl)hept-6-yn-1-yl)oxy)dimethylsilane (S3):** colorless oil, 239 mg, 90%, Eluent: PE/EA = 20/1.

**<sup>1</sup>H NMR** (400 MHz, CDCl<sub>3</sub>, TMS): δ 7.20 (t, *J* = 7.8 Hz, 1H), 6.90-6.81 (m, 2H), 6.79-6.73 (m, 1H), 4.61 (dd, *J* = 7.4, 4.8 Hz, 1H), 3.80 (s, 3H), 2.20-2.12 (m, 2H), 1.92 (t, *J* = 2.6 Hz, 1H), 1.71-1.34 (m, 7H), 0.89 (s, 9H), 0.03 (s, 3H), -0.13 (s, 3H). **<sup>13</sup>C NMR** (100 MHz, CDCl<sub>3</sub>, TMS): δ -5.0, -4.6, 18.2, 18.4, 24.8, 25.8, 28.4, 40.4, 55.1, 68.2, 74.7, 84.5, 111.2, 112.3, 118.2, 128.9, 147.5, 159.4. **IR** (EtOH): ν 3310, 2974, 2925, 2892, 2214, 1652, 1380, 1346, 1307, 1224, 1150, 1005, 876, 799, 654 cm<sup>-1</sup>. **HRMS** (EI) *m/z*: [M+H]<sup>+</sup> Calcd. for C<sub>20</sub>H<sub>33</sub>O<sub>2</sub>Si 333.2244; found 333.2242.

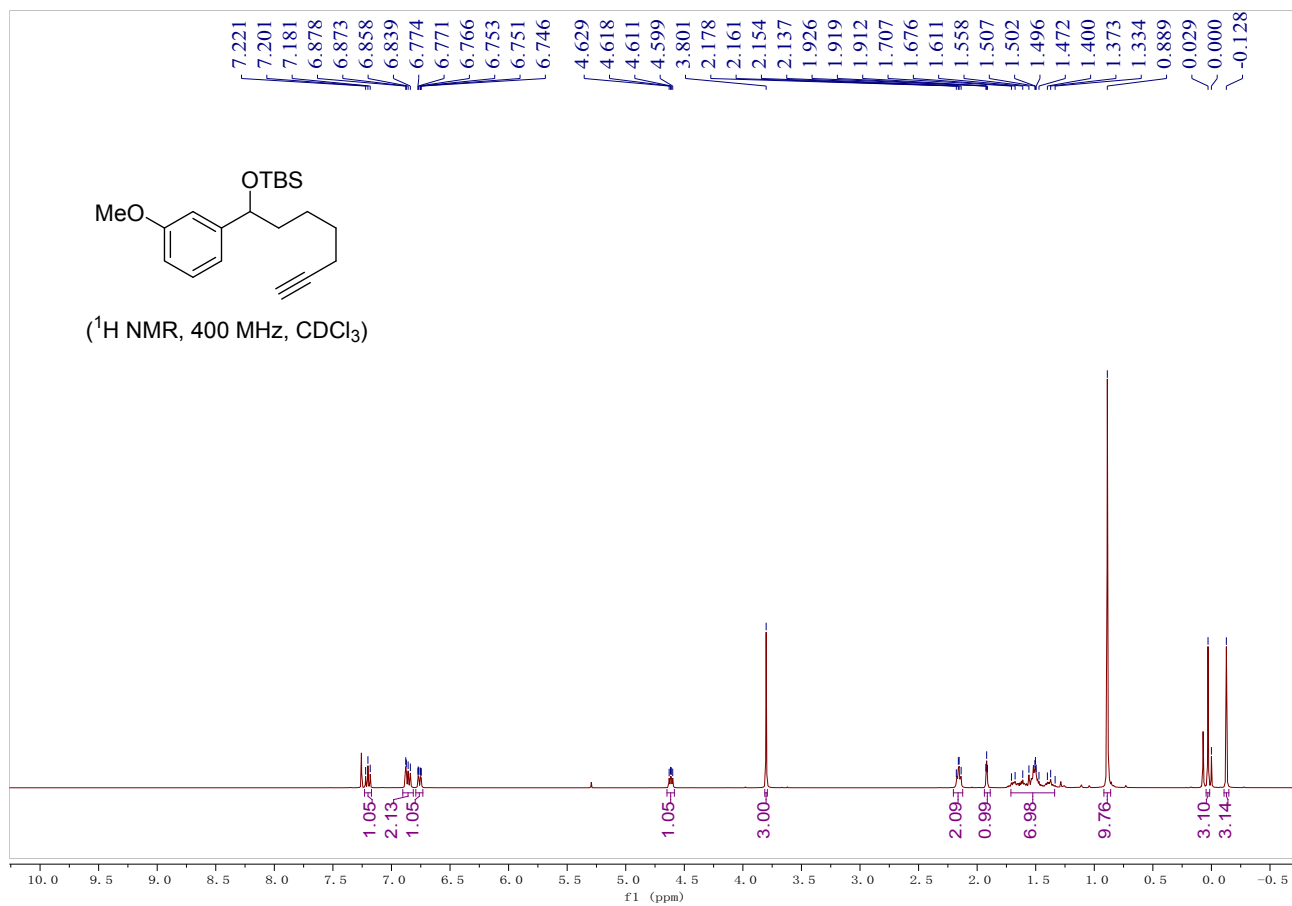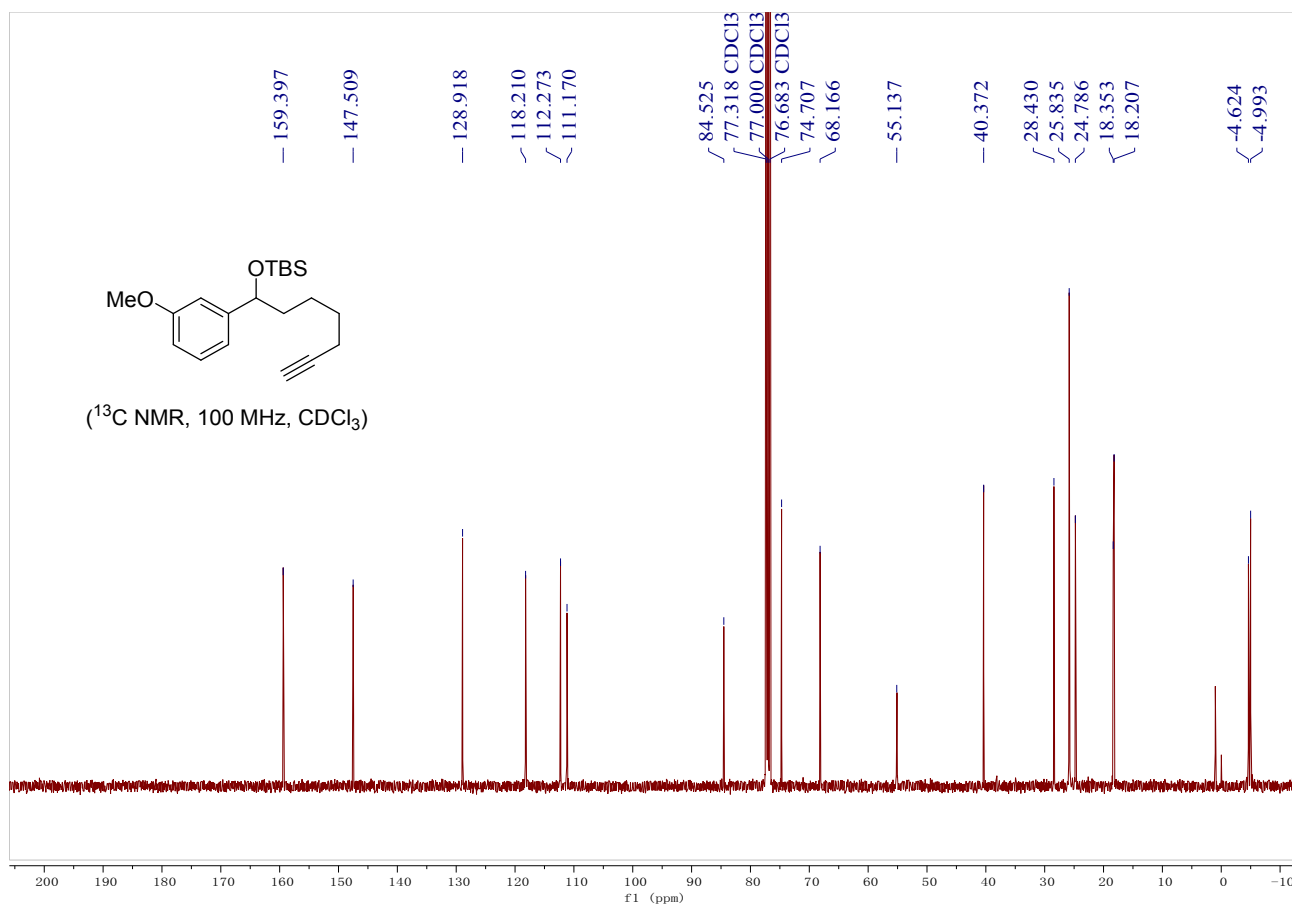

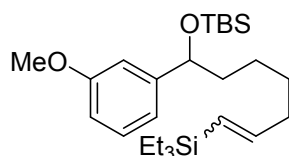

**Tert-Butyl((1-(3-methoxyphenyl)-7-(triethylsilyl)hept-6-en-1-yl)oxy)dimethylsilane (4):**

colorless oil, 117 mg, *E: Z* = 2.5: 1, 87%, Eluent: PE/EA = 20/1.

**<sup>1</sup>H NMR** (400 MHz, CDCl<sub>3</sub>, TMS): δ 7.27-7.15 (m, 1H), 6.90-6.81 (m, 2H), 6.77-6.72 (m, 1H), 6.34 (dt, *J* = 14.2, 7.2 Hz, 0.13H), 5.99 (dt, *J* = 18.6, 6.4 Hz, 0.72H), 5.60 (dt, *J* = 3.2, 1.6 Hz, 0.1H), 5.51 (d, *J* = 18.6 Hz, 0.72H), 5.38 (d, *J* = 14.2 Hz, 0.13H), 5.27 (d, *J* = 2.8 Hz, 0.1H), 4.64-4.56 (m, 1H), 3.80 (s, 3H), 2.15-2.01 (m, 2H), 1.75-1.56 (m, 2H), 1.43-1.23 (m, 4H), 0.97-0.85 (m, 18H), 0.60-0.52 (m, 6H), 0.02 (s, 3H), -0.13 (s, 3H). **<sup>13</sup>C NMR** (100 MHz, CDCl<sub>3</sub>, TMS): δ -5.0, -4.6, 3.5, 4.7, 7.4, 7.5, 18.2, 25.1, 25.3, 25.8, 25.9, 28.8, 28.9, 36.2, 37.0, 40.8, 40.9, 55.06, 55.11, 74.8, 74.9, 111.2, 112.19, 112.24, 118.2, 125.0, 125.6, 128.9, 147.7, 148.5, 149.0, 150.1, 159.4. **IR** (EtOH): ν 2943, 2910, 2861, 1650, 1544, 1355, 1306, 1287, 1234, 1149, 1065, 1008, 886, 802, 683, 654. **HRMS** (ESI) *m/z*: [M+Na]<sup>+</sup> Calcd. for C<sub>26</sub>H<sub>48</sub>O<sub>2</sub>Si<sub>2</sub>Na 471.3091; found 471.3092.

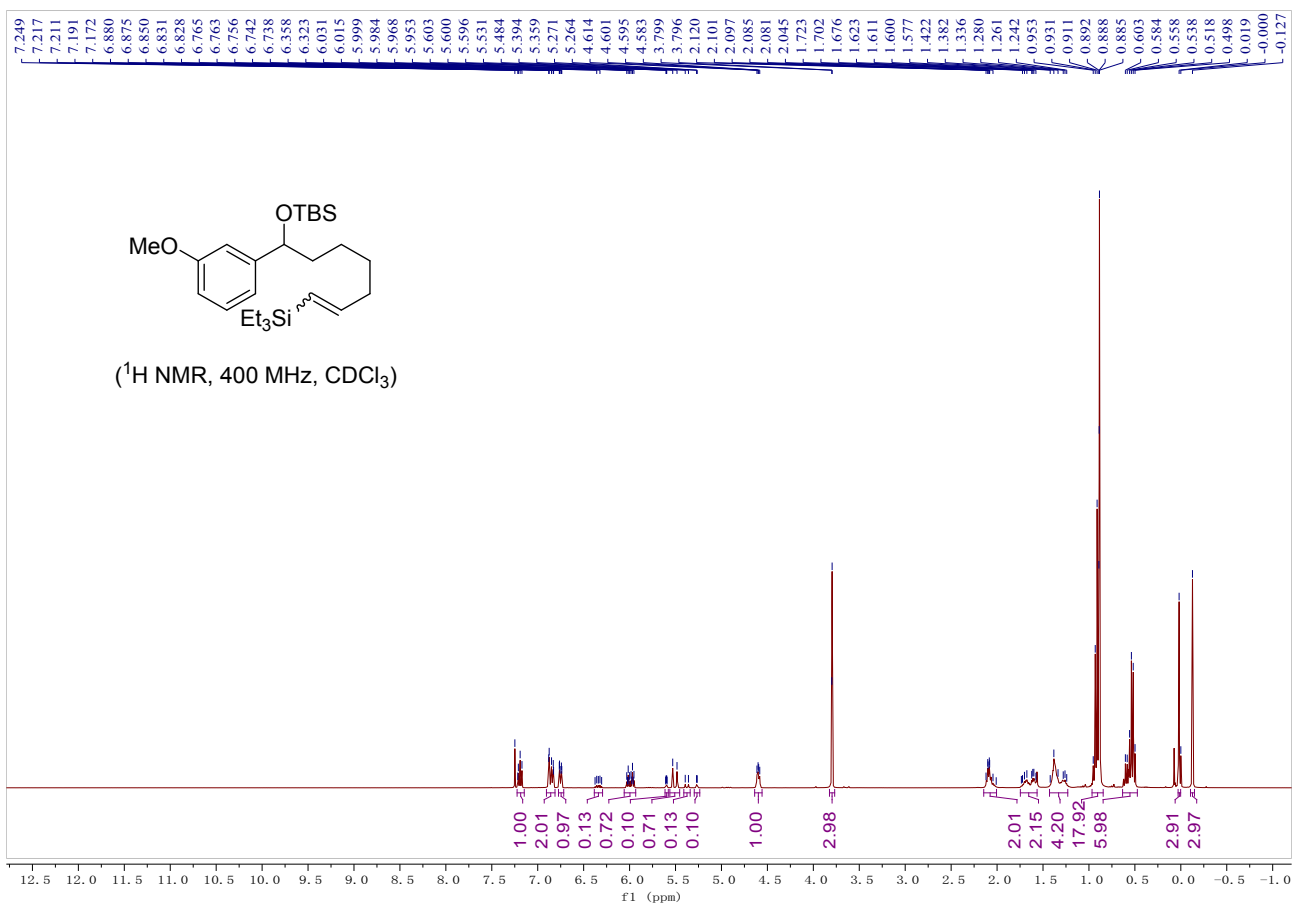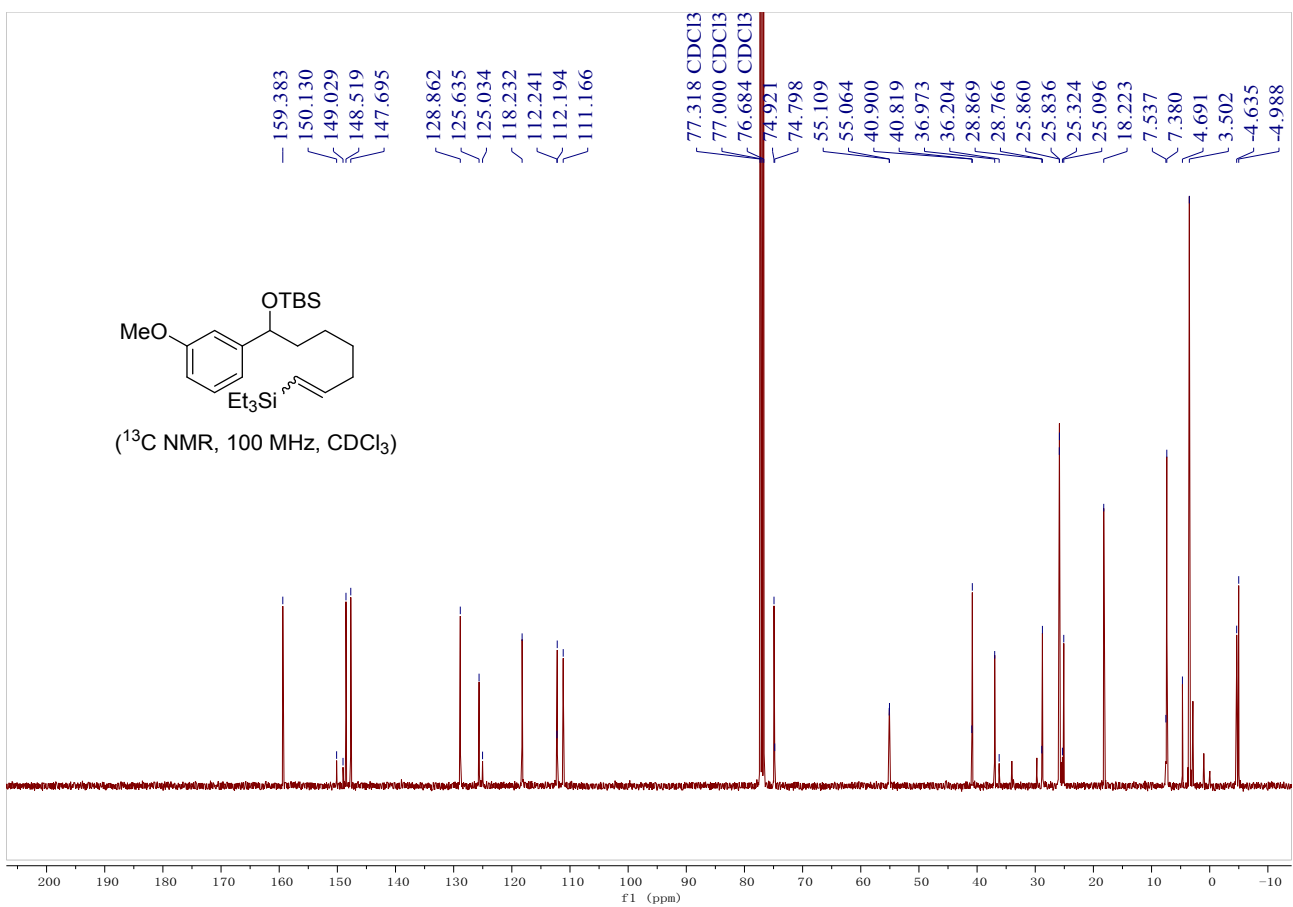

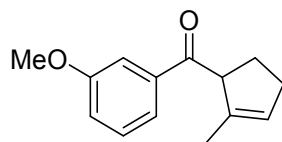

**(3-methoxyphenyl)(2-methylcyclopent-2-en-1-yl)methanone (5)**: colorless oil, 58 mg, 90%,  
Eluent: PE/EA = 20/1.

**<sup>1</sup>H NMR** (400 MHz, CDCl<sub>3</sub>, TMS): δ 7.22 (t, *J* = 7.8 Hz, 1H), 6.95 (d, *J* = 7.8 Hz, 1H), 6.92 (t, *J* = 2.1 Hz, 1H), 6.79 (dd, *J* = 8.4, 2.6 Hz, 1H), 6.40-6.39 (m, 1H), 4.02-3.95 (m, 1H), 3.80 (s, 3H), 2.67-2.63 (m, 1H), 2.43-2.31 (m, 1H), 2.13-2.05 (m, 1H), 2.03 (s, 3H). **<sup>13</sup>C NMR** (150 MHz, CDCl<sub>3</sub>, TMS): δ 26.4, 28.1, 32.5, 55.2, 60.0, 111.4, 113.0, 118.3, 129.6, 130.8, 136.8, 141.6, 159.7, 211.1. **IR** (EtOH): ν 2963, 2935, 2857, 1688, 1660, 1499, 1337, 1233, 1176, 1010, 852, 745, 685, 652 cm<sup>-1</sup>. **HRMS** (EI) *m/z*: [M]<sup>+</sup> Calcd. for C<sub>14</sub>H<sub>16</sub>O<sub>2</sub> 216.1145; found 216.1143.

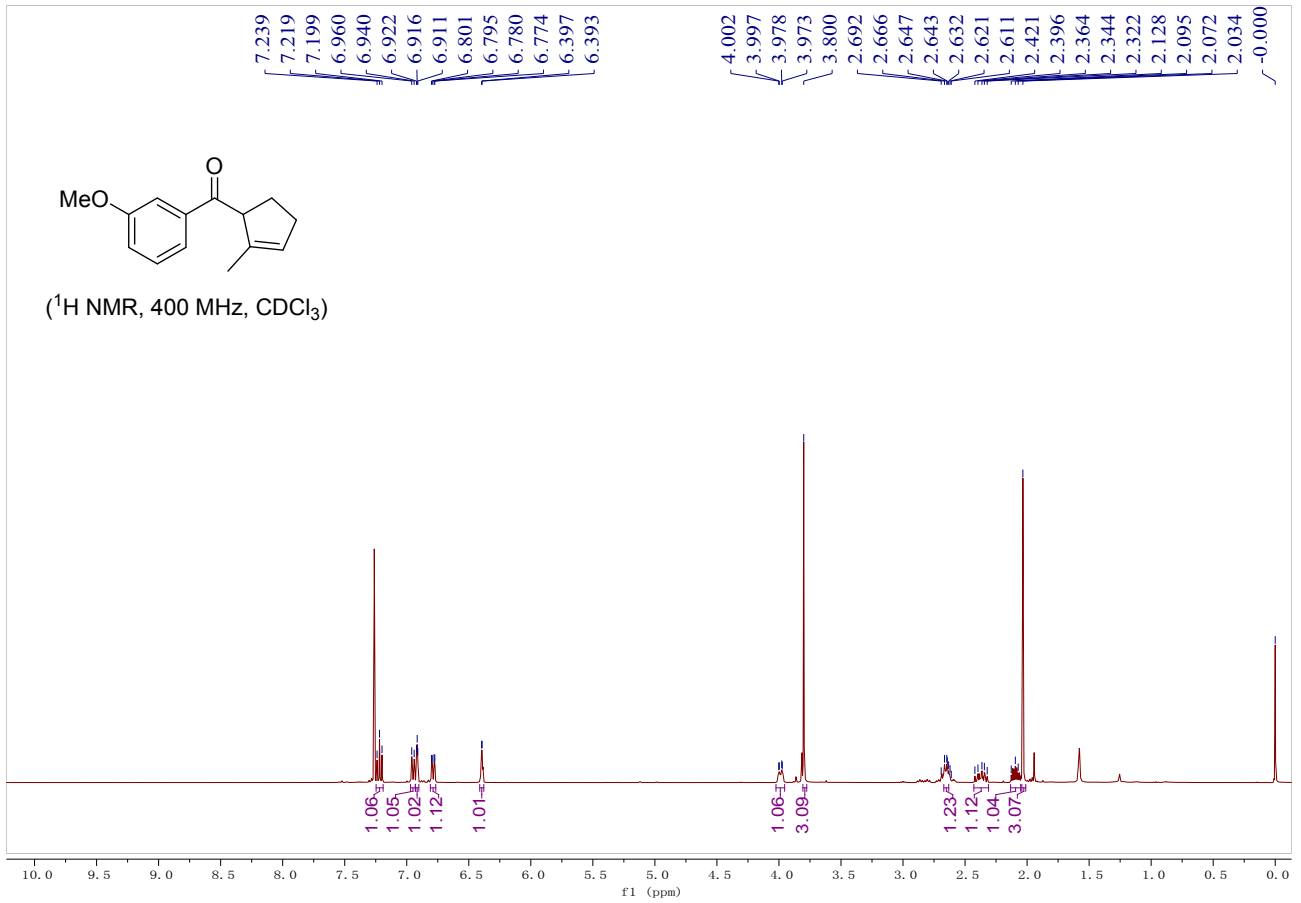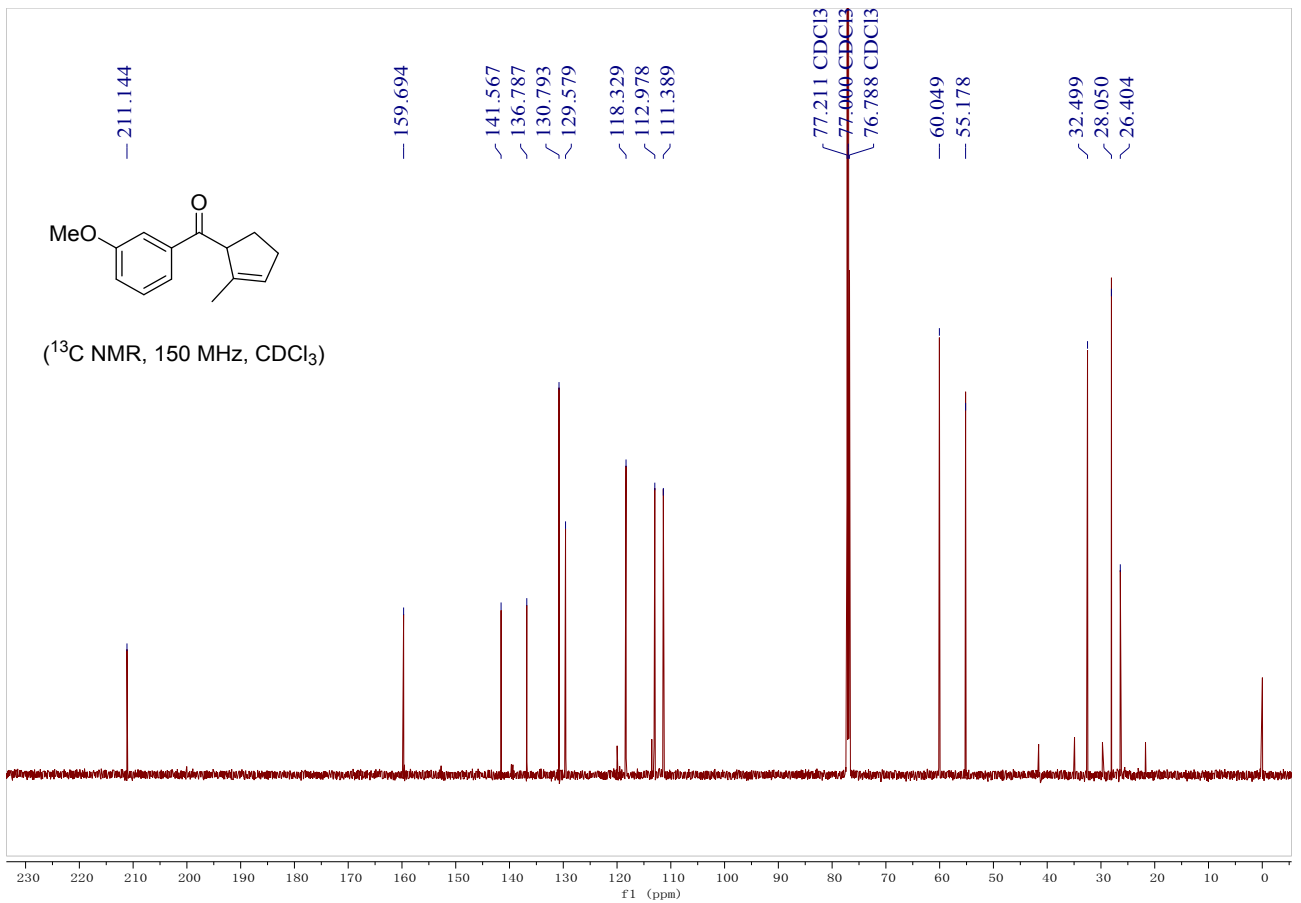

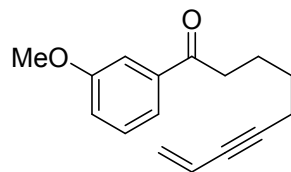

**1-(3-methoxyphenyl)non-8-en-6-yn-1-one (6)**: colorless oil, 72 mg, 99%, Eluent: PE/EA = 20/1.

**<sup>1</sup>H NMR** (400 MHz, CDCl<sub>3</sub>, TMS): δ 7.58-7.50 (m, 1H), 7.52-7.46 (m, 1H), 7.36 (t, *J* = 8.0 Hz, 1H), 7.10 (dd, *J* = 8.0, 2.8 Hz, 1H), 5.77 (ddt, *J* = 17.6, 11.0, 2.2 Hz, 1H), 5.54 (dd, *J* = 17.6, 2.2 Hz, 1H), 5.37 (dd, *J* = 11.0, 2.2 Hz, 1H), 3.85 (s, 3H), 2.99 (t, *J* = 7.2 Hz, 2H), 2.37 (td, *J* = 7.0, 2.1 Hz, 2H), 1.91-1.81 (m, 2H), 1.68-1.58 (m, 2H). **<sup>13</sup>C NMR** (100 MHz, CDCl<sub>3</sub>, TMS): δ 19.1, 23.5, 28.1, 38.0, 55.4, 79.7, 90.5, 112.2, 117.5, 119.3, 120.6, 125.6, 129.5, 138.3, 159.8, 199.8. **IR** (EtOH): ν 3074, 2934, 2271, 1682, 1640, 1599, 1456, 1429, 1345, 1254, 1042, 992, 909, 872, 780, 685, 564 cm<sup>-1</sup>. **HRMS** (ESI) *m/z*: [M+Na]<sup>+</sup> Calcd. for C<sub>16</sub>H<sub>18</sub>NaO<sub>2</sub> 265.1199; found 216.1205.



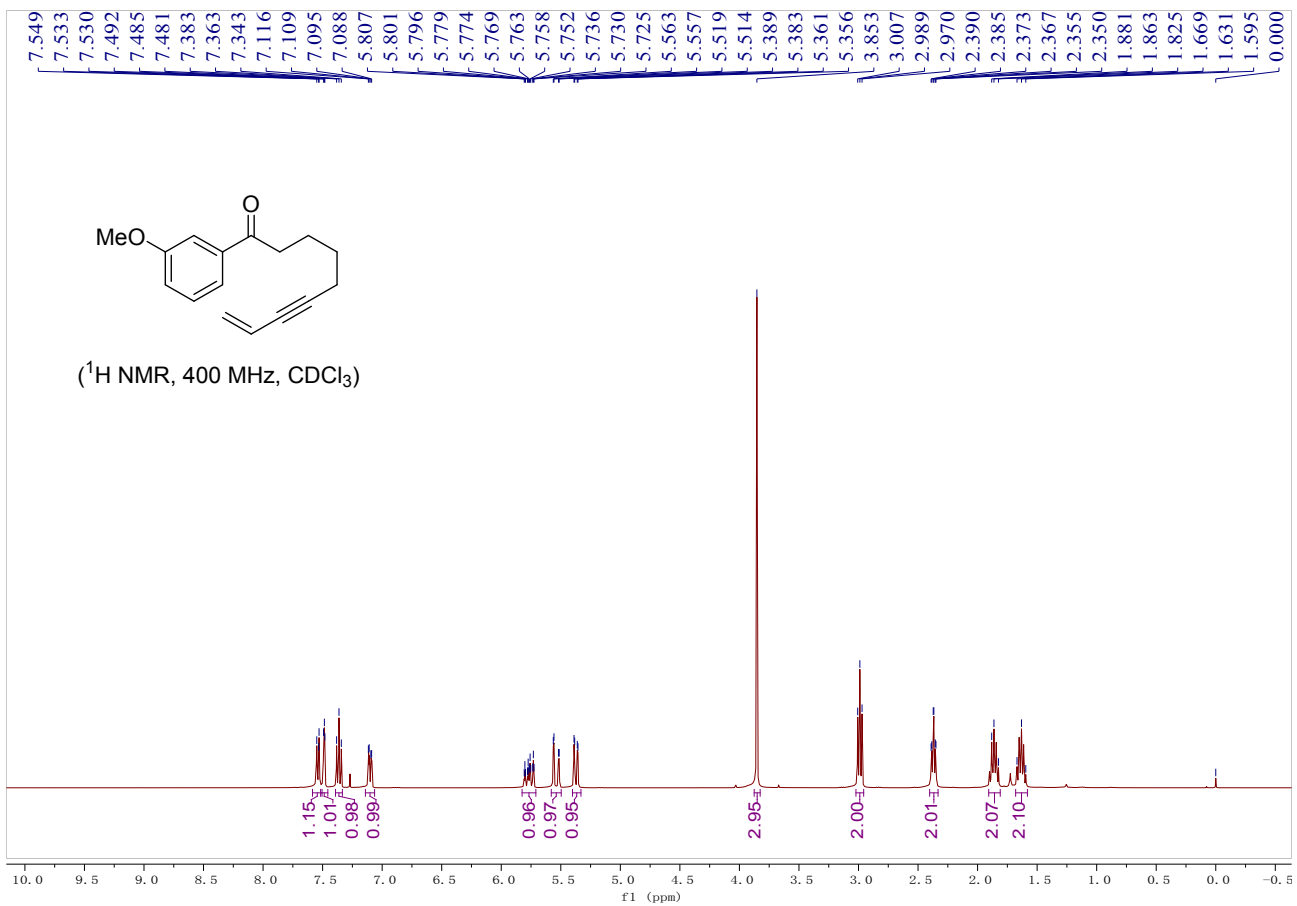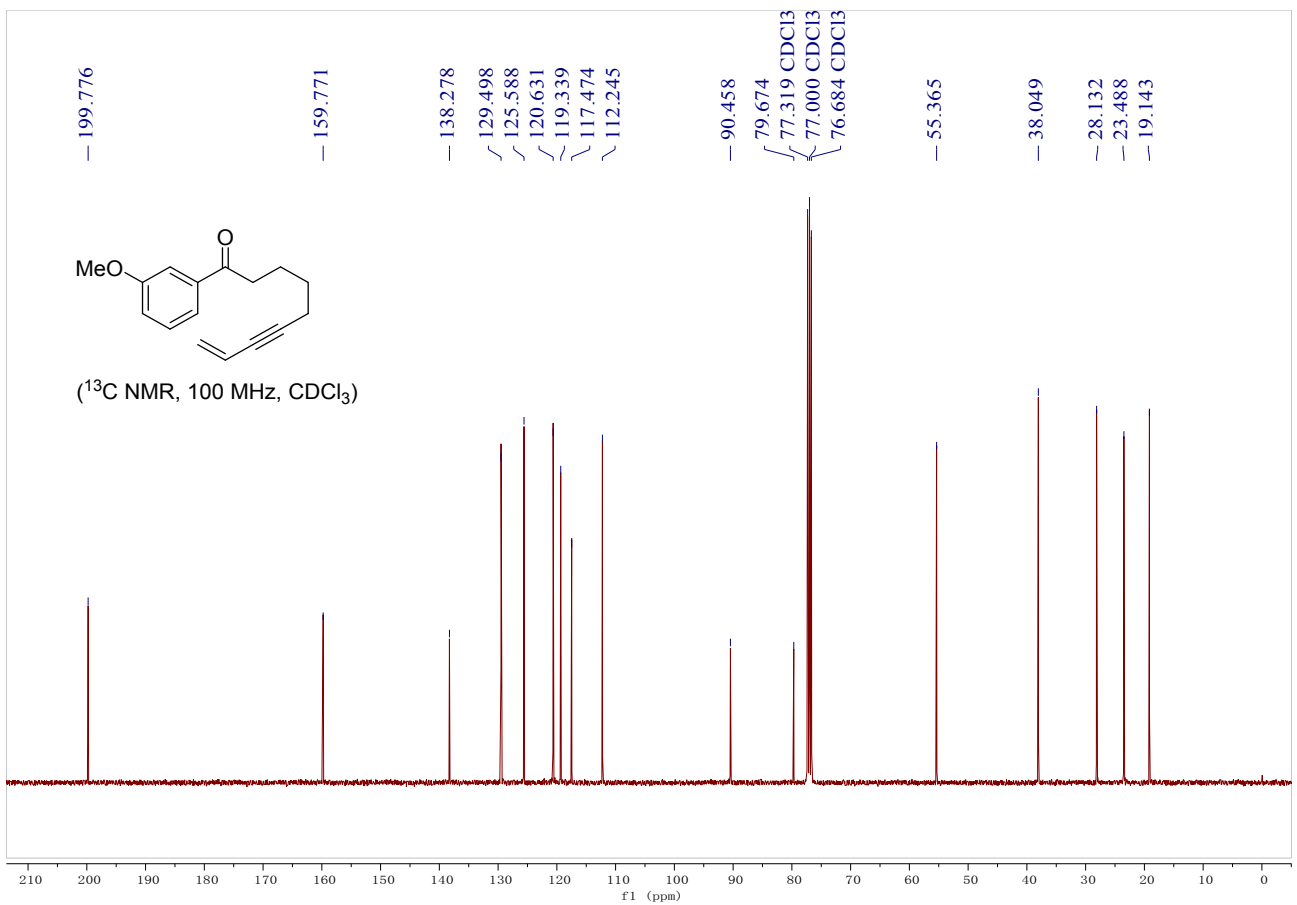

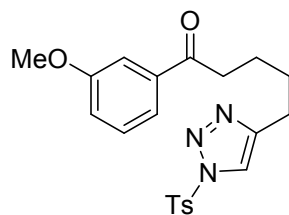

**1-(3-methoxyphenyl)-5-(1-tosyl-1H-1,2,3-triazol-4-yl)pentan-1-one (7)**: white solid, m.p. 156-158 °C, 196 mg, 95%, Eluent: PE/EA = 20/1.

**<sup>1</sup>H NMR** (400 MHz, CDCl<sub>3</sub>, TMS): δ 7.98 (d, *J* = 8.4 Hz, 2H), 7.89 (s, 1H), 7.36 (t, *J* = 7.8 Hz, 3H), 7.11 (dd, *J* = 8.2, 2.8 Hz, 1H), 3.86 (s, 3H), 2.98 (t, *J* = 6.6 Hz, 2H), 2.77 (t, *J* = 7.0 Hz, 2H), 2.44 (s, 3H), 1.83-1.72 (m, 4H). **<sup>13</sup>C NMR** (150 MHz, CDCl<sub>3</sub>, TMS): δ 21.8, 23.6, 25.2, 28.4, 38.1, 55.4, 112.3, 119.4, 120.4, 120.6, 128.5, 129.6, 130.4, 133.2, 138.2, 147.0, 147.7, 159.8, 199.7. **IR** (EtOH): ν 2940, 2915, 2543, 2021, 1678, 1597, 1582, 1486, 1452, 1257, 1165, 1121, 1033, 1009, 817, 784, 682 cm<sup>-1</sup>. **HRMS** (DART) *m/z*: [M+H]<sup>+</sup> Calcd. for C<sub>21</sub>H<sub>24</sub>N<sub>3</sub>O<sub>4</sub>S 414.1482; found 414.1479.

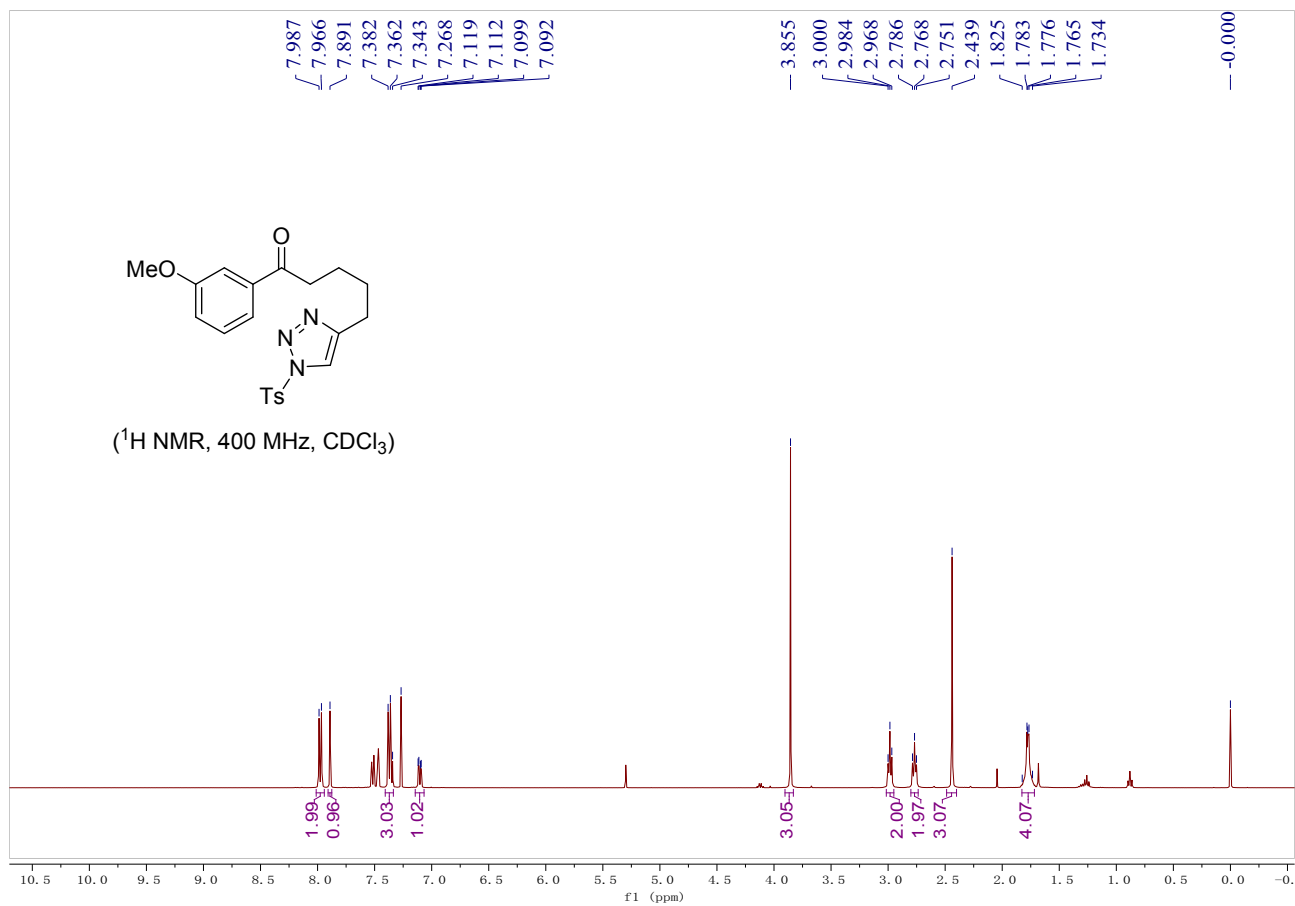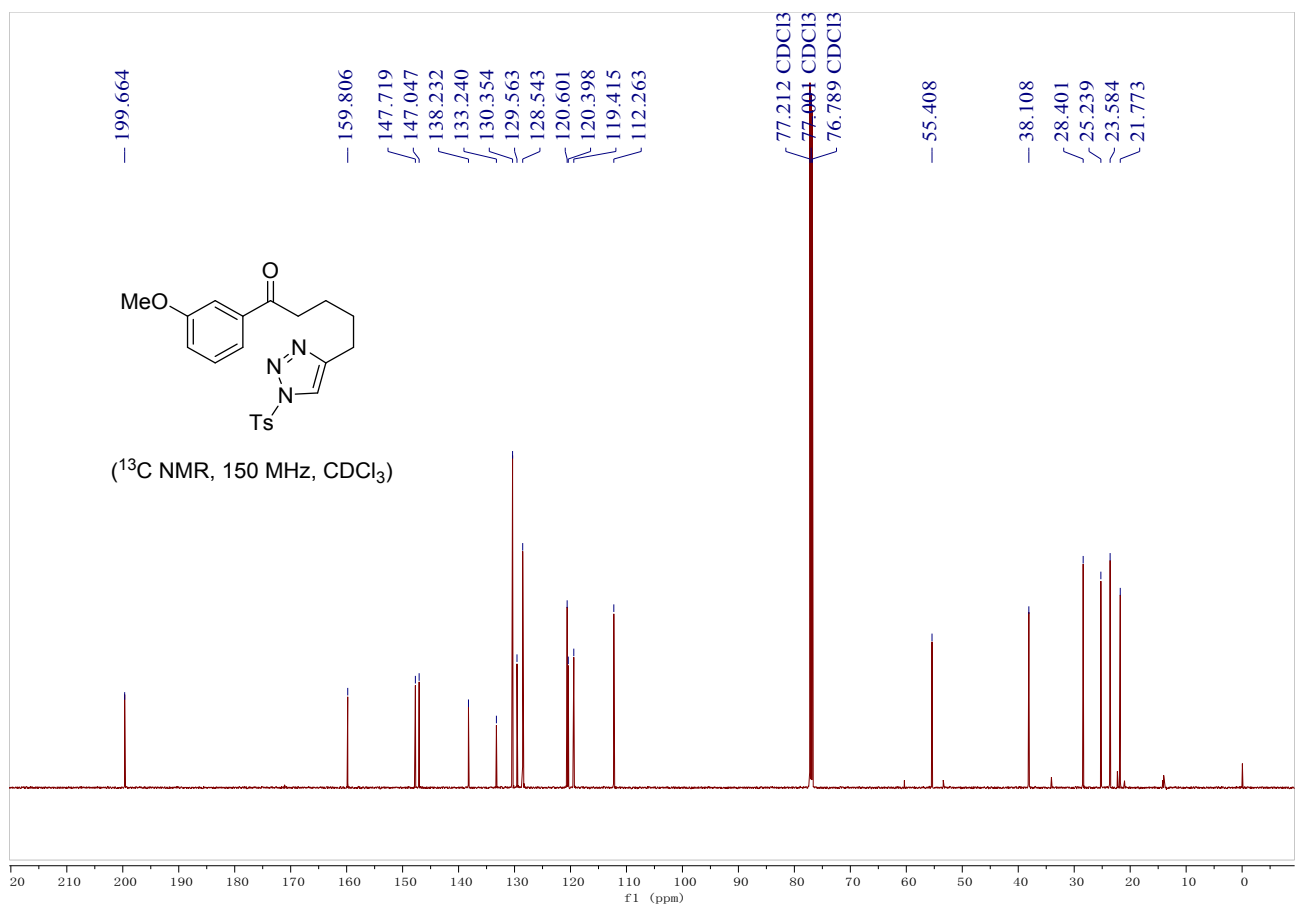

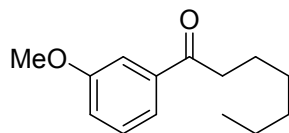

**1-(3-methoxyphenyl)heptan-1-one (8):** colorless oil, 65 mg, 98%, Eluent: PE/EA = 20/1.

**<sup>1</sup>H NMR** (400 MHz, CDCl<sub>3</sub>, TMS): δ 7.54 (dd, *J* = 7.8, 1.2 Hz, 1H), 7.52-7.46 (m, 1H), 7.36 (t, *J* = 7.8 Hz, 1H), 7.09 (dd, *J* = 8.4, 2.4 Hz, 1H), 3.85 (s, 3H), 2.94 (t, *J* = 7.4 Hz, 2H), 1.79-1.67 (m, 2H), 1.41-1.27 (m, 6H), 0.94-0.85 (m, 3H). **<sup>13</sup>C NMR** (100 MHz, CDCl<sub>3</sub>, TMS): δ 14.0, 22.5, 24.4, 29.0, 31.6, 38.7, 55.4, 112.3, 119.2, 120.7, 129.5, 138.5, 159.8, 200.4. **IR** (EtOH): ν 2998, 2967, 2934, 2870, 1681, 1514, 1429, 1264, 1167, 870, 753, 680 cm<sup>-1</sup>. **HRMS** (EI) *m/z*: [M]<sup>+</sup> Calcd. for C<sub>14</sub>H<sub>20</sub>O<sub>2</sub> 220.1458; found 220.1456.

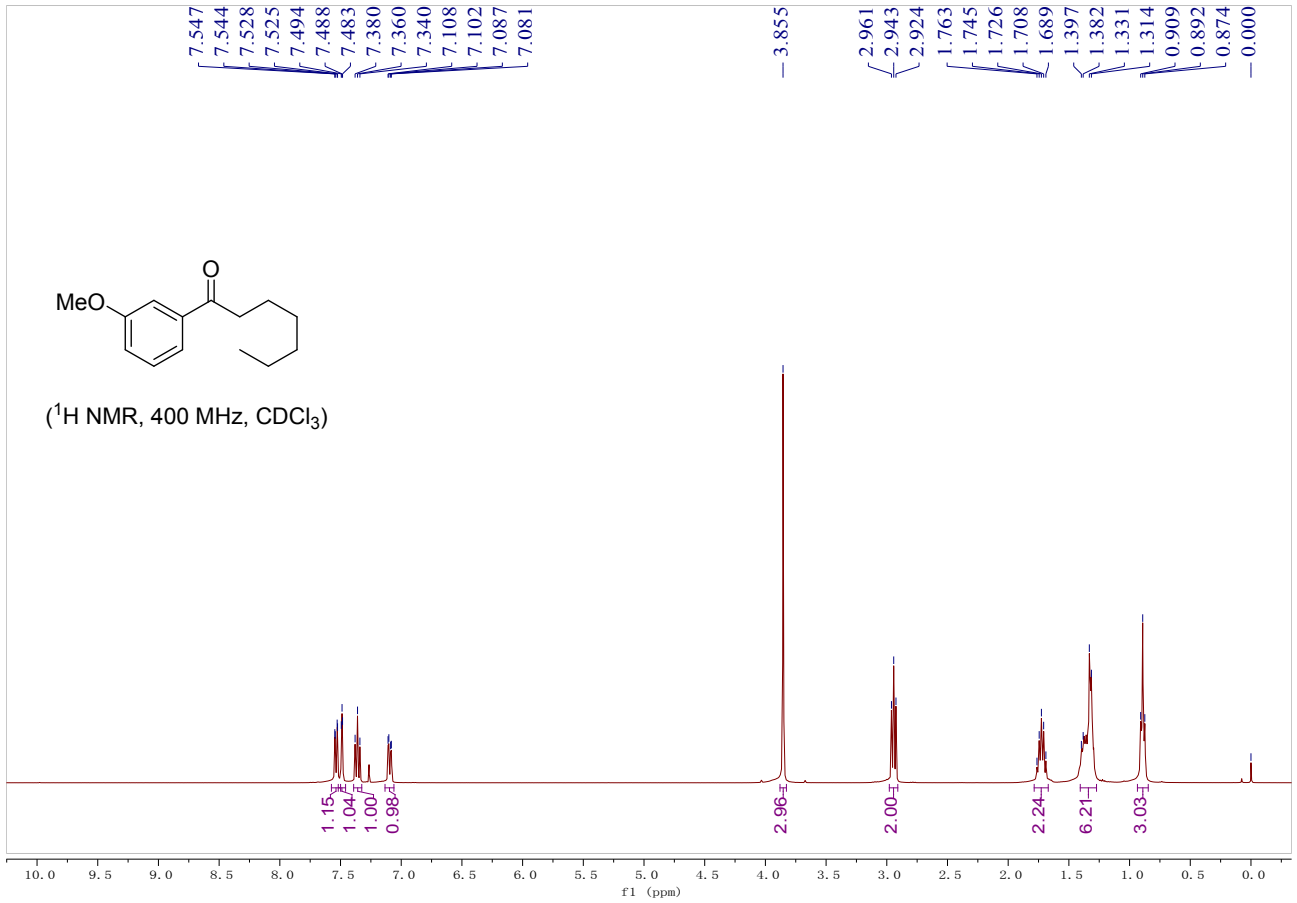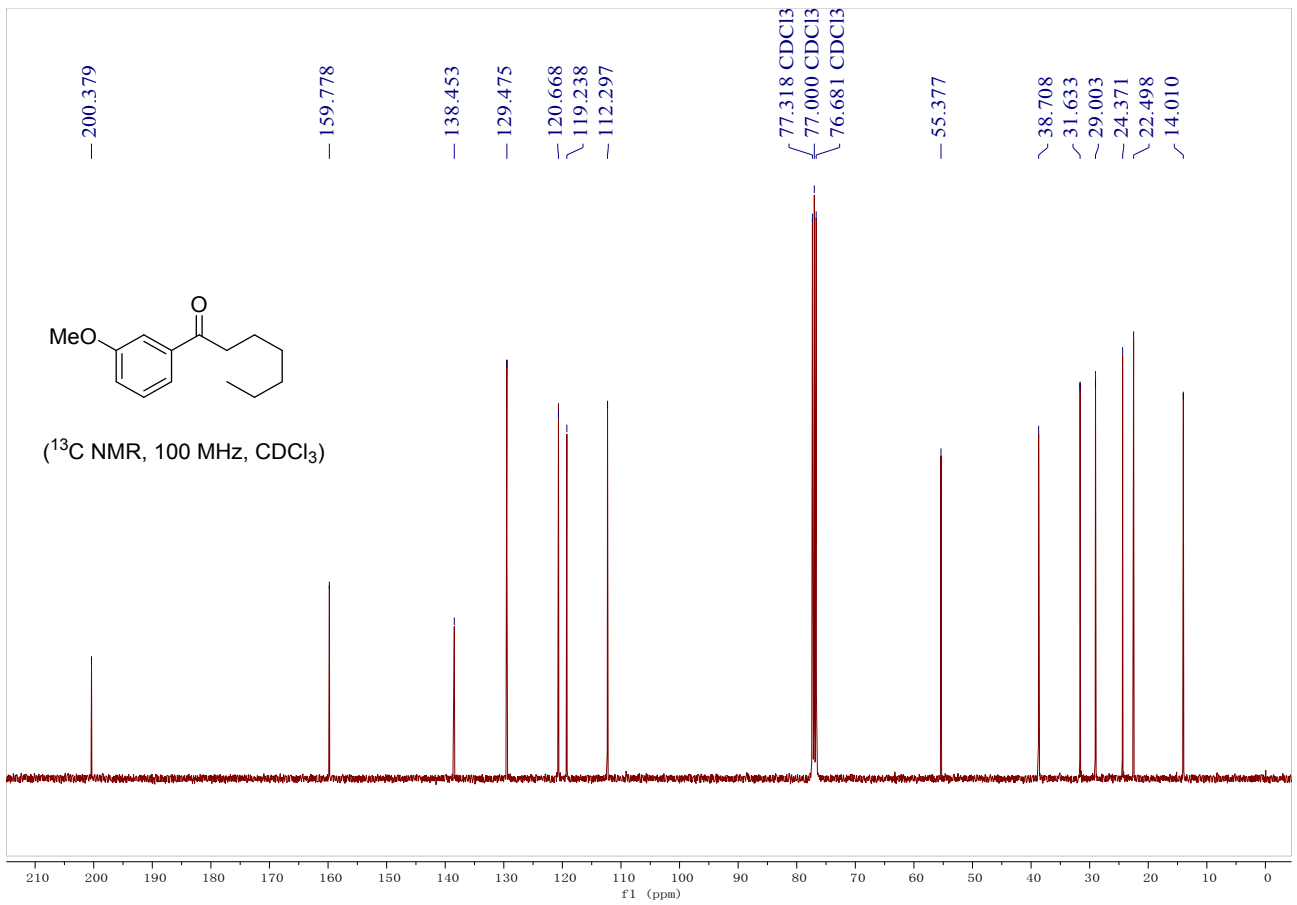

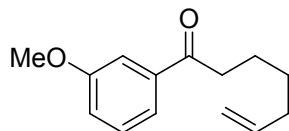

**1-(3-methoxyphenyl)hept-6-en-1-one (9)**: colorless oil, 62 mg, 95%, Eluent: PE/EA = 20/1.

**<sup>1</sup>H NMR** (400 MHz, CDCl<sub>3</sub>, TMS): δ 7.53 (dt, *J* = 7.8, 1.2 Hz, 1H), 7.49 (dd, *J* = 2.8, 1.6 Hz, 1H), 7.36 (t, *J* = 8.0 Hz, 1H), 7.10 (dd, *J* = 8.2, 2.8 Hz, 1H), 5.82 (ddt, *J* = 16.8, 10.2, 6.8 Hz, 1H), 5.07-4.93 (m, 2H), 3.85 (s, 3H), 2.96 (t, *J* = 7.4 Hz, 2H), 2.16-2.05 (m, 2H), 1.80-1.70 (m, 2H), 1.53-1.43 (m, 2H). **<sup>13</sup>C NMR** (100 MHz, CDCl<sub>3</sub>, TMS): δ 23.8, 28.5, 33.5, 38.5, 55.4, 112.3, 114.6, 119.3, 120.6, 129.5, 138.4, 138.5, 159.8, 200.1. **IR** (EtOH): ν 3056, 2935, 2892, 2845, 1679, 1640, 1584, 1485, 1324, 1256, 1042, 1002, 998, 867, 780, 667 cm<sup>-1</sup>. **HRMS** (EI) *m/z*: [M]<sup>+</sup> Calcd. for C<sub>14</sub>H<sub>18</sub>O<sub>2</sub> 218.1301; found 218.1299.

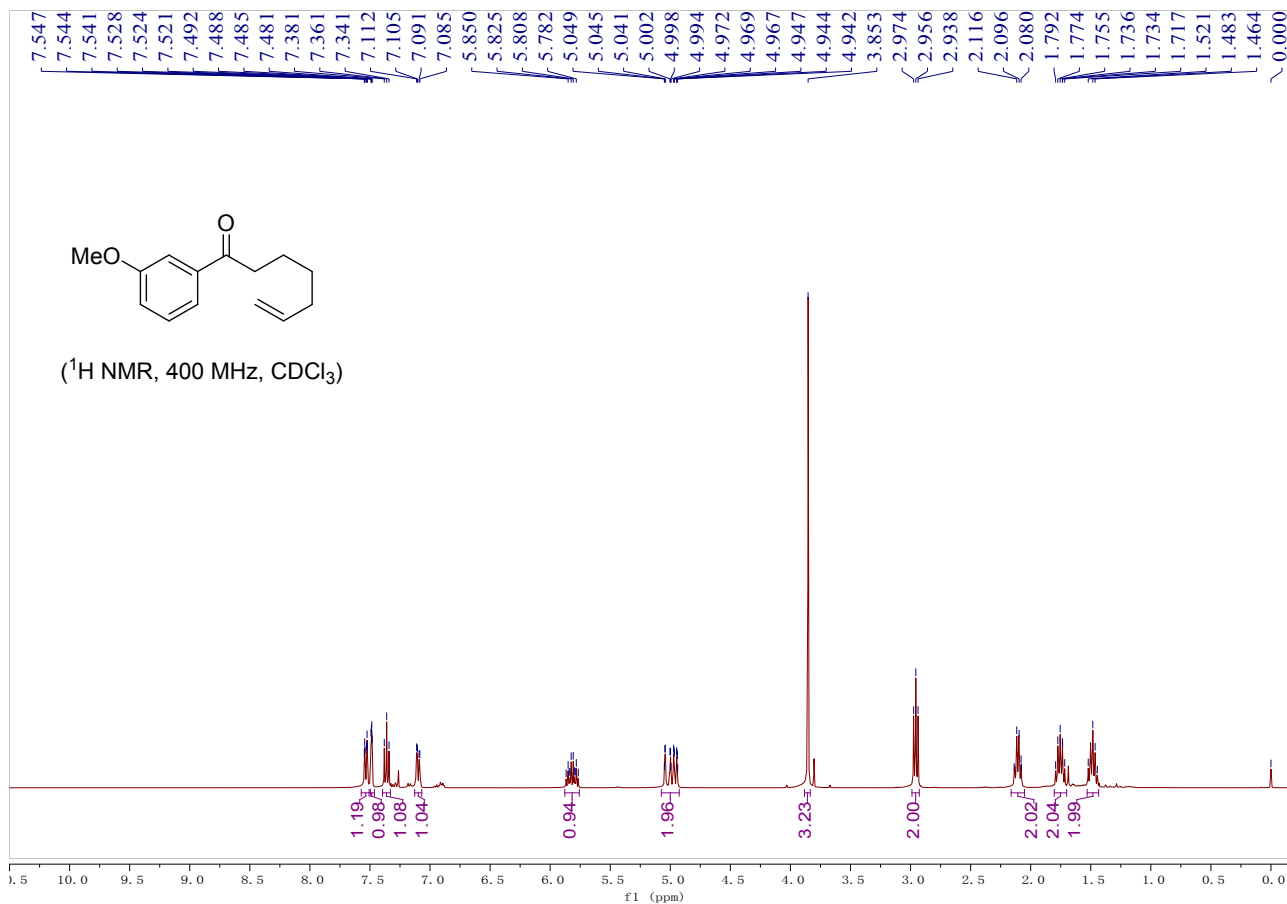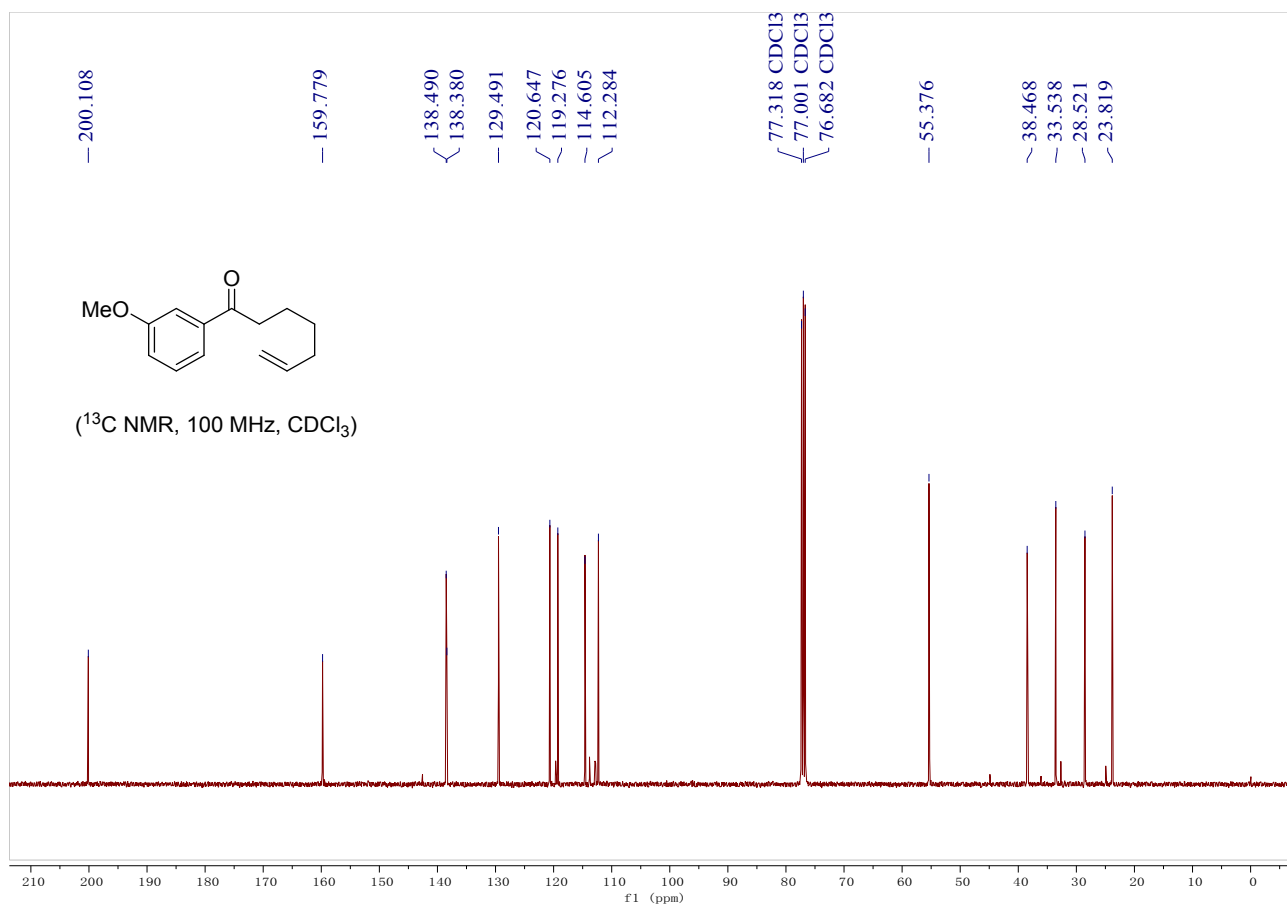

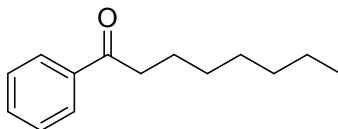

**1-phenyloctan-1-one (S4):** colorless oil, 1.5 g, 98%, Eluent: PE/EA = 20/1.

**<sup>1</sup>H NMR** (400 MHz, CDCl<sub>3</sub>, TMS): δ 7.98-7.94 (m, 2H), 7.57-7.51 (m, 1H), 7.49-7.40 (m, 2H), 2.95 (t, *J* = 7.4 Hz, 2H), 1.77-1.69 (m, 2H), 1.43-1.22 (m, 8H), 0.87 (t, *J* = 6.4 Hz, 3H). **<sup>13</sup>C NMR** (100 MHz, CDCl<sub>3</sub>, TMS): δ 14.0, 22.6, 24.3, 29.1, 29.3, 31.7, 38.5, 128.0, 128.5, 132.8, 137.0, 200.5. **IR** (EtOH): ν 2925, 2855, 1682, 1598, 1450, 1221, 1086, 1045, 880, 750, 689 cm<sup>-1</sup>. **HRMS** (EI) *m/z*: [M]<sup>+</sup> Calcd. for C<sub>14</sub>H<sub>20</sub>O 204.1509; found 204.1506.



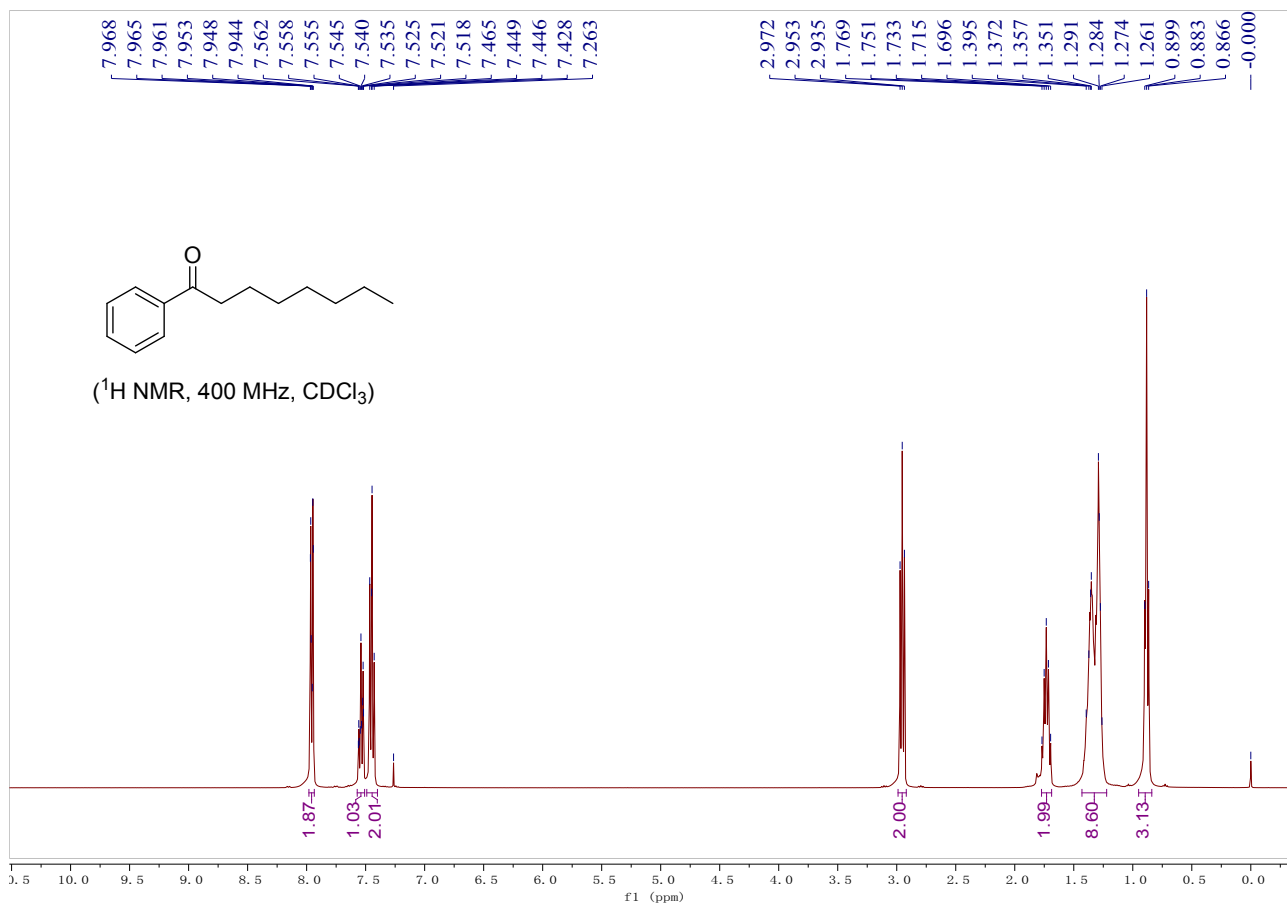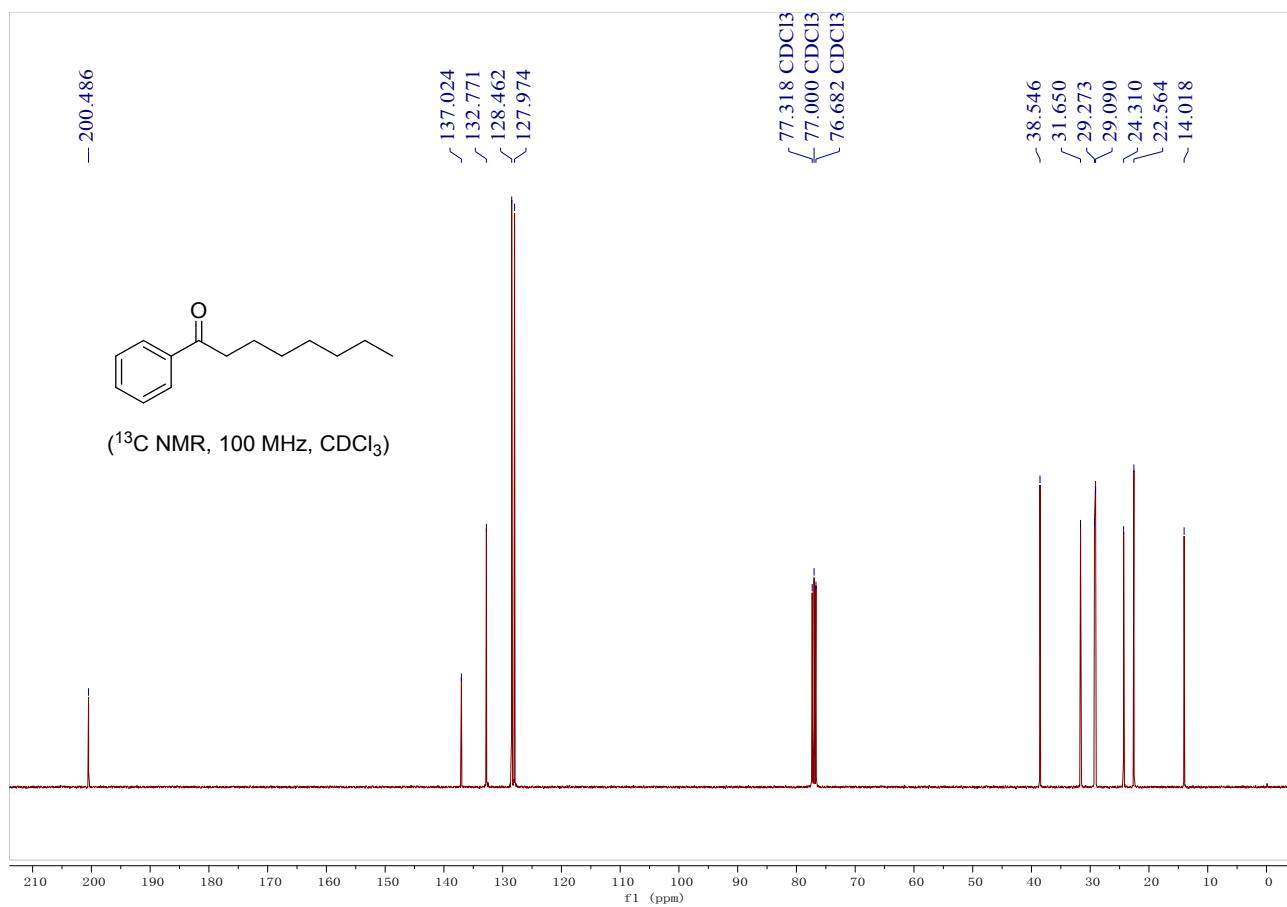

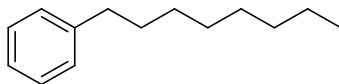

**Octylbenzene (10):** colorless oil, 910 mg, 65%, Eluent: PE/EA = 20/1.

**<sup>1</sup>H NMR** (600 MHz, CDCl<sub>3</sub>, TMS): δ 7.29-7.25 (m, 2H), 7.20-7.13 (m, 3H), 2.60 (t, *J* = 7.2 Hz, 2H), 1.65-1.57 (m, 2H), 1.37-1.21 (m, 10H), 0.88 (t, *J* = 7.0 Hz, 3H). **<sup>13</sup>C NMR** (150 MHz, CDCl<sub>3</sub>, TMS): δ 14.1, 22.7, 29.3, 29.4, 29.5, 31.5, 31.9, 36.0, 125.5, 128.2, 128.4, 143.0. **IR** (EtOH): ν 3027, 2922, 2908, 2853, 1495, 1457, 1376, 743, 696 cm<sup>-1</sup>. **HRMS** (EI) *m/z*: [M]<sup>+</sup> Calcd. for C<sub>14</sub>H<sub>22</sub> 190.1716; found 190.1714.

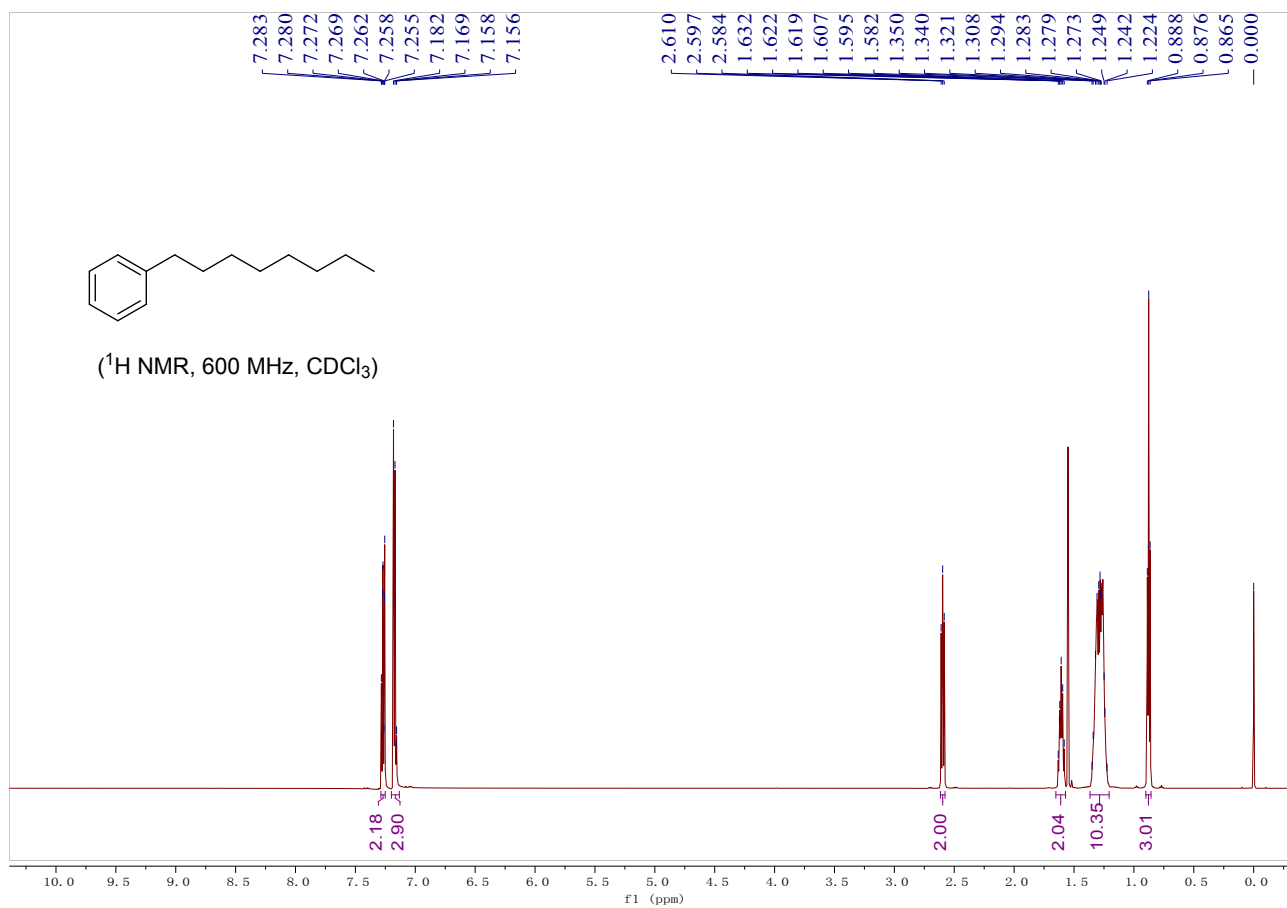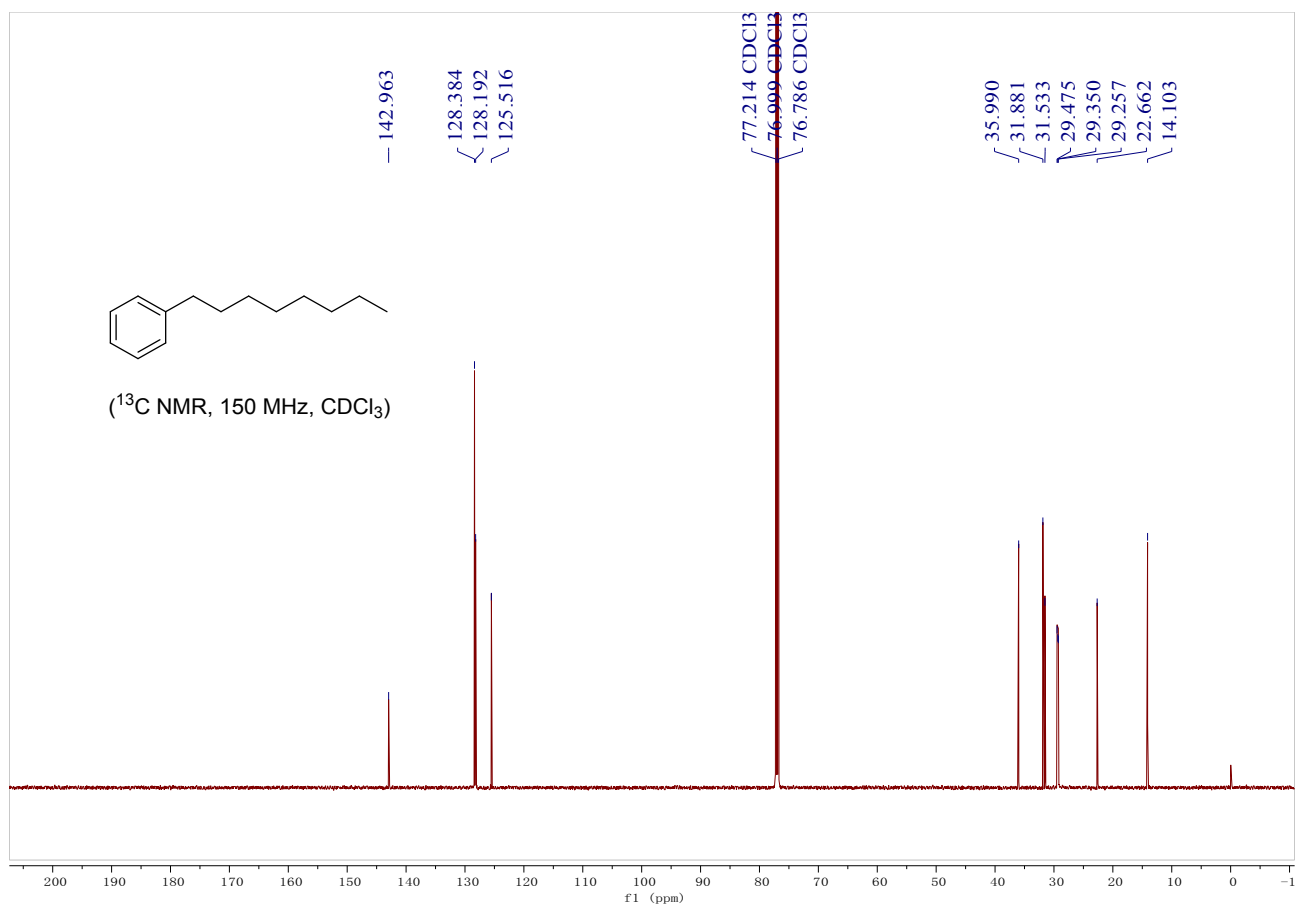

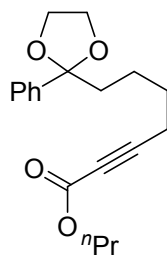

**Propyl 7-(2-phenyl-1,3-dioxolan-2-yl)hept-2-ynoate (S5):** colorless oil, 1.3 g, 91%, Eluent: PE/EA = 20/1.

**$^1\text{H NMR}$**  (400 MHz,  $\text{CDCl}_3$ , TMS):  $\delta$  7.48-7.39 (m, 2H), 7.37-7.27 (m, 3H), 4.10 (t,  $J = 6.7$  Hz, 2H), 4.05-3.97 (m, 2H), 3.81-3.72 (m, 2H), 2.28 (t,  $J = 7.2$  Hz, 2H), 1.94-1.86 (m, 2H), 1.69 (h,  $J = 7.2$  Hz, 2H), 1.60-1.53 (m, 3H), 1.50-1.41 (m, 2H), 0.96 (t,  $J = 7.4$  Hz, 3H).  **$^{13}\text{C NMR}$**  (100 MHz,  $\text{CDCl}_3$ , TMS):  $\delta$  10.3, 18.7, 21.8, 23.0, 27.6, 39.8, 64.5, 67.3, 73.1, 89.2, 110.2, 125.6, 127.8, 128.1, 142.4, 154.0. **IR** (EtOH):  $\nu$  2952, 2923, 2234, 1707, 1463, 1390, 1244, 1075, 1042, 958, 766, 751, 703  $\text{cm}^{-1}$ . **HRMS** (ESI)  $m/z$ :  $[\text{M}+\text{Na}]^+$  Calcd. for  $\text{C}_{19}\text{H}_{24}\text{O}_4\text{Na}$  339.1567; found 339.1569.

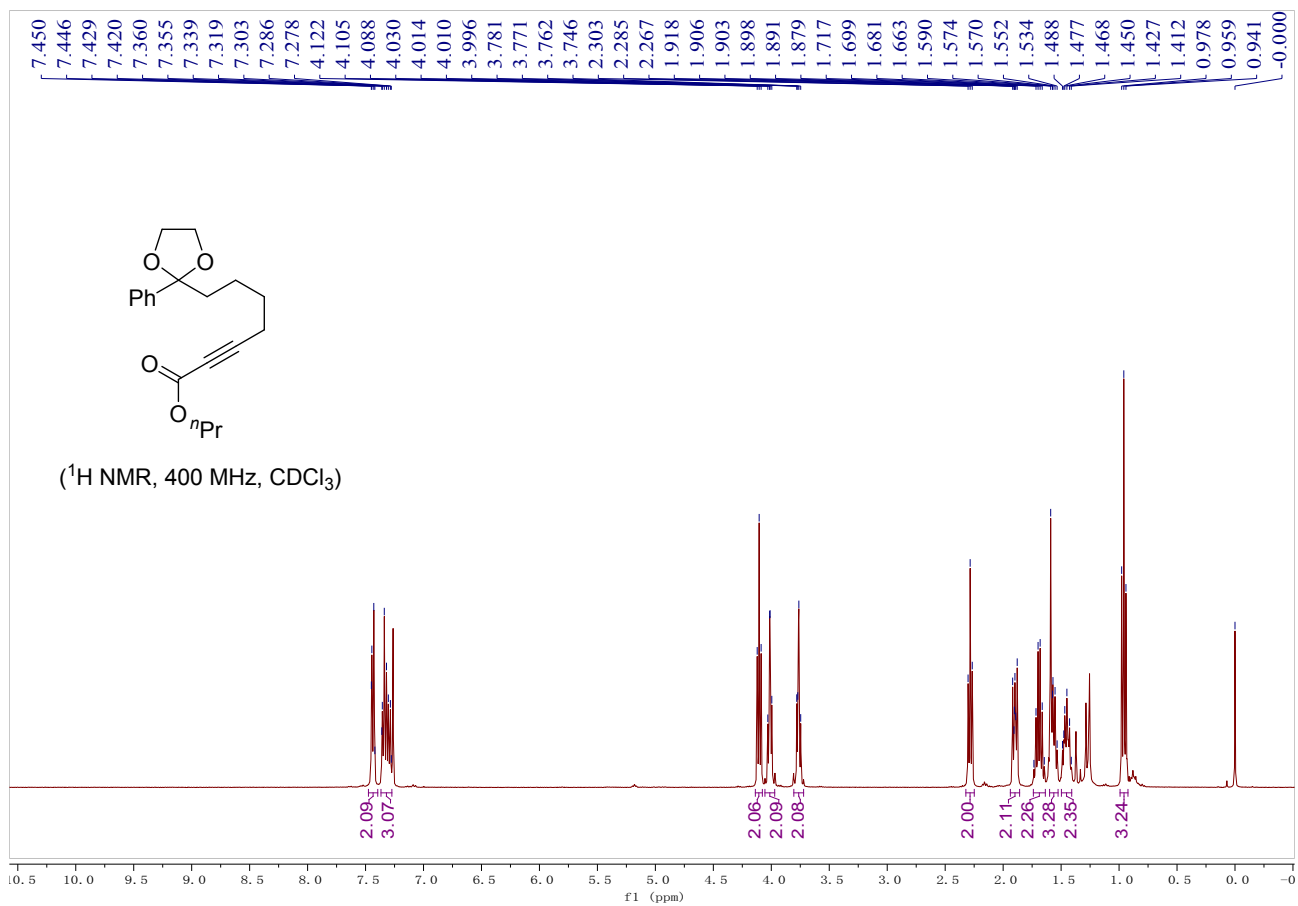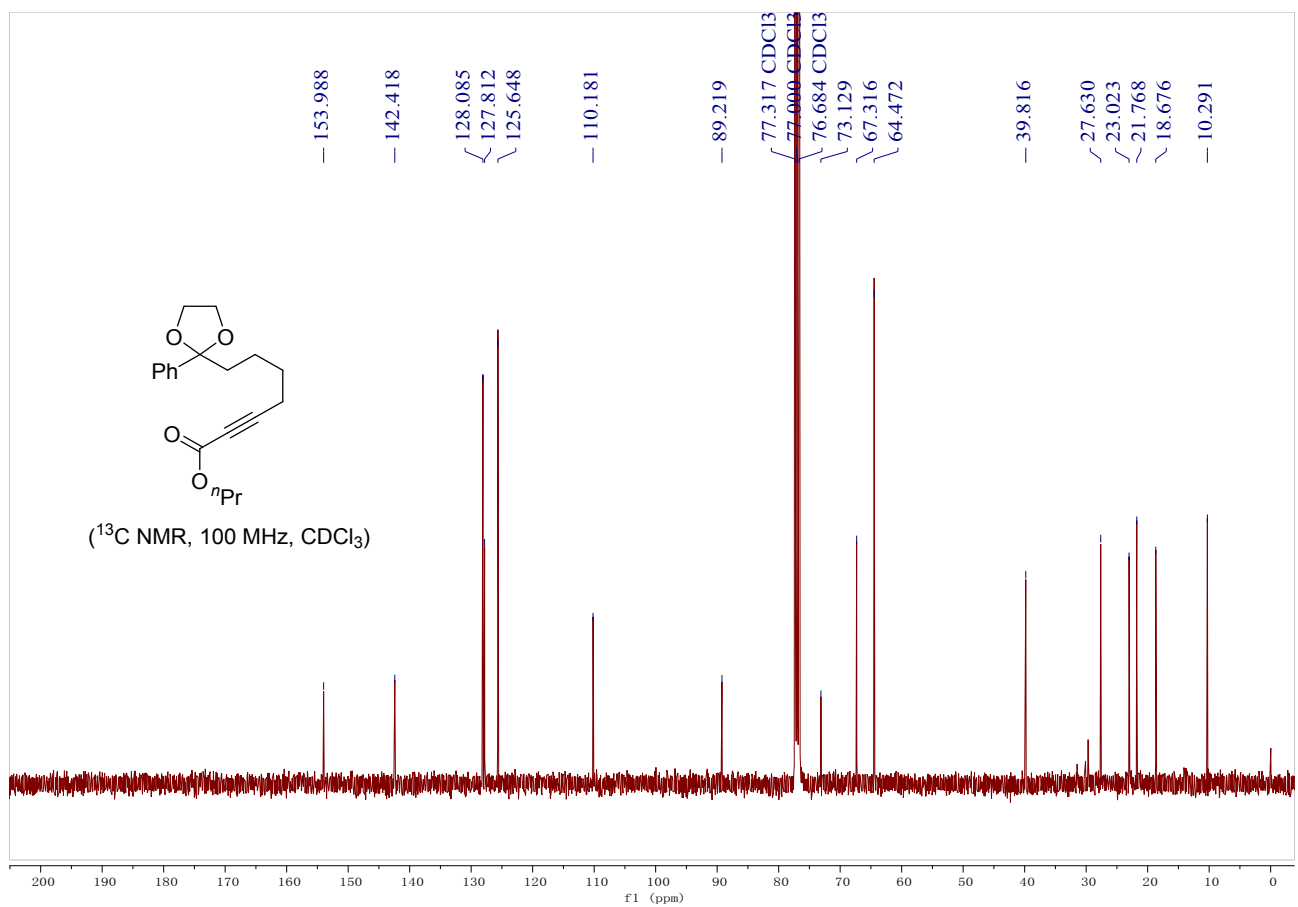

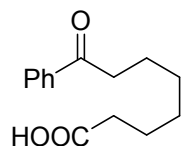

**8-Oxo-8-phenyloctanoic acid (11)**: colorless solid, m.p. 147-148 °C, 560 mg, 46%, Eluent: PE/EA = 1/1.

**<sup>1</sup>H NMR** (400 MHz, CDCl<sub>3</sub>, TMS): δ 7.99-7.93 (m, 2H), 7.59-7.52 (m, 1H), 7.46 (t, *J* = 7.6 Hz, 2H), 2.97 (t, *J* = 7.3 Hz, 2H), 2.36 (t, *J* = 7.5 Hz, 2H), 1.81-1.60 (m, 4H), 1.41 (p, *J* = 3.6 Hz, 4H).

**<sup>13</sup>C NMR** (150 MHz, CDCl<sub>3</sub>, TMS): δ 24.1, 24.5, 28.92, 28.86, 33.8, 38.4, 128.1, 128.6, 132.9, 137.0, 179.0, 200.4. **IR** (EtOH): ν 3292, 2923, 2853, 1711, 1676, 1636, 1447, 1408, 1244, 1188, 1008, 846, 723, 689, 669 cm<sup>-1</sup>. **HRMS** (ESI) *m/z*: [M+Na]<sup>+</sup> Calcd. for C<sub>14</sub>H<sub>18</sub>O<sub>3</sub>Na 257.1148; found 257.1156.

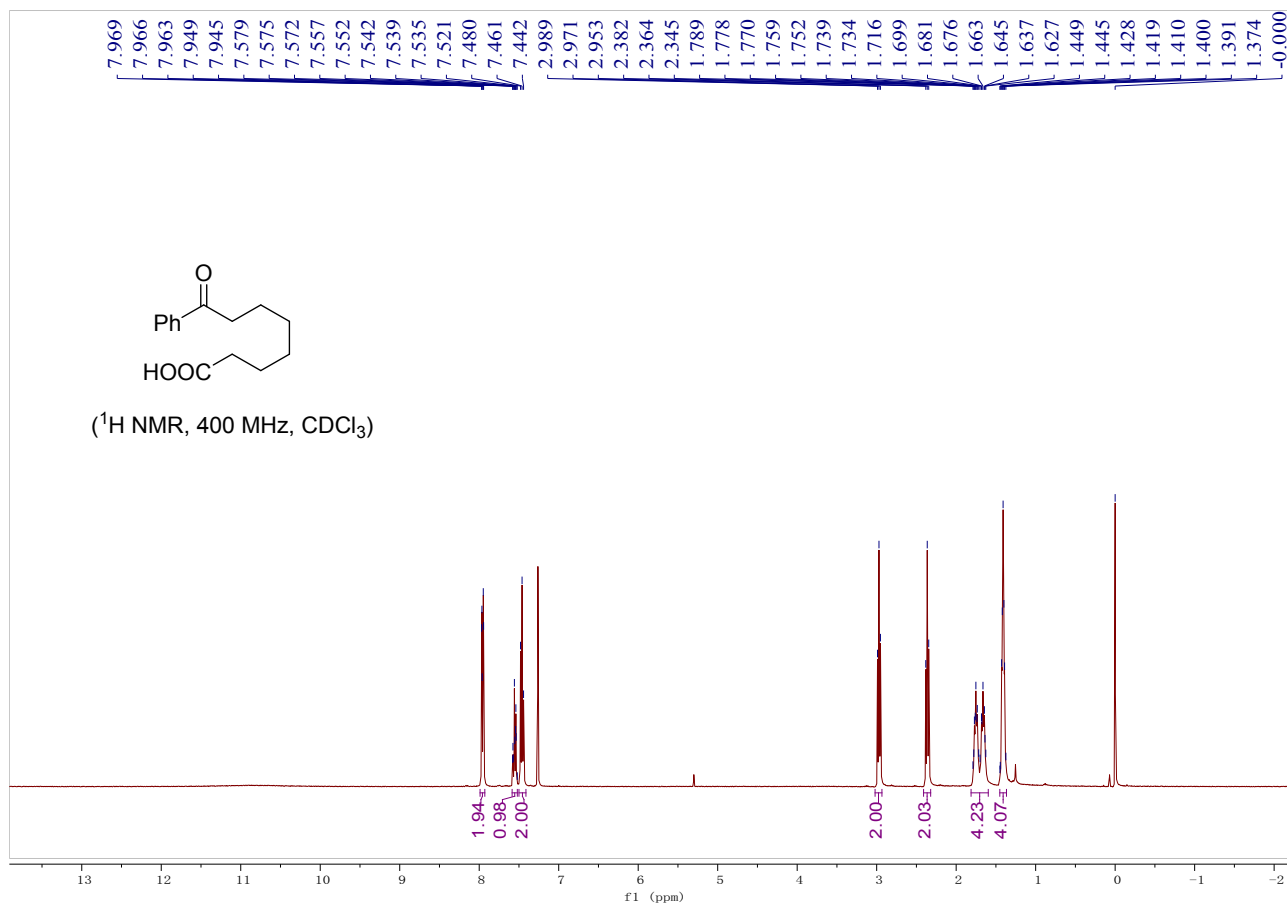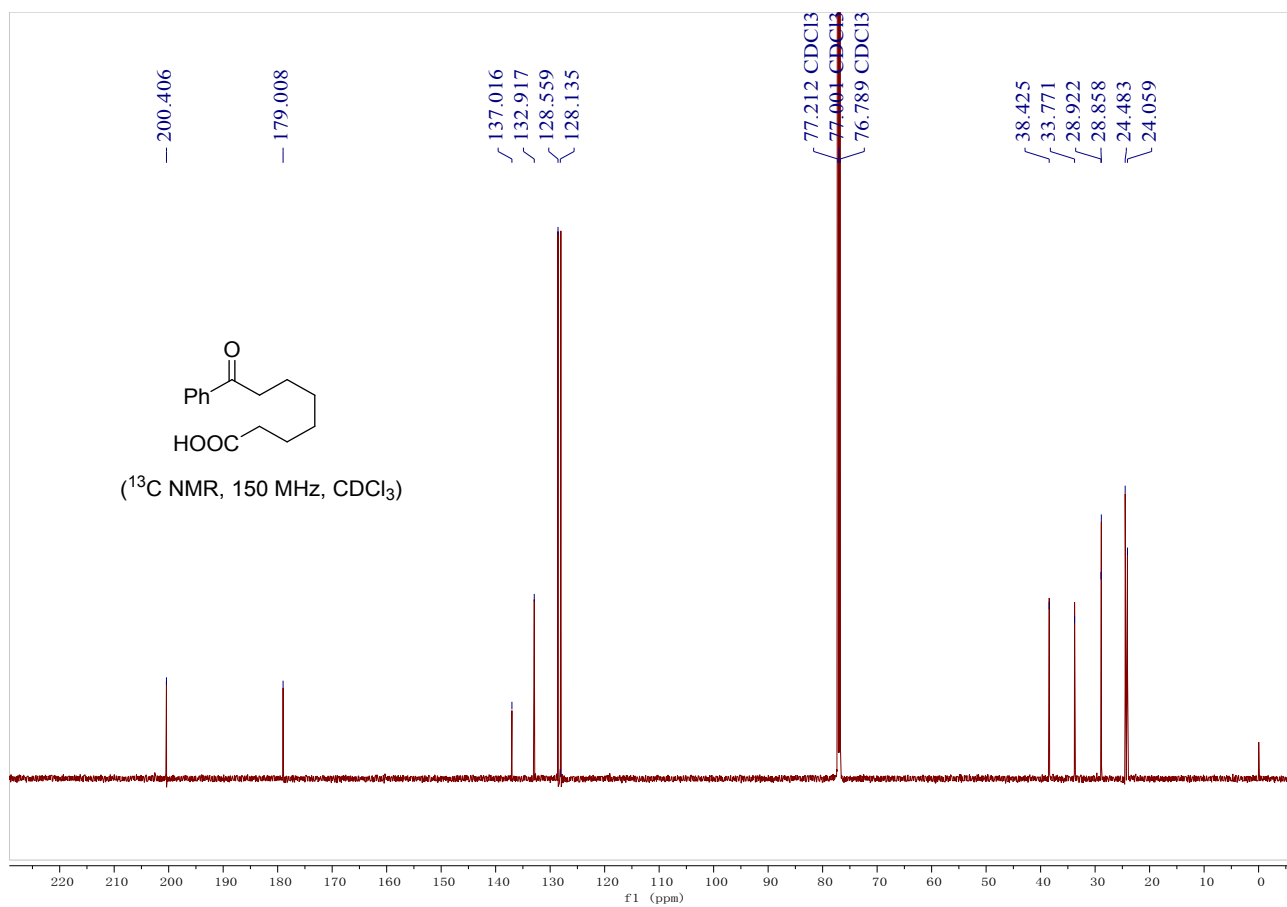

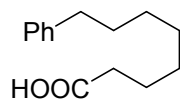

**8-Phenyloctanoic acid (12)** colorless oil, 492 mg, 43%, Eluent: PE/EA = 1/1.

**<sup>1</sup>H NMR** (600 MHz, CDCl<sub>3</sub>, TMS): δ 7.29-7.24 (m, 2H), 7.17 (dd, *J* = 6.6, 2.7 Hz, 3H), 2.60 (t, *J* = 7.7 Hz, 2H), 2.34 (t, *J* = 7.5 Hz, 2H), 1.67-1.57 (m, 4H), 1.37-1.31 (m, 6H). **<sup>13</sup>C NMR** (150 MHz, CDCl<sub>3</sub>, TMS): δ 24.6, 28.9, 29.06, 29.07, 31.4, 34.0, 35.9, 125.6, 128.2, 128.4, 142.8, 180.1. **IR** (EtOH): ν 3026, 2926, 2855, 1705, 1454, 1411, 1284, 1154, 1064, 935, 746, 697 cm<sup>-1</sup>. **HRMS** (EI) *m/z*: [M]<sup>+</sup> Calcd. for C<sub>14</sub>H<sub>20</sub>O<sub>2</sub> 220.1458; found 220.1454.



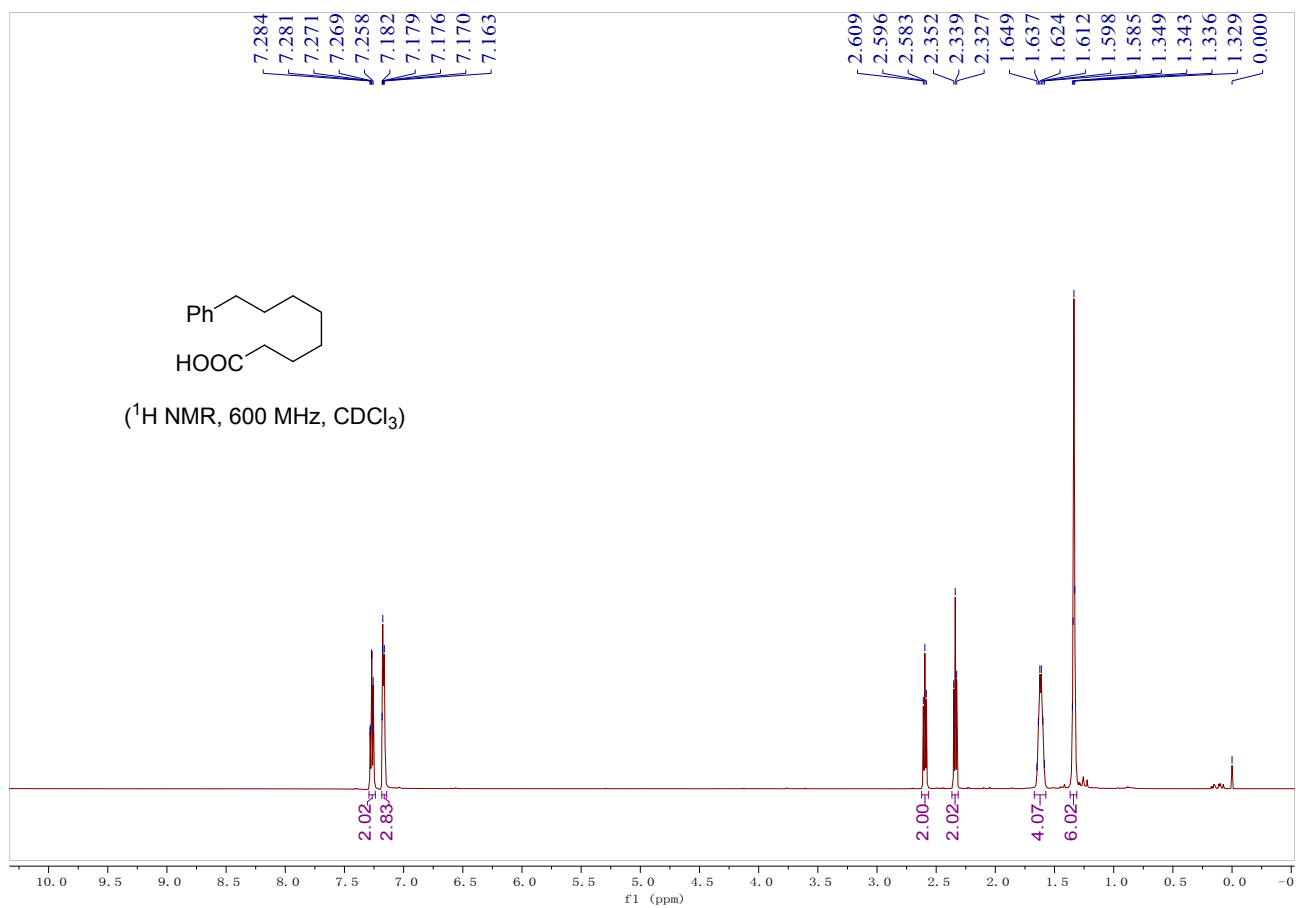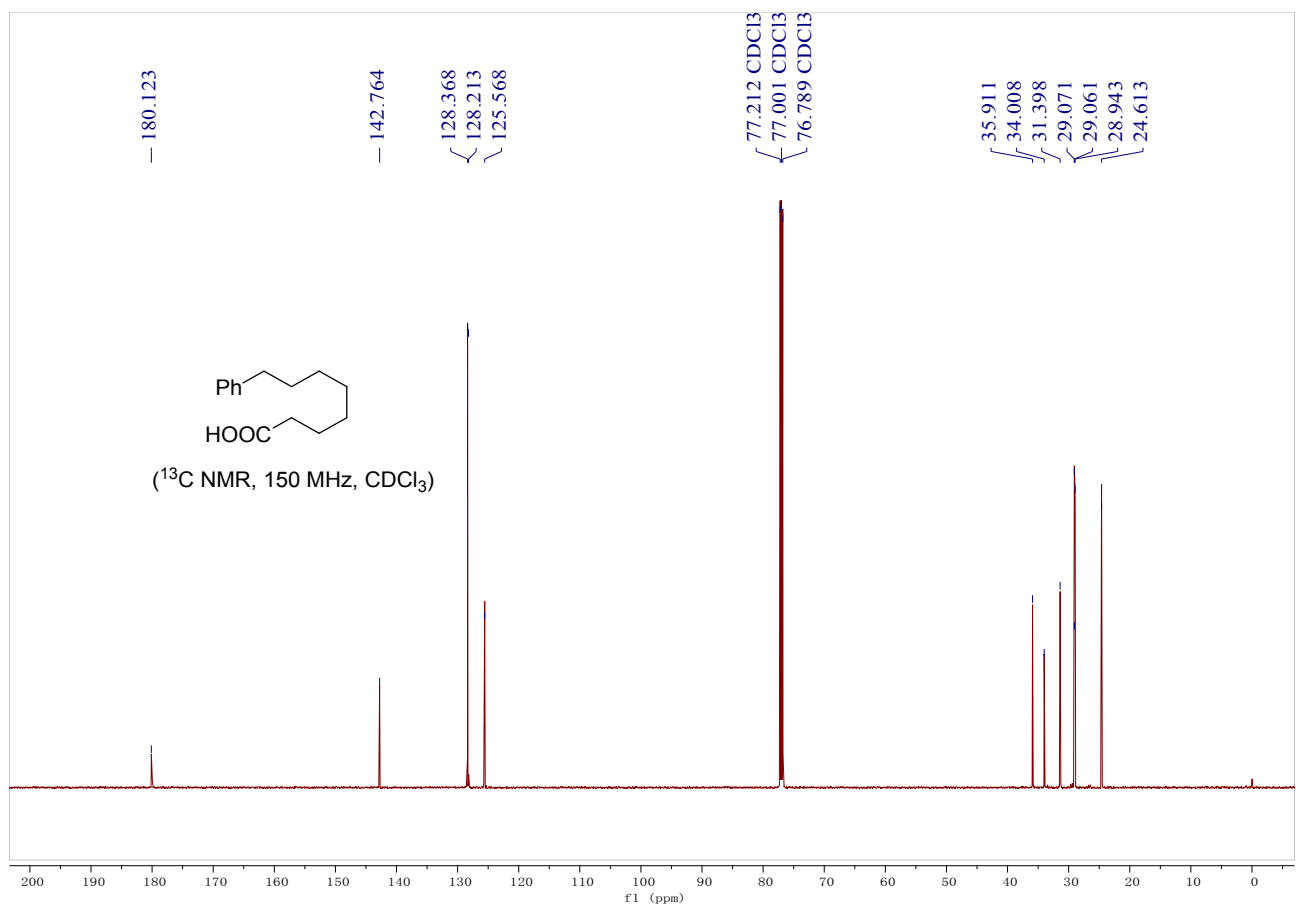

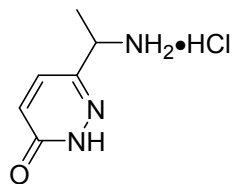

**6-(1-aminoethyl)pyridazin-3(2H)-one (S6):** grey solid, m.p. 267-269 °C, 1.8 g, Recrystallization.

**<sup>1</sup>H NMR** (600 MHz, DMSO-*d*<sub>6</sub>, TMS): δ 13.22 (s, 1H), 8.56 (s, 3H), 7.65 (d, *J* = 9.8 Hz, 1H), 6.99 (d, *J* = 9.8 Hz, 1H), 4.47-4.34 (m, 1H), 1.48 (d, *J* = 6.9 Hz, 3H). **<sup>13</sup>C NMR** (150 MHz, DMSO-*d*<sub>6</sub>, TMS): δ 17.7, 47.5, 129.9, 131.4, 143.9, 159.7. **IR** (EtOH): ν 3390, 3100, 2833, 2510, 1643, 1585, 1524, 1433, 1259, 1124, 1078, 1008, 843, 724, 668 cm<sup>-1</sup>. **HRMS** (ESI) *m/z*: [M]<sup>+</sup> Calcd. for C<sub>6</sub>H<sub>10</sub>N<sub>3</sub>O 140.0818; found 140.0814.

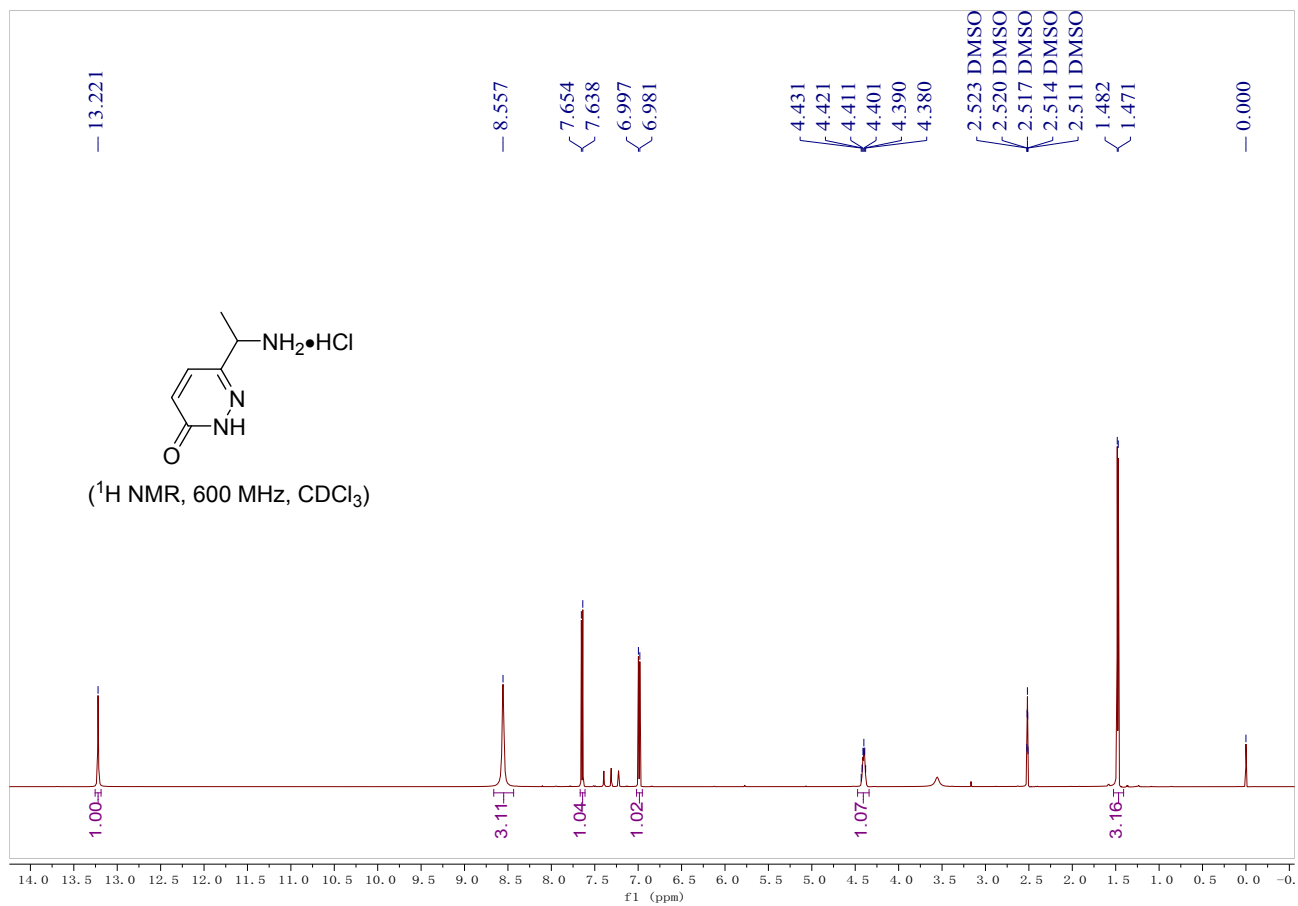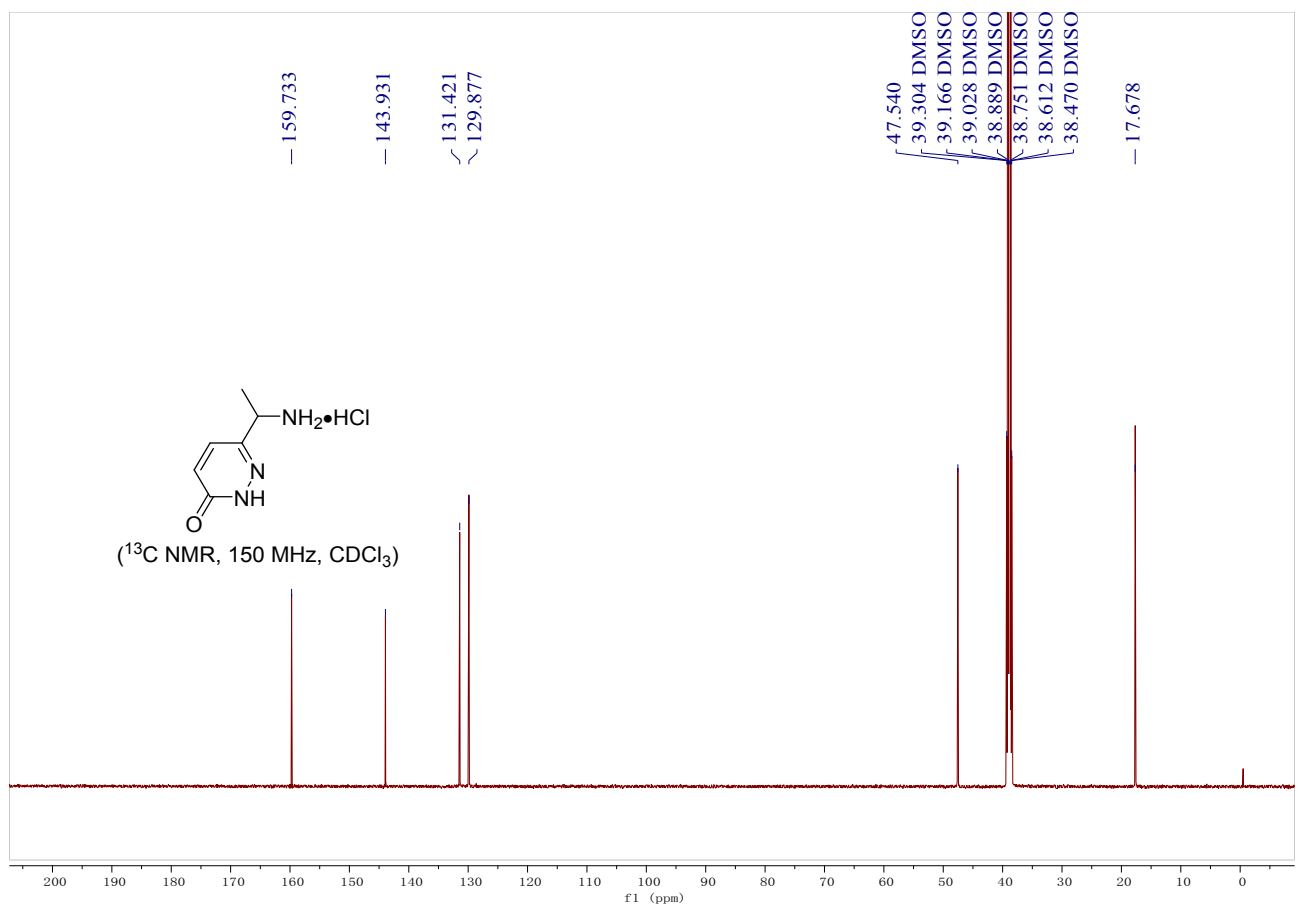

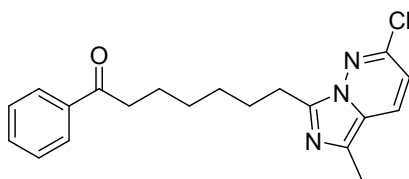

**7-(2-chloro-5-methylimidazo[1,5-*b*]pyridazin-7-yl)-1-phenylheptan-1-one (13)**: yellow oil, 678 mg, 64%, Eluent: PE/EA = 1/1.

**<sup>1</sup>H NMR** (600 MHz, CDCl<sub>3</sub>, TMS): δ 7.97-7.93 (m, 2H), 7.61 (d, *J* = 9.3 Hz, 1H), 7.58-7.51 (m, 1H), 7.45 (t, *J* = 7.8 Hz, 2H), 6.35 (d, *J* = 9.4 Hz, 1H), 3.11-3.01 (m, 2H), 2.96 (t, *J* = 7.4 Hz, 2H), 2.47 (s, 3H), 1.88-1.82 (m, 2H), 1.79-1.71 (m, 3H), 1.45 (p, *J* = 3.6 Hz, 3H). **<sup>13</sup>C NMR** (150 MHz, CDCl<sub>3</sub>, TMS): δ 12.9, 24.2, 25.7, 26.9, 29.0, 29.1, 38.5, 110.5, 119.4, 128.0, 128.5, 129.3, 132.8, 137.0, 142.2, 147.9, 200.5. **IR** (EtOH): ν 2924, 2854, 1684, 1612, 1478, 1449, 1408, 1295, 1098, 968, 777, 750, 731, 697 cm<sup>-1</sup>. **HRMS** (ESI) *m/z*: [M+H]<sup>+</sup> Calcd. for C<sub>20</sub>H<sub>23</sub>N<sub>3</sub>OCl 356.1524; found 356.1522.

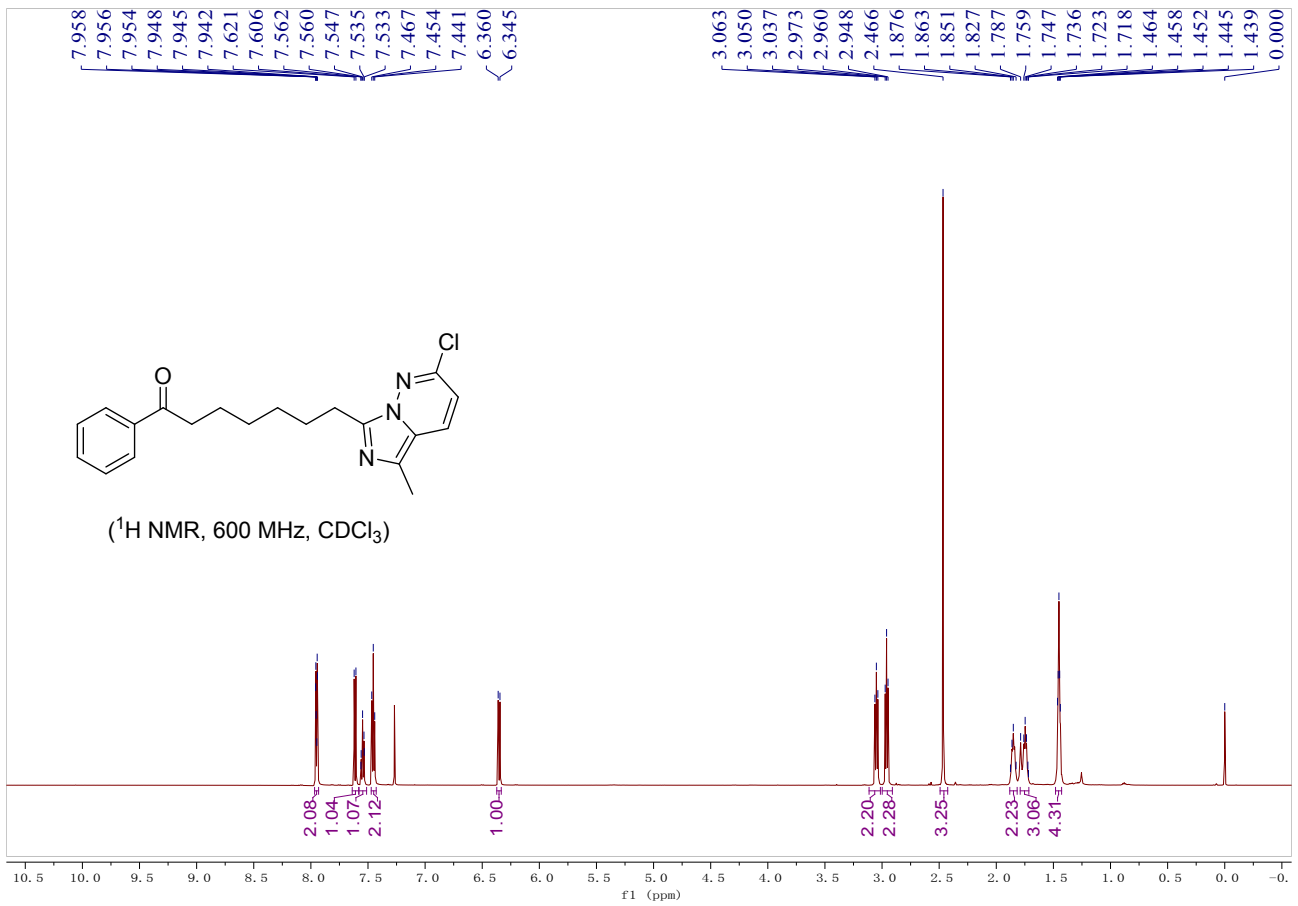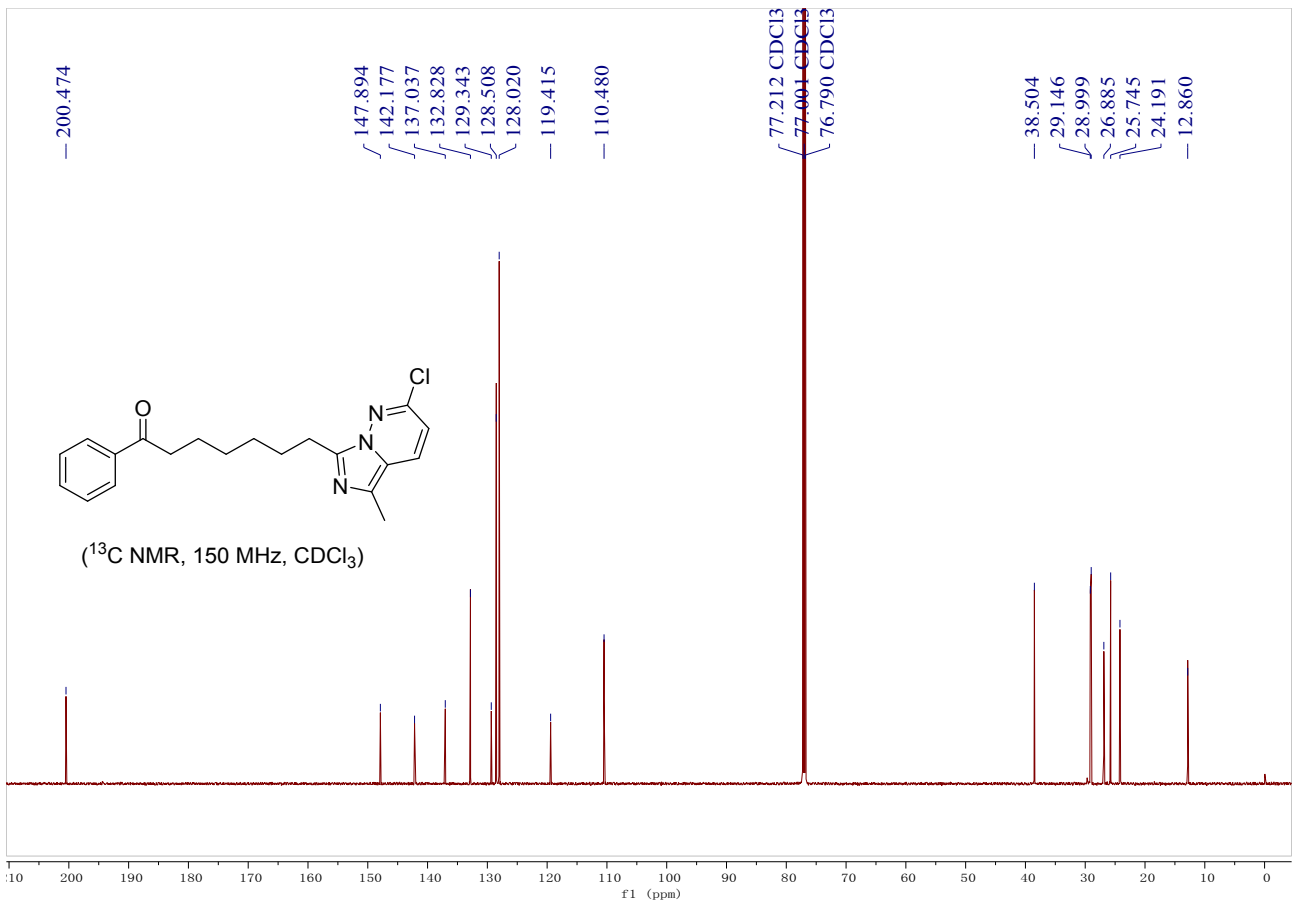

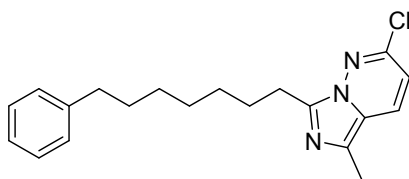

**2-chloro-5-methyl-7-(7-phenylheptyl)imidazo[1,5-b]pyridazine (14):** yellow oil, 636 mg, 62%,  
Eluent: PE/EA = 1/1.

**<sup>1</sup>H NMR** (600 MHz, CDCl<sub>3</sub>, TMS): δ 7.61 (d, *J* = 9.3 Hz, 1H), 7.29-7.23 (m, 2H), 7.17 (d, *J* = 6.2 Hz, 3H), 6.35 (d, *J* = 9.3 Hz, 1H), 3.05-3.01 (m, 2H), 2.62-2.57 (m, 2H), 2.47 (s, 3H), 1.84-1.79 (m, 2H), 1.63-1.57 (m, 4H), 1.40-1.32 (m, 4H). **<sup>13</sup>C NMR** (150 MHz, CDCl<sub>3</sub>, TMS): δ 12.9, 25.8, 27.0, 29.1, 29.2, 29.3, 31.5, 35.9, 110.5, 119.4, 125.5, 128.0, 128.2, 128.4, 129.4, 142.4, 142.9, 147.9. **IR** (EtOH): ν 2913, 2850, 1612, 1478, 1454, 1295, 1183, 1098, 967, 870, 776, 749, 698 cm<sup>-1</sup>. **HRMS** (ESI) *m/z*: [M+H]<sup>+</sup> Calcd. for C<sub>20</sub>H<sub>25</sub>N<sub>3</sub>Cl 342.1732; found 342.1733.

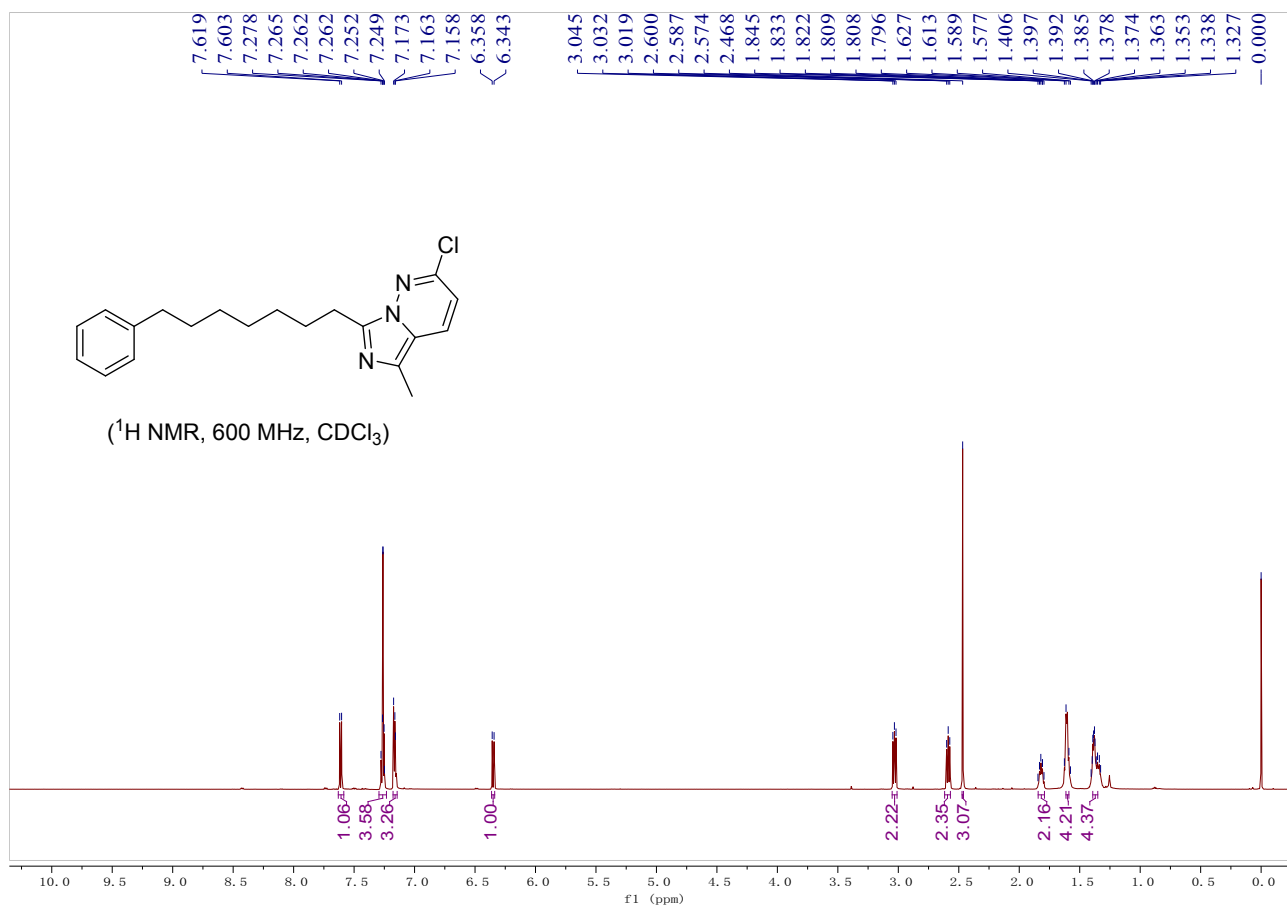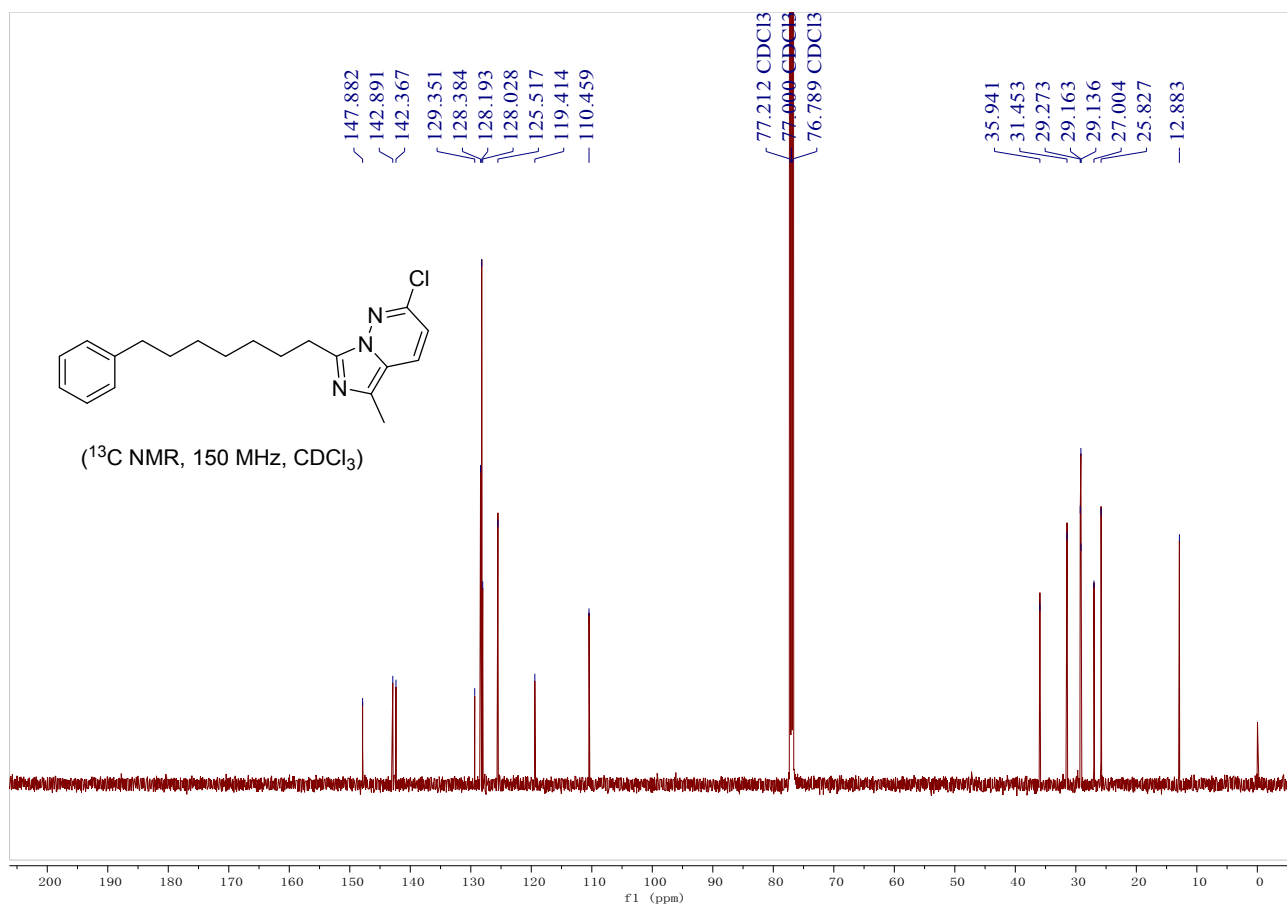

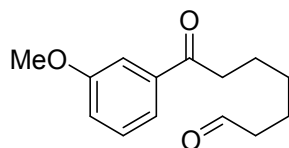

**7-(3-methoxyphenyl)-7-oxoheptanal (15)**: colorless oil, 690 mg, 59%, Eluent: PE/EA = 20/1.

**<sup>1</sup>H NMR** (400 MHz, CDCl<sub>3</sub>, TMS): δ 9.77 (s, 1H), 7.57-7.45 (m, 2H), 7.37 (t, *J* = 8.0 Hz, 1H), 7.10 (dd, *J* = 8.2, 2.6 Hz, 1H), 3.85 (s, 3H), 2.97 (t, *J* = 7.2 Hz, 2H), 2.52-2.42 (m, 2H), 1.81-1.64 (m, 4H), 1.47-1.37 (m, 2H). **<sup>13</sup>C NMR** (100 MHz, CDCl<sub>3</sub>, TMS): δ 21.8, 23.9, 28.7, 38.2, 43.6, 55.3, 112.2, 119.3, 120.6, 129.5, 138.3, 159.7, 199.8, 202.5. **IR** (EtOH): ν 3098, 2967, 2940, 1748, 1682, 1587, 1467, 1267, 1189, 1060, 867, 789, 689, 668 cm<sup>-1</sup>. **HRMS** (EI) *m/z*: [M]<sup>+</sup> Calcd. for C<sub>14</sub>H<sub>18</sub>O<sub>3</sub> 234.1250; found 234.1248.



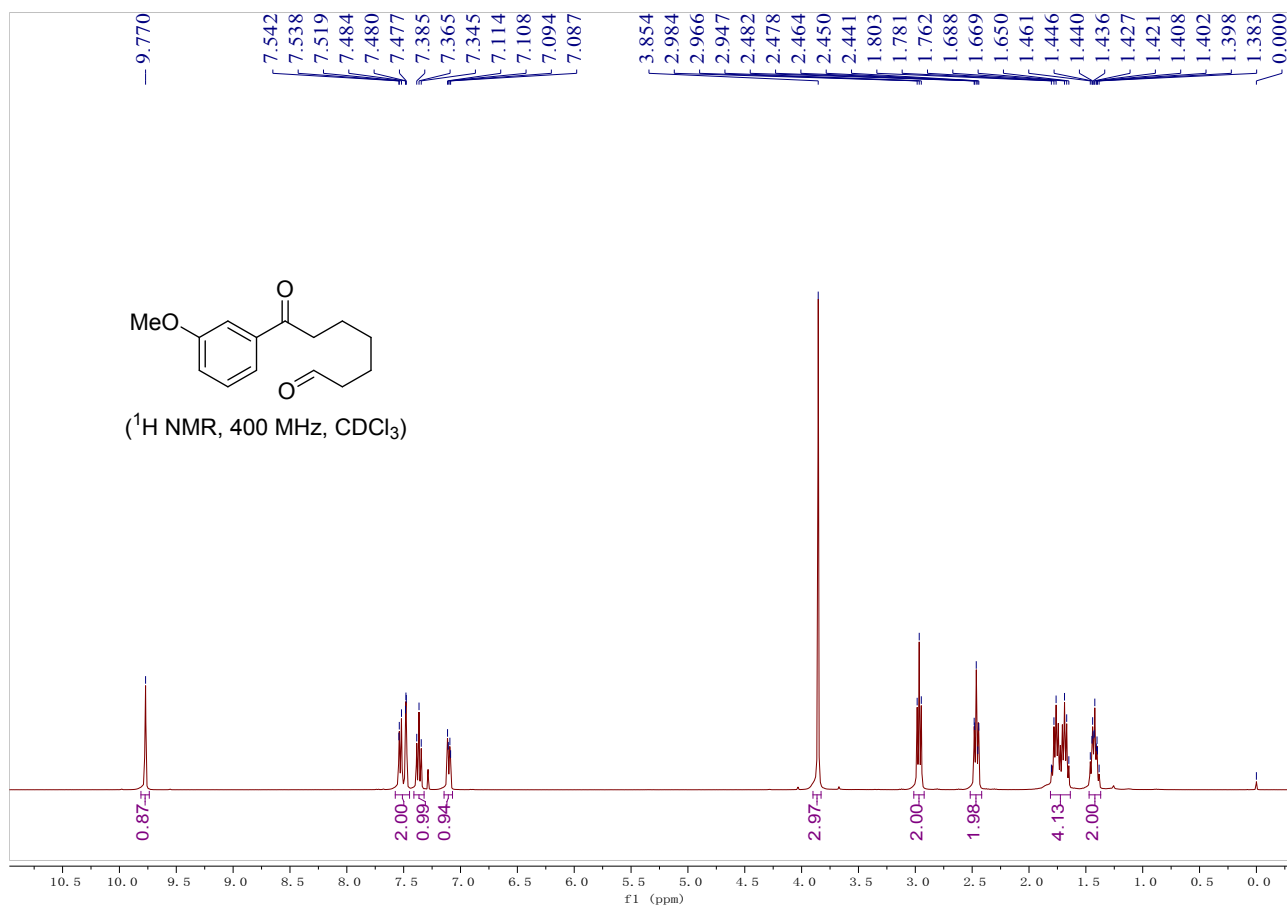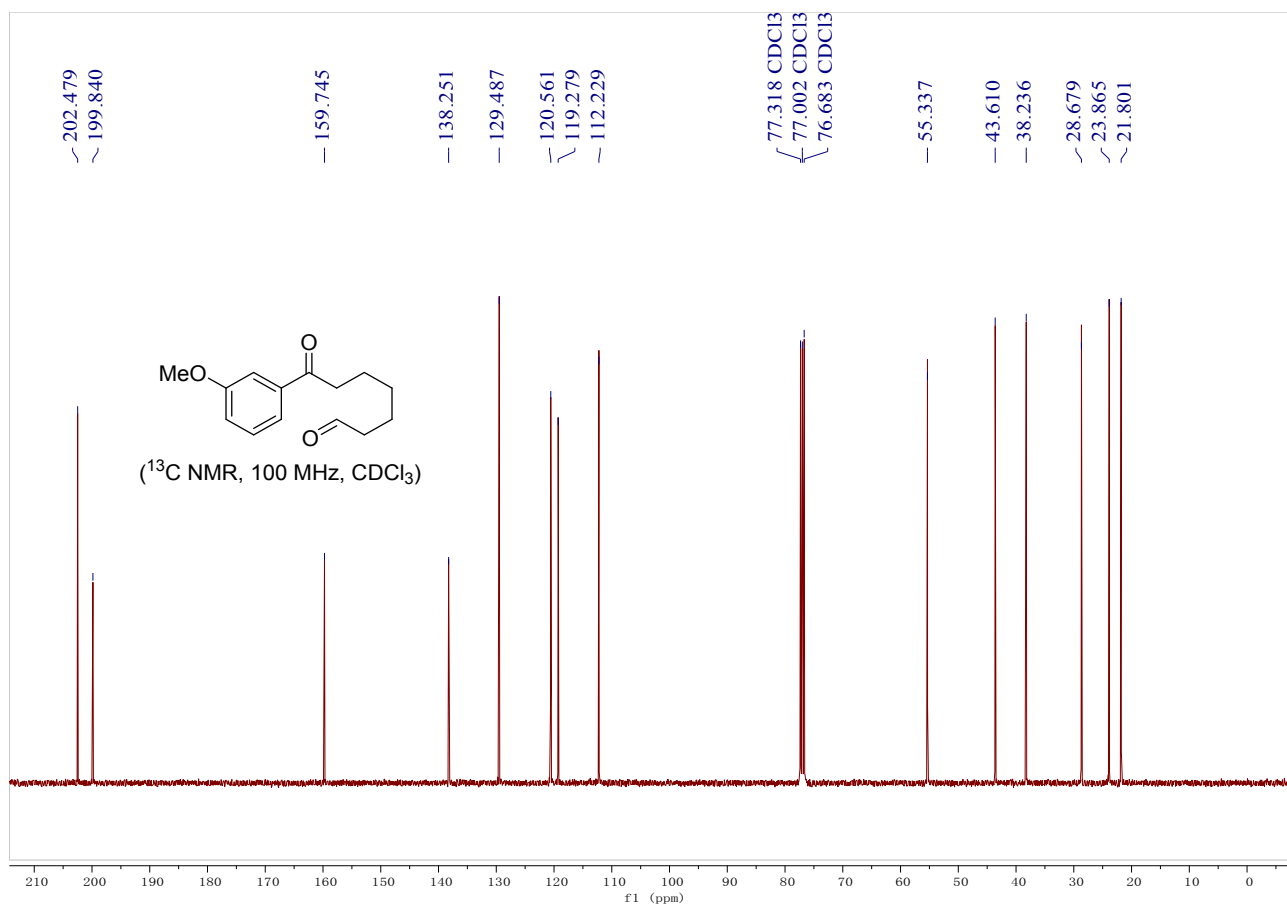

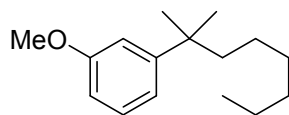

**1-Methoxy-3-(2-methyloctan-2-yl)benzene (S7):** colorless oil, 1.0 g, 90%, Eluent: PE/EA = 20/1. **<sup>1</sup>H NMR** (400 MHz, CDCl<sub>3</sub>, TMS): δ 7.22 (t, *J* = 8.0 Hz, 1H), 6.96-6.85 (m, 2H), 6.71 (dd, *J* = 8.2, 2.6 Hz, 1H), 3.80 (s, 3H), 1.60-1.54 (m, 2H), 1.27 (s, 6H), 1.24-1.15 (m, 6H), 1.05 (dt, *J* = 8.8, 4.8 Hz, 2H), 0.84 (t, *J* = 6.8 Hz, 3H). **<sup>13</sup>C NMR** (150 MHz, CDCl<sub>3</sub>, TMS): δ 14.1, 22.7, 24.6, 29.0, 30.0, 31.8, 37.7, 44.6, 55.1, 109.7, 112.6, 118.4, 128.8, 151.7, 159.3. **IR** (EtOH): ν 2988, 2975, 2842, 1507, 1454, 1380, 1277, 1087, 1045, 880, 759, 683, 665 cm<sup>-1</sup>. **HRMS** (EI) *m/z*: [M]<sup>+</sup> Calcd. for C<sub>16</sub>H<sub>26</sub>O 234.1978; found 234.1980.

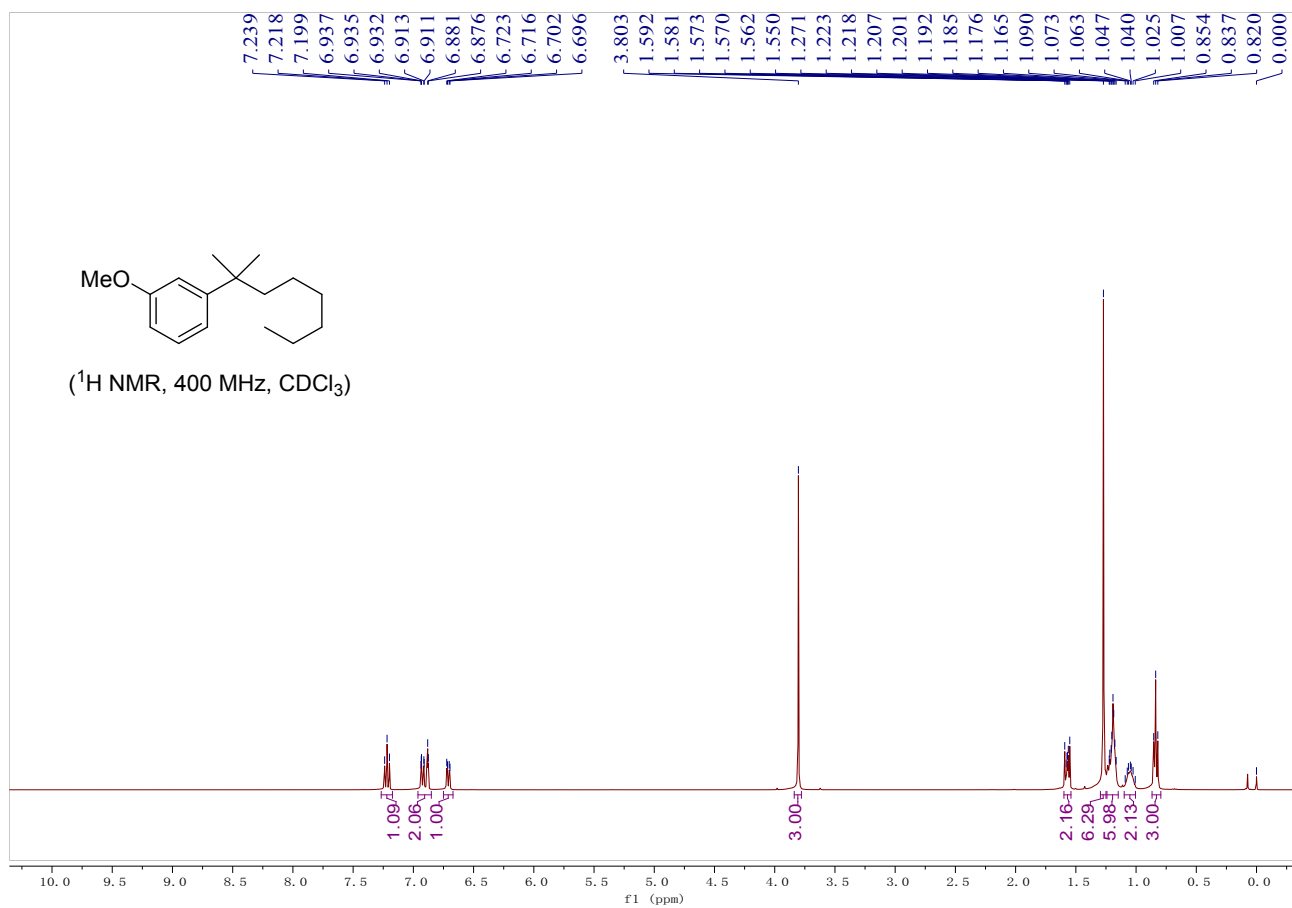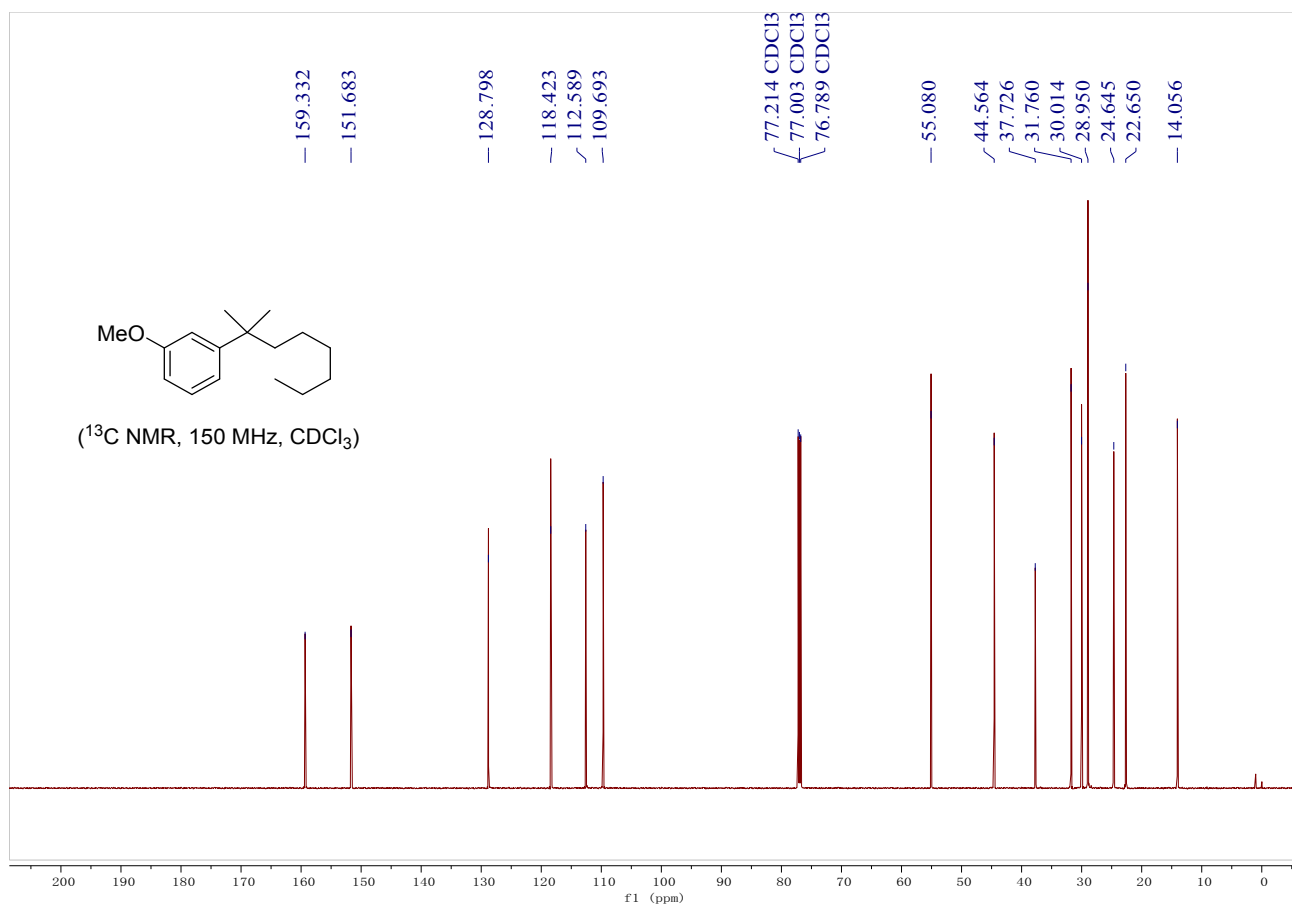

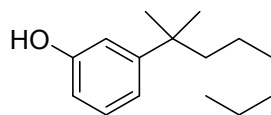

**3-(2-methyloctan-2-yl)phenol (16)**: colorless oil, 627 mg, 79%, Eluent: PE/EA = 4/1.

**<sup>1</sup>H NMR** (400 MHz, CDCl<sub>3</sub>, TMS): δ 7.15 (t, *J* = 8.0 Hz, 1H), 6.93-6.86 (m, 1H), 6.81 (t, *J* = 2.2 Hz, 1H), 6.63 (dd, *J* = 8.0, 2.6 Hz, 1H), 3.96 (s, 1H), 1.60-1.50 (m, 2H), 1.28-1.16 (m, 12H), 1.08-0.99 (m, 2H), 0.84 (t, *J* = 6.8 Hz, 3H). **<sup>13</sup>C NMR** (150 MHz, CDCl<sub>3</sub>, TMS): δ 14.0, 22.6, 24.6, 28.9, 30.0, 31.8, 37.6, 44.5, 112.1, 113.1, 118.4, 129.0, 152.1, 155.2. **IR** (EtOH): ν 3330, 2957, 2928, 2870, 1587, 1452, 1215, 1166, 1078, 914, 872, 780, 701 cm<sup>-1</sup>. **HRMS** (ESI) *m/z*: [M]<sup>+</sup> Calcd. for C<sub>15</sub>H<sub>23</sub>O 219.1749; found 219.1748.

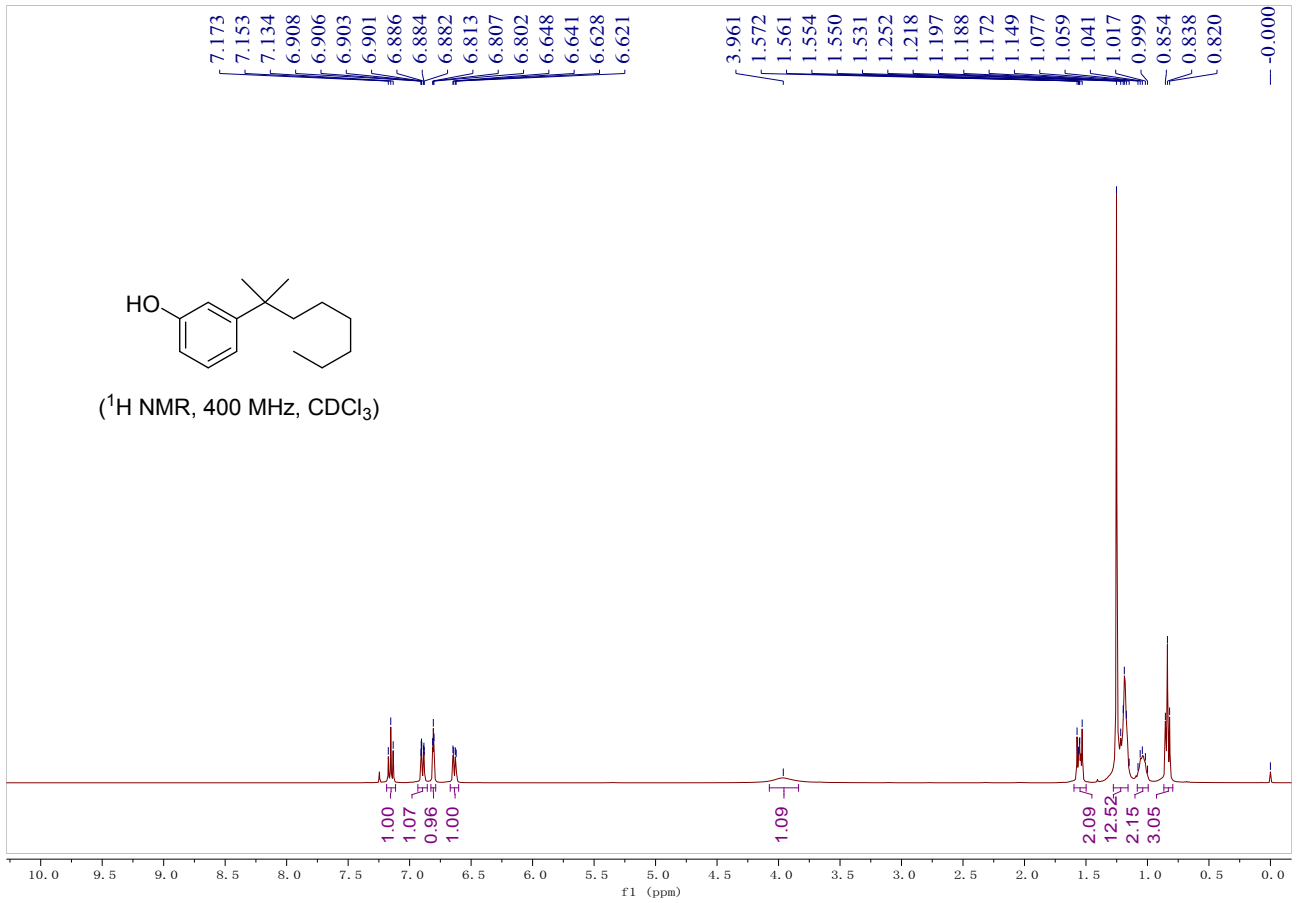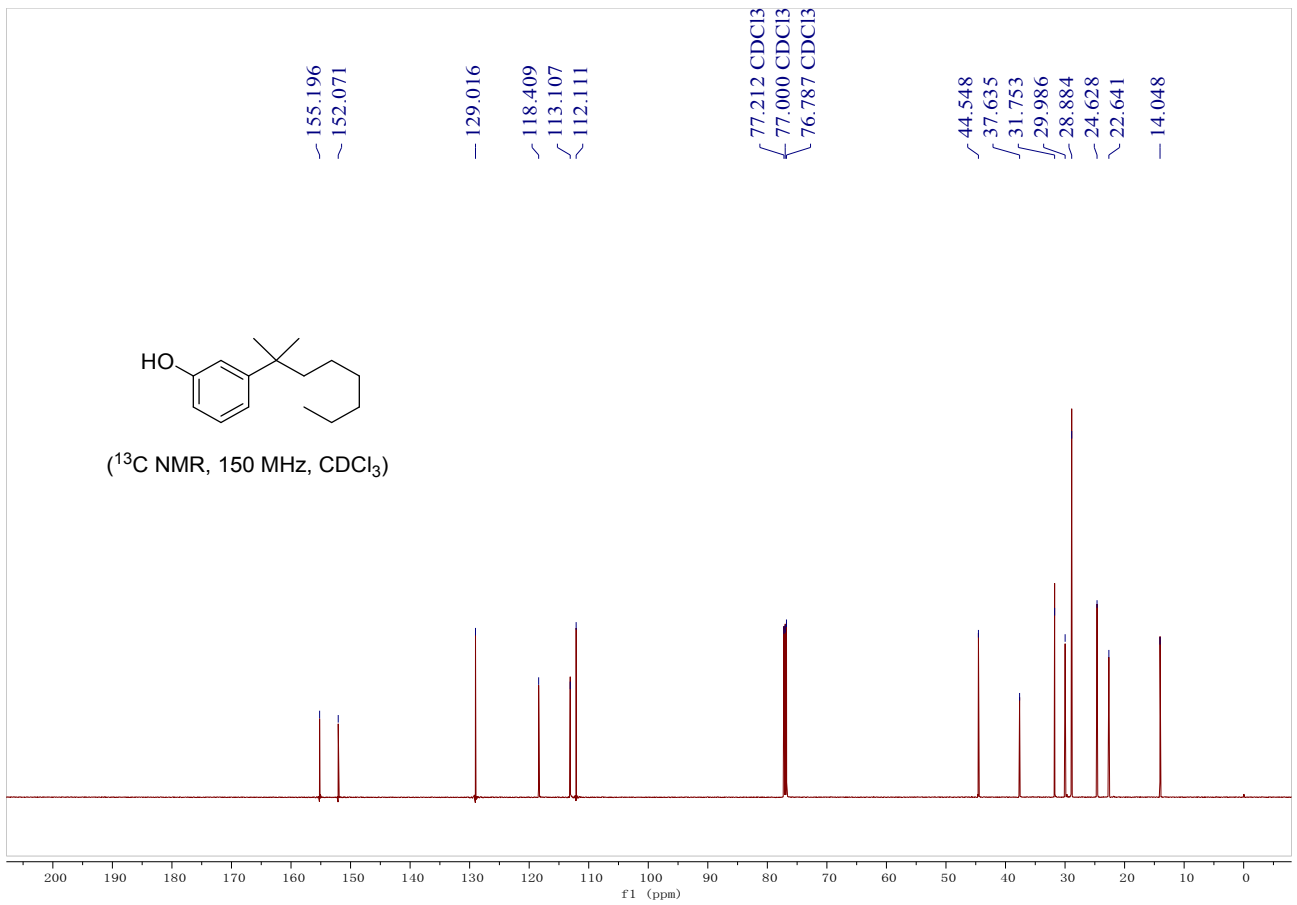

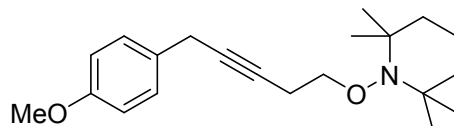

**1-((5-(4-methoxyphenyl)pent-3-yn-1-yl)oxy)-2,2,6,6-tetramethylpiperidine (17):** colorless oil, 16 mg, 49%, Eluent: PE/EA = 20/1.

**<sup>1</sup>H NMR** (600 MHz, CDCl<sub>3</sub>, TMS): δ 7.25 (d, *J* = 8.6 Hz, 3H), 6.84 (d, *J* = 8.6 Hz, 2H), 3.85 (t, *J* = 7.2 Hz, 2H), 3.79 (s, 3H), 3.51 (t, *J* = 2.4 Hz, 2H), 2.43 (tt, *J* = 7.2, 2.4 Hz, 2H), 1.58-1.50 (m, 1H), 1.48-1.42 (m, 4H), 1.33-1.27 (m, 1H), 1.17 (s, 6H), 1.10 (s, 6H). **<sup>13</sup>C NMR** (150 MHz, CDCl<sub>3</sub>, TMS): δ 17.1, 18.8, 20.1, 24.2, 33.0, 39.6, 55.3, 59.8, 74.9, 78.6, 79.4, 113.8, 128.8, 129.4, 158.2. **IR** (EtOH): ν 2960, 2927, 2857, 2823, 2218, 1587, 1488, 1452, 1217, 1167, 1046, 911, 861, 783, 673, 666 cm<sup>-1</sup>. **HRMS** (ESI) *m/z*: [M+H]<sup>+</sup> Calcd. for C<sub>21</sub>H<sub>32</sub>O<sub>2</sub>N 330.2428; found 330.2427.

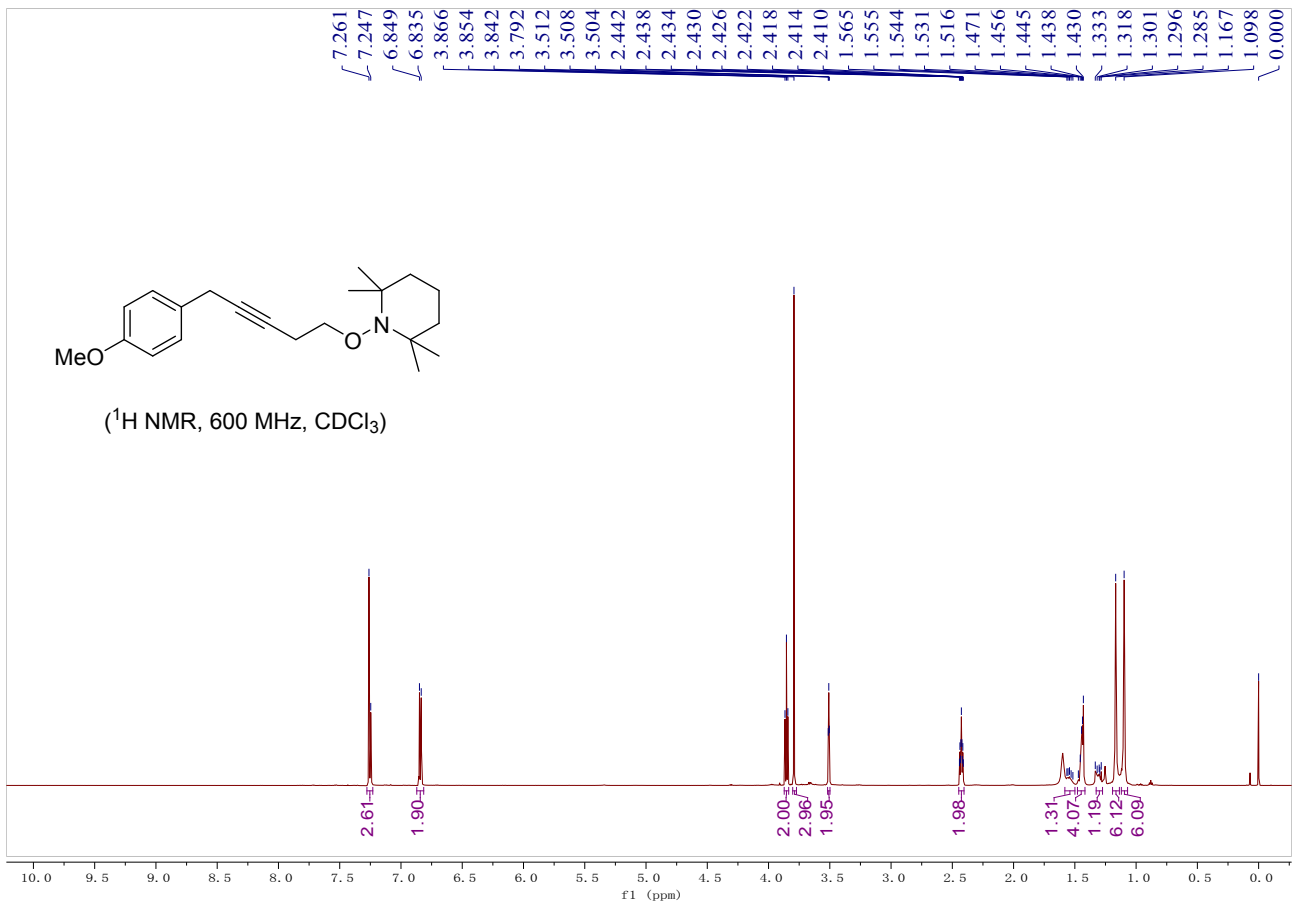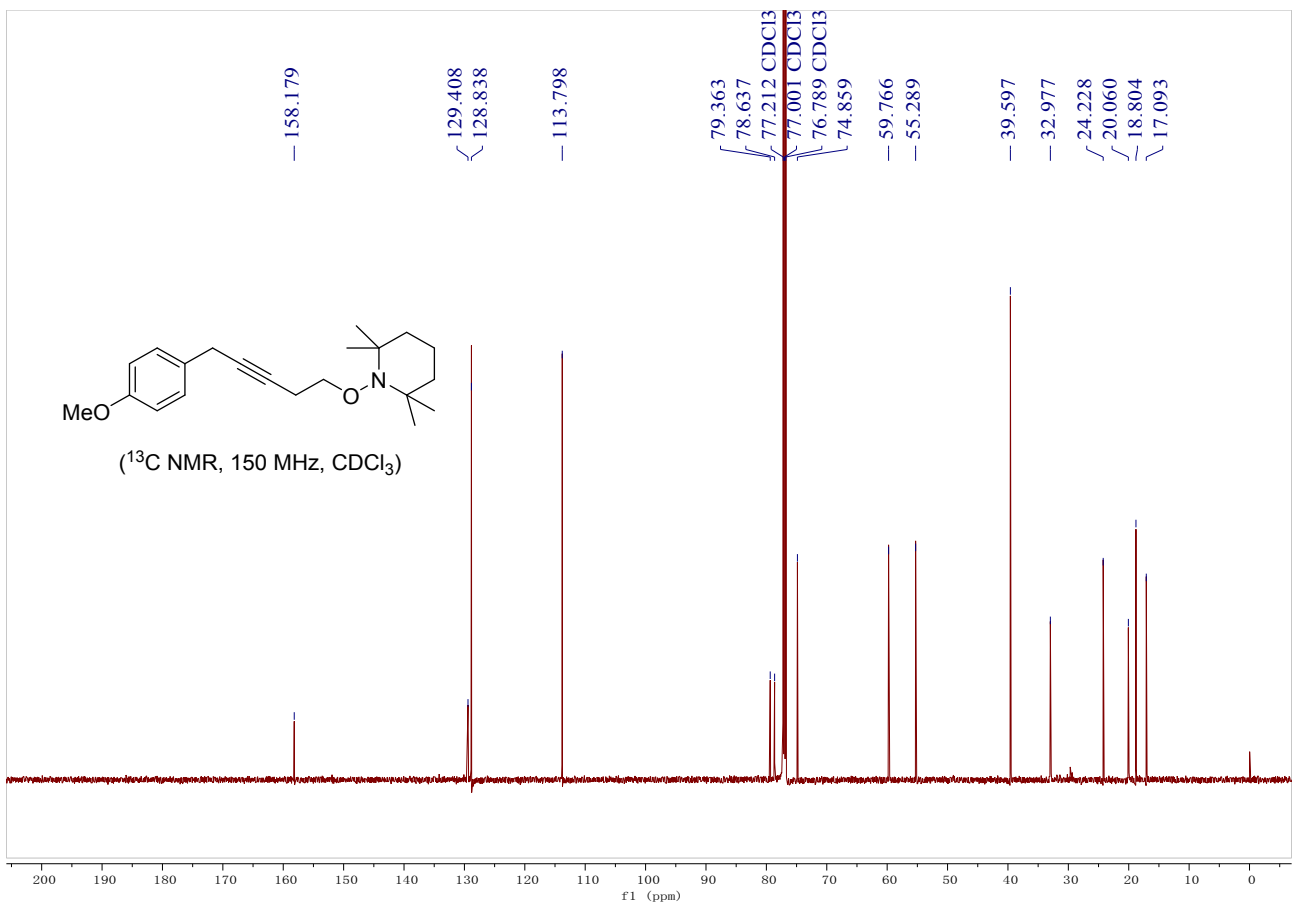

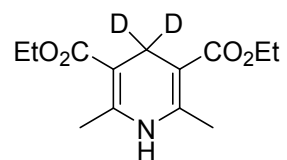

**Diethyl 2,6-dimethyl-1,4-dihydropyridine-3,5-dicarboxylate-4,4- $d_2$  (2af):** yellow solid, 408 mg, 50%.

**$^1\text{H}$  NMR** (400 MHz,  $\text{DMSO-}d_6$ , TMS):  $\delta$  8.28 (s, 1H), 4.06 (q,  $J = 7.2$  Hz, 4H), 2.12 (s, 6H), 1.19 (t,  $J = 7.2$  Hz, 6H).



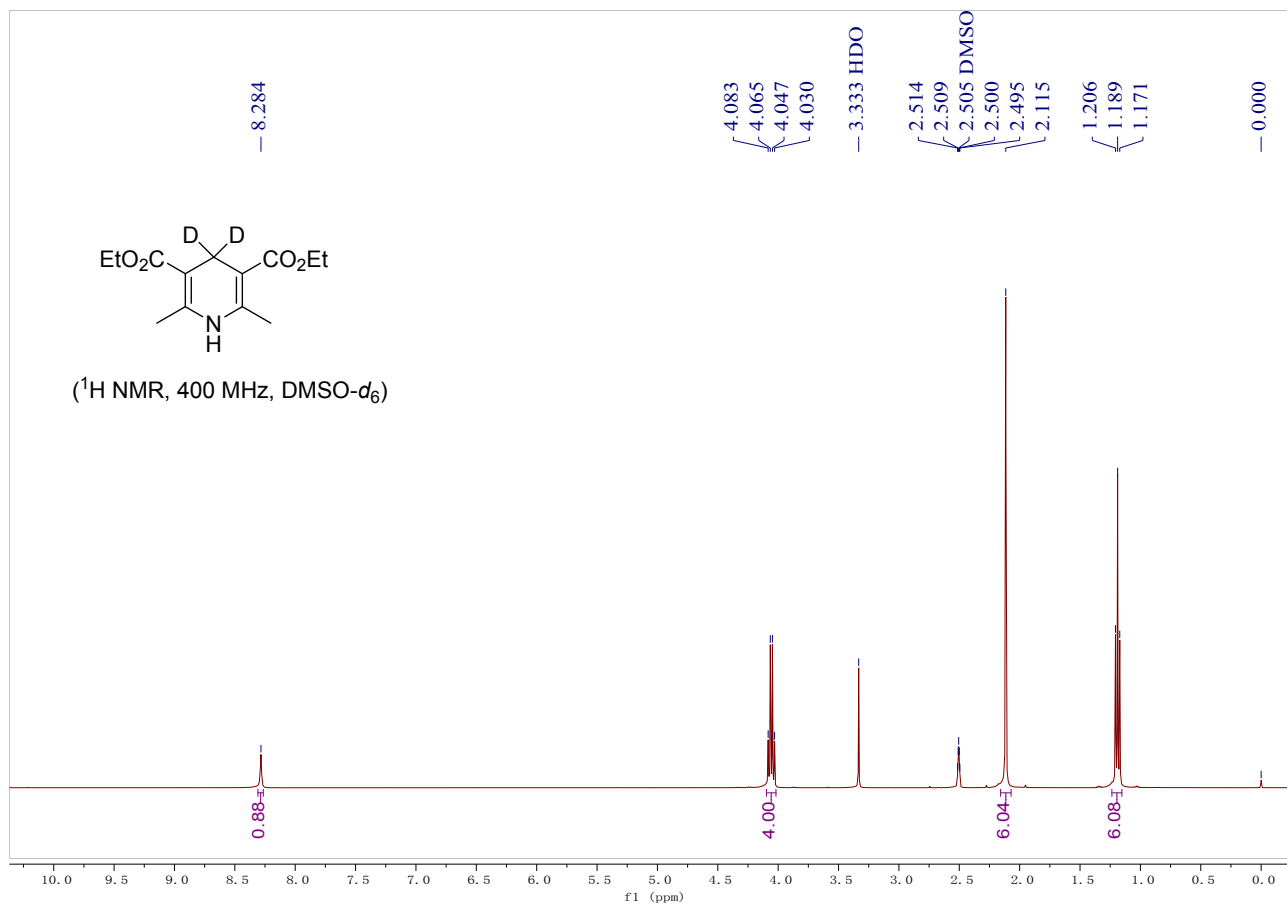

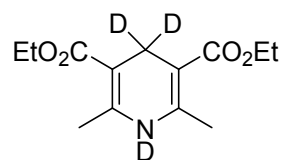

**Diethyl 2,6-dimethyl-1,4-dihydropyridine-3,5-dicarboxylate-1,4,4-*d*<sub>3</sub> (2ag)**: pale green solid, 93 mg, 95%.

**<sup>1</sup>H NMR** (400 MHz, CDCl<sub>3</sub>, TMS): δ 4.17 (q, *J* = 7.2 Hz, 3H), 2.19 (s, 6H), 1.29 (t, *J* = 7.2 Hz, 6H).

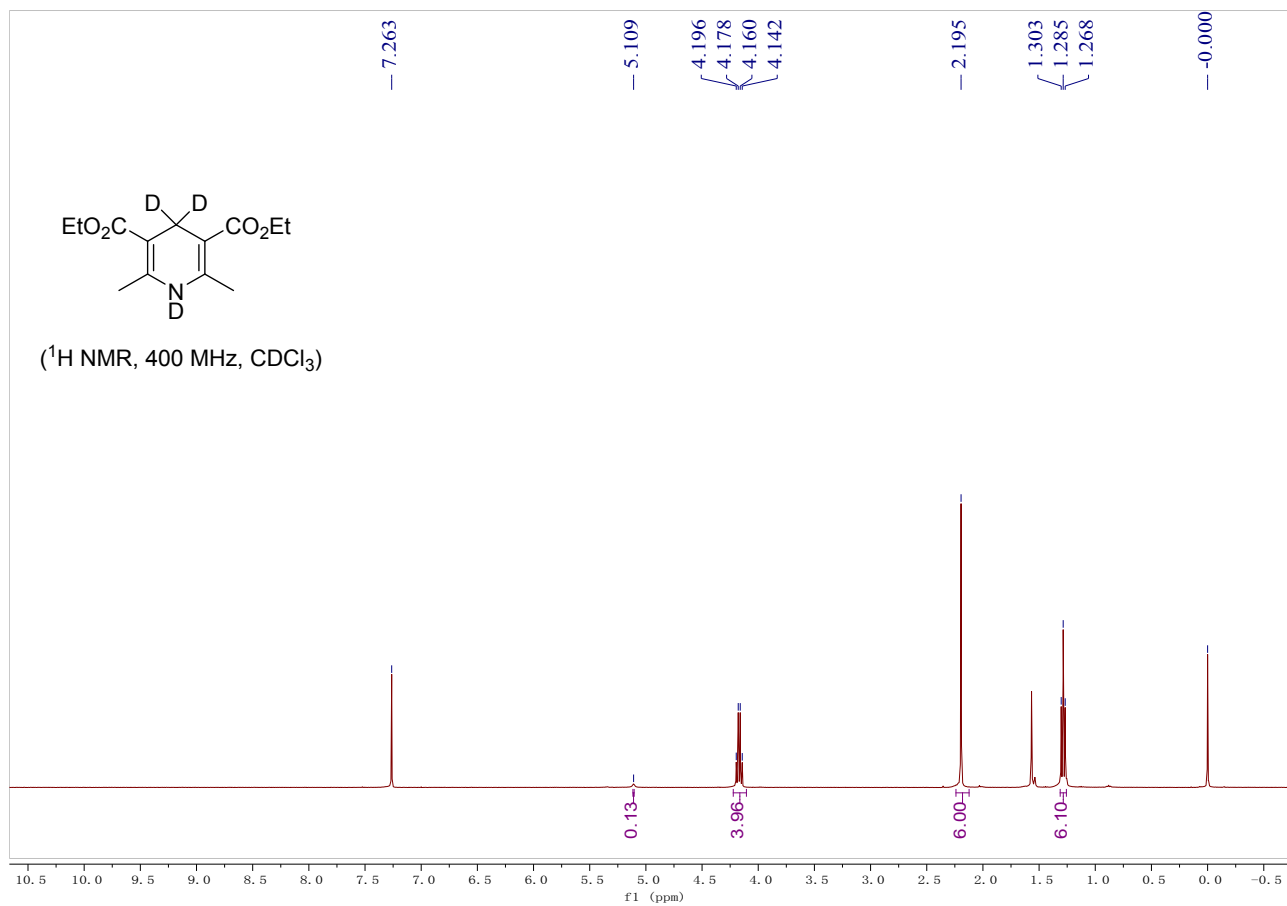

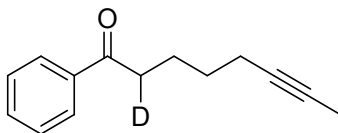

**1-phenyloct-6-yn-1-one-2-d (*d*<sub>1</sub>-3ba)**: colorless oil, 16 mg, 80%, Eluent: PE/EA = 20/1.

**<sup>1</sup>H NMR** (400 MHz, CDCl<sub>3</sub>, TMS): δ 8.00-7.94 (m, 2H), 7.59-7.53 (m, 1H), 7.51-7.42 (m, 2H), 3.00 (t, *J* = 7.4 Hz, 1.18H), 2.19 (tq, *J* = 7.2, 2.6 Hz, 2H), 1.90-1.80 (m, 2H), 1.77 (t, *J* = 2.6 Hz, 3H), 1.63-1.54 (m, 2H).

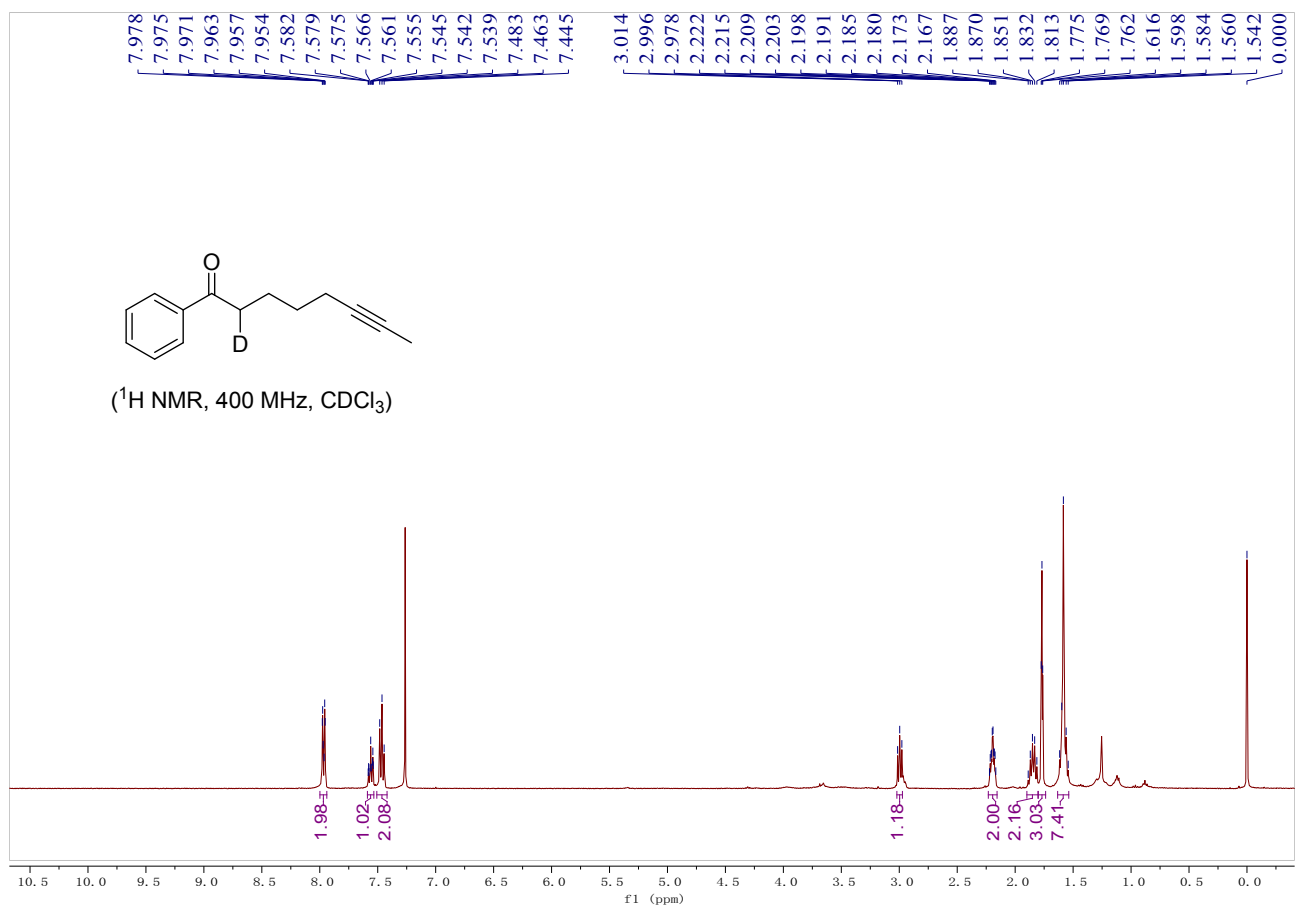

## 8. References

1. Lan, Y., Yang, C., Xu, Y.-H. & Loh, T.-P. Direct coupling of  $sp^3$  carbon of alkanes with  $\alpha,\beta$ -unsaturated carbonyl compounds using a copper/hydroperoxide system. *Org. Chem. Front.* **4**, 1411-1415 (2017). doi:10.1039/c7qo00149e
2. Zhao, Q.-Q., Zhou, X.-S., Xu, S.-H., Wu, Y.-L., Xiao, W.-J. & Chen, J.-R. Visible-light-driven nitrogen radical-catalyzed [3+2] cyclization of vinylcyclopropanes and *N*-tosyl vinylaziridines with alkenes. *Org. Lett.* **22**, 2470-2475 (2020). doi:10.1021/acs.orglett.0c00712
3. Nanteuil, F. de. & Waser, J. Synthesis of aminocyclobutanes by iron-catalyzed [2+2] cycloaddition. *Angew. Chem. Int. Ed.* **52**, 9009-9013 (2013). doi:10.1002/anie.201303803
4. Zhang, X., Jones - Mensah, E., Deobald, J. & Magolan, J. Alkylation of indoles with  $\alpha,\beta$ -unsaturated ketones using alumina in hexanes. *Adv. Syn. Catal.* **361**, 5548-5551 (2019). doi:10.1002/adsc.201901037
5. Luo, Y., Roy, I. D., Madec, A. G. & Lam, H. W. Enantioselective synthesis of allylboronates and allylic alcohols by copper-catalyzed 1,6-boration. *Angew. Chem. Int. Ed.* **53**, 4186-4190 (2014). doi:10.1002/anie.201310380
6. Zhang, Y.-H., Zhang, W.-W., Zhang, Z.-Y., Zhao, K. & Loh, T.-P. Manganese-catalyzed ring-opening coupling reactions of cyclopropanols with enones. *Org. Lett.* **21**, 5101-5105 (2019). doi:10.1021/acs.orglett.9b01703
7. Allais, C., Liéby-Muller, F., Rodriguez, J. & Constantieux, T. Metal-free michael-addition-initiated three-component reaction for the regioselective synthesis of highly functionalized pyridines: scope, mechanistic investigations and applications. *Eur. J. Org. Chem.* **2013**, 4131-4145 (2013). doi:10.1002/ejoc.201300246
8. Bugarin, A., Jones, K.-D. & Connell, B.-T. Efficient, direct alpha-methylenation of carbonyls mediated by diisopropylammonium trifluoroacetate. *Chem. Commun.* **46**, 1715-1717 (2010). doi:10.1039/b924577d
9. Dong, X.-Y., Zhang, Y.-F., Ma, C.-L., Gu, Q.-S., Wang, F.-L., Li, Z.-L., Jiang, S.-P. & Liu, X.-Y. A general asymmetric copper-catalysed Sonogashira C(sp<sup>3</sup>)-C(sp) coupling. *Nat. Chem.* **11**, 1158-1166 (2019). doi:10.1038/s41557-019-0346-2
10. Xia, Y., Wang, J. & Dong, G. Suzuki-miyaura coupling of simple ketones via activation of unstrained carbon-carbon bonds. *J. Am. Chem. Soc.* **140**, 5347-5351 (2018).

doi:10.1021/jacs.8b02462

11. Henderson, J.-R., Parvez, M. & Keay, B.-A. Diastereoselective diels-alder reactions of a novel cyclopropenyl-containing chiral auxiliary. *Org. Lett.* **9**, 5167-5170 (2007). doi: 10.1021/ol702280q
12. Spitzner, D. & Swoboda, H., Akzeptoren für die doppelte Michael-reaktion, eine verbesserte synthese von cyclopropylidencarbonsäureestern und deren reaktivität gegenüber cyclohexadienolaten. *Tetrahedron Letters* **27**, 1281-1284 (1986). doi: 10.1016/S0040-4039(00)84238-0
13. Scholz, D., Weber-Roth, S., Macoratti, E. & Francotte, E. Expedient synthesis of  $\alpha$ -substituted  $\alpha,\beta$ -unsaturated  $\gamma$ -amino acids (dipeptide mimetics); witting reaction of  $\alpha$ -amino aldehydes with  $\alpha$ -substituted alkoxy-carbonyl phosphoranes. *Syn. Commun.* **29**, 1143-1155 (1999). doi: 10.1080/00397919908086084
14. Trowbridge, A., Reich, D. & Gaunt, M.-J. Multicomponent synthesis of tertiary alkylamines by photocatalytic olefin-hydroaminoalkylation. *Nature* **561**, 522-527 (2018). doi: 10.1038/s41586-018-0537-9
15. Das, M., Vu, M.-D., Zhang, Q. & Liu, X.-W. Metal-free visible light photoredox enables generation of carbyne equivalents via phosphonium ylide C-H activation. *Chem. Sci.* **10**, 1687-1691 (2019). doi: 10.1039/c8sc04195d
